# Supplementary material
Source: MDPI journal article supplement (https://www.mdpi.com/2297-8739/10/9/488)
Supplement: s1 [file s1]

## Supporting information

# An in-depth stability study of the essential oils from *Mentha x piperita*, *M. spicata*, *Origanum vulgare*, *Thymus vulgaris*: the impact of thermal and storage conditions.

Eugenia Ganosi<sup>1,2</sup>, Christina Barda<sup>1</sup>, Maria-Eleni Grafakou<sup>3</sup>, Michael Ch. Rallis<sup>2</sup> and Helen Skaltsa<sup>1\*</sup>

<sup>1</sup> Department of Pharmacognosy & Chemistry of Natural Products, Faculty of Pharmacy, School of Health Sciences, National & Kapodistrian University of Athens, Greece; cbarda@pharm.uoa.gr; skaltsa@pharm.uoa.gr

<sup>2</sup> Department of Pharmaceutical Technology, Faculty of Pharmacy, School of Health Sciences, National & Kapodistrian University of Athens, Greece; eugeniagns@pharm.uoa.gr; rallis@pharm.uoa.gr

<sup>3</sup> Institute of Pharmaceutical Sciences, Department of Pharmacognosy, University of Graz, Austria; maria.grafakou@uni-graz.at

\*Correspondence: skaltsa@pharm.uoa.gr; Tel.: +30(210) 7274593

### List of content:

|                                                                                                                                                                             |    |
|-----------------------------------------------------------------------------------------------------------------------------------------------------------------------------|----|
| 1. Type of containers used for the stability study.....                                                                                                                     | 4  |
| 2. Photo documentation of selected essential oils.....                                                                                                                      | 4  |
| 3. GC-MS chromatograms of the <i>Origanum vulgare</i> L. essential oil .....                                                                                                | 7  |
| 3.1. GC-MS chromatogram of the initial <i>O. vulgare</i> essential oil .....                                                                                                | 7  |
| 3.2. GC-MS chromatograms of the <i>O. vulgare</i> essential oil during storage in glass tubes sealed with cap at room temperature (23 °C) under darkness for 6 months ..... | 7  |
| 3.3. GC-MS chromatograms of the <i>O. vulgare</i> essential oil during storage in glass tubes sealed with cap under direct sunlight exposure for 6 months .....             | 16 |
| 3.4. GC-MS chromatograms of the <i>O. vulgare</i> essential oil during storage in sealed glass ampoules at 35 °C for 3 months.....                                          | 24 |
| 3.5. GC-MS chromatograms of the <i>O. vulgare</i> essential oil during storage in sealed glass ampoules at 45 °C for 3 months.....                                          | 28 |
| 3.6. GC-MS chromatograms of the <i>O. vulgare</i> essential oil during storage in glass tubes sealed with cap at 35 °C for 3 months .....                                   | 32 |
| 3.7. GC-MS chromatograms of the <i>O. vulgare</i> essential oil during storage in glass tubes sealed with cap at 45 °C for 3 months .....                                   | 36 |
| 3.8. GC-MS chromatograms of the <i>O. vulgare</i> essential oil during storage in glass tubes sealed with cap at 4 °C for 6 months .....                                    | 40 |
| 3.9. GC-MS chromatogram of the <i>O. vulgare</i> essential oil during storage in metal container at 4 °C for 6 months .....                                                 | 43 |

|                                                                                                                                                                              |     |
|------------------------------------------------------------------------------------------------------------------------------------------------------------------------------|-----|
| 3.10. GC-MS chromatogram of the <i>O. vulgare</i> essential oil during storage in sealed glass ampoules at 4 °C for 6 months .....                                           | 44  |
| 3.11. GC-MS chromatogram of the <i>O. vulgare</i> essential oil during storage in glass tubes sealed with cap at -20 °C for 6 months .....                                   | 44  |
| 4. GC-MS chromatograms of the <i>Thymus vulgaris</i> L. essential oil.....                                                                                                   | 45  |
| 4.1. GC-MS chromatogram of the initial <i>T. vulgaris</i> essential oil.....                                                                                                 | 45  |
| 4.2. GC-MS chromatograms of the <i>T. vulgaris</i> essential oil during storage in glass tubes sealed with cap at room temperature (23 °C) under darkness for 6 months ..... | 45  |
| 4.3. GC-MS chromatograms of the <i>T. vulgaris</i> essential oil during storage in glass tubes sealed with cap under direct sunlight exposure for 6 months .....             | 54  |
| 4.4. GC-MS chromatograms of the <i>T. vulgaris</i> essential oil during storage in sealed glass ampoules at 35 °C for 3 months.....                                          | 62  |
| 4.5. GC-MS chromatograms of the <i>T. vulgaris</i> essential oil during storage in sealed glass ampoules at 45 °C for 3 months.....                                          | 66  |
| 4.6. GC-MS chromatograms of the <i>T. vulgaris</i> essential oil during storage in glass tubes sealed with cap at 35 °C for 3 months .....                                   | 70  |
| 4.7. GC-MS chromatograms of the <i>T. vulgaris</i> essential oil during storage in glass tubes sealed with cap at 45 °C for 3 months .....                                   | 74  |
| 4.8. GC-MS chromatograms of the <i>T. vulgaris</i> essential oil during storage in glass tubes sealed with cap at 4 °C for 6 months .....                                    | 78  |
| 4.9. GC-MS chromatogram of the <i>T. vulgaris</i> essential oil during storage in metal container at 4 °C for 6 months .....                                                 | 81  |
| 4.10. GC-MS chromatogram of the <i>T. vulgaris</i> essential oil during storage in sealed glass ampoules at 4 °C for 6 months .....                                          | 82  |
| 4.11. GC-MS chromatogram of the <i>T. vulgaris</i> essential oil during storage in glass tubes sealed with cap at -20 °C for 6 months .....                                  | 82  |
| 5. GC-MS chromatograms of the <i>Mentha spicata</i> L. essential oil .....                                                                                                   | 83  |
| 5.1. GC-MS chromatogram of the initial <i>M. spicata</i> essential oil .....                                                                                                 | 83  |
| 5.2. GC-MS chromatograms of the <i>M. spicata</i> essential oil during storage in glass tubes sealed with cap at room temperature (23 °C) under darkness for 6 months .....  | 83  |
| 5.3. GC-MS chromatograms of the <i>M. spicata</i> essential oil during storage in glass tubes sealed with cap under direct sunlight exposure for 6 months .....              | 92  |
| 5.4. GC-MS chromatograms of the <i>M. spicata</i> essential oil during storage in sealed glass ampoules at 35 °C for 3 months.....                                           | 101 |
| 5.5. GC-MS chromatograms of the <i>M. spicata</i> essential oil during storage in sealed glass ampoules at 45 °C for 3 months.....                                           | 105 |
| 5.6. GC-MS chromatograms of the <i>M. spicata</i> essential oil during storage in glass tubes sealed with cap at 35 °C for 3 months .....                                    | 109 |

|                                                                                                                                                                                |     |
|--------------------------------------------------------------------------------------------------------------------------------------------------------------------------------|-----|
| 5.7. GC-MS chromatograms of the <i>M. spicata</i> essential oil during storage in glass tubes sealed with cap at 45 °C for 3 months .....                                      | 113 |
| 5.8. GC-MS chromatograms of the <i>M. spicata</i> essential oil during storage in glass tubes sealed with cap at 4 °C for 6 months .....                                       | 117 |
| 5.9. GC-MS chromatogram of the <i>M. spicata</i> essential oil during storage in metal container at 4 °C for 6 months .....                                                    | 120 |
| 5.10. GC-MS chromatogram of the <i>M. spicata</i> essential oil during storage in sealed glass ampoules at 4 °C for 6 months .....                                             | 120 |
| 5.11. GC-MS chromatogram of the <i>M. spicata</i> essential oil during storage in glass tubes sealed with cap at -20 °C for 6 months .....                                     | 121 |
| 6. GC-MS chromatograms of the <i>Mentha x piperita</i> L. essential oil .....                                                                                                  | 121 |
| 6.1. GC-MS chromatogram of the initial <i>M. x piperita</i> essential oil .....                                                                                                | 121 |
| 6.2. GC-MS chromatograms of the <i>M. x piperita</i> essential oil during storage in glass tubes sealed with cap at room temperature (23 °C) under darkness for 6 months ..... | 122 |
| 6.3. GC-MS chromatograms of the <i>M. x piperita</i> essential oil during storage in glass tubes sealed with cap under direct sunlight exposure for 6 months .....             | 130 |
| 6.4. GC-MS chromatograms of the <i>M. x piperita</i> essential oil during storage in sealed glass ampoules at 35 °C for 3 months.....                                          | 139 |
| 6.5. GC-MS chromatograms of the <i>M. x piperita</i> essential oil during storage in sealed glass ampoules at 45 °C for 3 months .....                                         | 143 |
| 6.6. GC-MS chromatograms of the <i>M. x piperita</i> essential oil during storage in glass tubes sealed with cap at 35 °C for 3 months .....                                   | 147 |
| 6.7. GC-MS chromatograms of the <i>M. x piperita</i> essential oil during storage in glass tubes sealed with cap at 45 °C for 3 months .....                                   | 151 |
| 6.8. GC-MS chromatograms of the <i>M. x piperita</i> essential oil during storage in glass tubes sealed with cap at 4 °C for 6 months .....                                    | 155 |
| 6.9. GC-MS chromatogram of the <i>M. x piperita</i> essential oil during storage in metal container at 4 °C for 6 months .....                                                 | 158 |
| 6.10. GC-MS chromatogram of the <i>M. x piperita</i> essential oil during storage in sealed glass ampoules at 4 °C for 6 months .....                                          | 158 |
| 6.11. GC-MS chromatogram of the <i>M. x piperita</i> essential oil during storage in glass tubes sealed with cap at -20 °C for 6 months .....                                  | 159 |

## 1. Type of containers used for the stability study

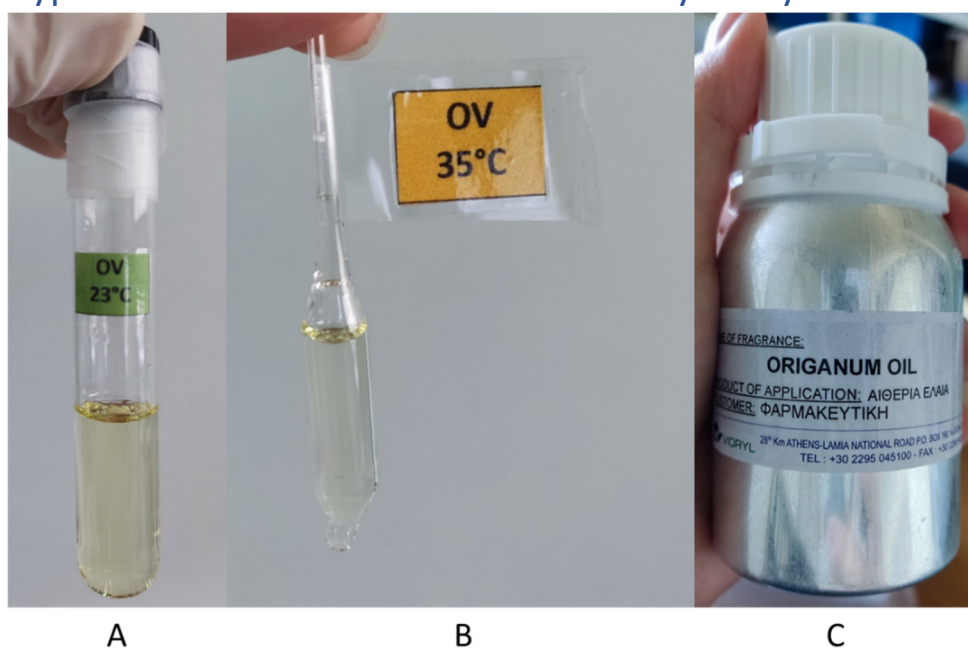

Figure 1 The three types of containers used in the stability study: A. glass tubes sealed with cap B. glass sealed ampoule and C. metal container

## 2. Photo documentation of selected essential oils

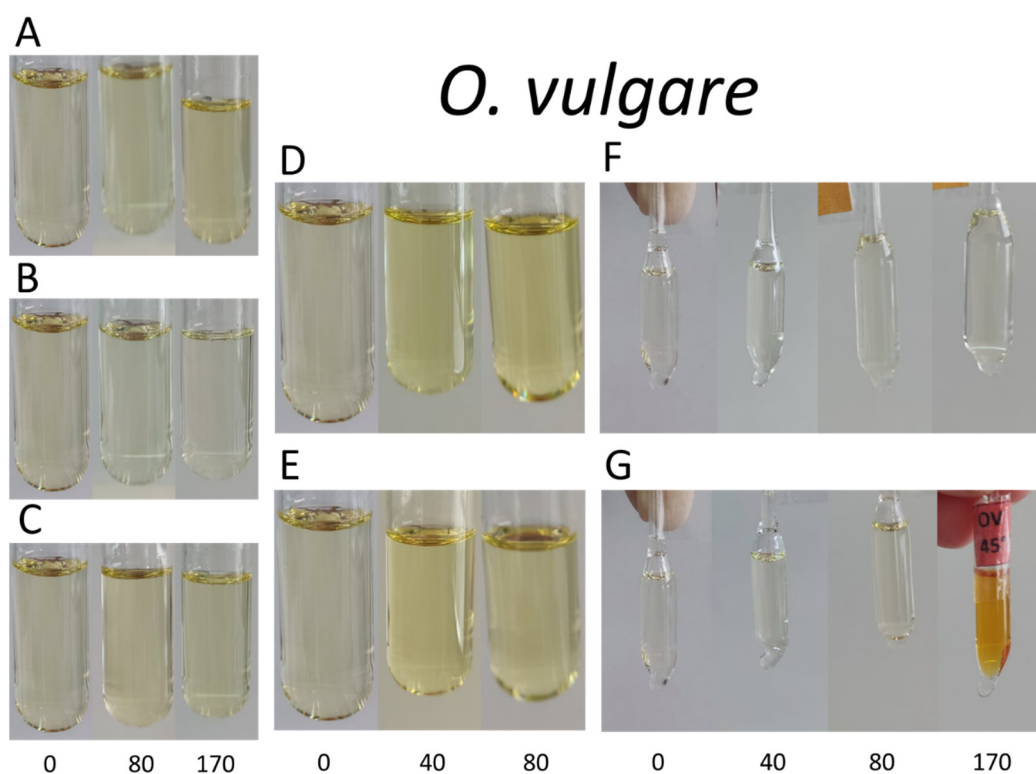

Figure 2 : Photo documentation on different days (0, 40, 80, 170) of *O. vulgare* after storage in various conditions: A. at room temperature in glass tubes sealed with cap; B. in direct sunlight exposure in glass tubes sealed with cap; C. at 4 °C in glass tubes sealed with cap; D. at 35 °C in glass tubes sealed with cap; E. at 45 °C in glass tubes sealed with cap; F. at 35 °C in sealed glass ampoules; G. at 45 °C in sealed glass ampoules

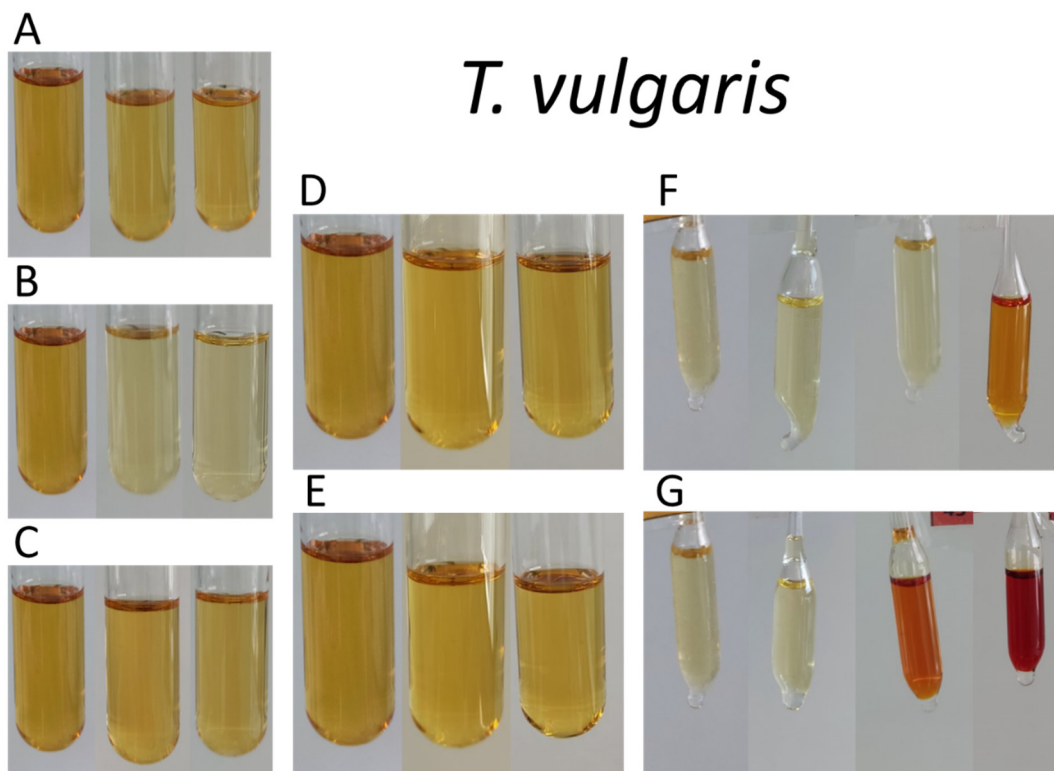

Figure 3: Photo documentation on different days (0, 40, 80, 170) of *T. vulgaris* after storage in various conditions: A. at room temperature in glass tubes sealed with cap; B. in direct sunlight exposure in glass tubes sealed with cap; C. at 4 °C in glass tubes sealed with cap; D. at 35 °C in glass tubes sealed with cap; E. at 45 °C in glass tubes sealed with cap; F. at 35 °C in sealed glass ampoules; G. at 45 °C in sealed glass ampoules

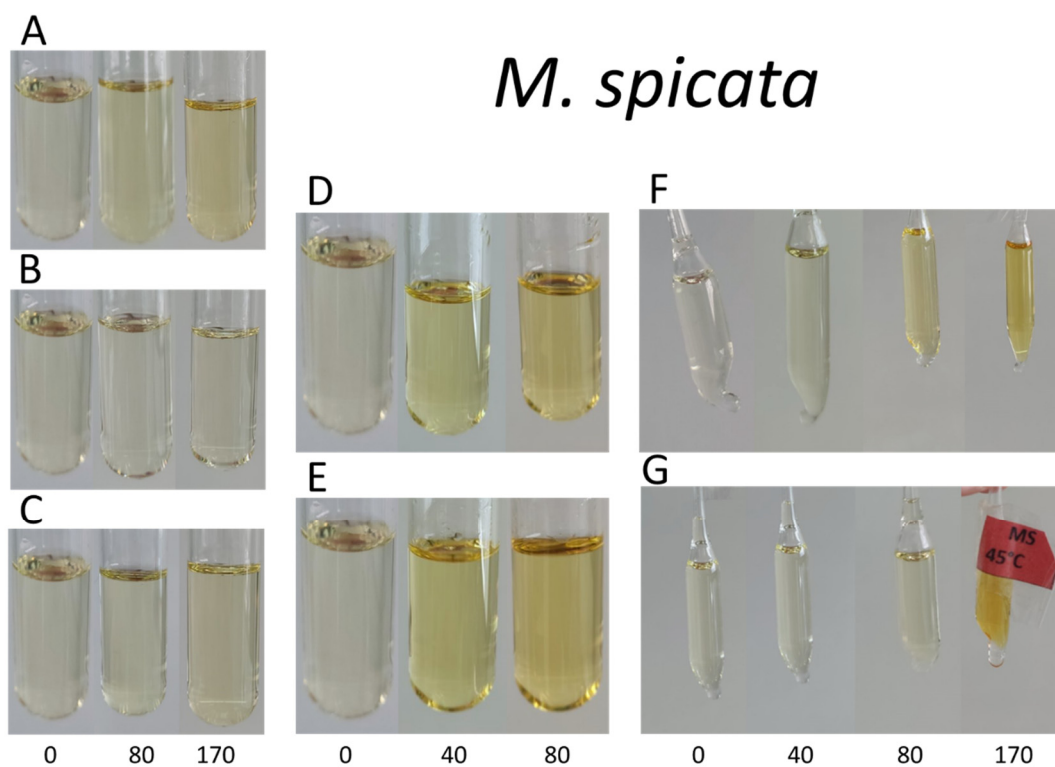

Figure 4: Photo documentation on different days (0, 40, 80, 170) of *M. spicata* after storage in various conditions: A. at room temperature in glass tubes sealed with cap; B. in direct sunlight exposure in glass tubes sealed with cap;

C. at 4 °C in glass tubes sealed with cap; D. at 35 °C in glass tubes sealed with cap; E. at 45 °C in glass tubes sealed with cap; F. at 35 °C in sealed glass ampoules; G. at 45 °C in sealed glass ampoules

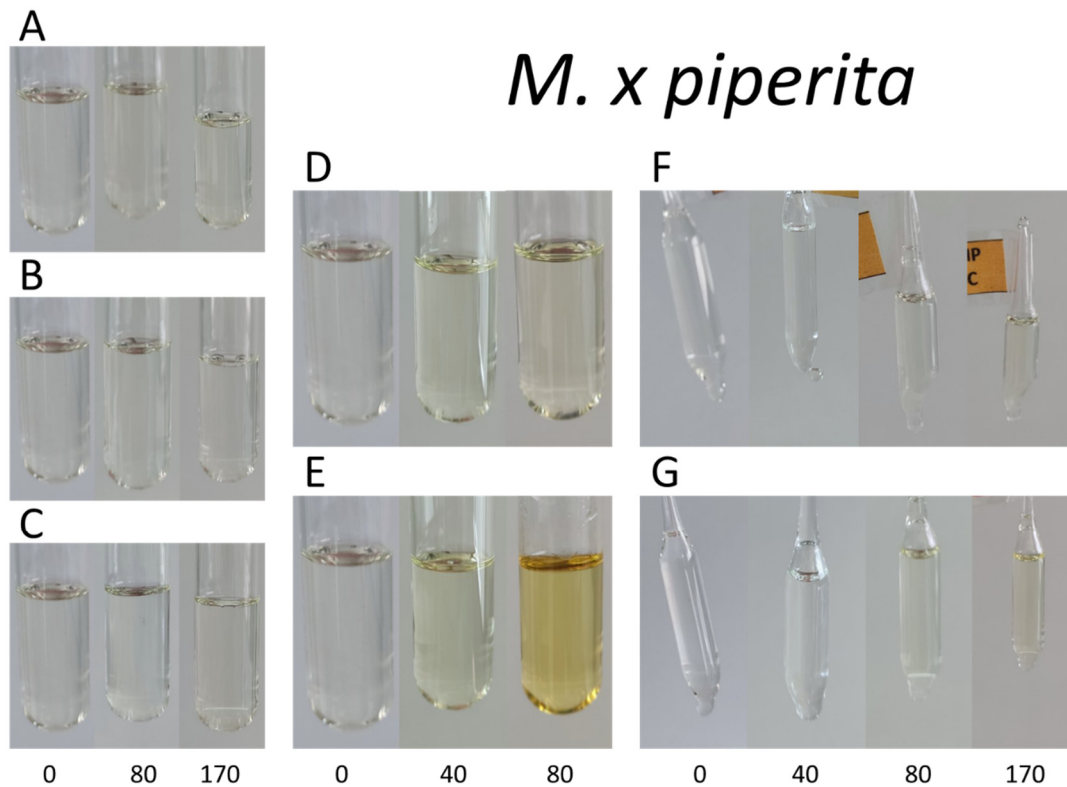

Figure 5: Photo documentation on different days (0, 40, 80, 170) of *M. x piperita* after storage in various conditions: A. at room temperature in glass tubes sealed with cap; B. in direct sunlight exposure in glass tubes sealed with cap; C. at 4 °C in glass tubes sealed with cap; D. at 35 °C in glass tubes sealed with cap; E. at 45 °C in glass tubes sealed with cap; F. at 35 °C in sealed glass ampoules; G. at 45 °C in sealed glass ampoules

### 3. GC-MS chromatograms of the *Origanum vulgare* L. essential oil

#### 3.1. GC-MS chromatogram of the initial *O. vulgare* essential oil

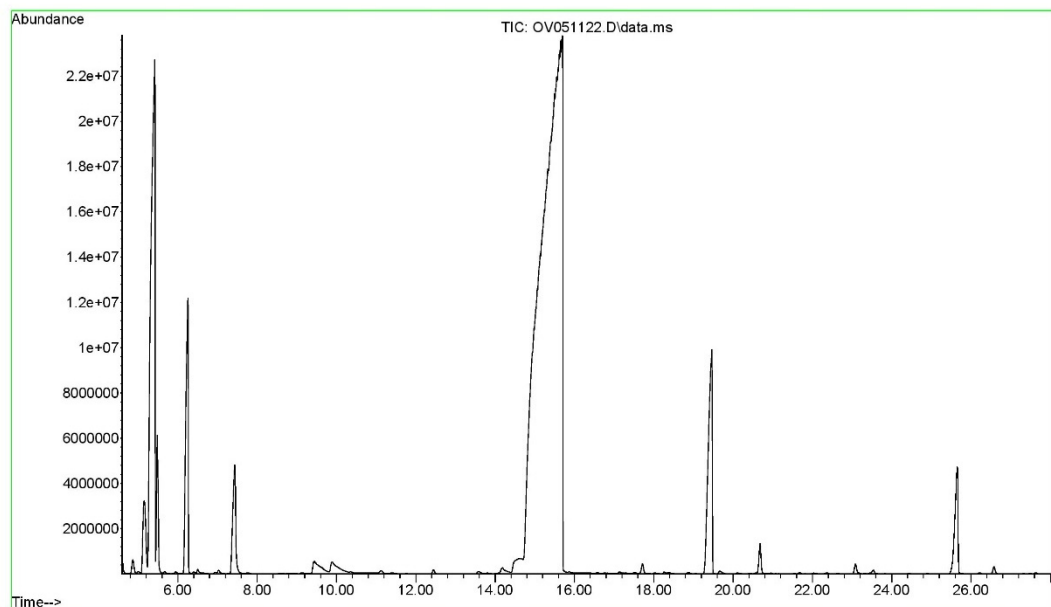

Figure 6 GC-MS chromatogram of *O. vulgare* before storage

#### 3.2. GC-MS chromatograms of the *O. vulgare* essential oil during storage in glass tubes sealed with cap at room temperature (23 °C) under darkness for 6 months

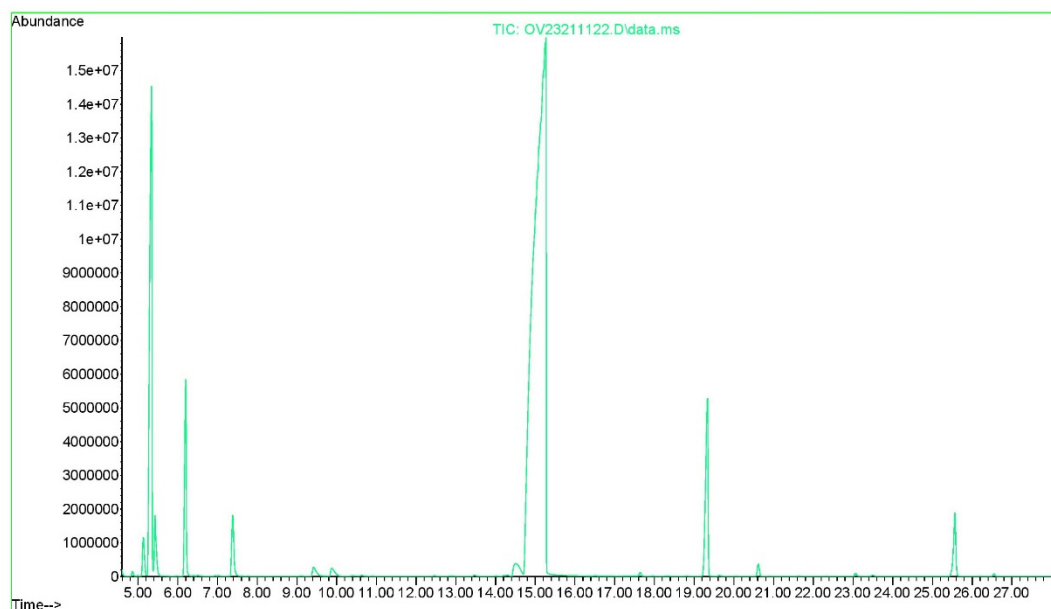

Figure 7. GC-MS chromatogram of *O. vulgare* after 10 days of storage

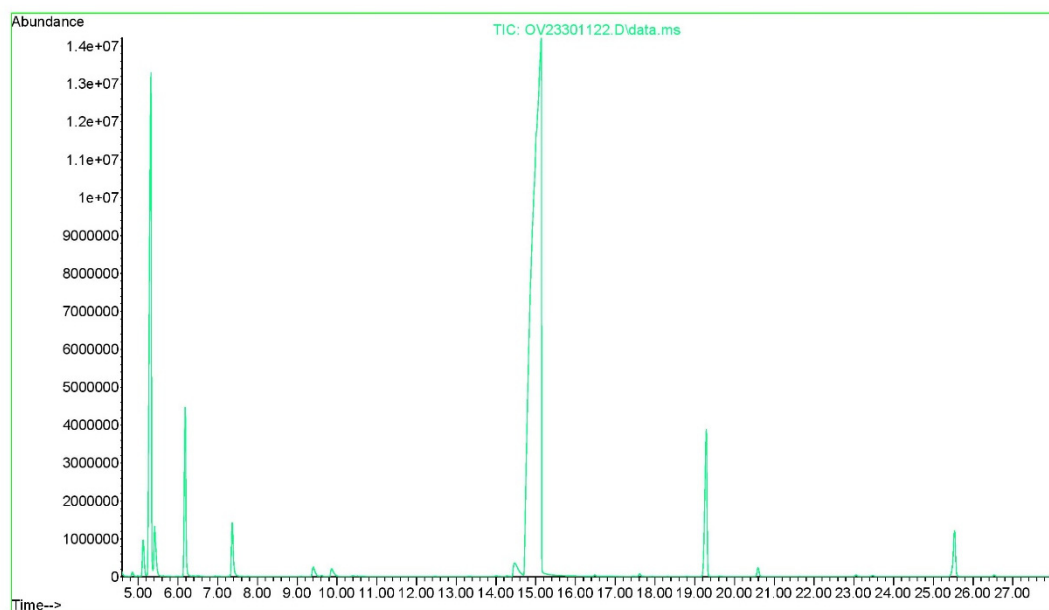

Figure 8 GC-MS chromatogram of *O. vulgare* after 20 days of storage

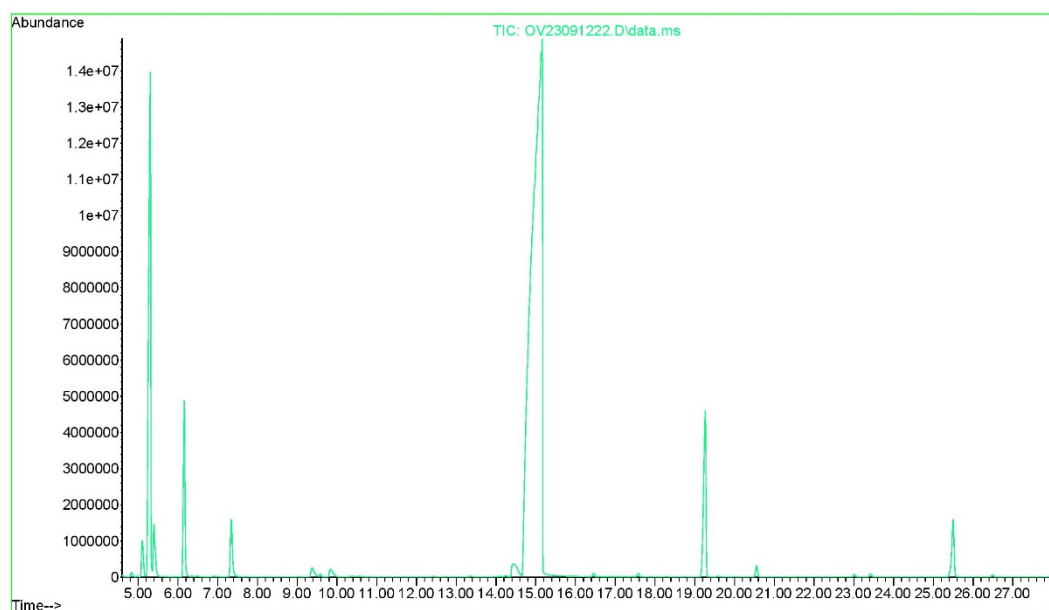

Figure 9 GC-MS chromatogram of *O. vulgare* after 30 days of storage

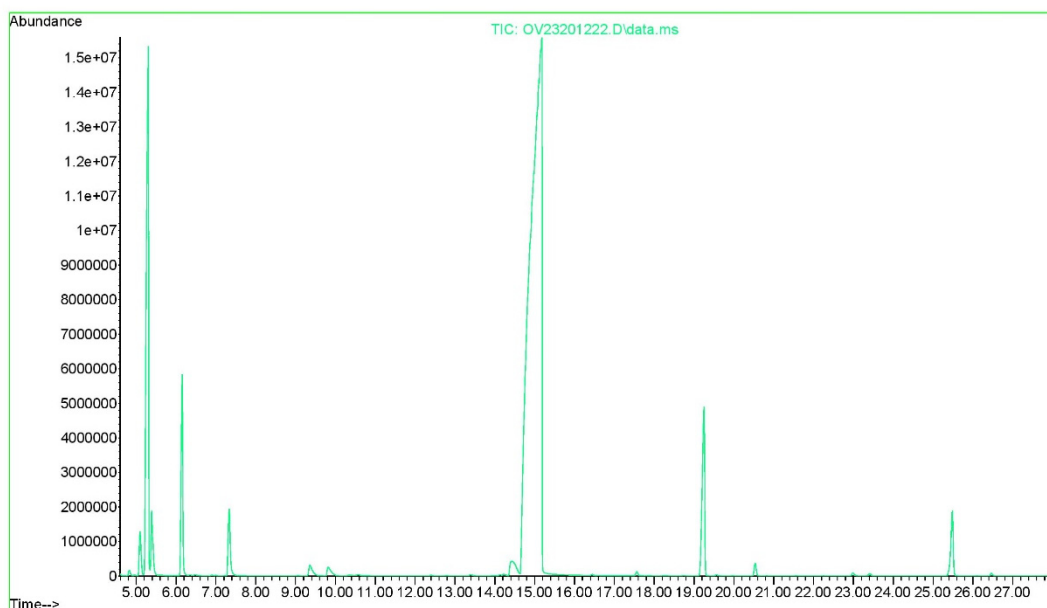

Figure 10 GC-MS chromatogram of *O. vulgare* after 40 days of storage

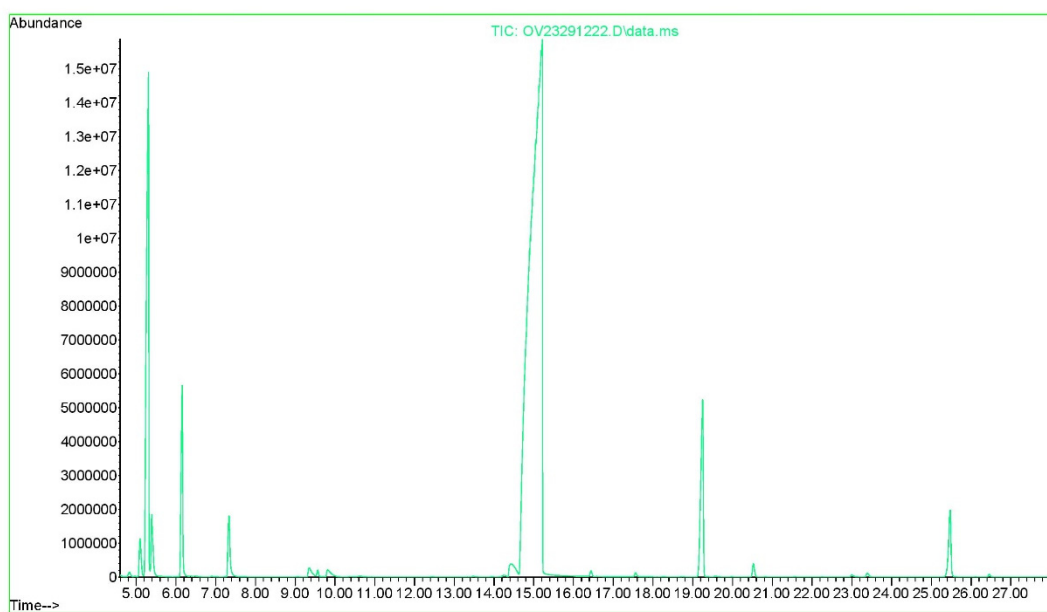

Figure 11 GC-MS chromatogram of *O. vulgare* after 50 days of storage

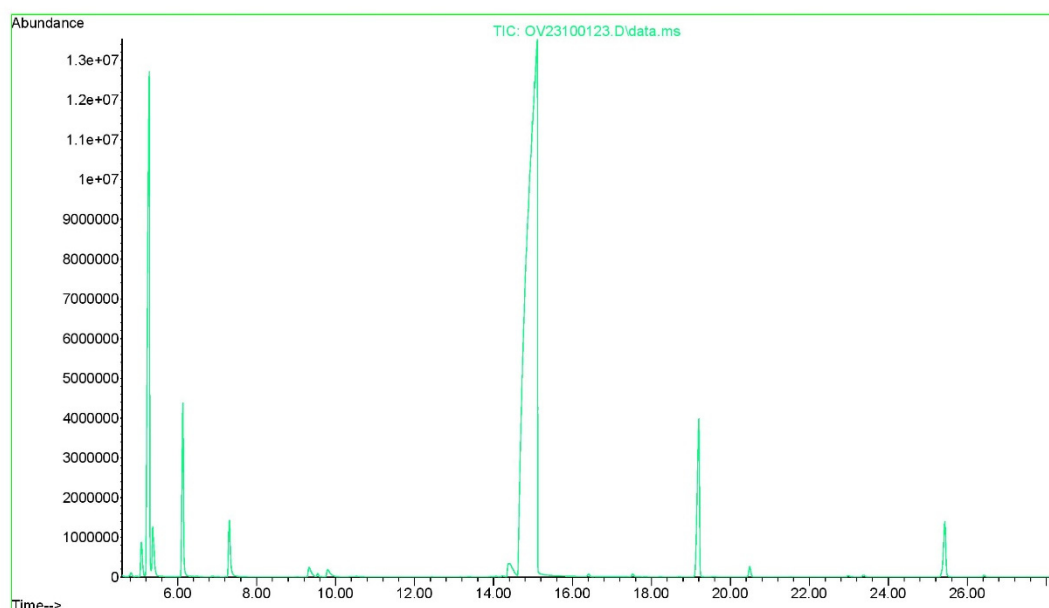

Figure 12 GC-MS chromatogram of *O. vulgare* after 60 days of storage

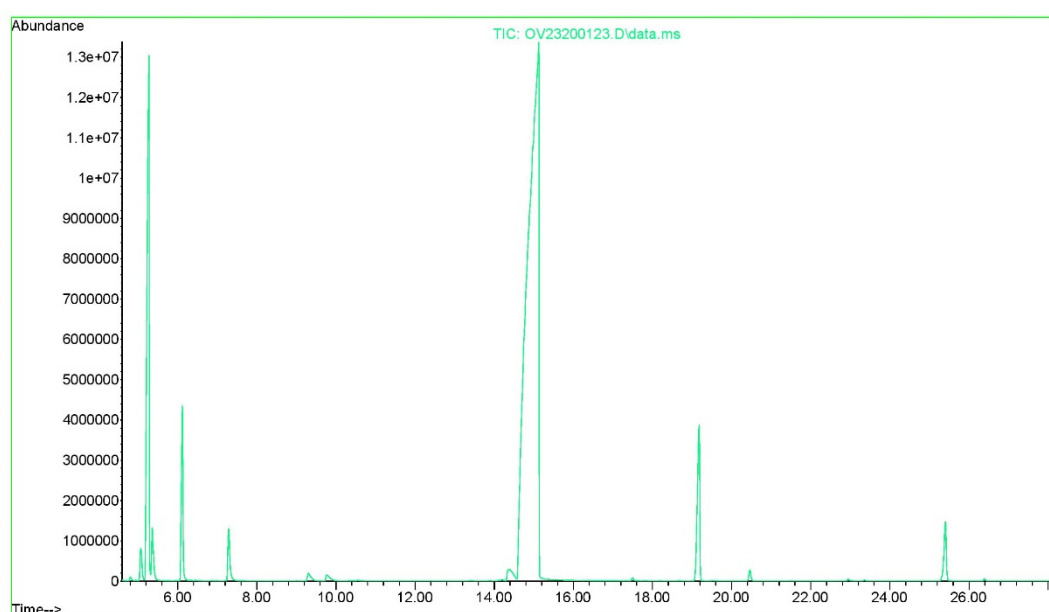

Figure 13 GC-MS chromatogram of *O. vulgare* after 70 days of storage

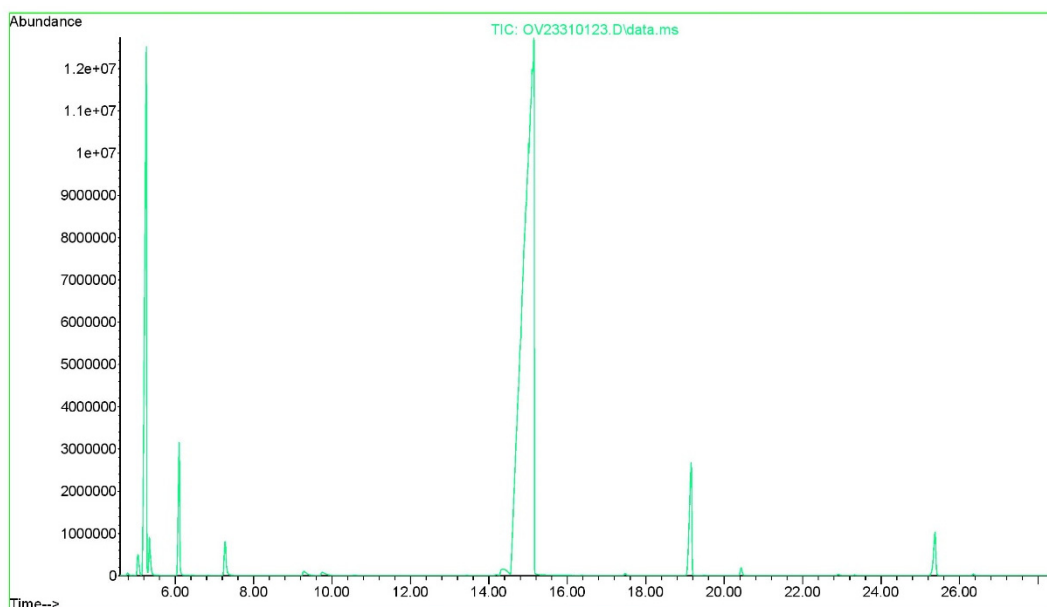

Figure 14 GC-MS chromatogram of *O. vulgare* after 80 days of storage

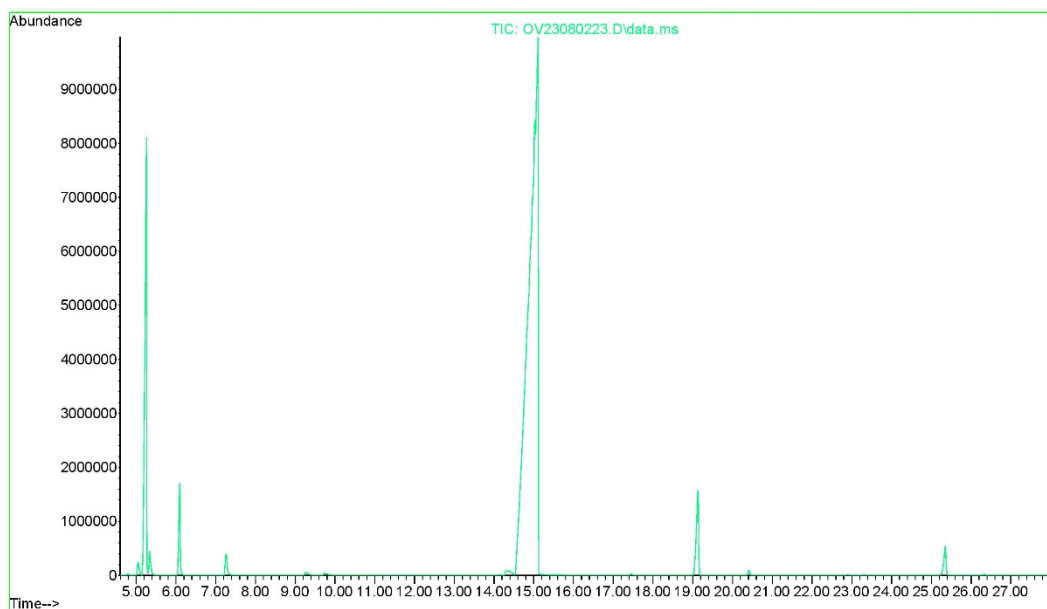

Figure 15 GC-MS chromatogram of *O. vulgare* after 90 days of storage

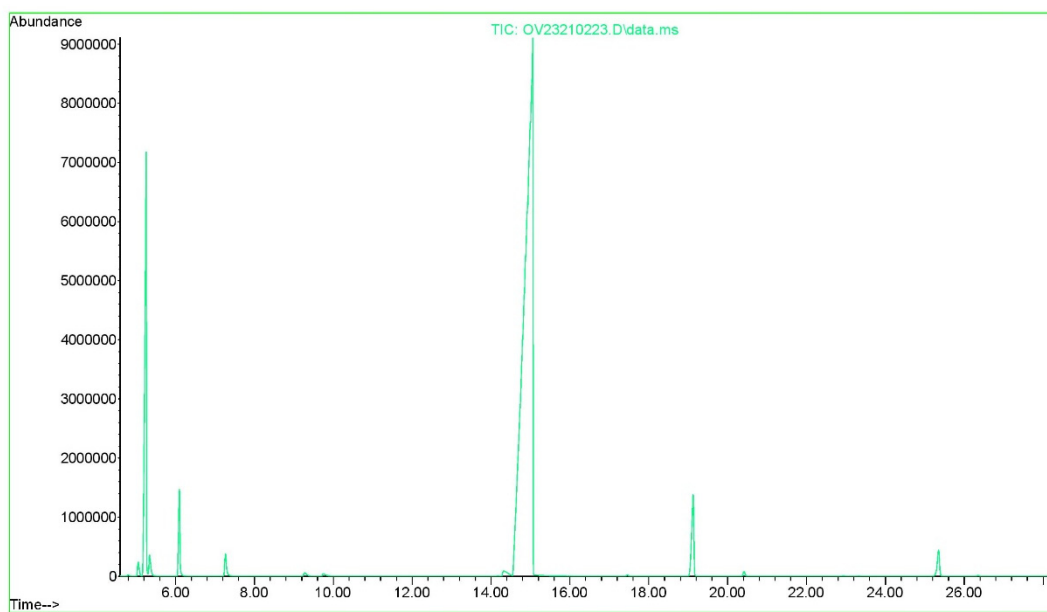

Figure 16 GC-MS chromatogram of *O. vulgare* after 100 days of storage

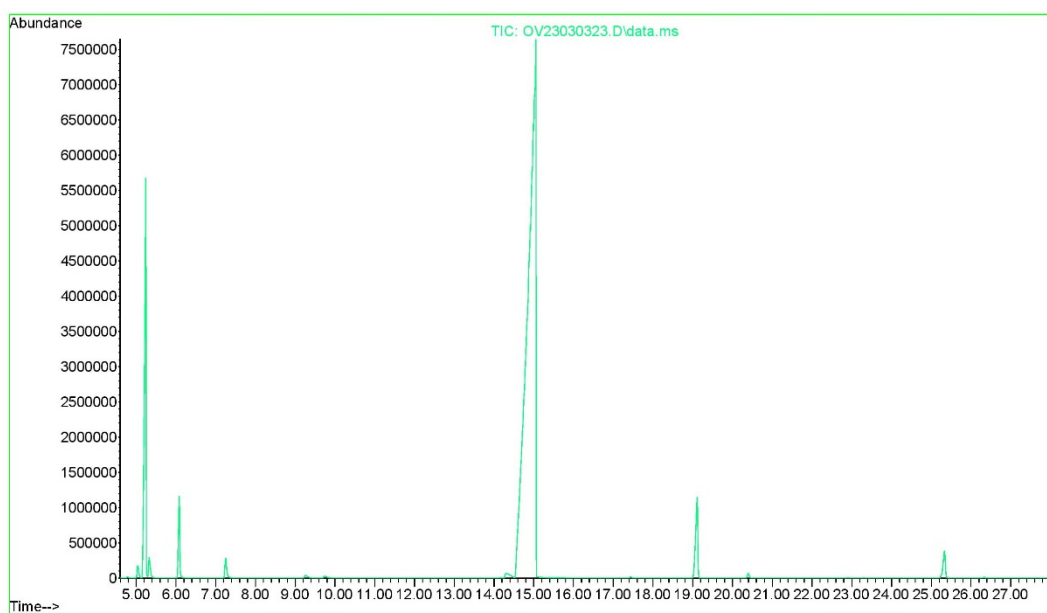

Figure 17 GC-MS chromatogram of *O. vulgare* after 110 days of storage

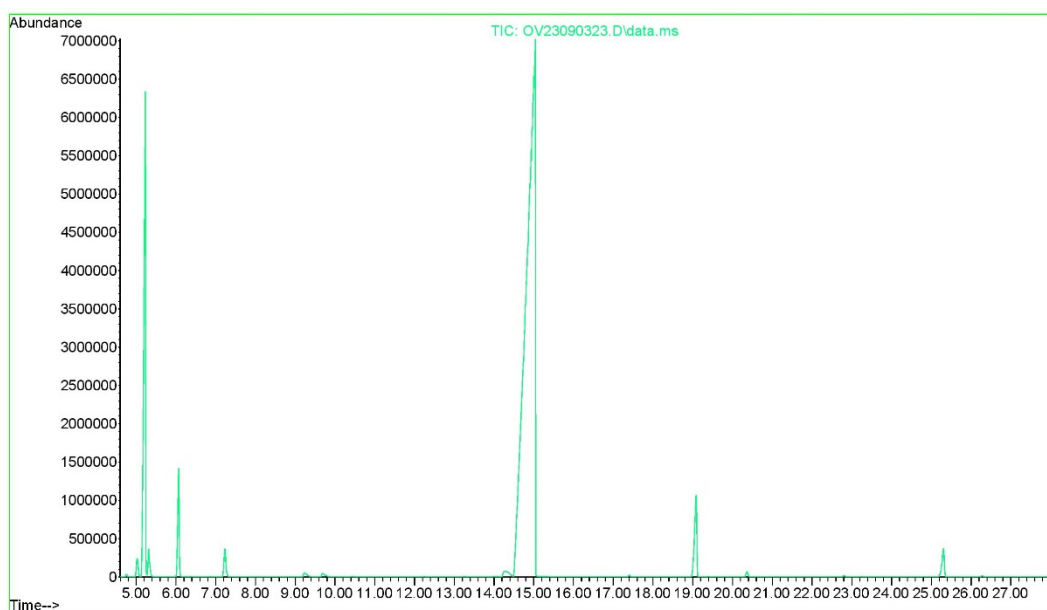

Figure 18 GC-MS chromatogram of *O. vulgare* after 120 days of storage

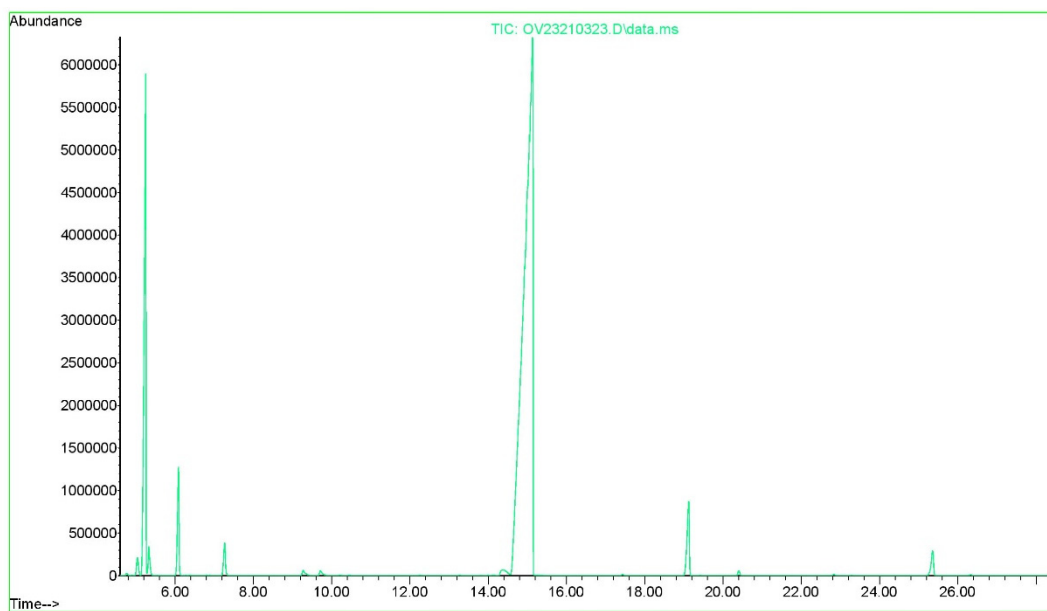

Figure 19 GC-MS chromatogram of *O. vulgare* after 130 days of storage

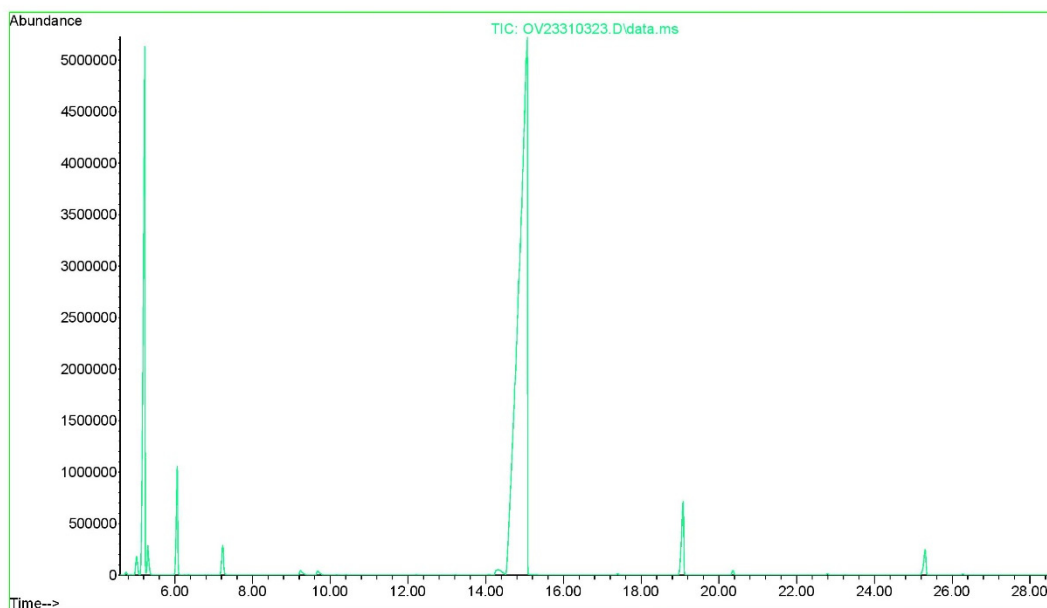

Figure 20 GC-MS chromatogram of *O. vulgare* after 140 days of storage

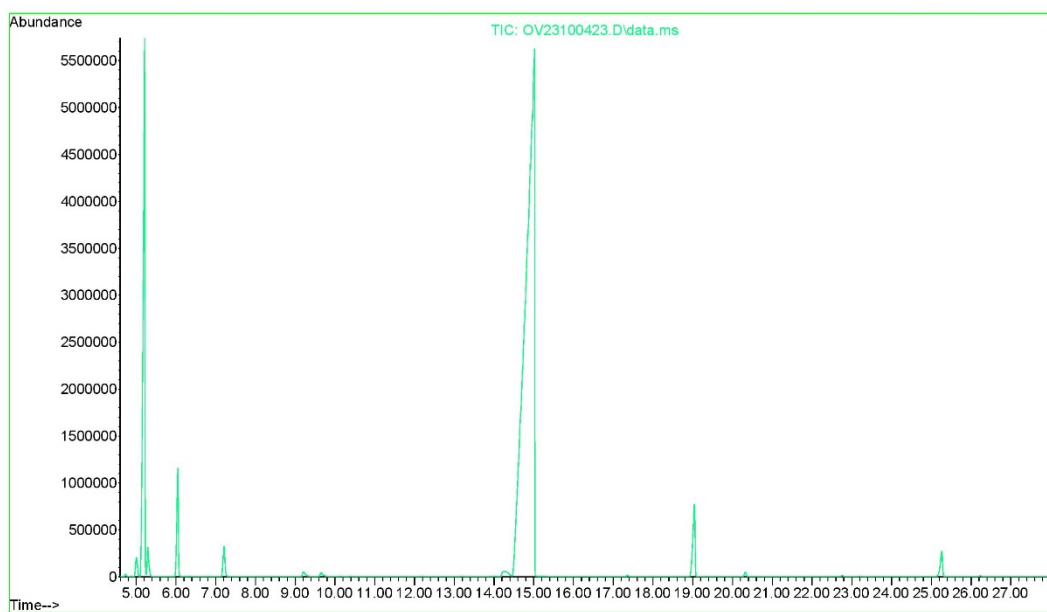

Figure 21 GC-MS chromatogram of *O. vulgare* after 150 days of storage

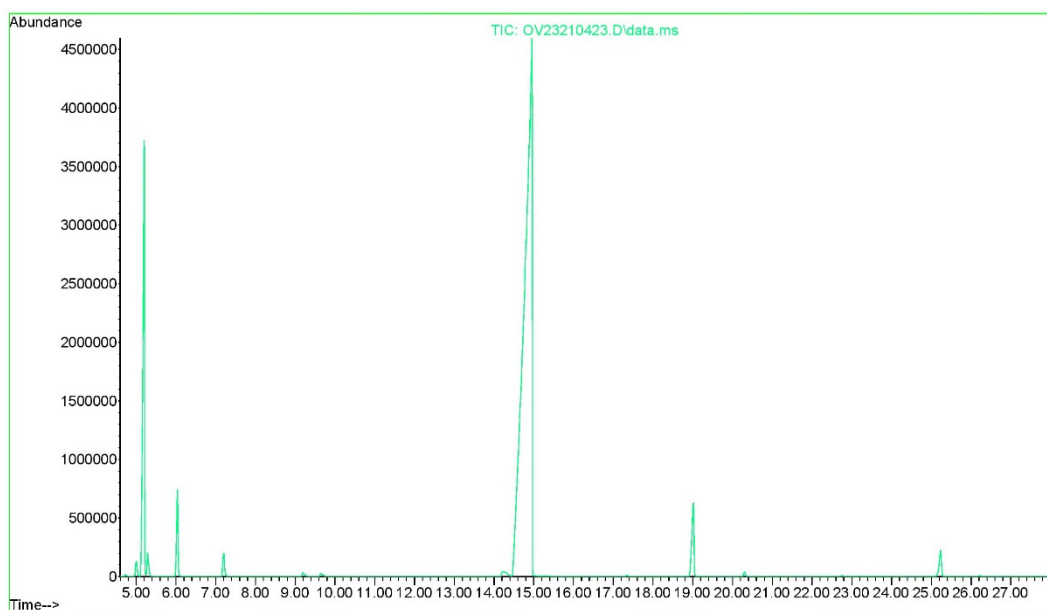

Figure 22 GC-MS chromatogram of *O. vulgare* after 160 days of storage

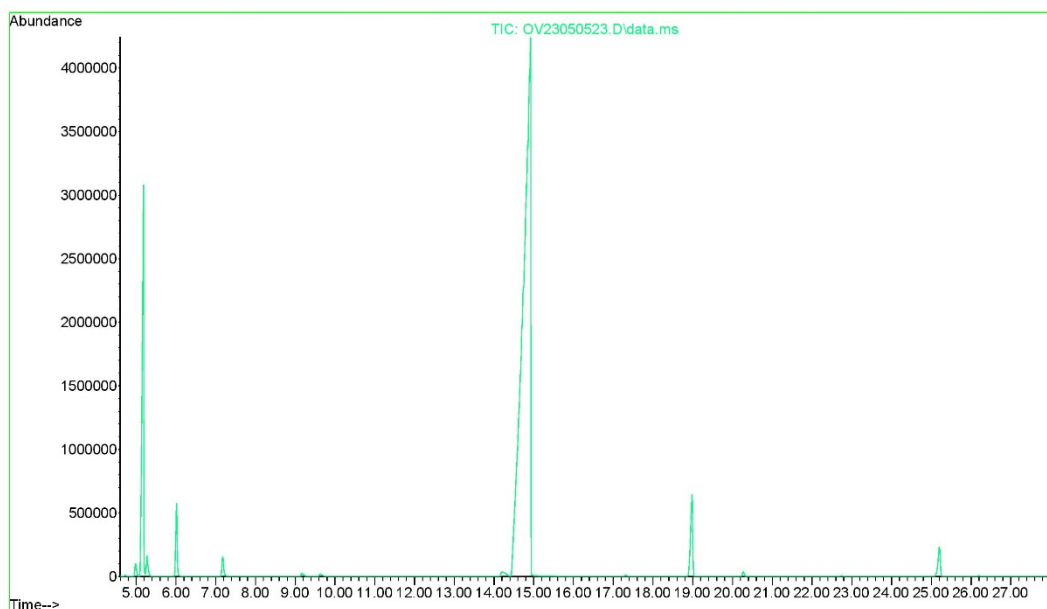

Figure 23 GC-MS chromatogram of *O. vulgare* after 170 days of storage

### 3.3. GC-MS chromatograms of the *O. vulgare* essential oil during storage in glass tubes sealed with cap under direct sunlight exposure for 6 months

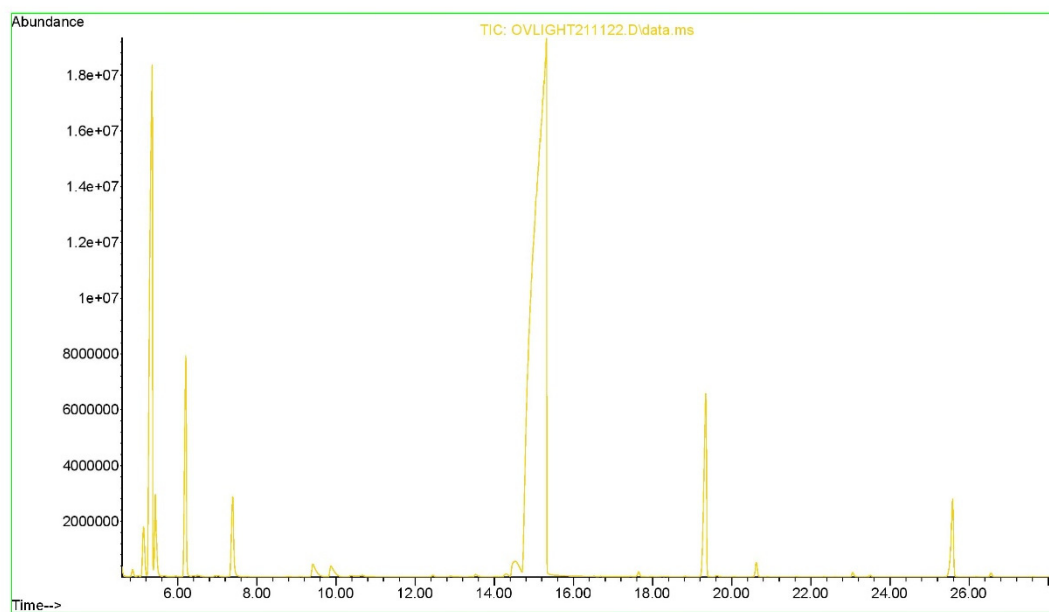

Figure 24 GC-MS chromatogram of *O. vulgare* after 10 days of storage

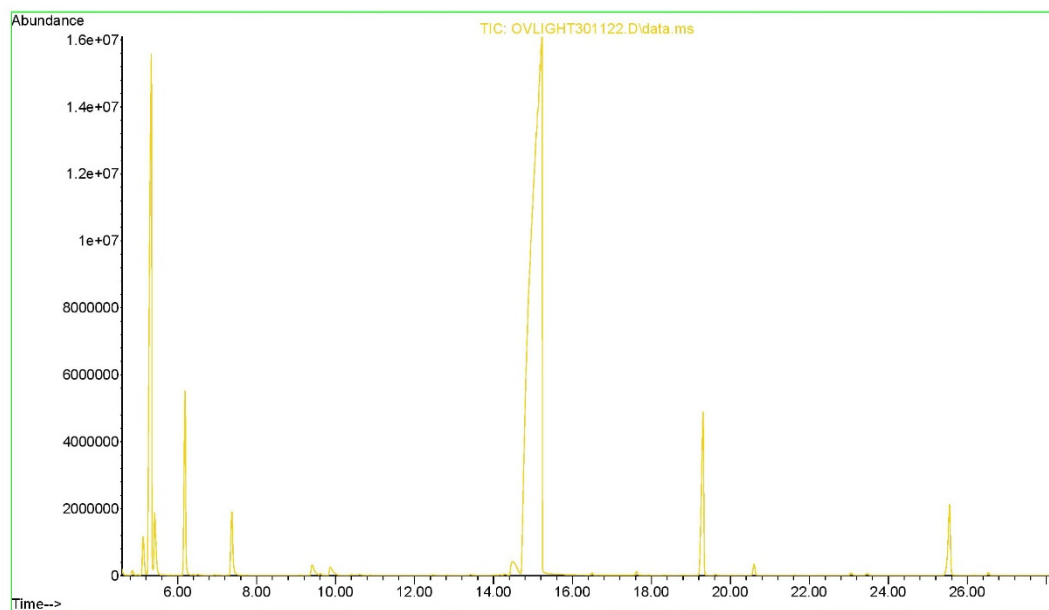

Figure 25 GC-MS chromatogram of *O. vulgare* after 20 days of storage

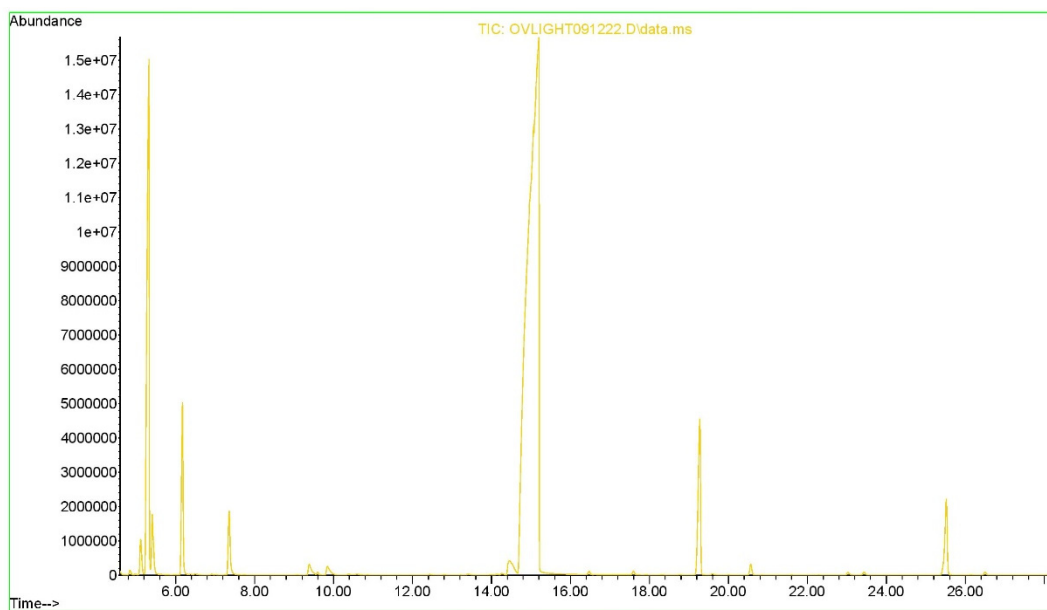

Figure 26 GC-MS chromatogram of *O. vulgare* after 30 days of storage

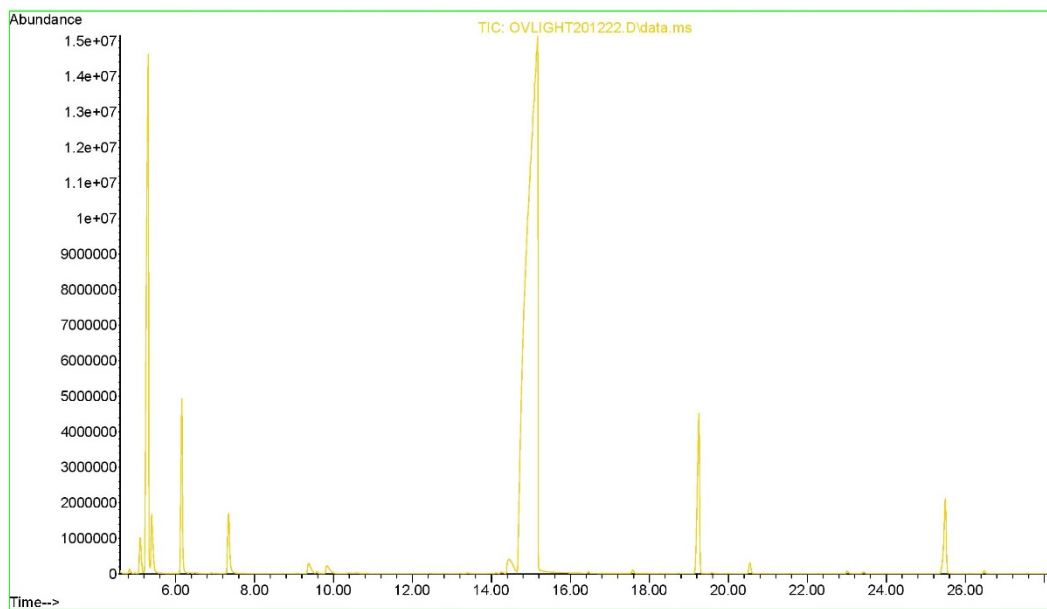

Figure 27 GC-MS chromatogram of *O. vulgare* after 40 days of storage

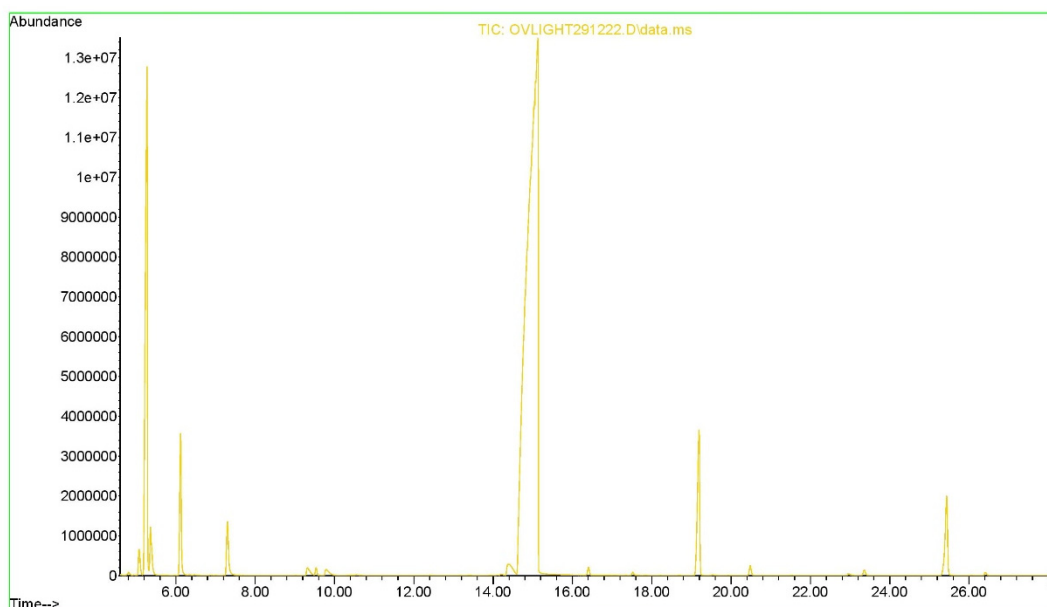

Figure 28 GC-MS chromatogram of *O. vulgare* after 50 days of storage

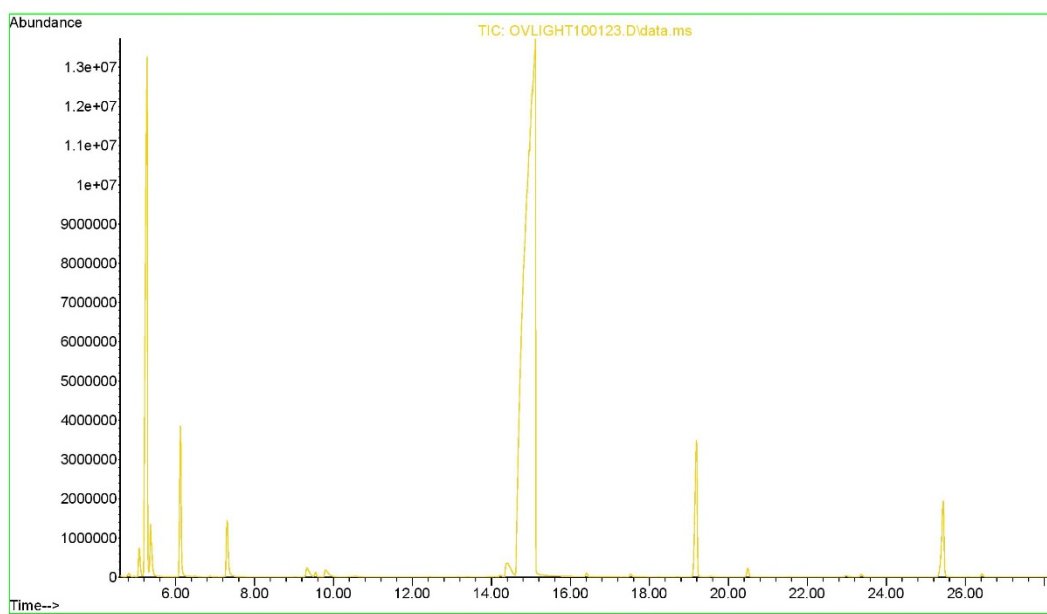

Figure 29 GC-MS chromatogram of *O. vulgare* after 60 days of storage

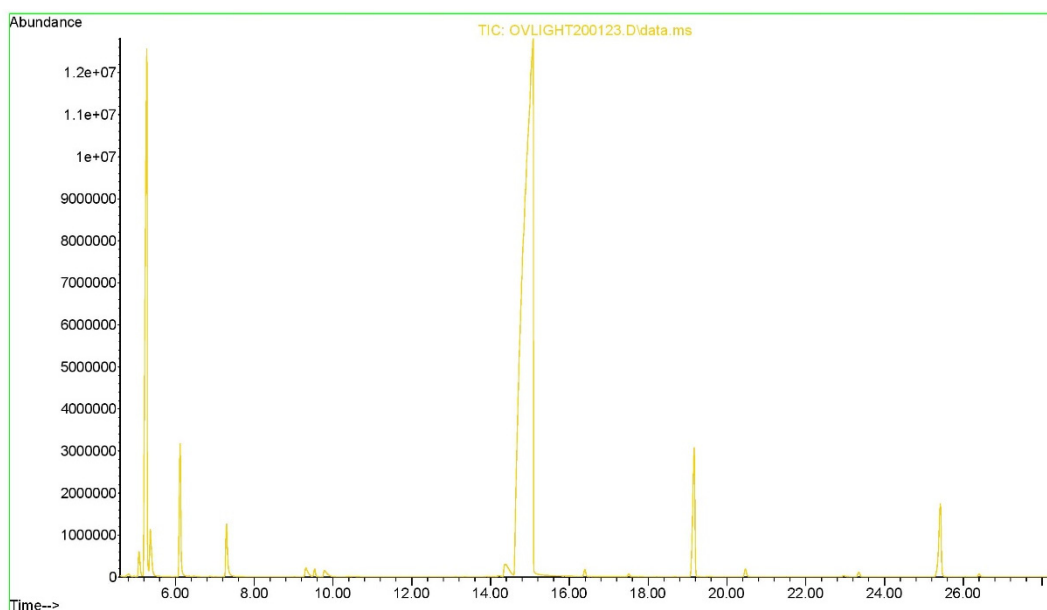

Figure 30 GC-MS chromatogram of *O. vulgare* after 70 days of storage

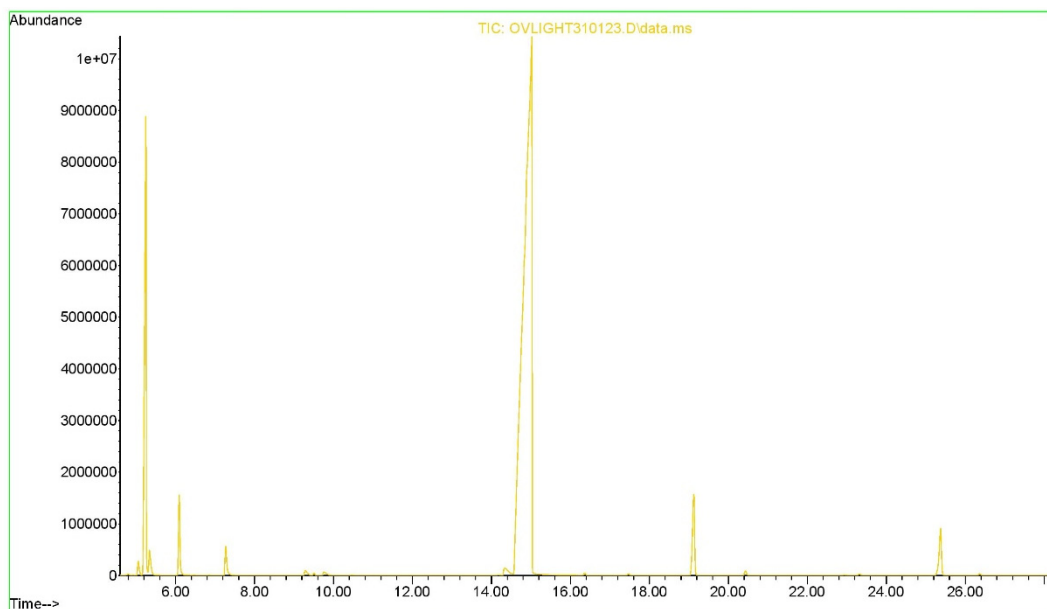

Figure 31 GC-MS chromatogram of *O. vulgare* after 80 days of storage

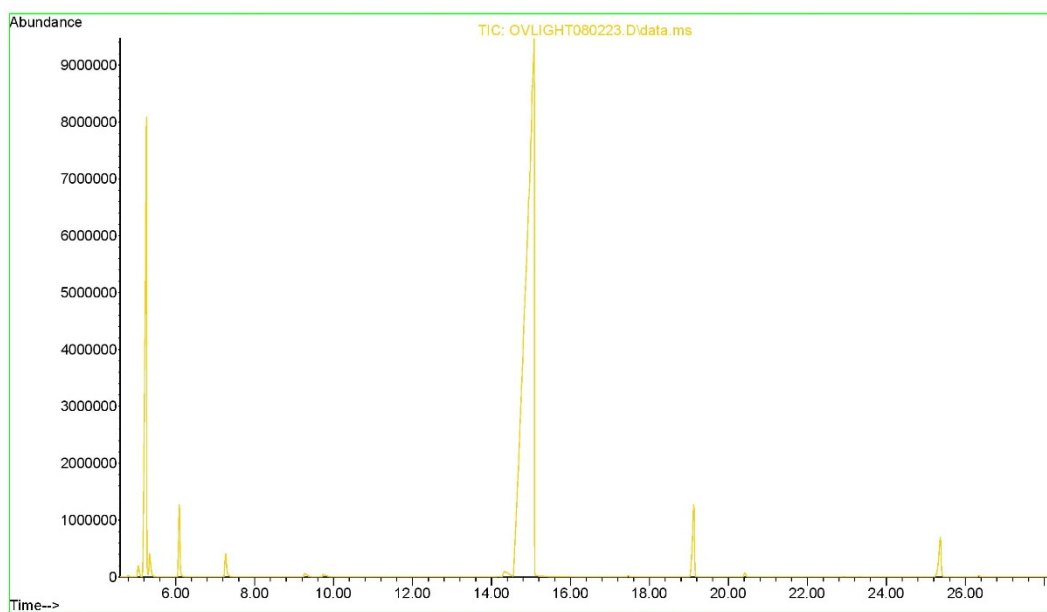

Figure 32 GC-MS chromatogram of *O. vulgare* after 90 days of storage

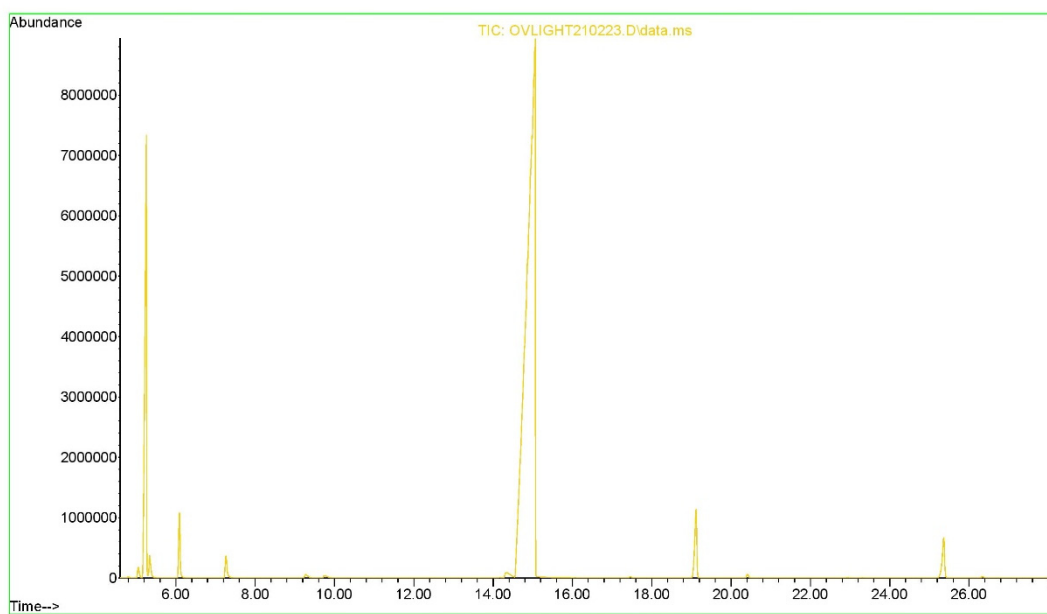

Figure 33 GC-MS chromatogram of *O. vulgare* after 100 days of storage

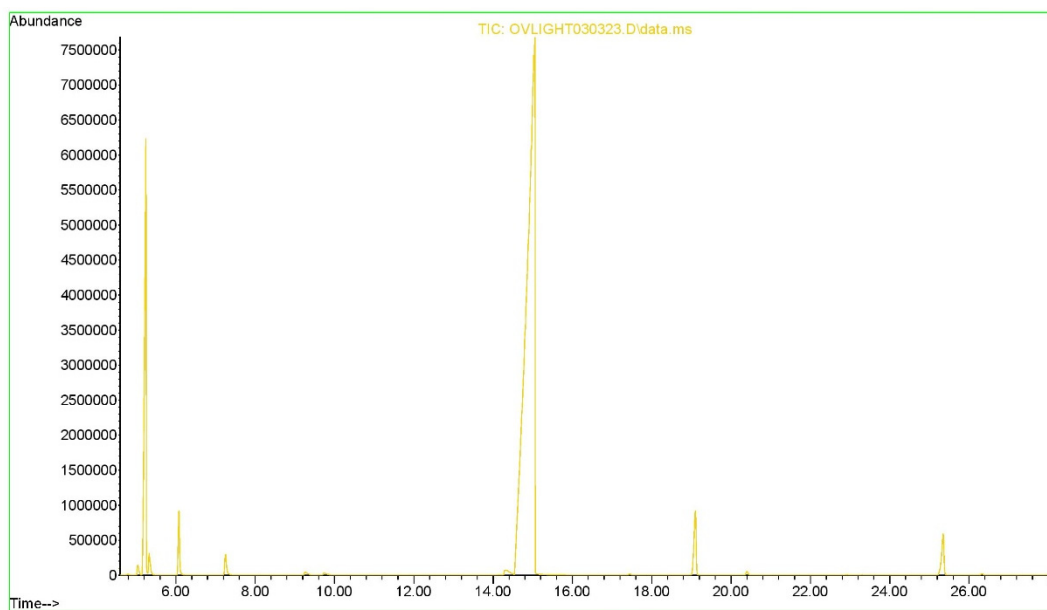

Figure 34 GC-MS chromatogram of *O. vulgare* after 110 days of storage

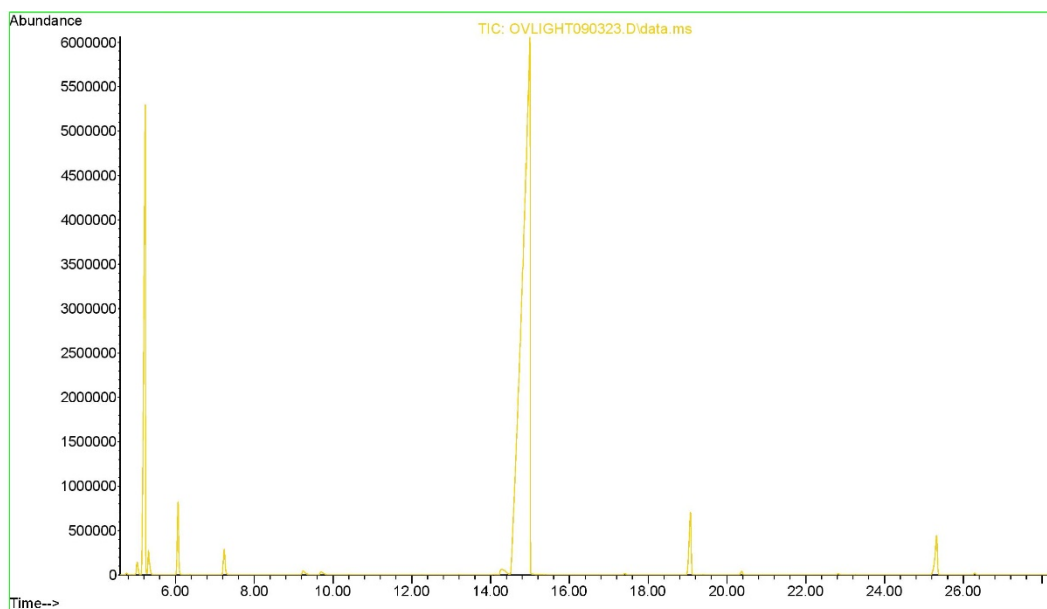

Figure 35 GC-MS chromatogram of *O. vulgare* after 120 days of storage

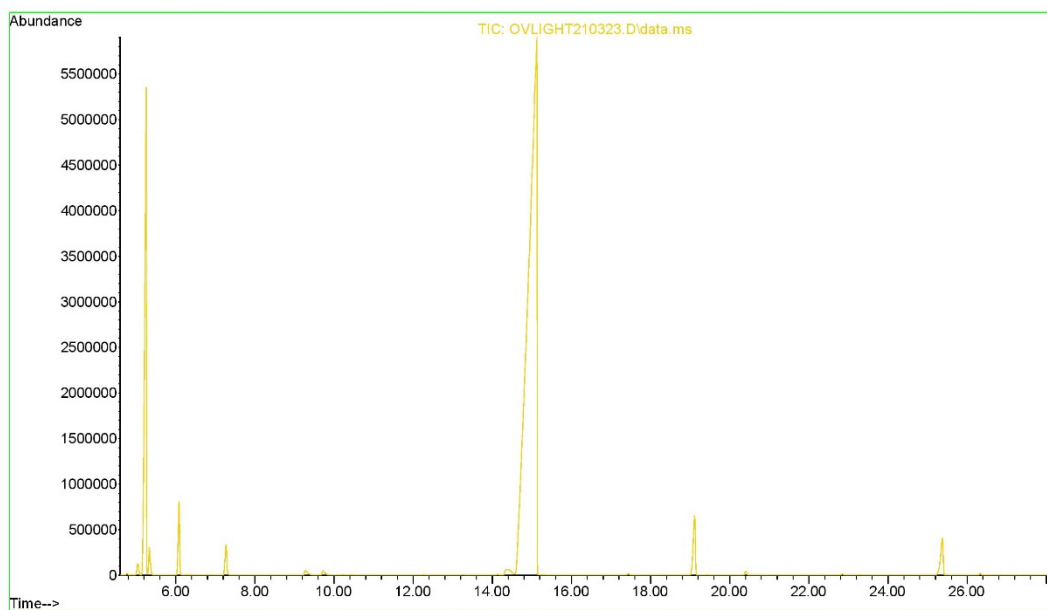

Figure 36 GC-MS chromatogram of *O. vulgare* after 130 days of storage

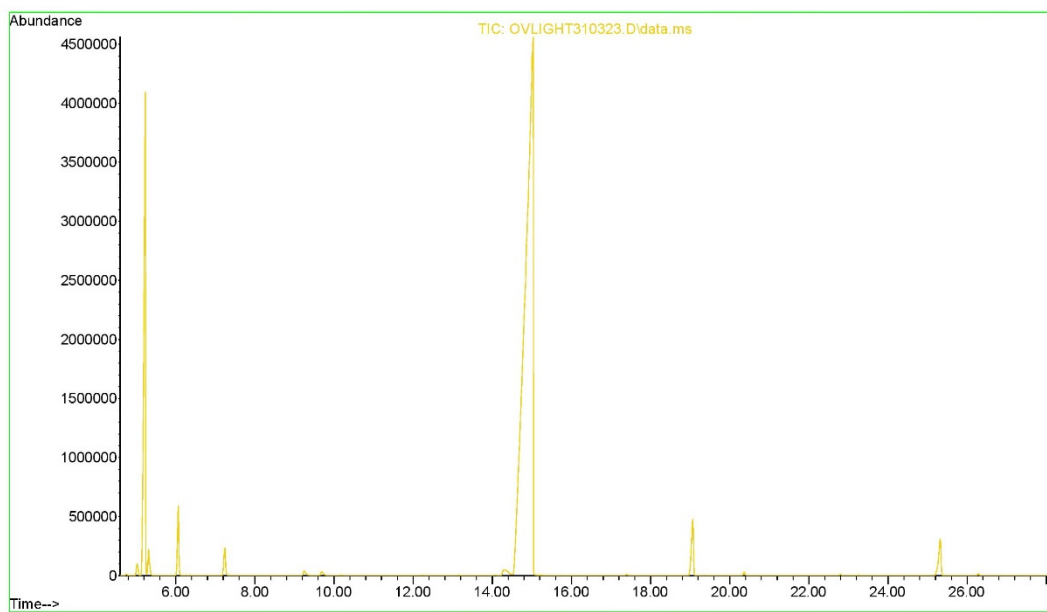

Figure 37 GC-MS chromatogram of *O. vulgare* after 140 days of storage

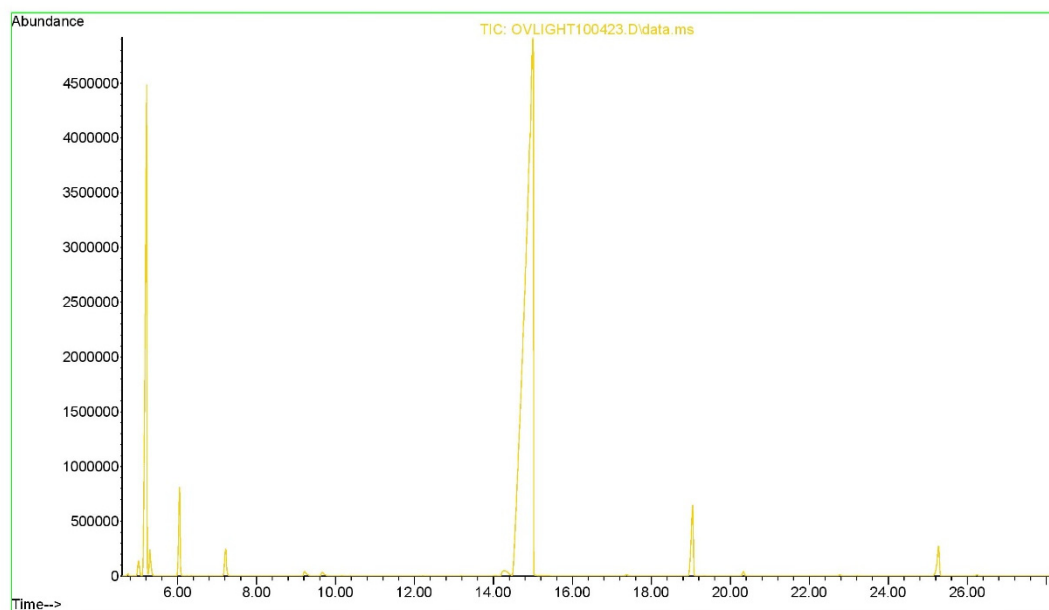

Figure 38 GC-MS chromatogram of *O. vulgare* after 150 days of storage

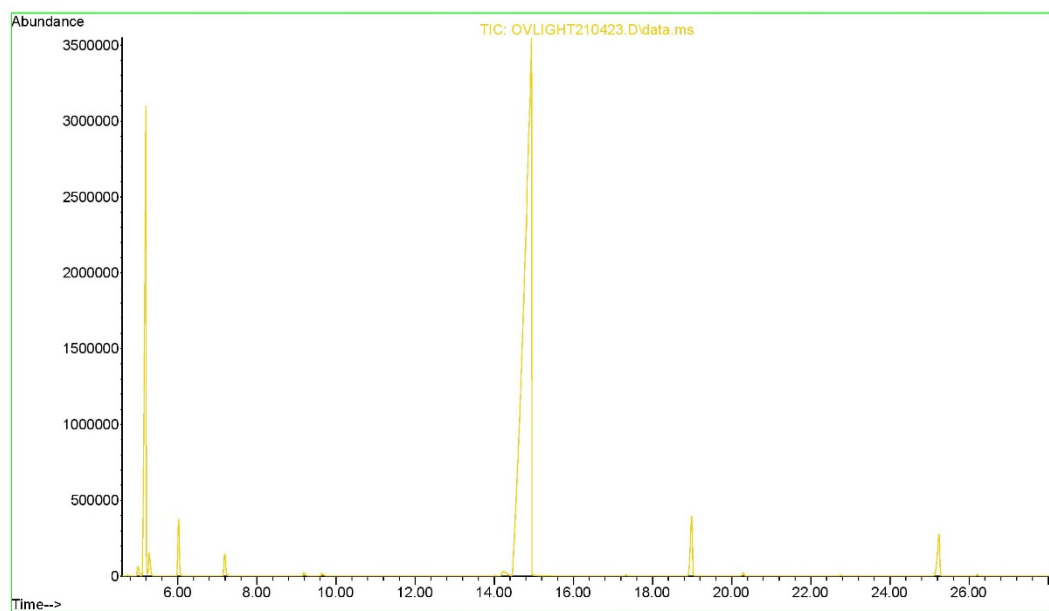

Figure 39 GC-MS chromatogram of *O. vulgare* after 160 days of storage

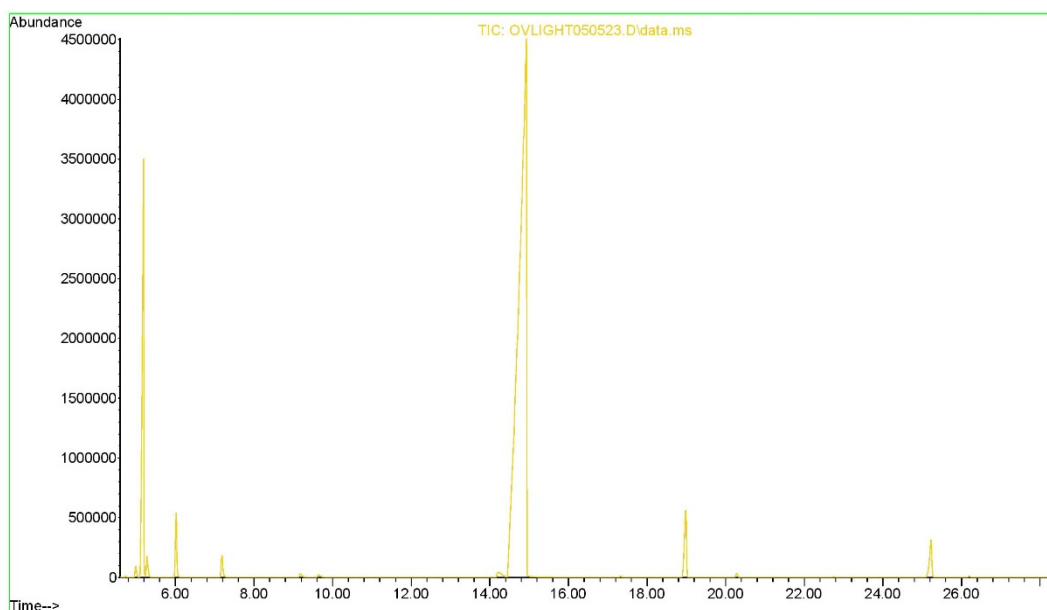

Figure 40 GC-MS chromatogram of *O. vulgare* after 170 days of storage

### 3.4. GC-MS chromatograms of the *O. vulgare* essential oil during storage in sealed glass ampoules at 35 °C for 3 months

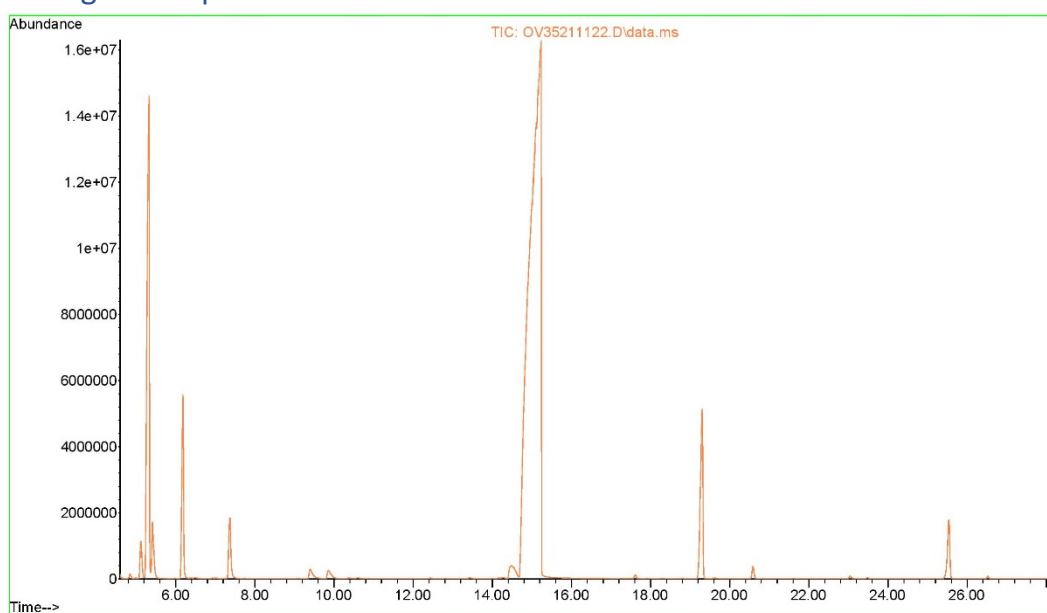

Figure 41 GC-MS chromatogram of *O. vulgare* after 10 days of storage

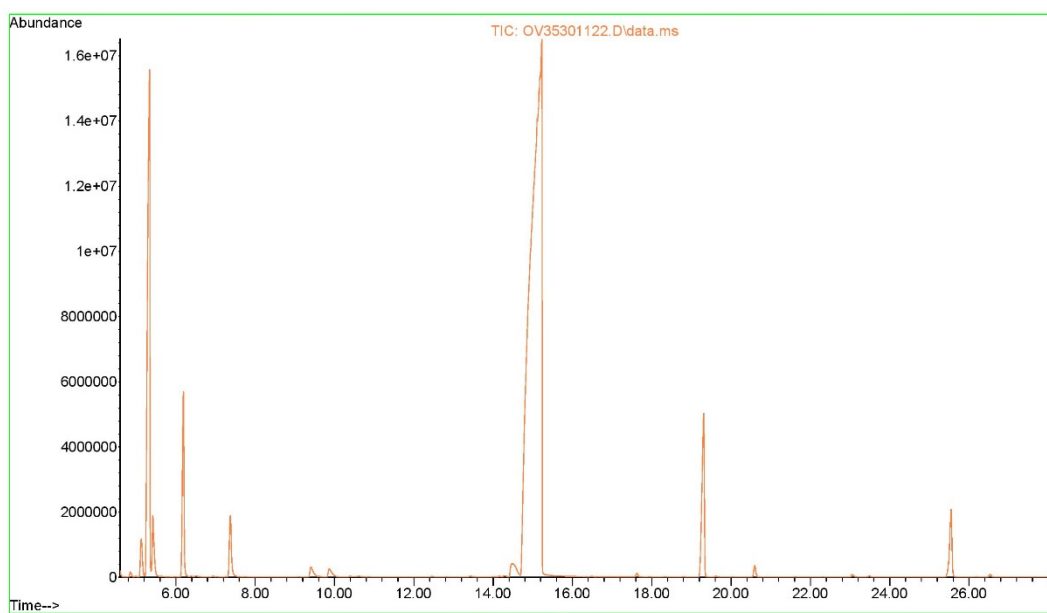

Figure 42 GC-MS chromatogram of *O. vulgare* after 20 days of storage

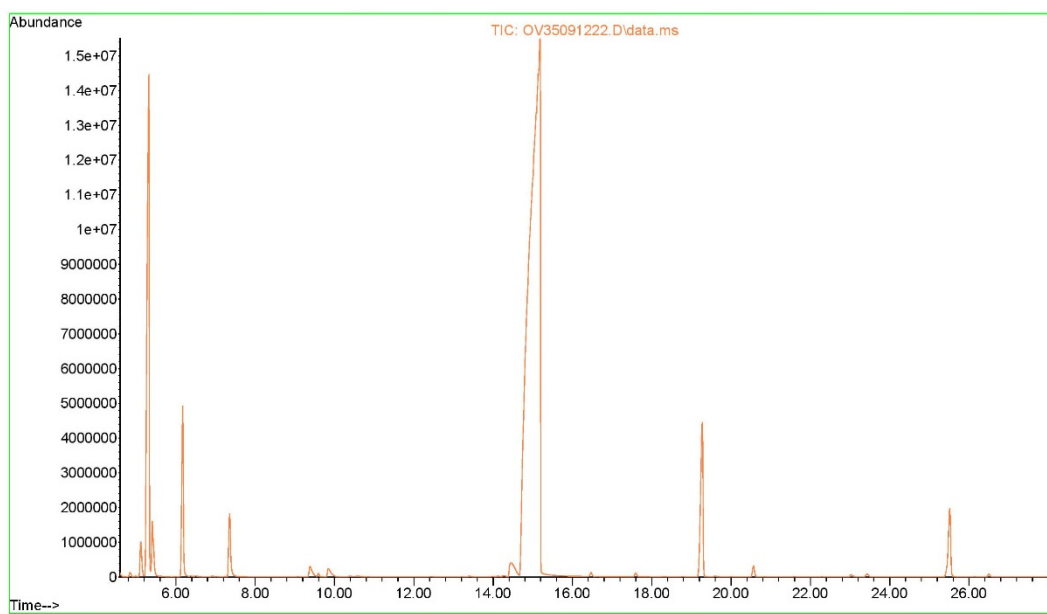

Figure 43 GC-MS chromatogram of *O. vulgare* after 30 days of storage

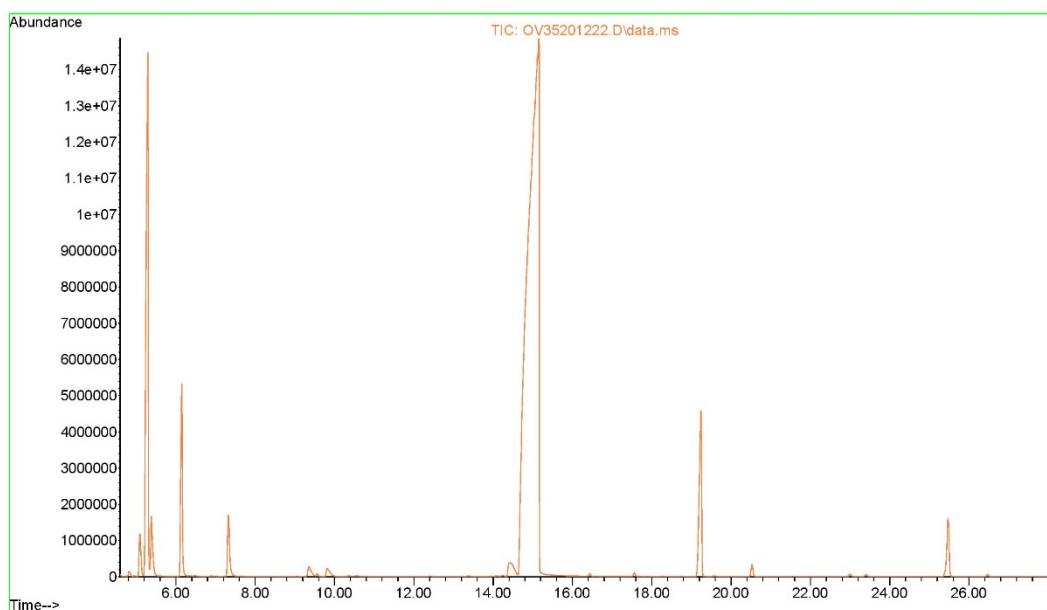

Figure 44 GC-MS chromatogram of *O. vulgare* after 40 days of storage

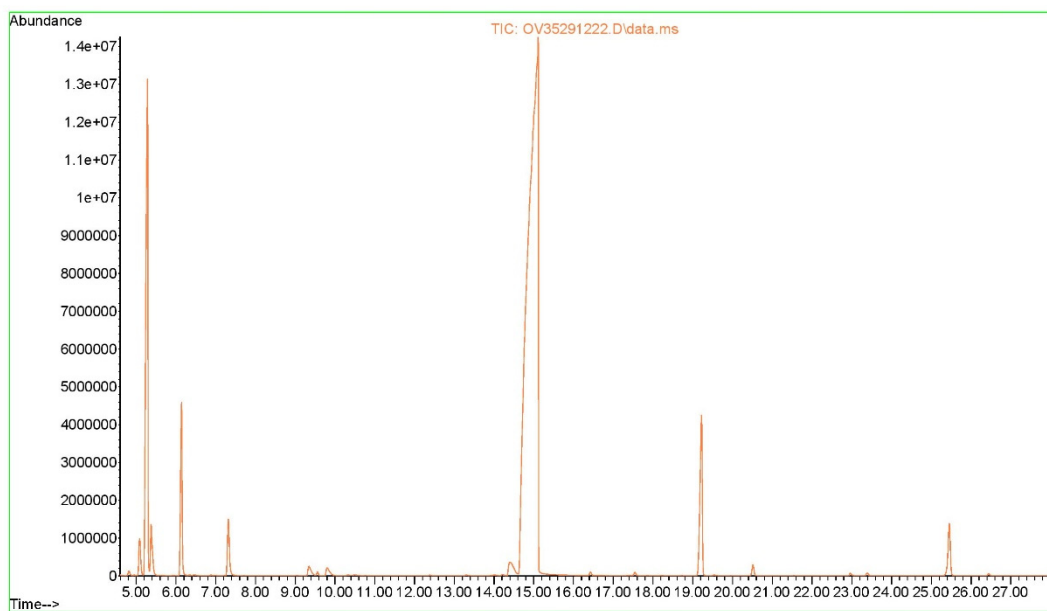

Figure 45 GC-MS chromatogram of *O. vulgare* after 50 days of storage

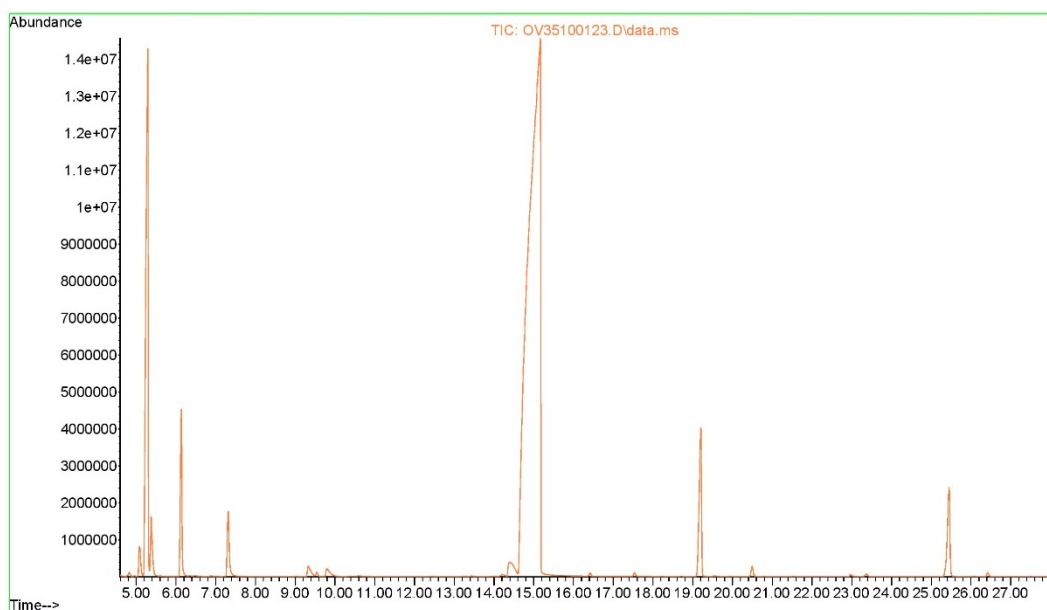

Figure 46 GC-MS chromatogram of *O. vulgare* after 60 days of storage

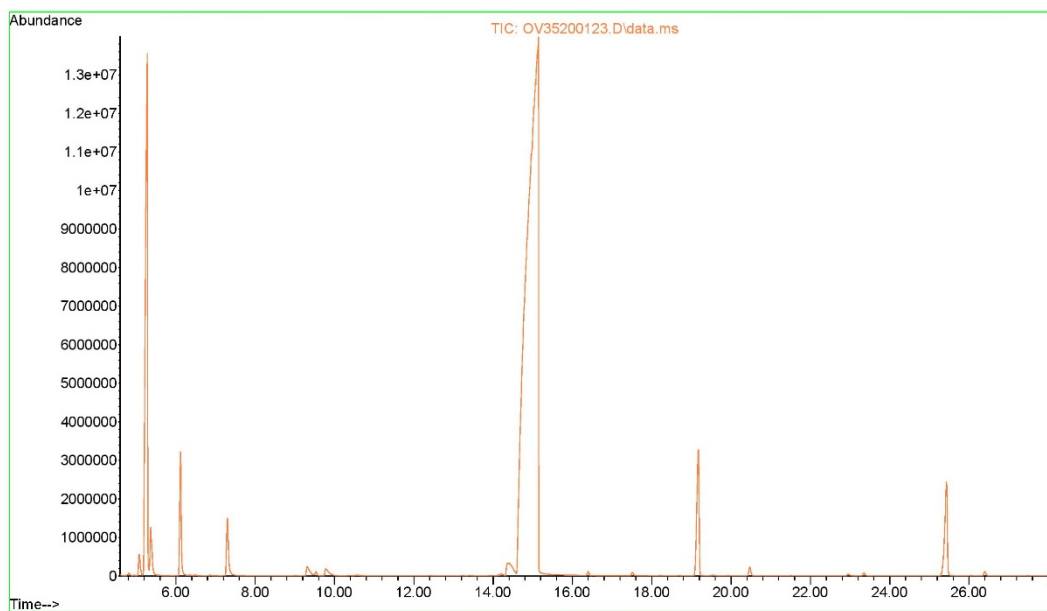

Figure 47 GC-MS chromatogram of *O. vulgare* after 70 days of storage

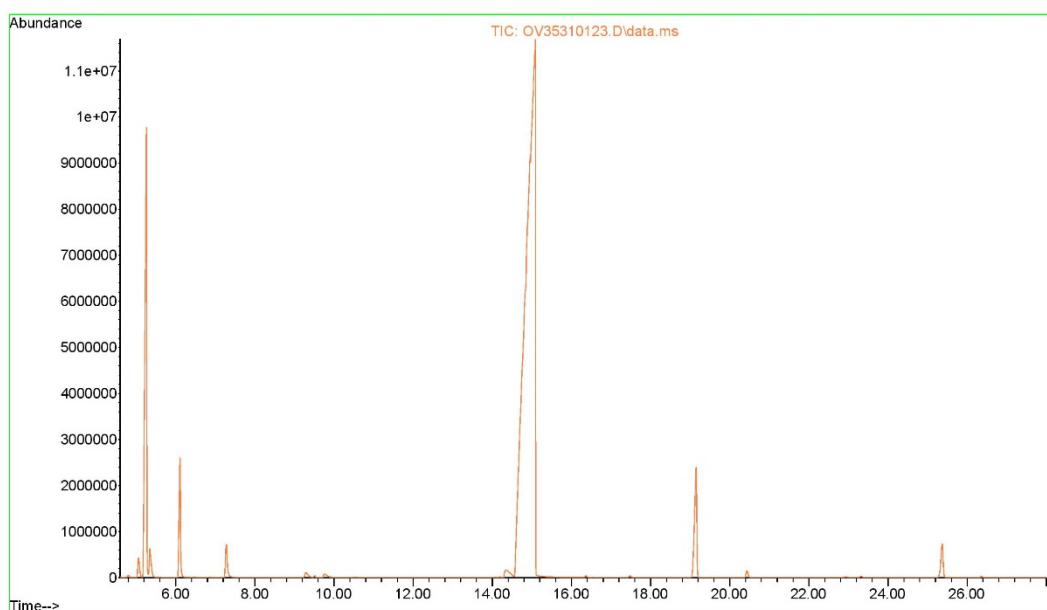

Figure 48 GC-MS chromatogram of *O. vulgare* after 80 days of storage

### 3.5. GC-MS chromatograms of the *O. vulgare* essential oil during storage in sealed glass ampoules at 45 °C for 3 months

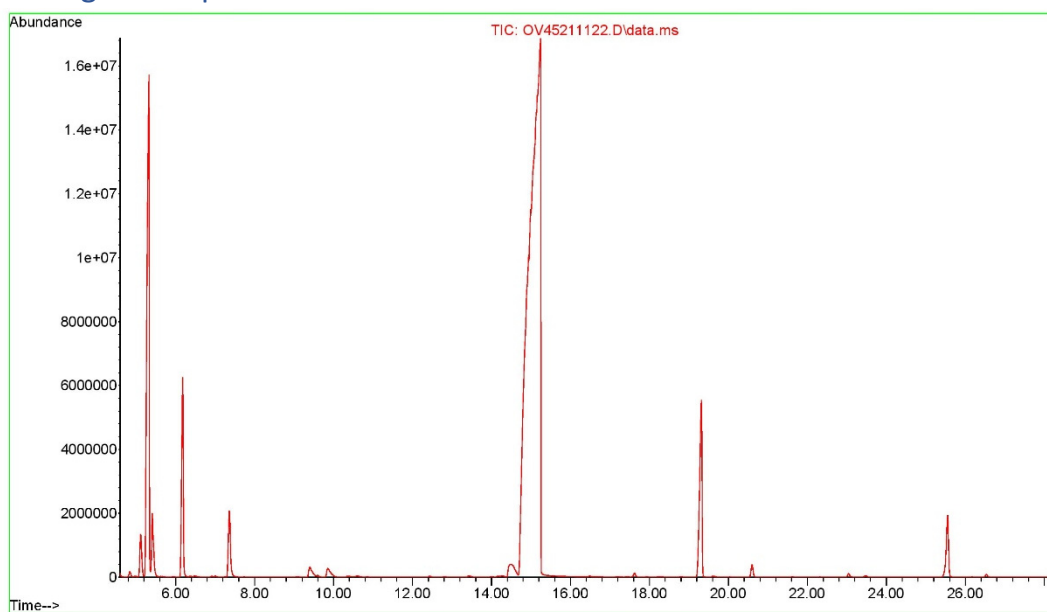

Figure 49 GC-MS chromatogram of *O. vulgare* after 10 days of storage

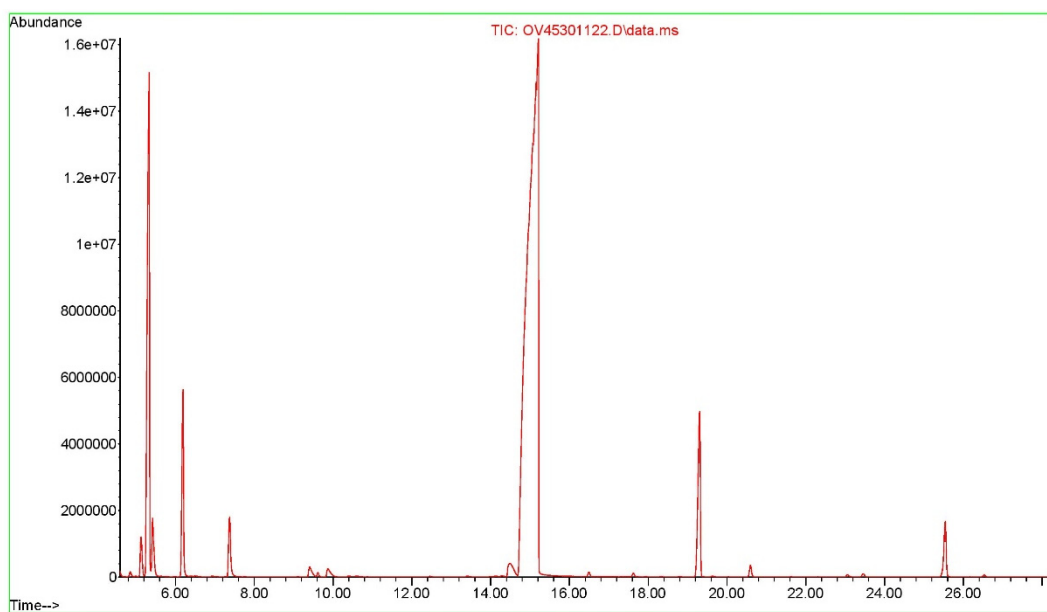

Figure 50 GC-MS chromatogram of *O. vulgare* after 20 days of storage

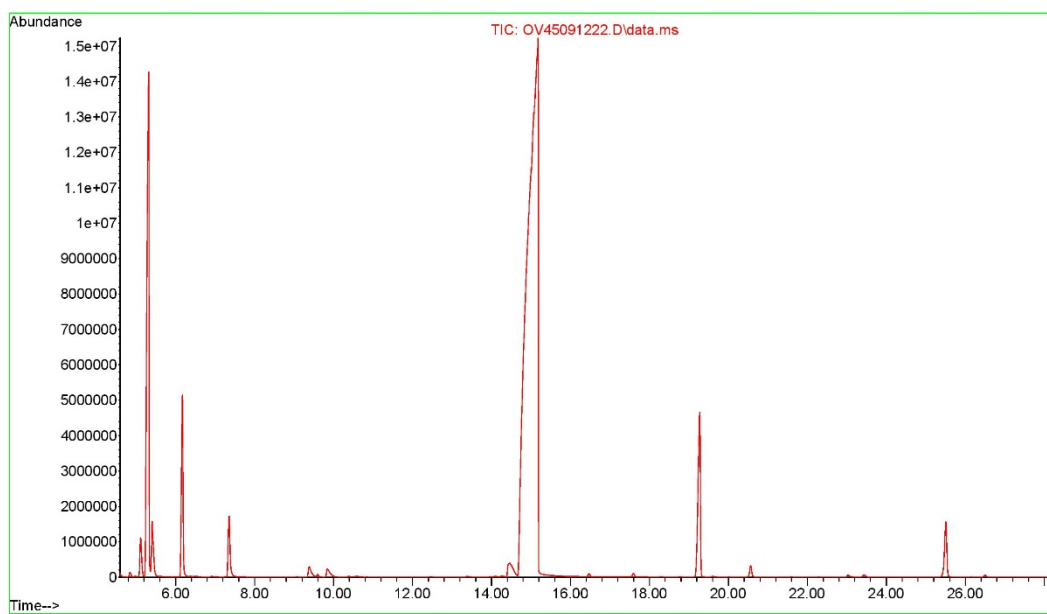

Figure 51 GC-MS chromatogram of *O. vulgare* after 30 days of storage

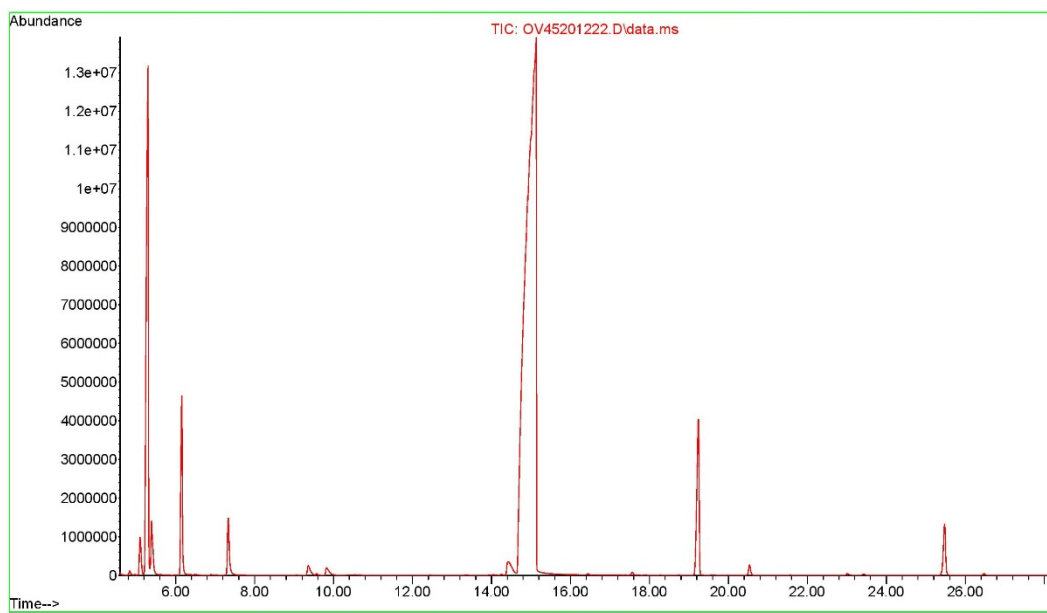

Figure 52 GC-MS chromatogram of *O. vulgare* after 40 days of storage

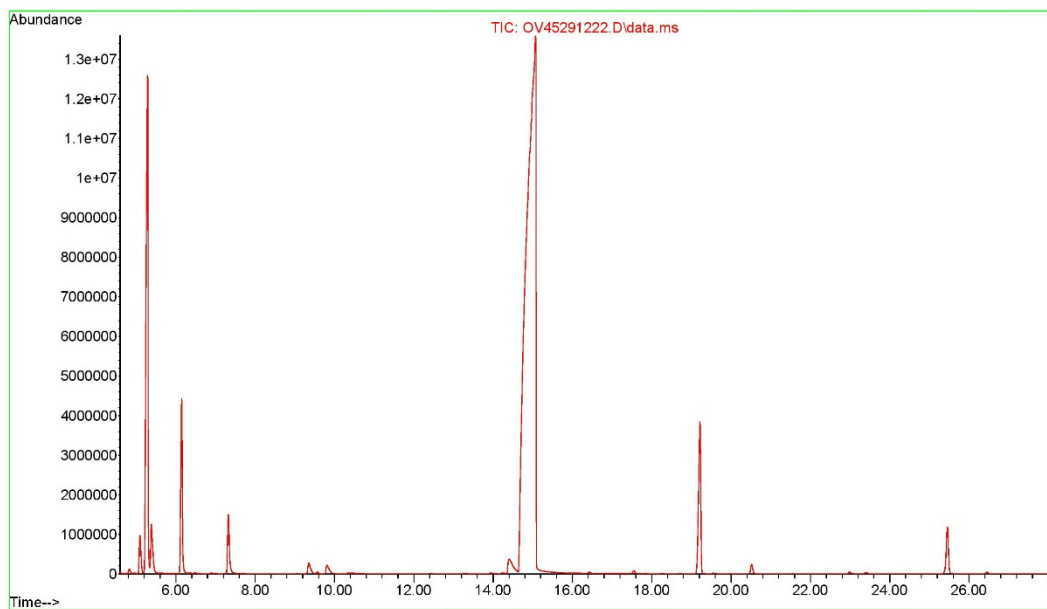

Figure 53 GC-MS chromatogram of *O. vulgare* after 50 days of storage

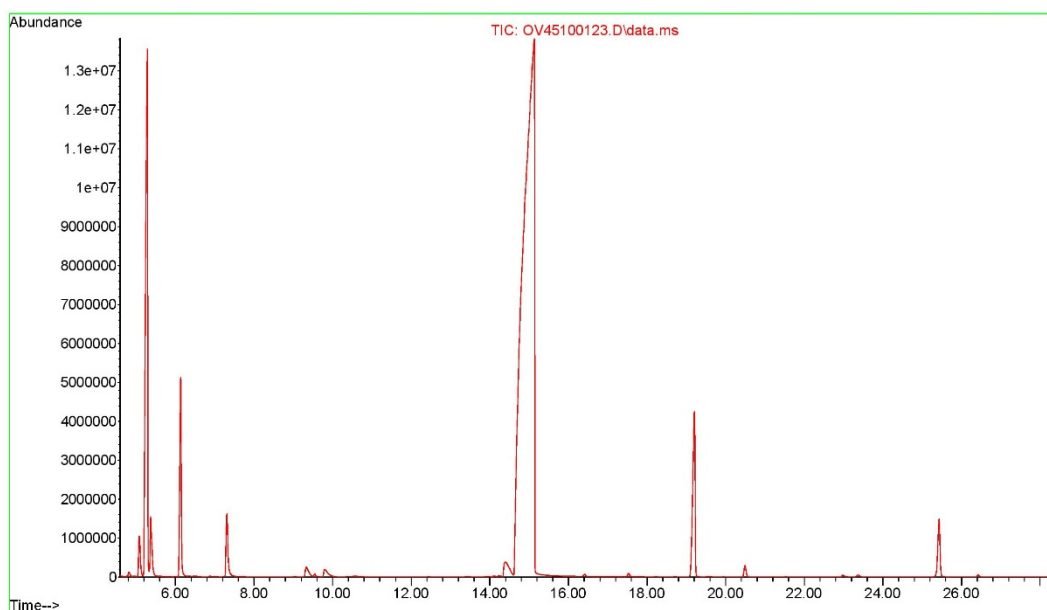

Figure 54 GC-MS chromatogram of *O. vulgare* after 60 days of storage

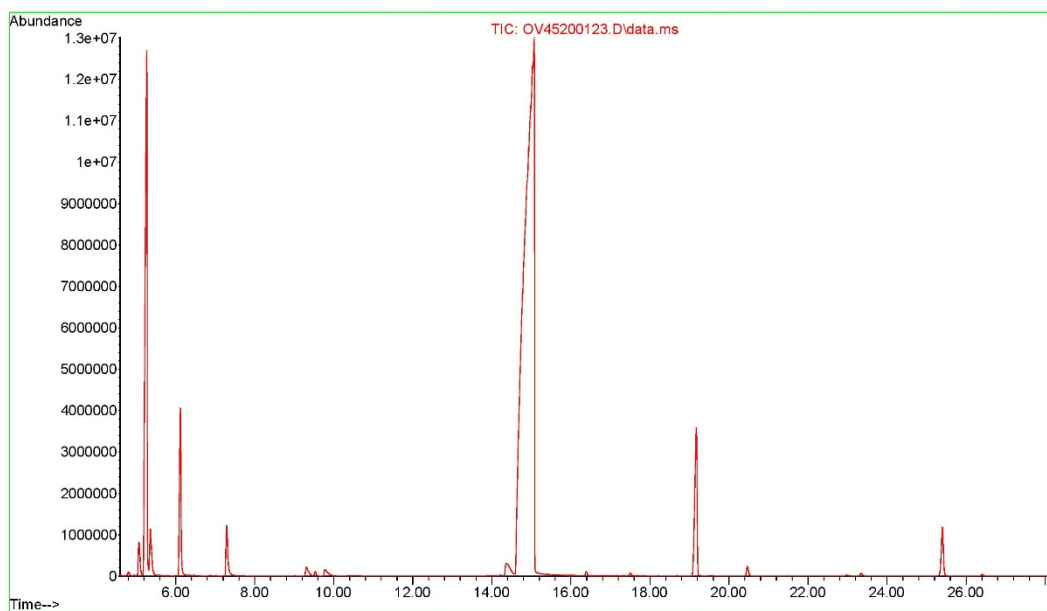

Figure 55 GC-MS chromatogram of *O. vulgare* after 70 days of storage

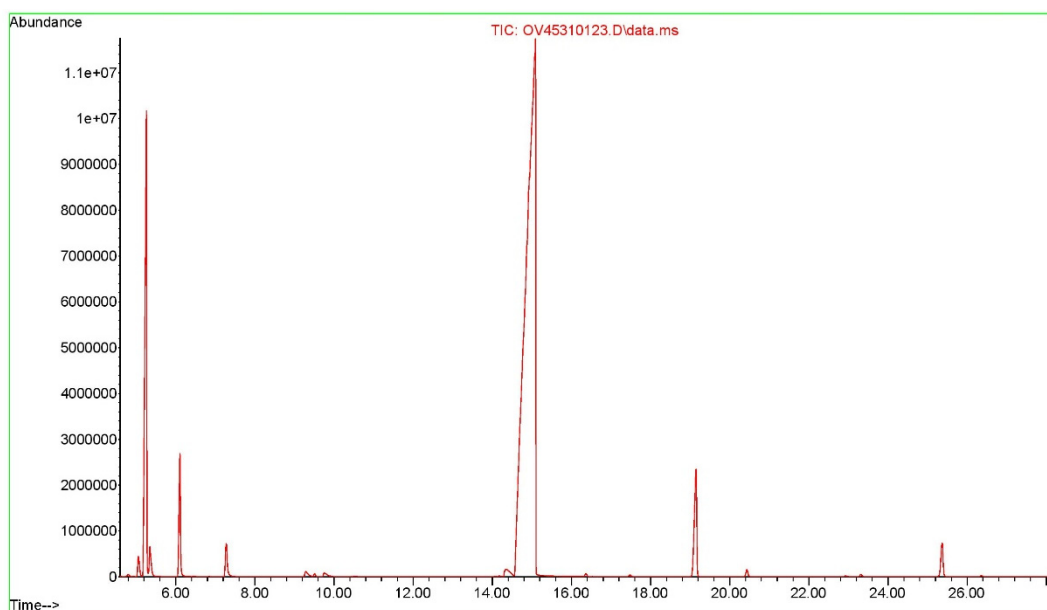

Figure 56 GC-MS chromatogram of *O. vulgare* after 80 days of storage

### 3.6. GC-MS chromatograms of the *O. vulgare* essential oil during storage in glass tubes sealed with cap at 35 °C for 3 months

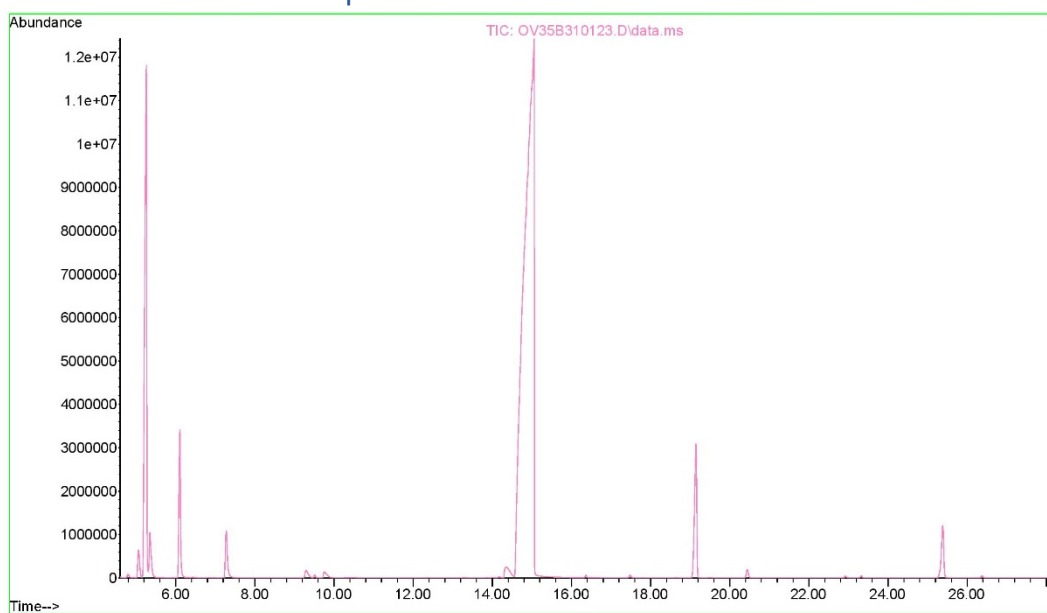

Figure 57 GC-MS chromatogram of *O. vulgare* after 10 days of storage

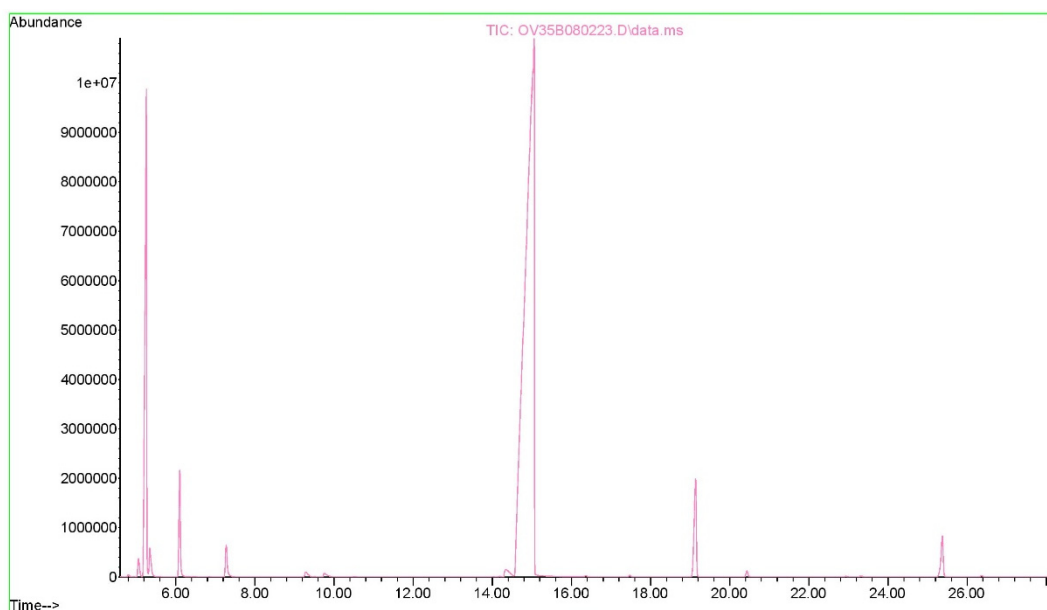

Figure 58 GC-MS chromatogram of *O. vulgare* after 20 days of storage

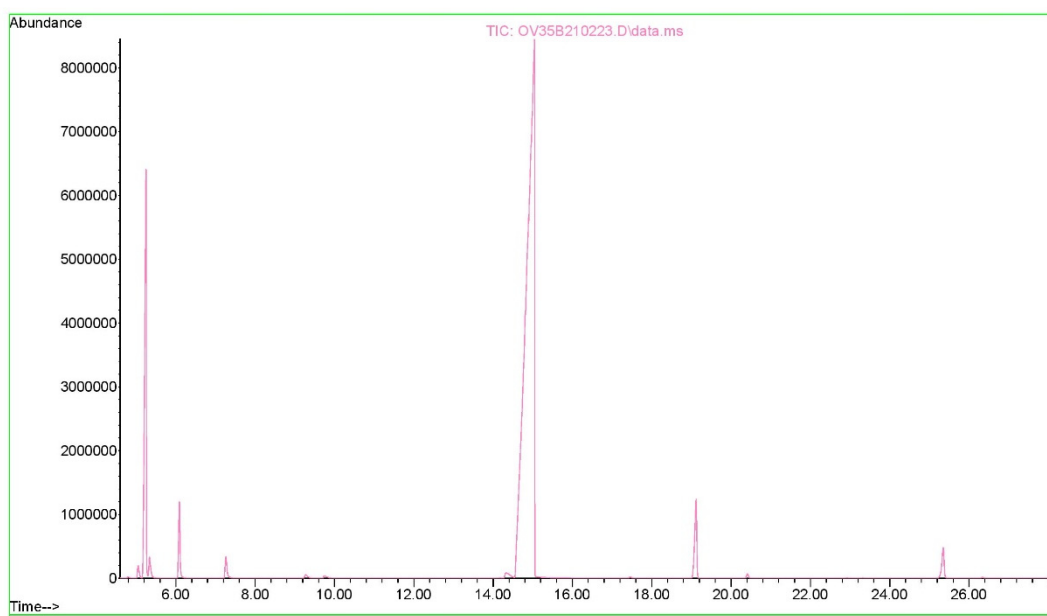

Figure 59 GC-MS chromatogram of *O. vulgare* after 30 days of storage

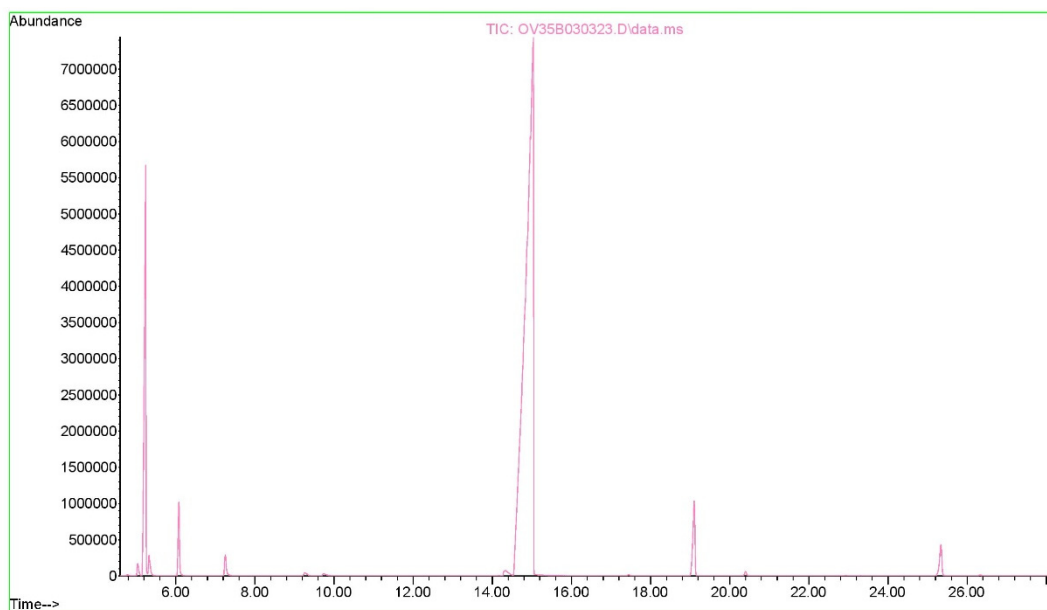

Figure 60 GC-MS chromatogram of *O. vulgare* after 40 days of storage

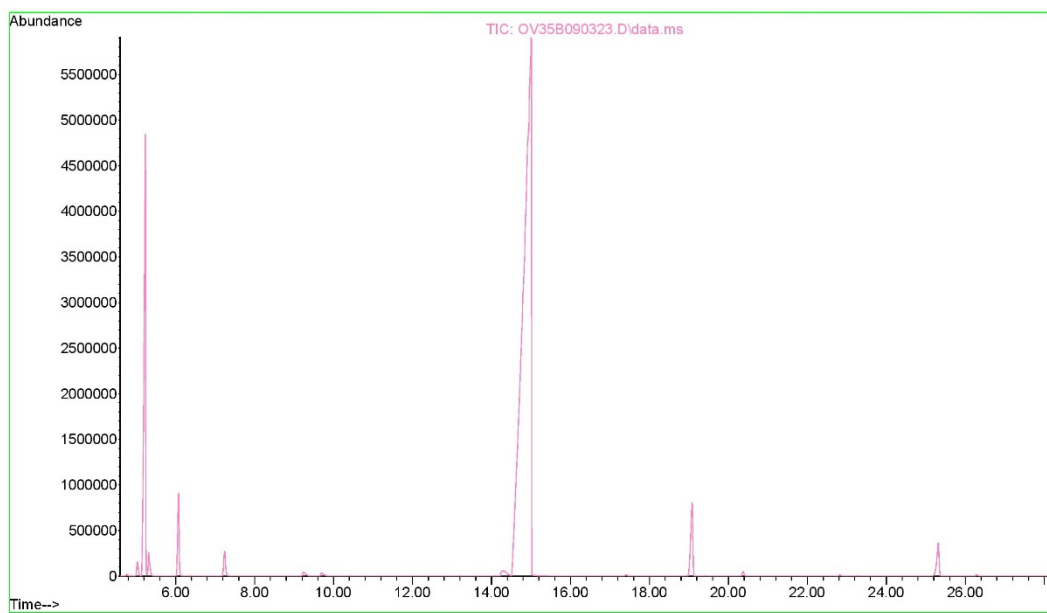

Figure 61 GC-MS chromatogram of *O. vulgare* after 50 days of storage

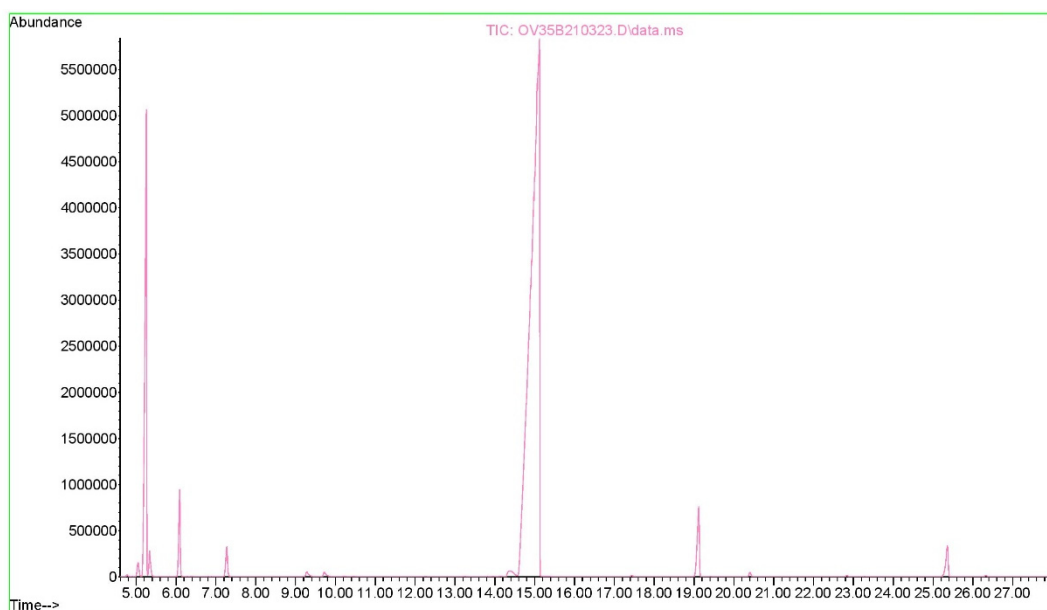

Figure 62 GC-MS chromatogram of *O. vulgare* after 60 days of storage

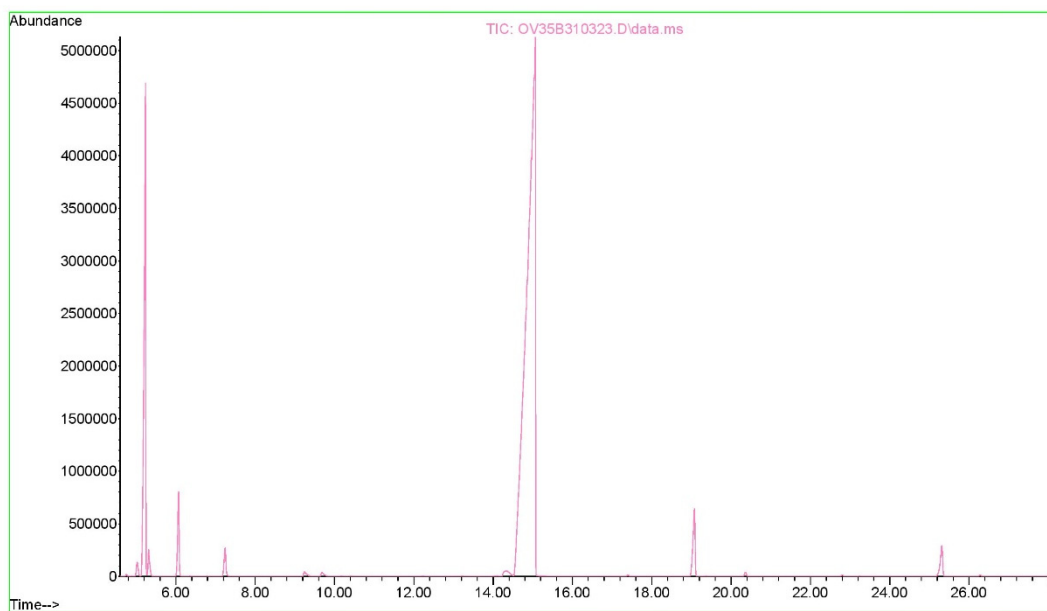

Figure 63 GC-MS chromatogram of *O. vulgare* after 70 days of storage

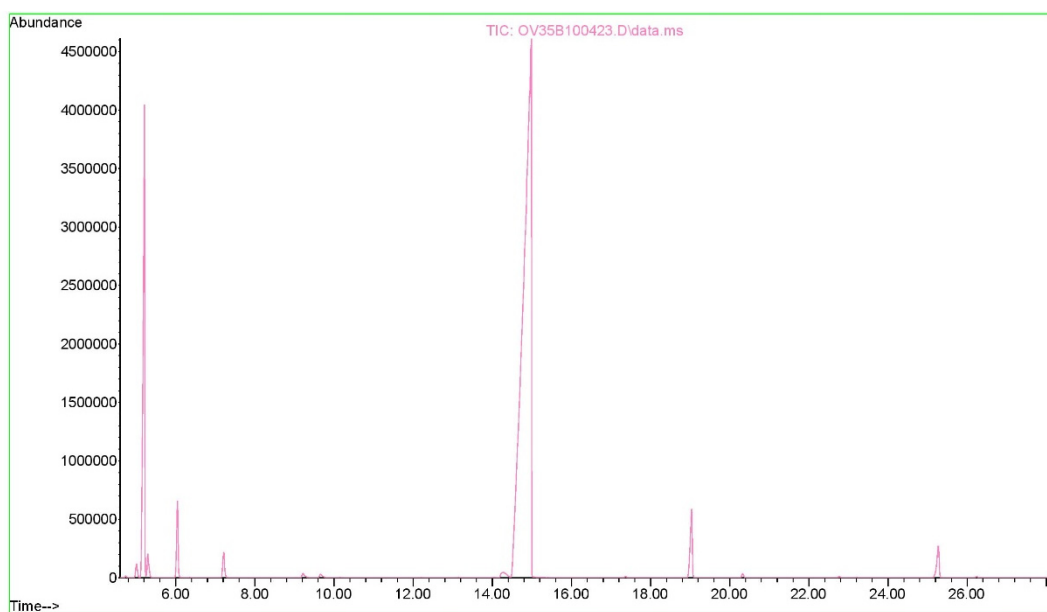

Figure 64 GC-MS chromatogram of *O. vulgare* after 80 days of storage

### 3.7. GC-MS chromatograms of the *O. vulgare* essential oil during storage in glass tubes sealed with cap at 45 °C for 3 months

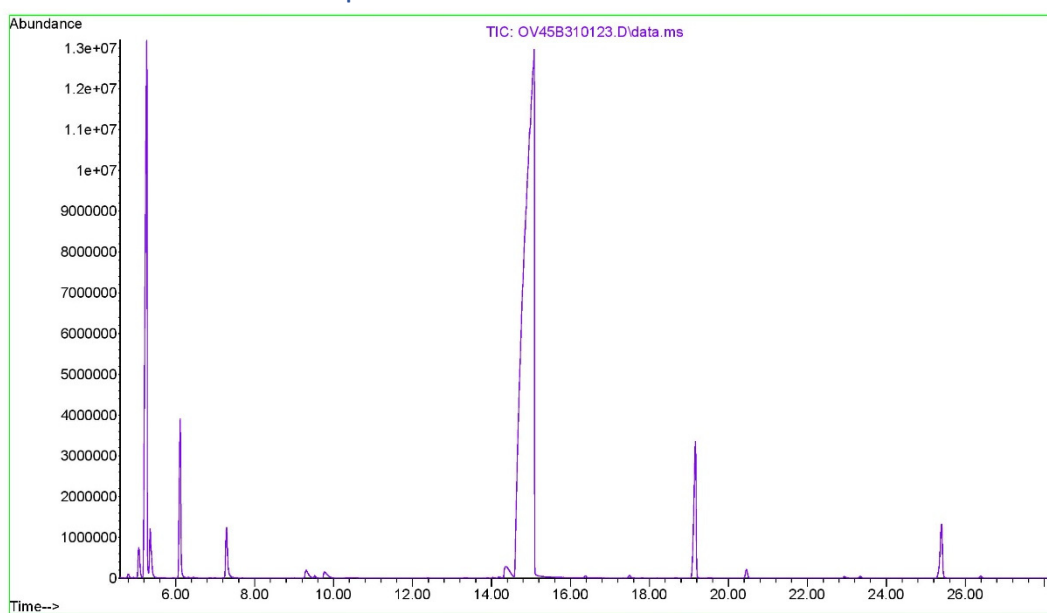

Figure 65 GC-MS chromatogram of *O. vulgare* after 10 days of storage

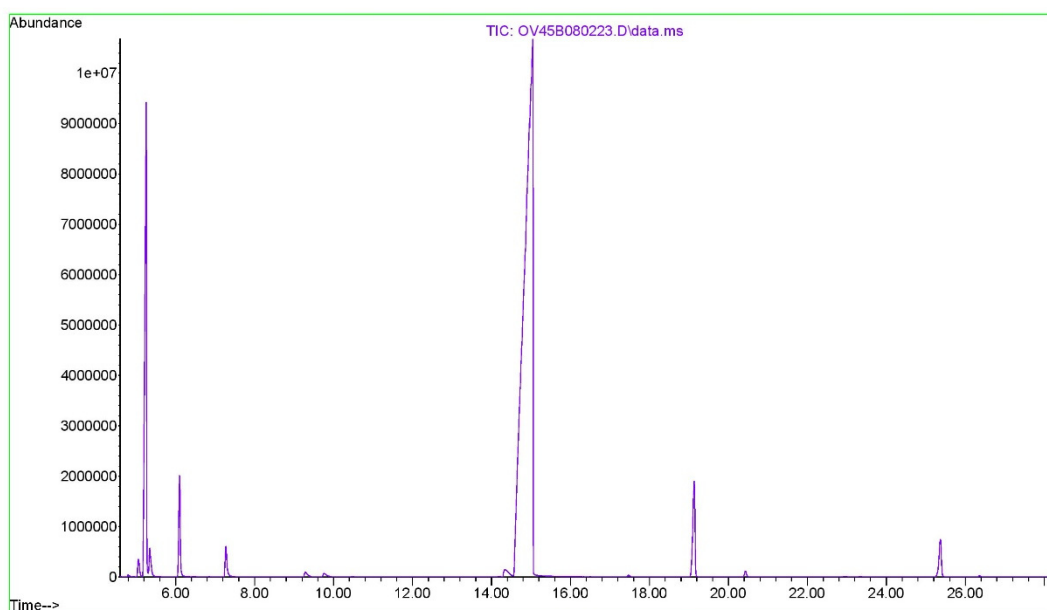

Figure 66 GC-MS chromatogram of *O. vulgare* after 20 days of storage

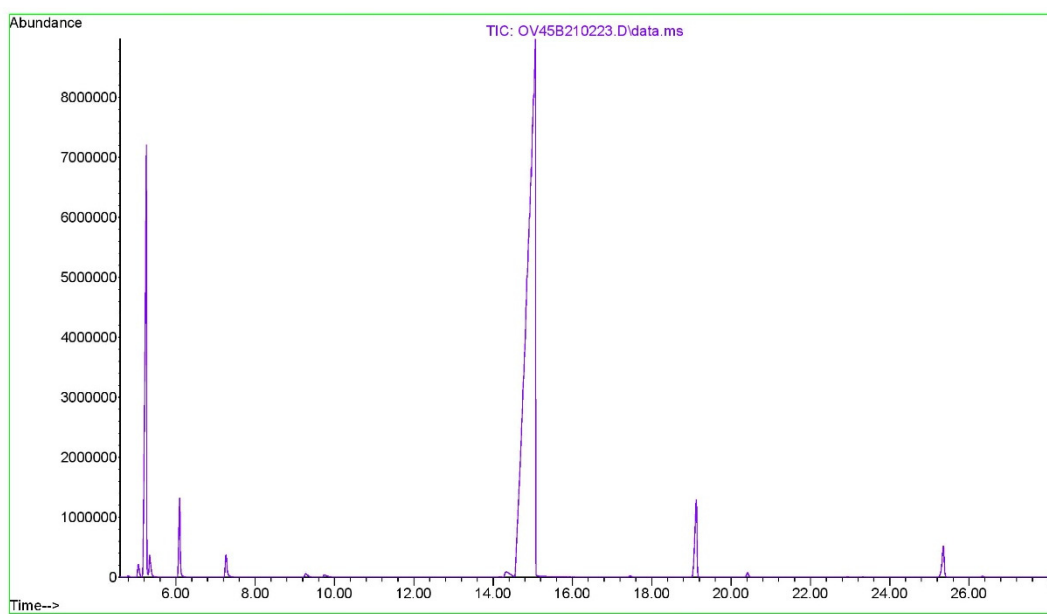

Figure 67 GC-MS chromatogram of *O. vulgare* after 30 days of storage

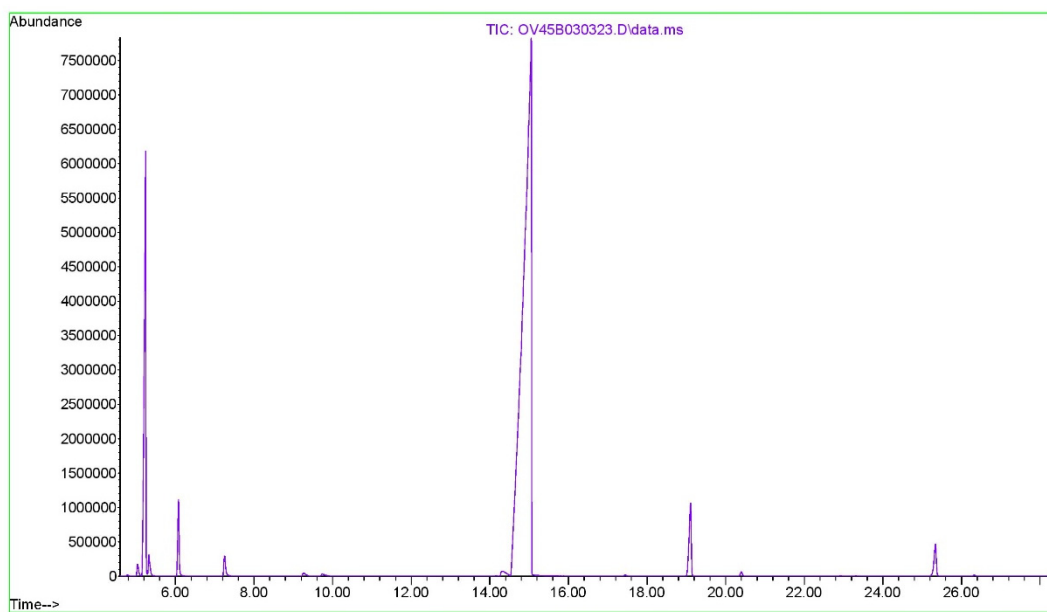

Figure 68 GC-MS chromatogram of *O. vulgare* after 40 days of storage

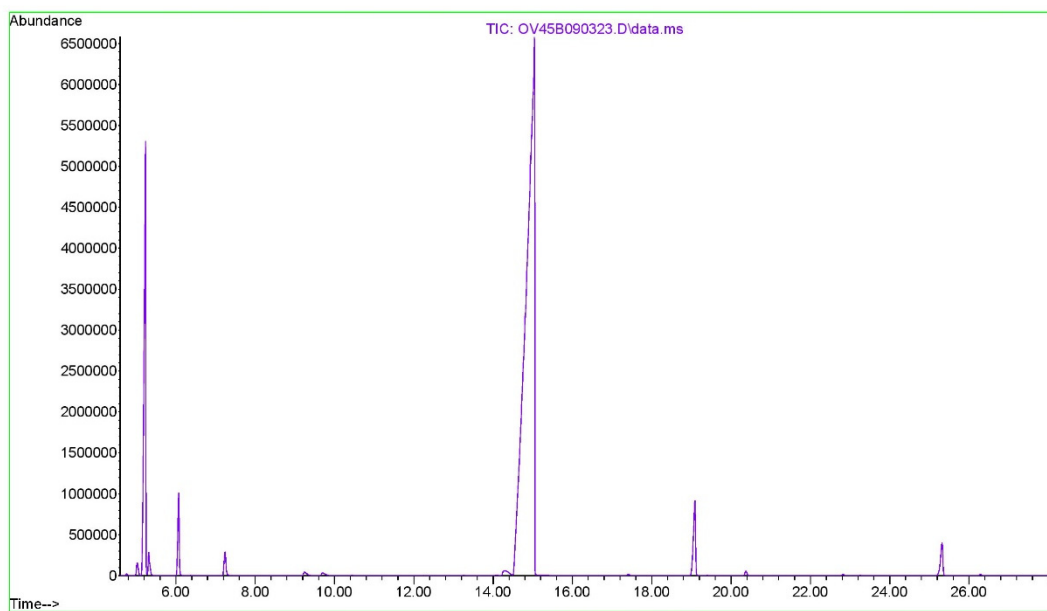

Figure 69 GC-MS chromatogram of *O. vulgare* after 50 days of storage

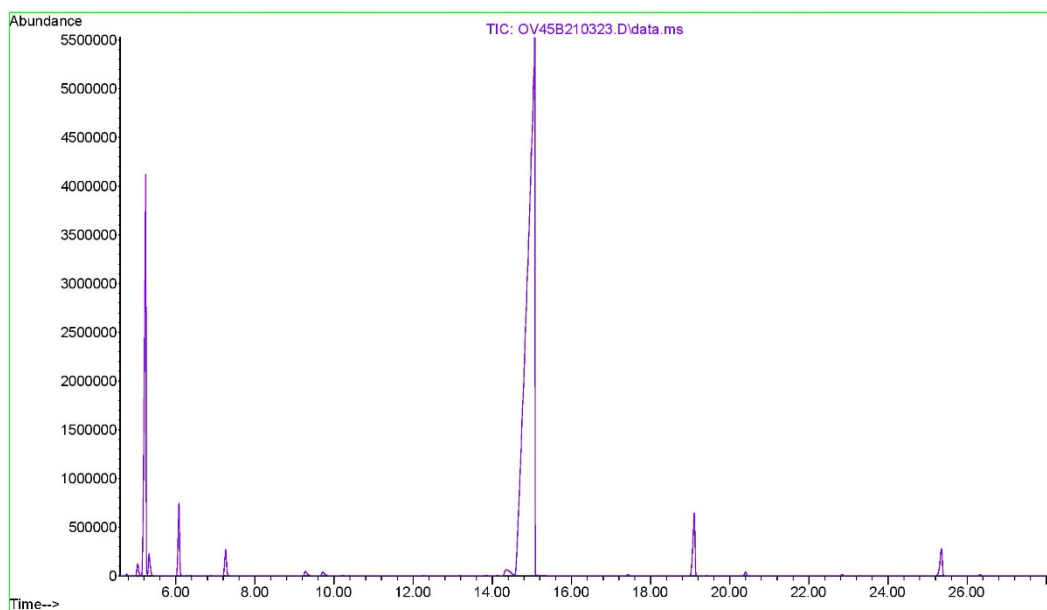

Figure 70 GC-MS chromatogram of *O. vulgare* after 60 days of storage

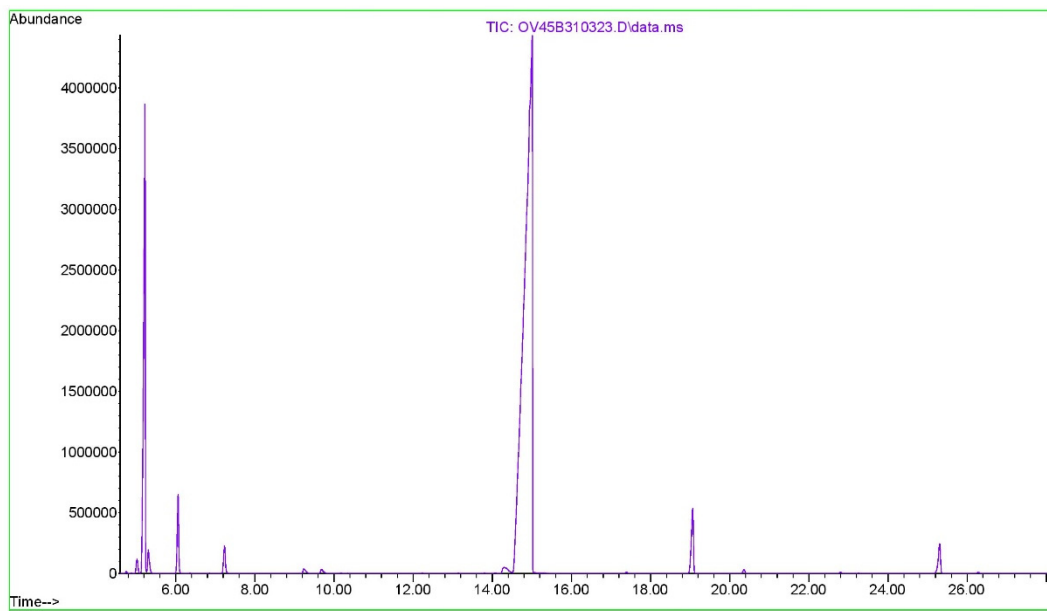

Figure 71 GC-MS chromatogram of *O. vulgare* after 70 days of storage

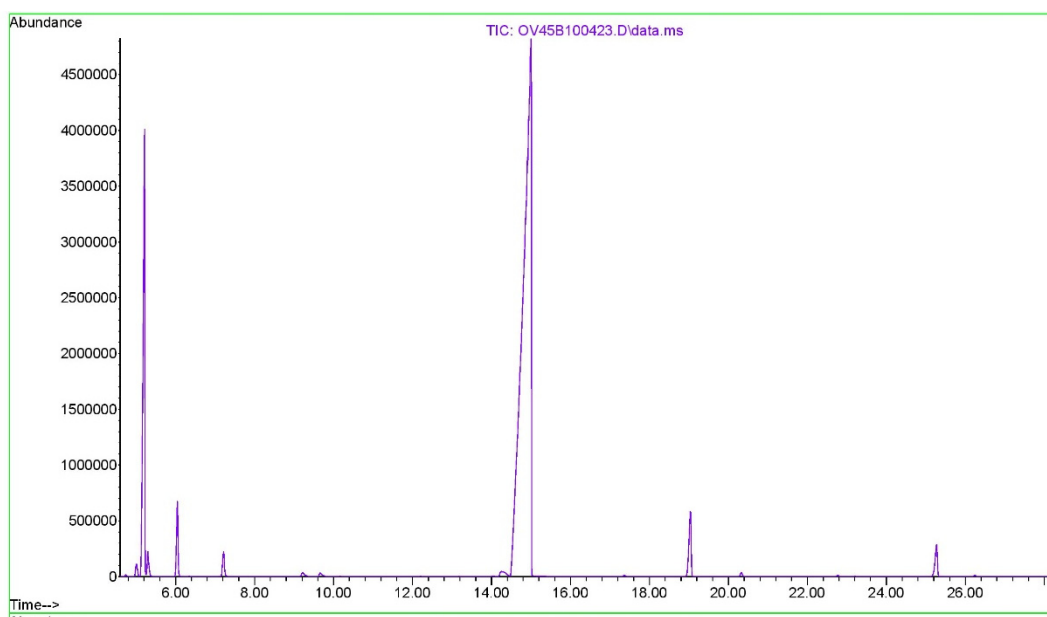

Figure 72 GC-MS chromatogram of *O. vulgare* after 80 days of storage

### 3.8. GC-MS chromatograms of the *O. vulgare* essential oil during storage in glass tubes sealed with cap at 4 °C for 6 months

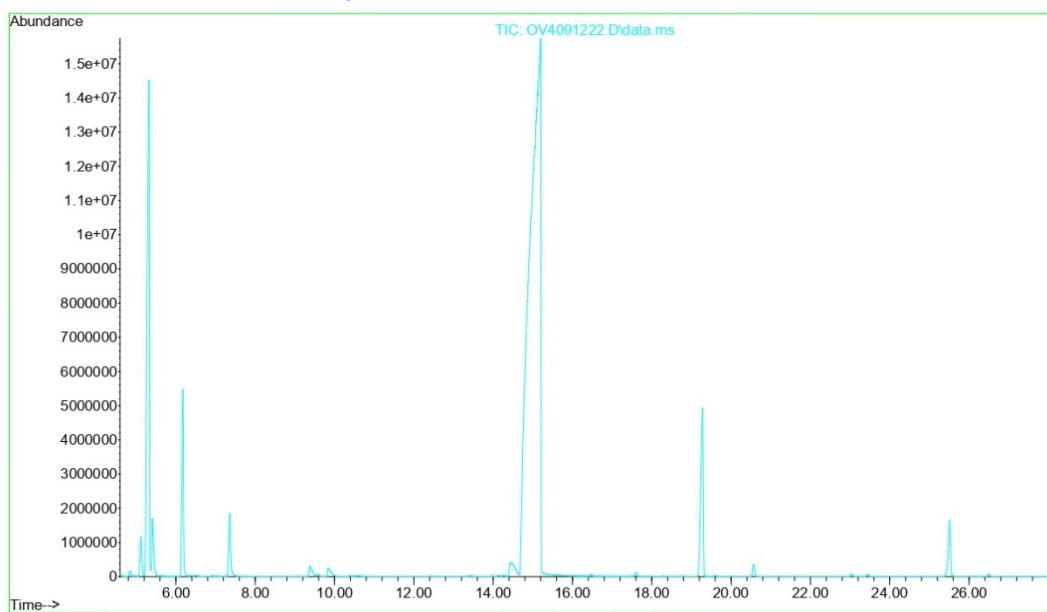

Figure 73 GC-MS chromatogram of *O. vulgare* after 30 days of storage

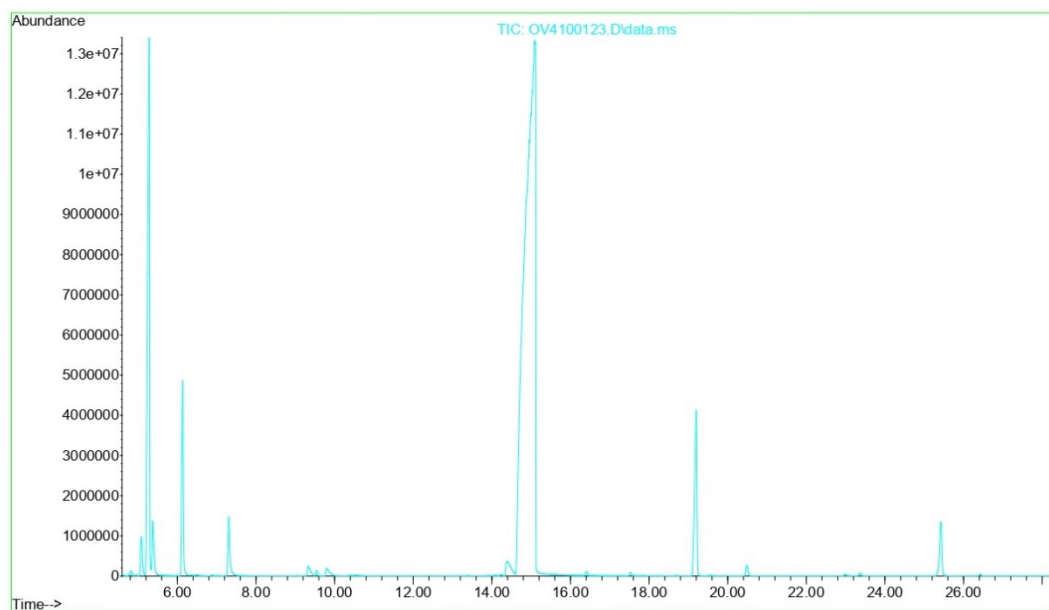

Figure 74 GC-MS chromatogram of *O. vulgare* after 60 days of storage

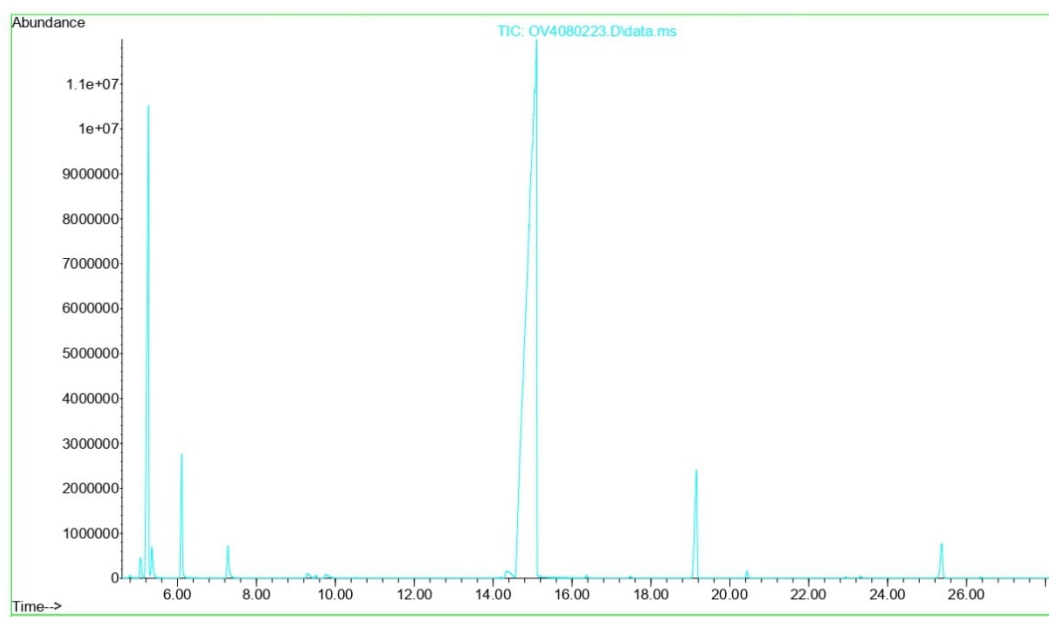

Figure 75 GC-MS chromatogram of *O. vulgare* after 90 days of storage

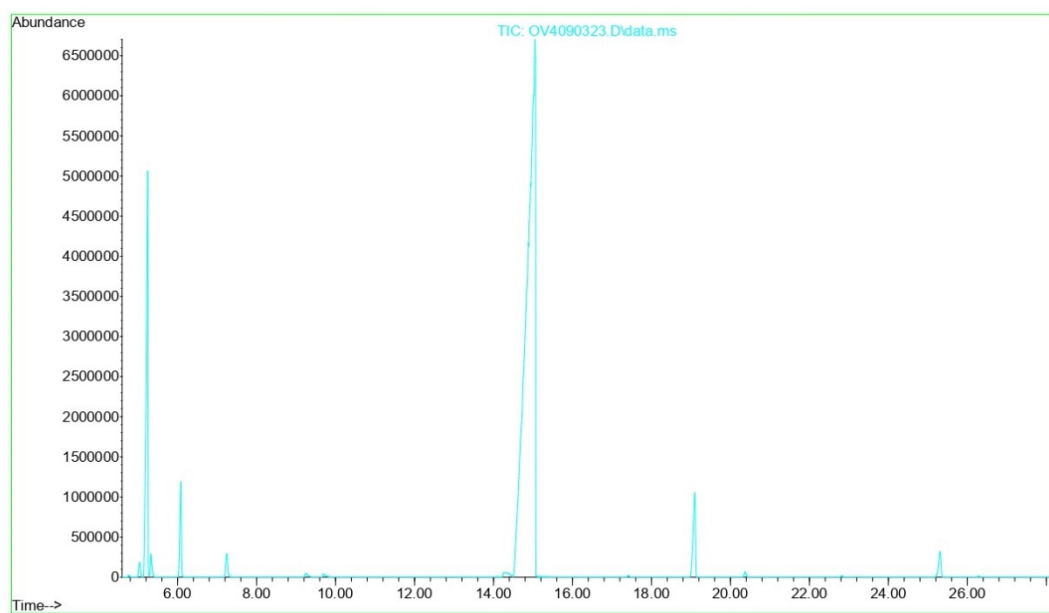

Figure 76 GC-MS chromatogram of *O. vulgare* after 120 days of storage

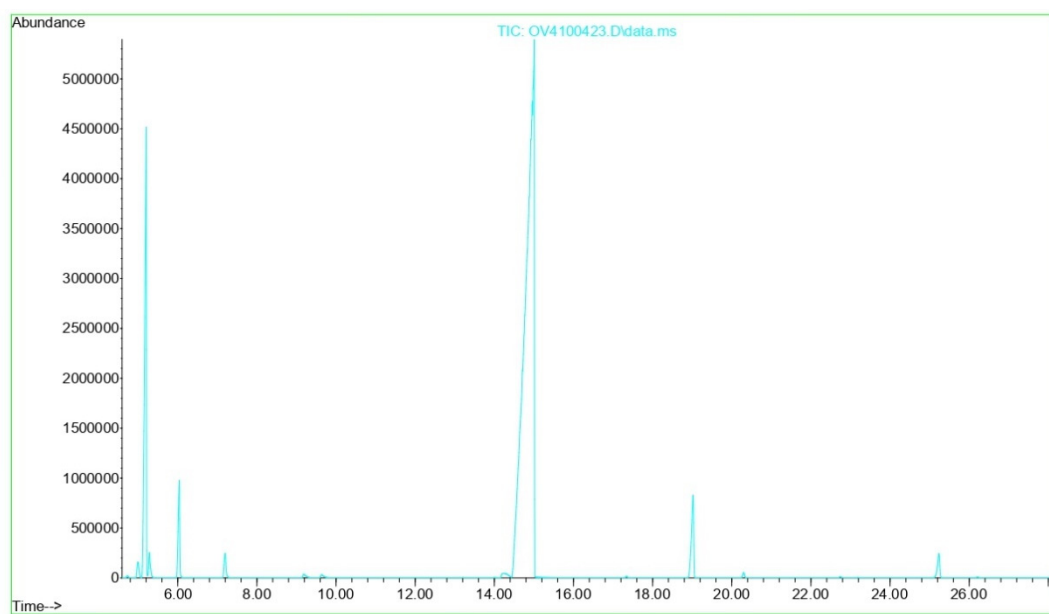

Figure 77 GC-MS chromatogram of *O. vulgare* after 150 days of storage

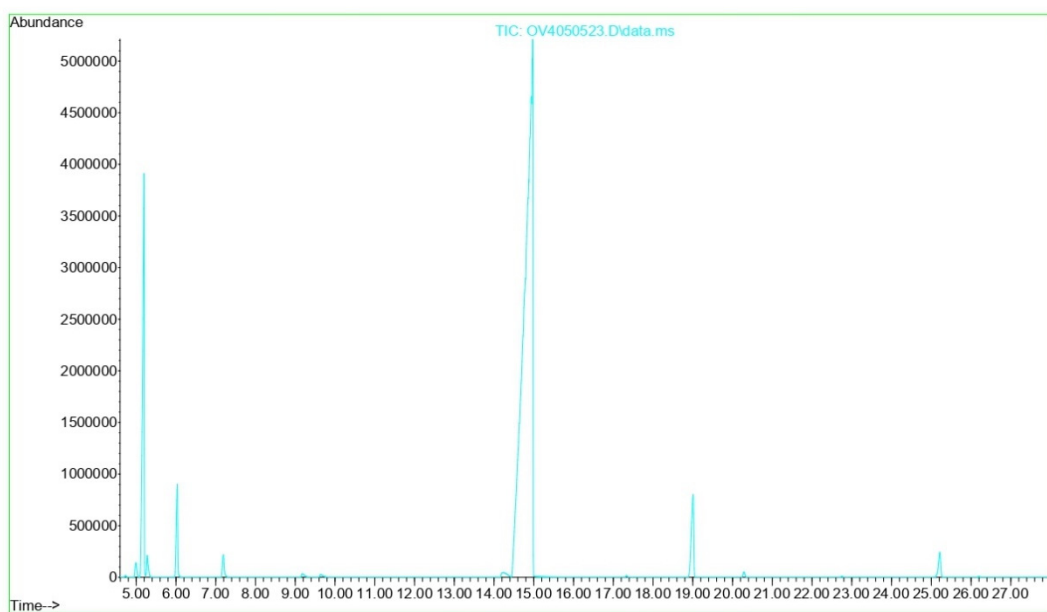

Figure 78 GC-MS chromatogram of *O. vulgare* after 180 days of storage

### 3.9. GC-MS chromatogram of the *O. vulgare* essential oil during storage in metal container at 4 °C for 6 months

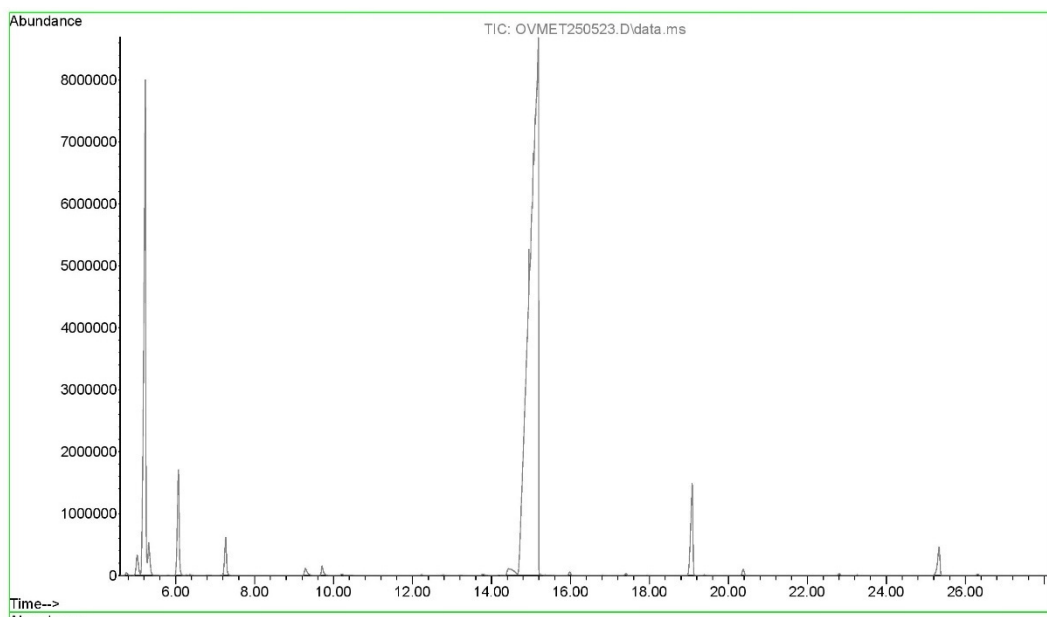

Figure 79 GC-MS chromatogram of *O. vulgare* after 180 days of storage

### 3.10. GC-MS chromatogram of the *O. vulgare* essential oil during storage in sealed glass ampoules at 4 °C for 6 months

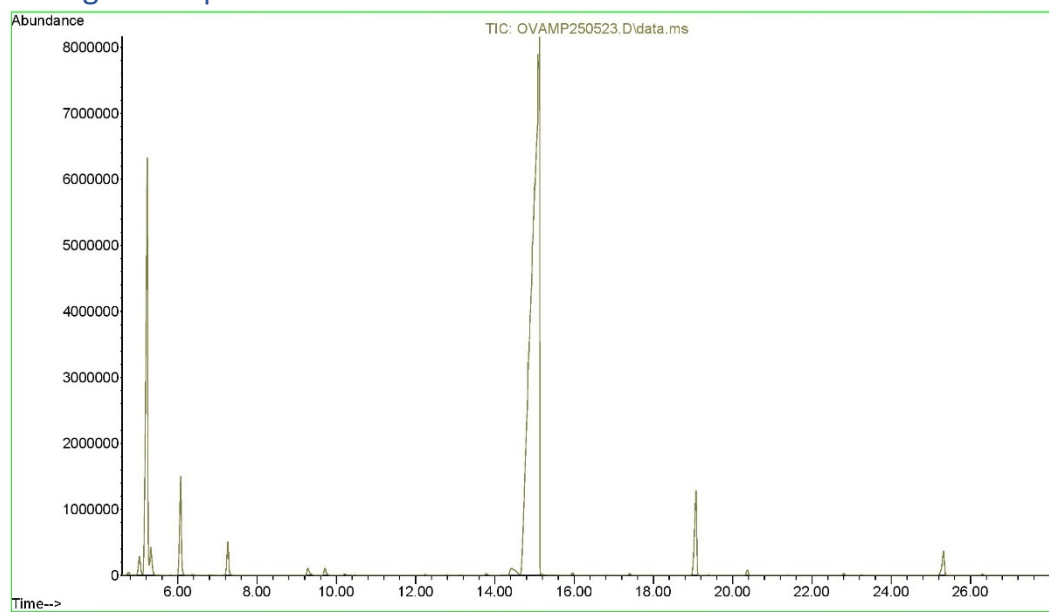

Figure 80 GC-MS chromatogram of *O. vulgare* after 180 days of storage

### 3.11. GC-MS chromatogram of the *O. vulgare* essential oil during storage in glass tubes sealed with cap at -20 °C for 6 months

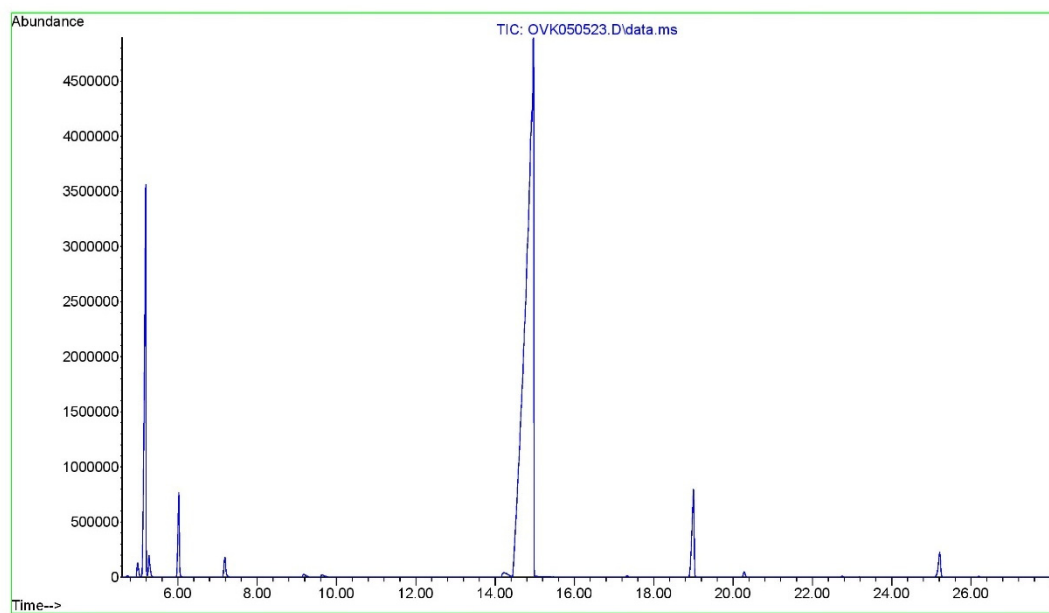

Figure 81 GC-MS chromatogram of *O. vulgare* after 180 days of storage

## 4. GC-MS chromatograms of the *Thymus vulgaris* L. essential oil

### 4.1. GC-MS chromatogram of the initial *T. vulgaris* essential oil

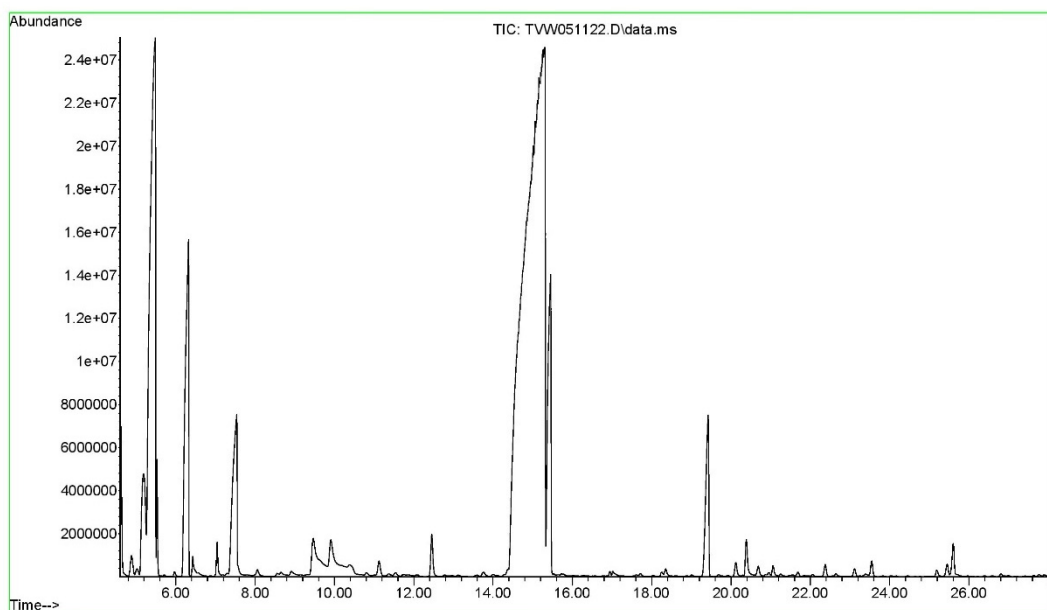

Figure 82 GC-MS chromatogram of *T. vulgaris* before storage

### 4.2. GC-MS chromatograms of the *T. vulgaris* essential oil during storage in glass tubes sealed with cap at room temperature (23 °C) under darkness for 6 months

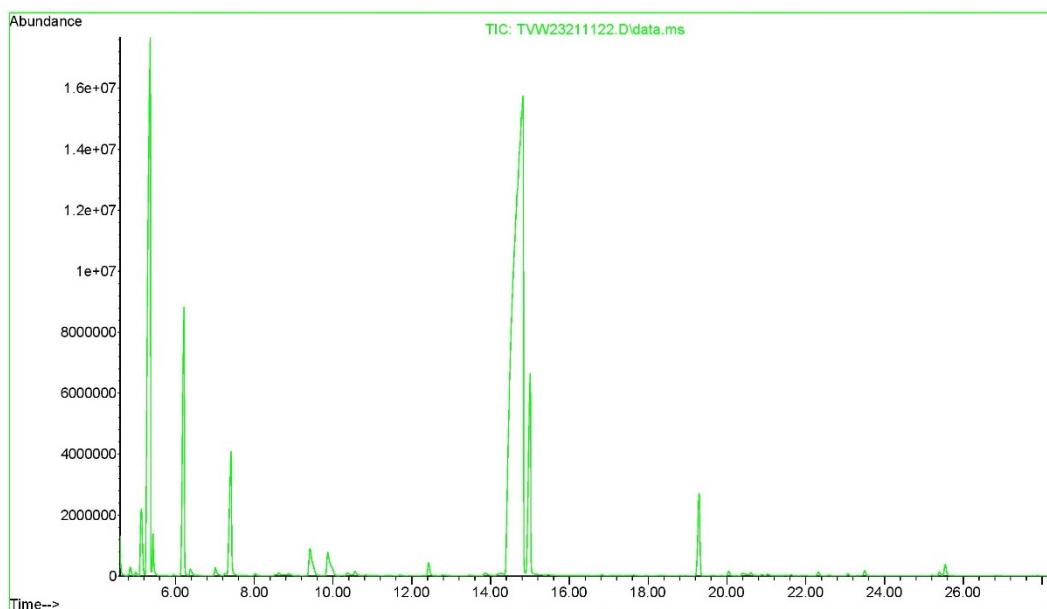

Figure 83 GC-MS chromatogram of *T. vulgaris* after 10 days of storage

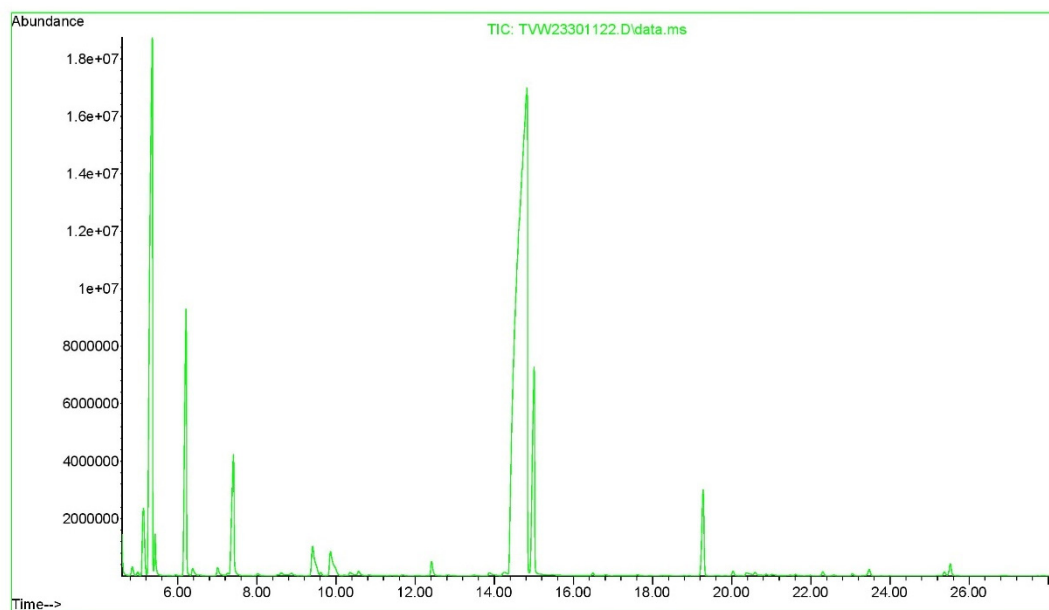

Figure 84 GC-MS chromatogram of *T. vulgaris* after 20 days of storage

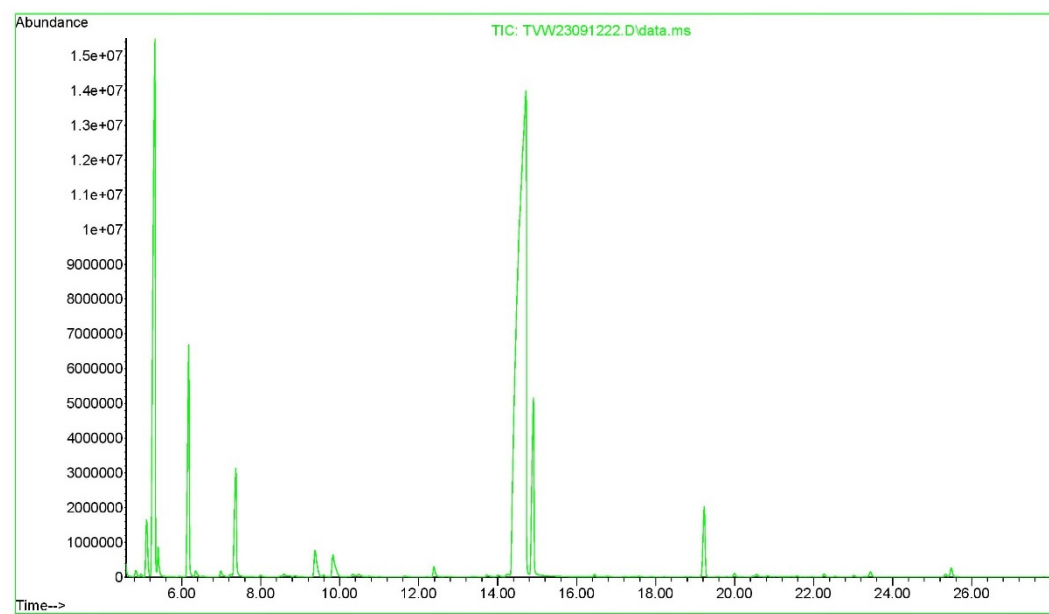

Figure 85 GC-MS chromatogram of *T. vulgaris* after 30 days of storage

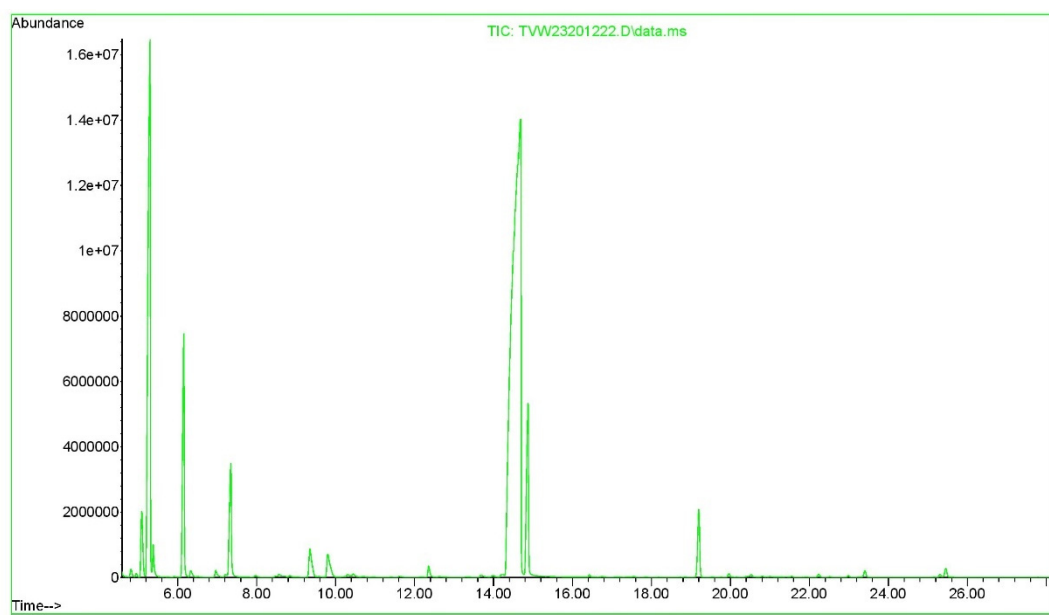

Figure 86 GC-MS chromatogram of *T. vulgaris* after 40 days of storage

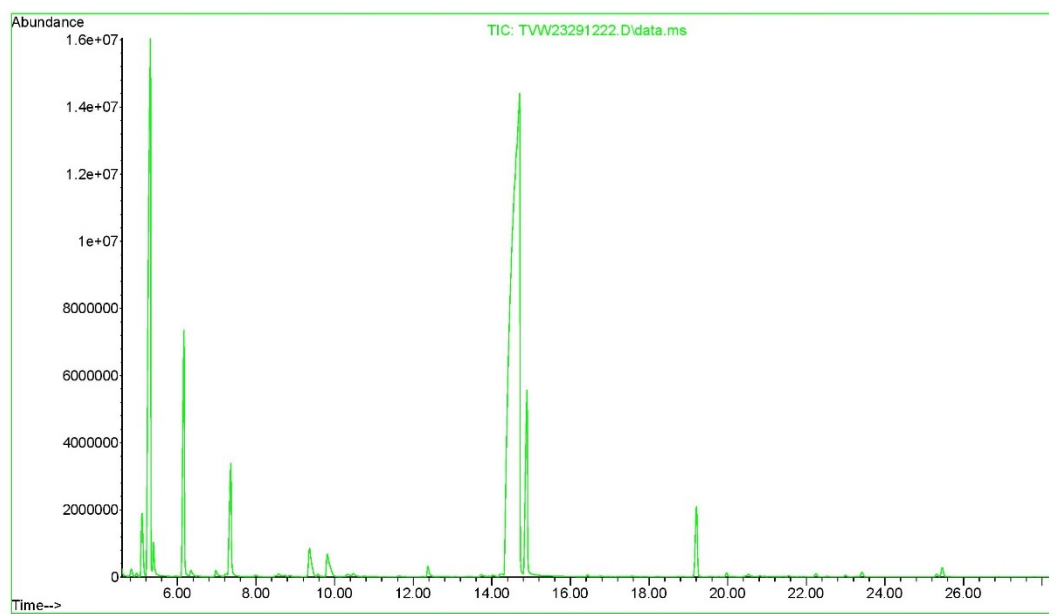

Figure 87 GC-MS chromatogram of *T. vulgaris* after 50 days of storage

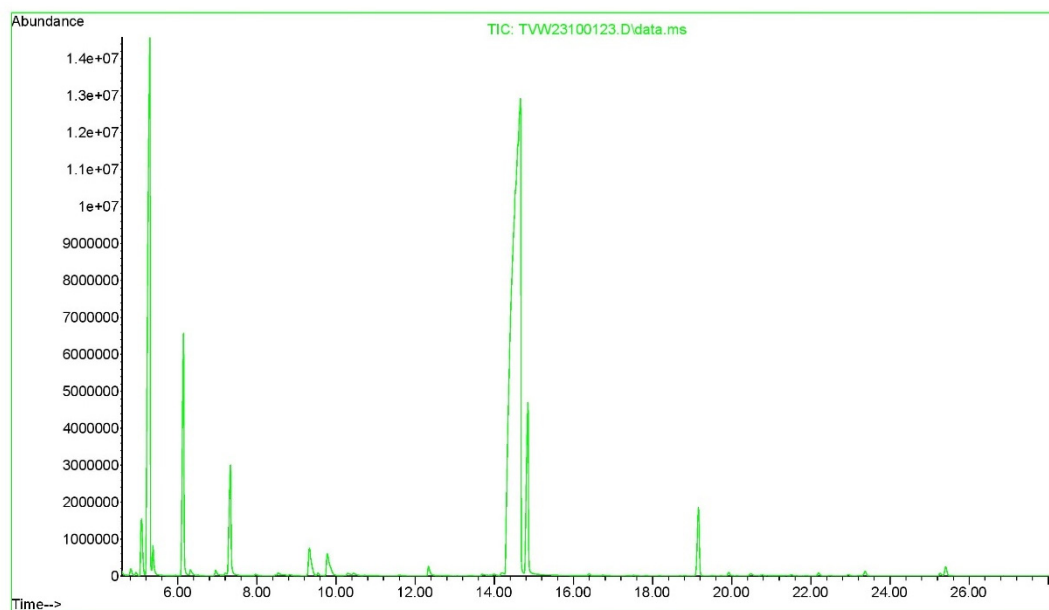

Figure 88 GC-MS chromatogram of *T. vulgaris* after 60 days of storage

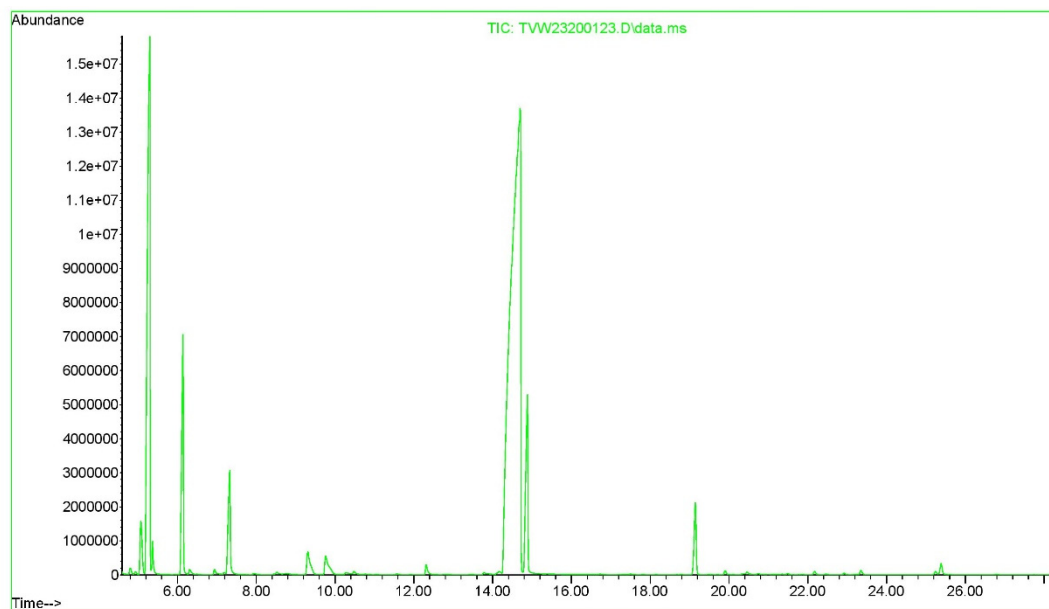

Figure 89 GC-MS chromatogram of *T. vulgaris* after 70 days of storage

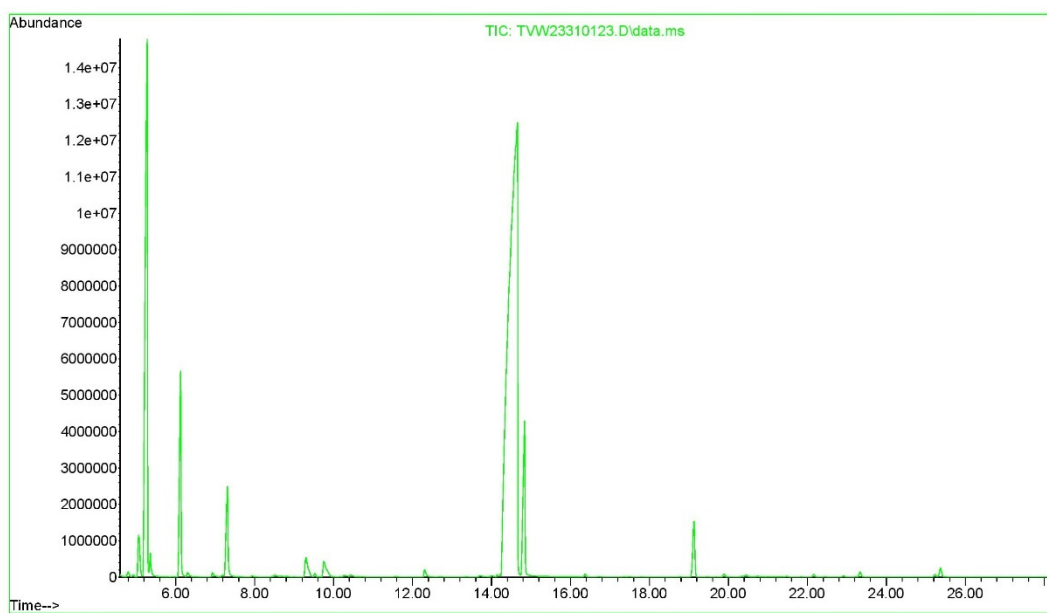

Figure 90 GC-MS chromatogram of *T. vulgaris* after 80 days of storage

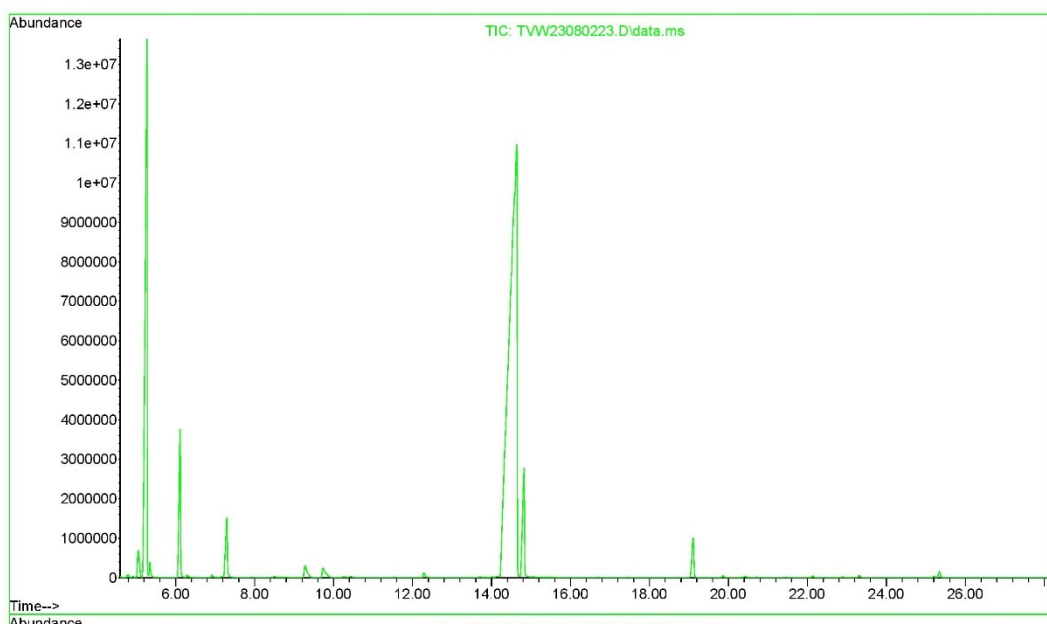

Figure 91 GC-MS chromatogram of *T. vulgaris* after 90 days of storage

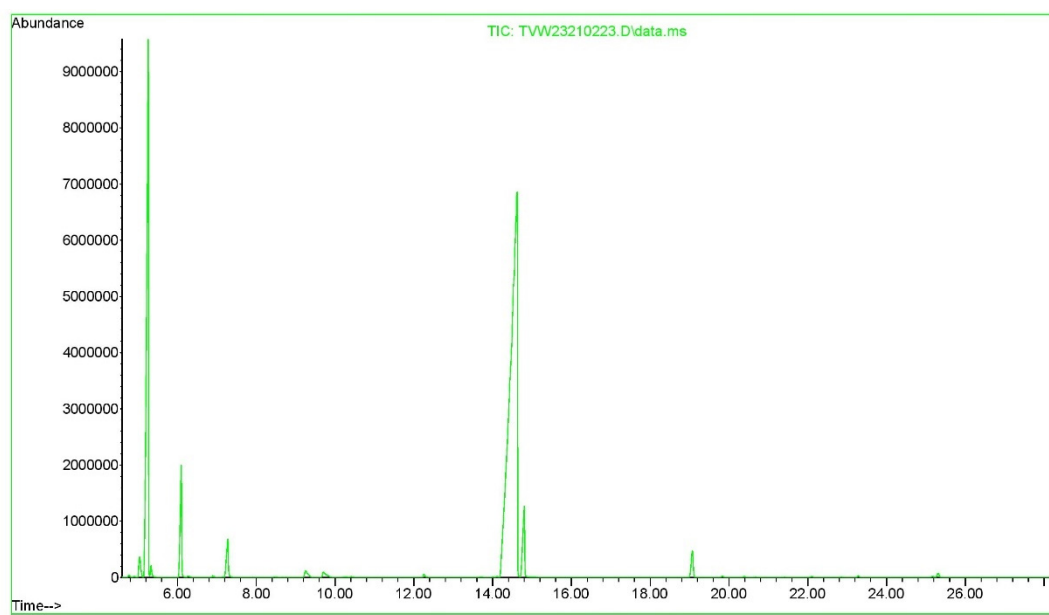

Figure 92 GC-MS chromatogram of *T. vulgaris* after 100 days of storage

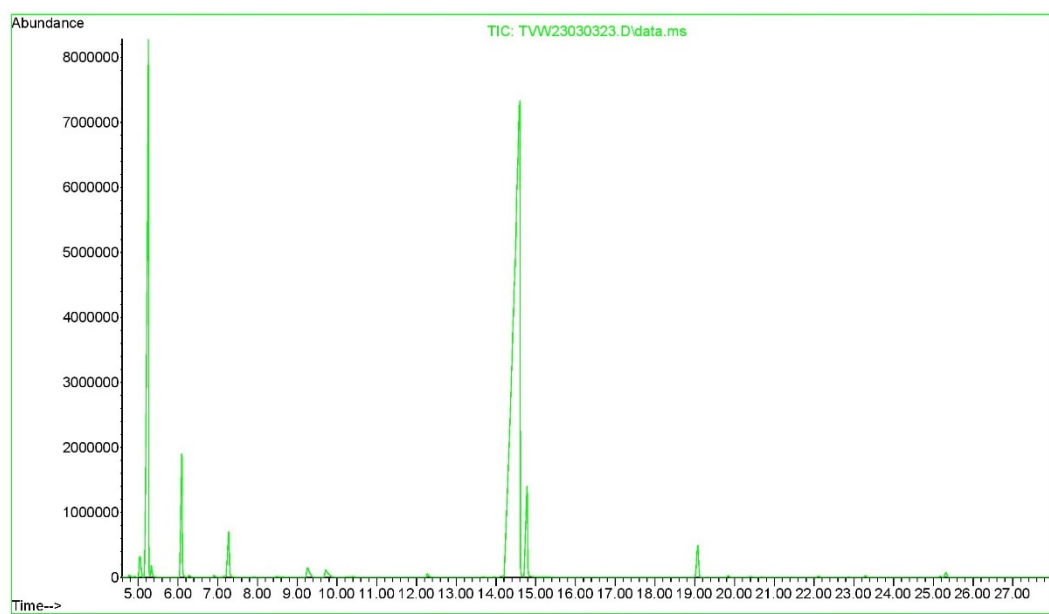

Figure 93 GC-MS chromatogram of *T. vulgaris* after 110 days of storage

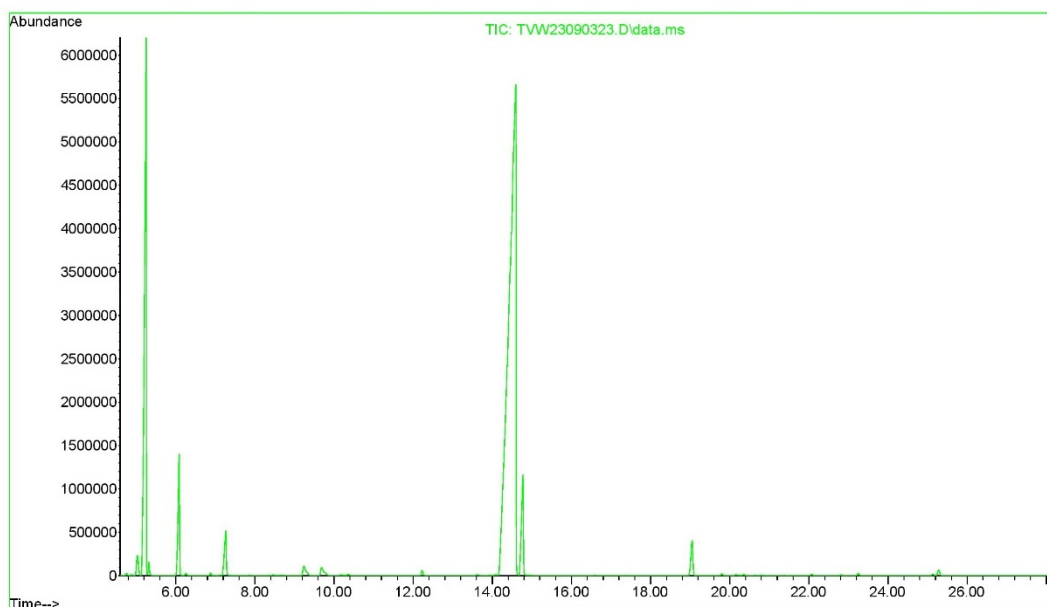

Figure 94 GC-MS chromatogram of *T. vulgaris* after 120 days of storage

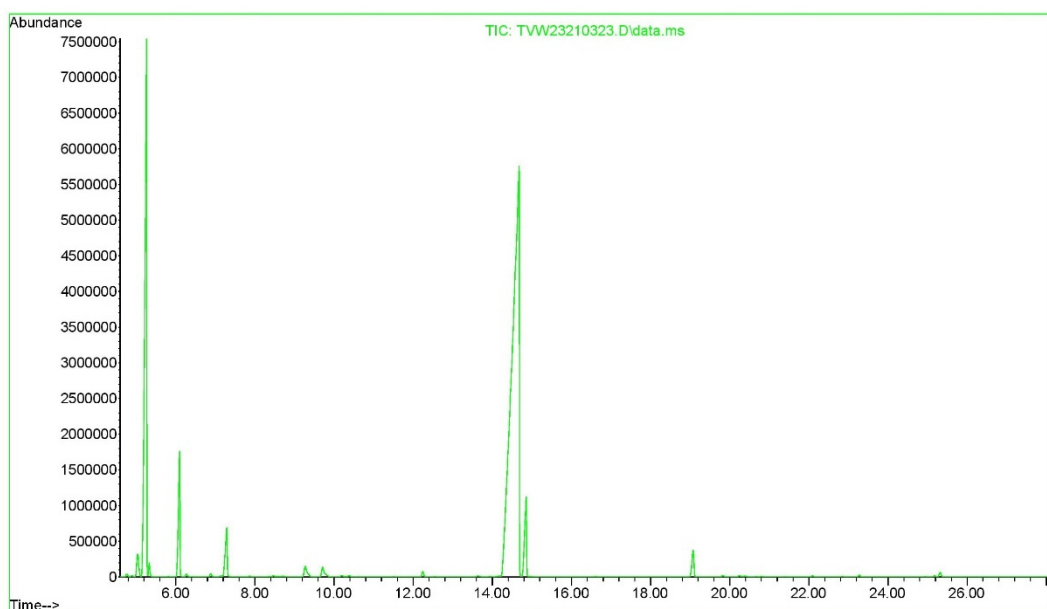

Figure 95 GC-MS chromatogram of *T. vulgaris* after 130 days of storage

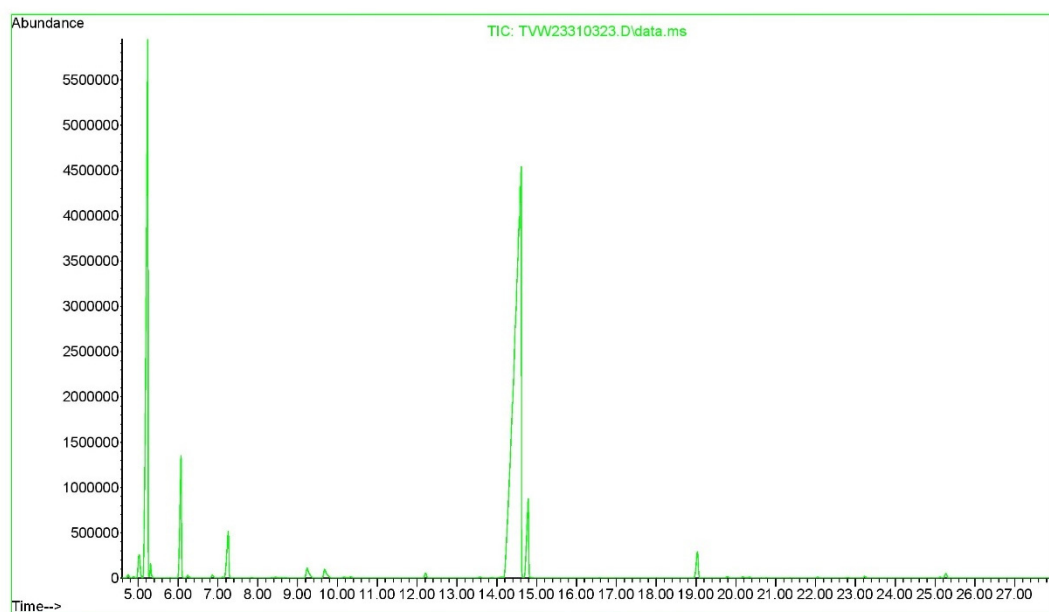

Figure 96 GC-MS chromatogram of *T. vulgaris* after 140 days of storage

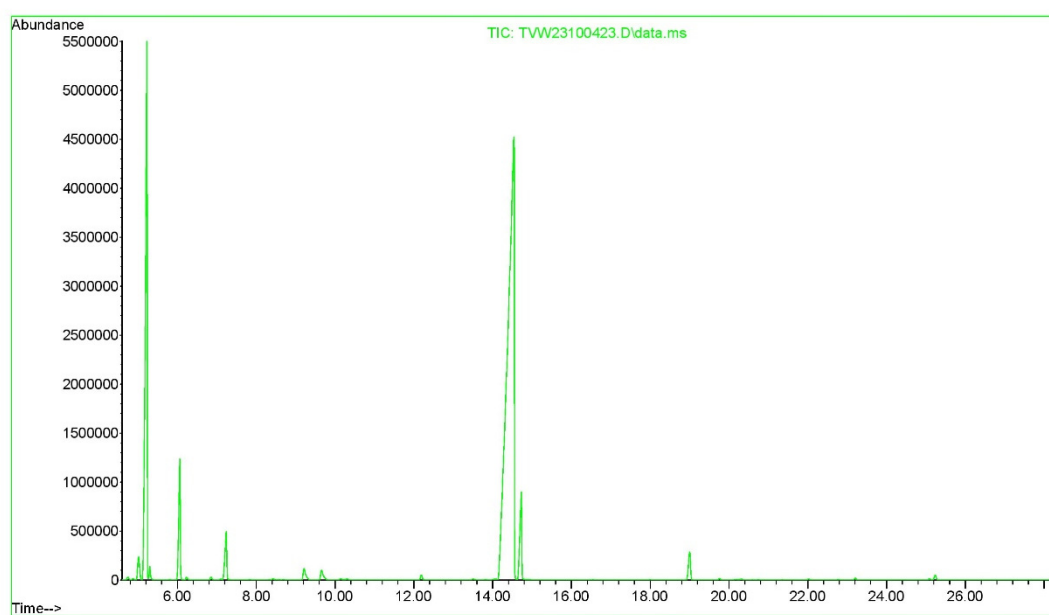

Figure 97 GC-MS chromatogram of *T. vulgaris* after 150 days of storage

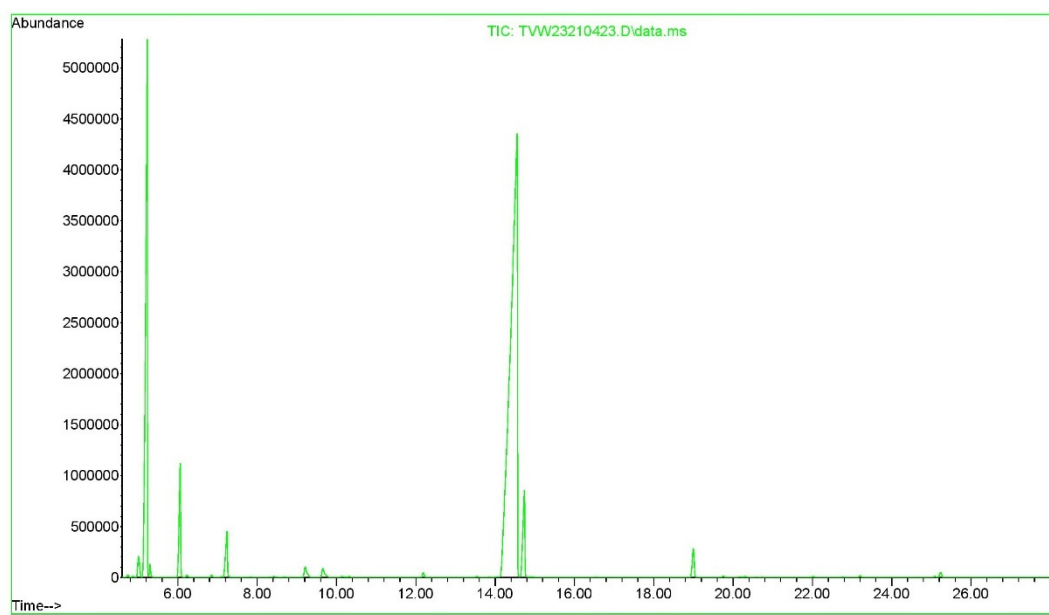

Figure 98 GC-MS chromatogram of *T. vulgaris* after 160 days of storage

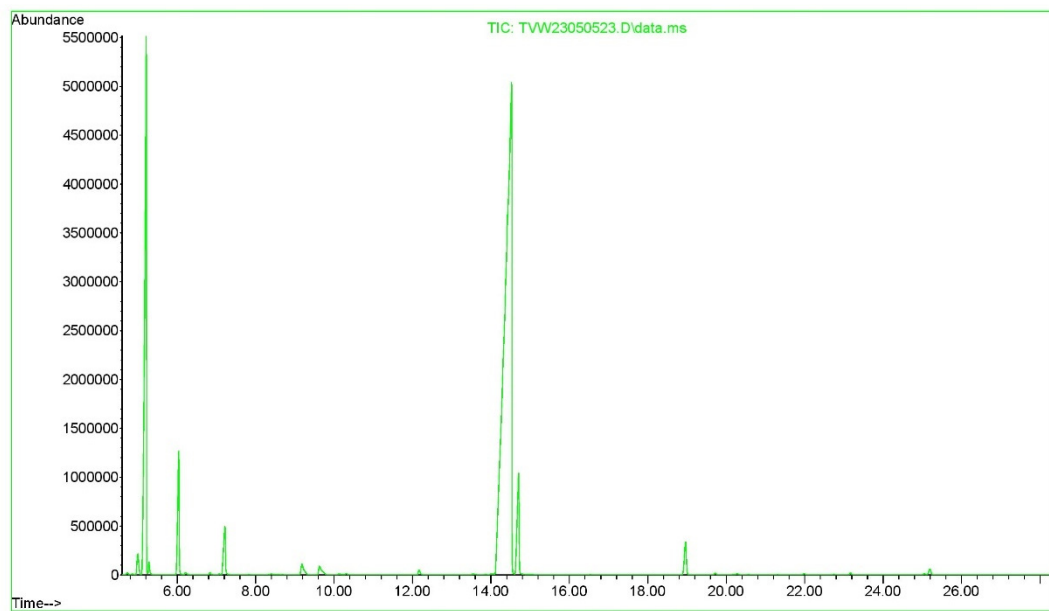

Figure 99 GC-MS chromatogram of *T. vulgaris* after 170 days of storage

#### 4.3. GC-MS chromatograms of the *T. vulgaris* essential oil during storage in glass tubes sealed with cap under direct sunlight exposure for 6 months

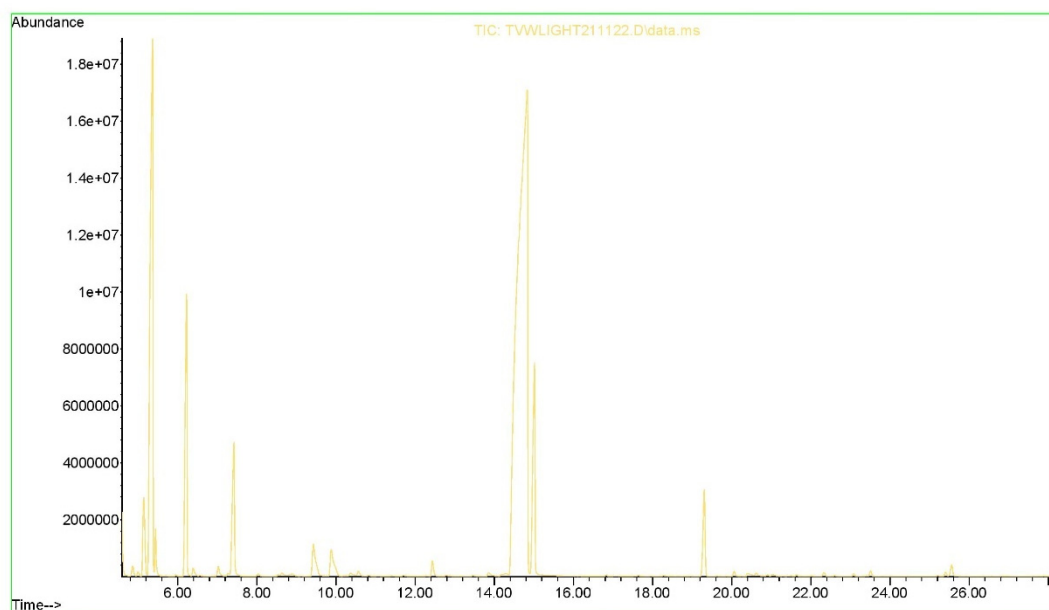

Figure 100 GC-MS chromatogram of *T. vulgaris* after 10 days of storage

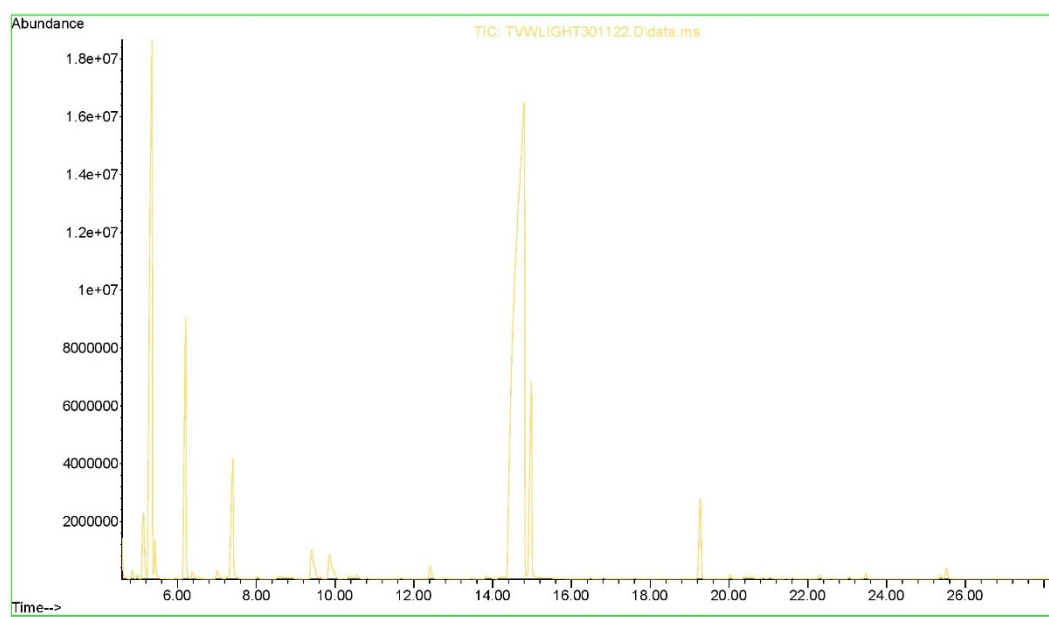

Figure 101 GC-MS chromatogram of *T. vulgaris* after 20 days of storage

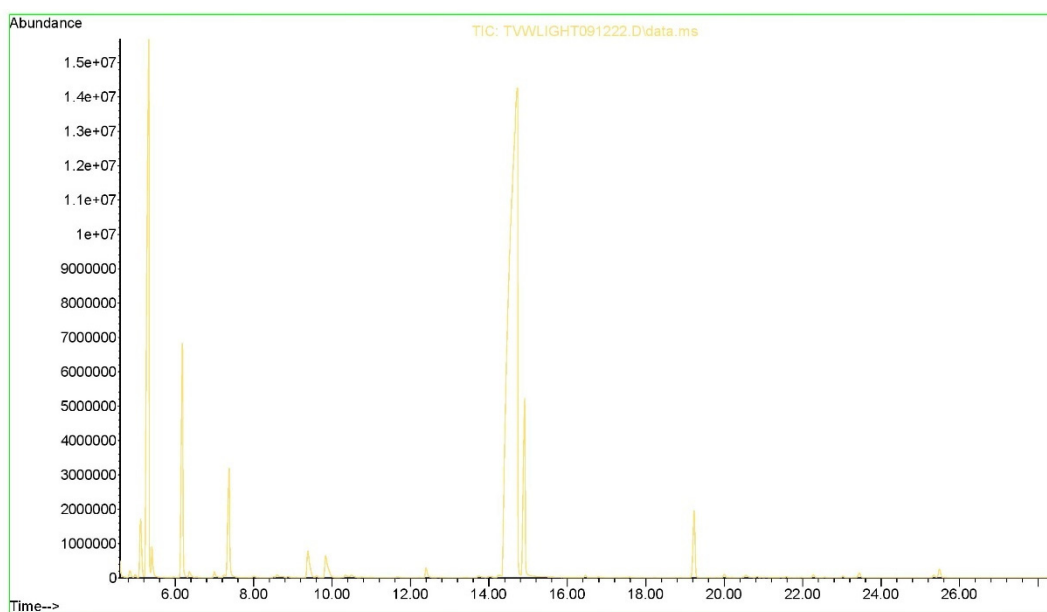

Figure 102 GC-MS chromatogram of *T. vulgaris* after 30 days of storage

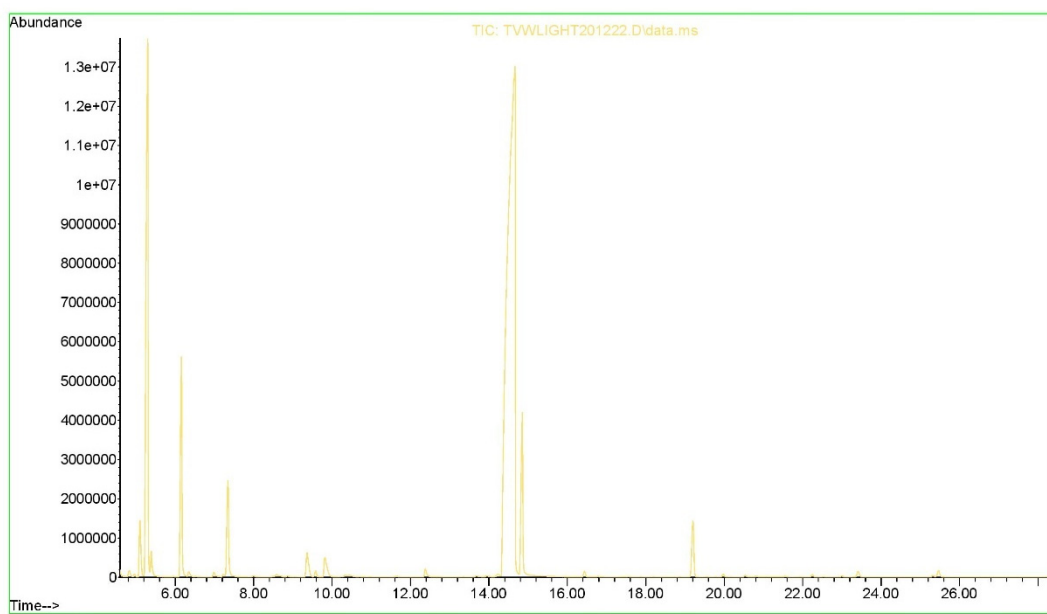

Figure 103 GC-MS chromatogram of *T. vulgaris* after 40 days of storage

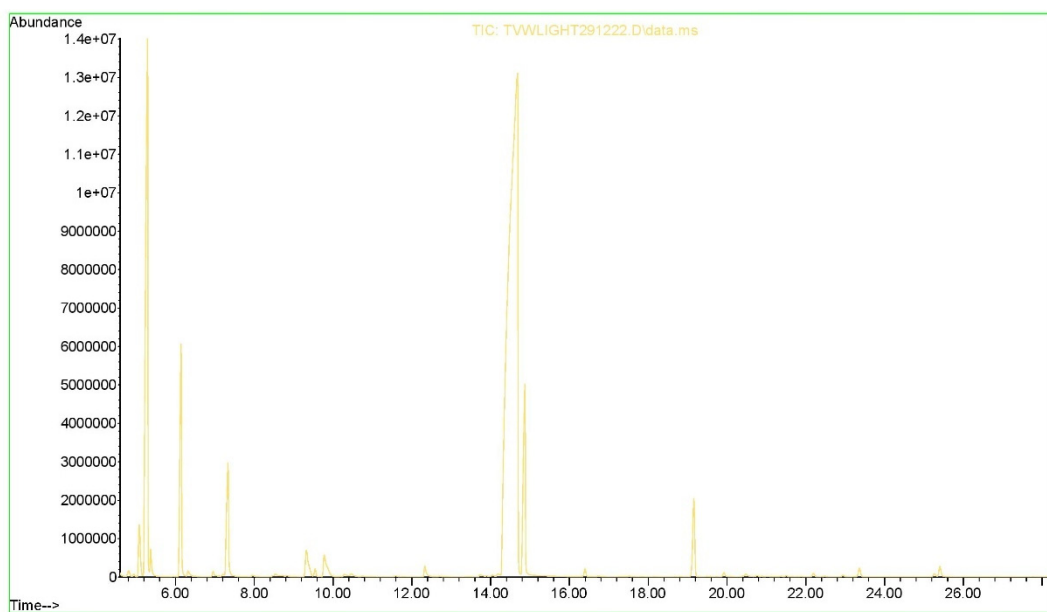

Figure 104 GC-MS chromatogram of *T. vulgaris* after 50 days of storage

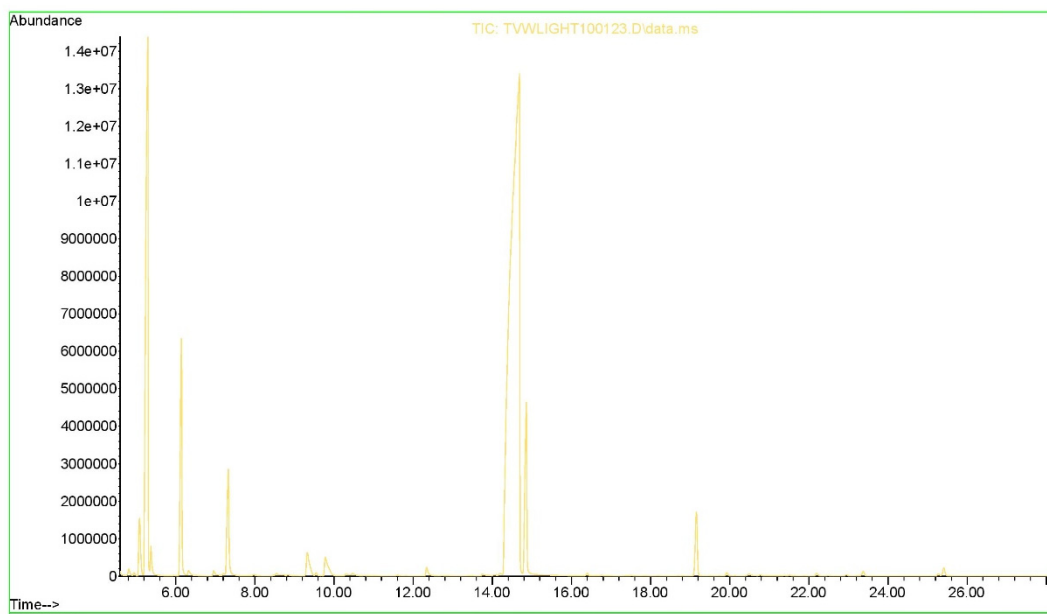

Figure 105 GC-MS chromatogram of *T. vulgaris* after 60 days of storage

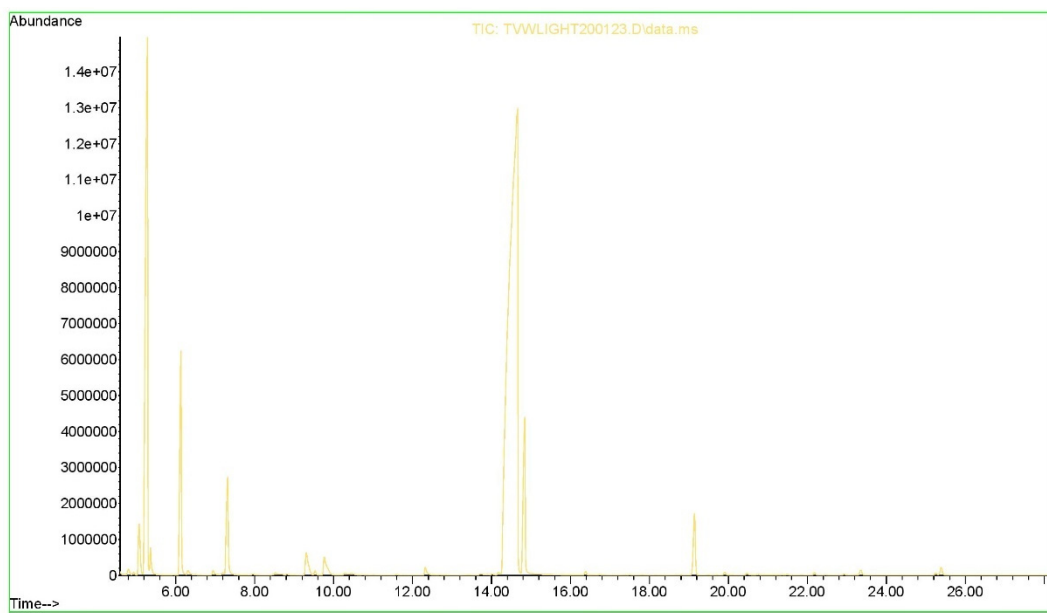

Figure 106 GC-MS chromatogram of *T. vulgaris* after 70 days of storage

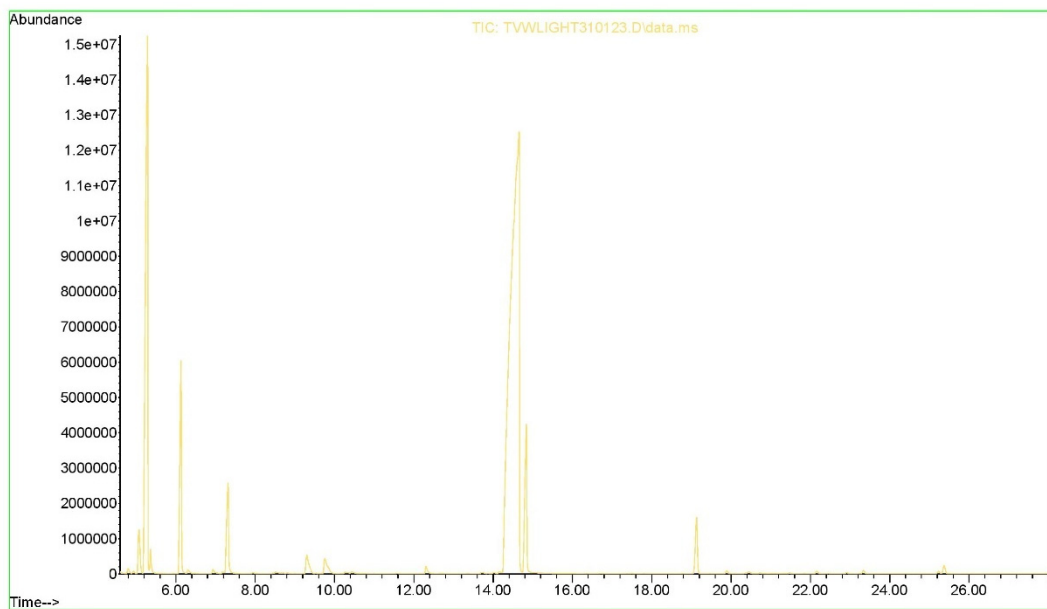

Figure 107 GC-MS chromatogram of *T. vulgaris* after 80 days of storage

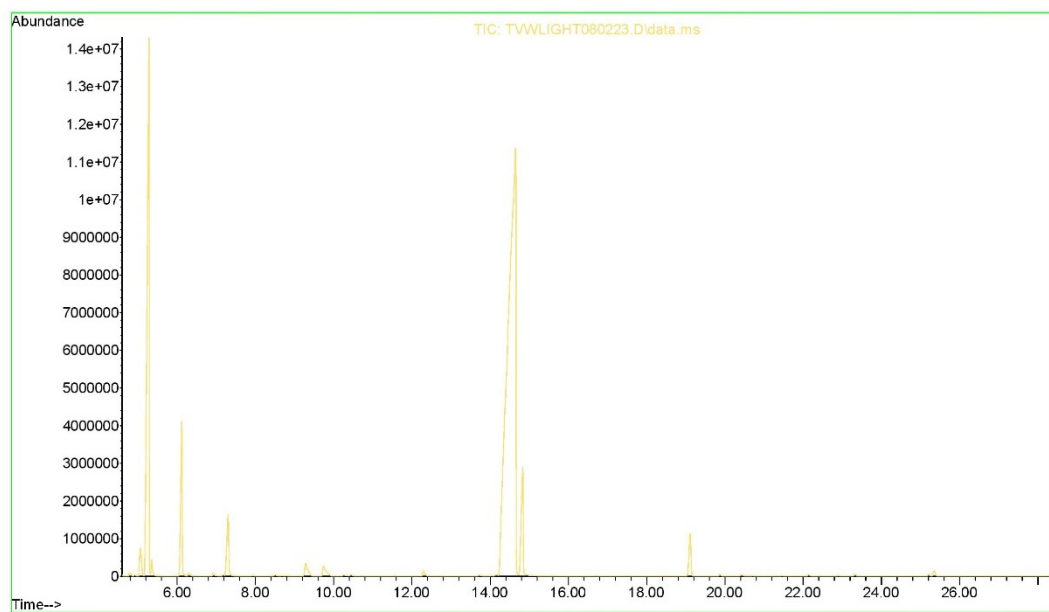

Figure 108 GC-MS chromatogram of *T. vulgaris* after 90 days of storage

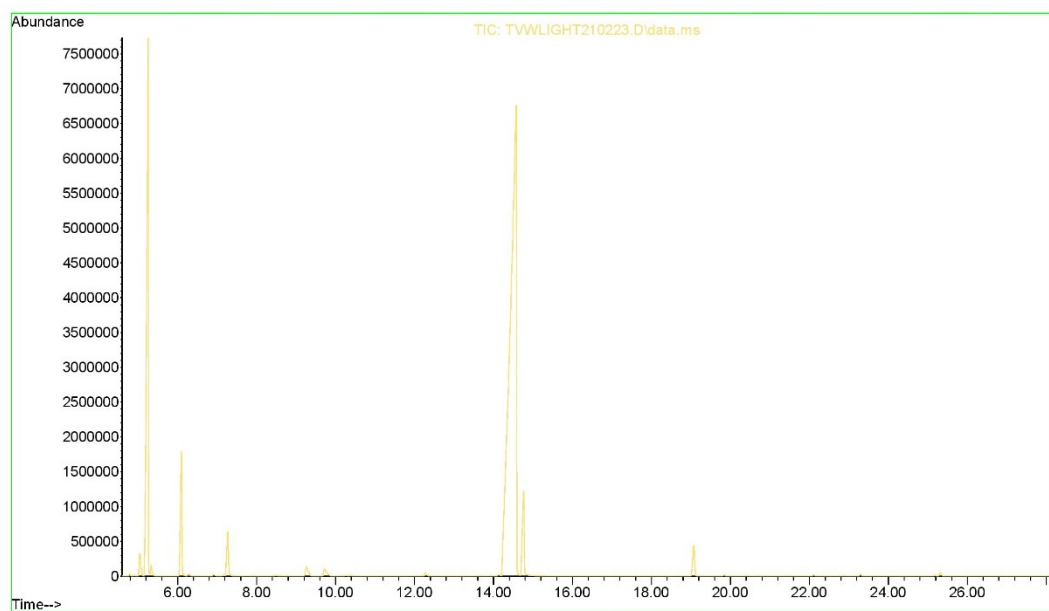

Figure 109 GC-MS chromatogram of *T. vulgaris* after 100 days of storage

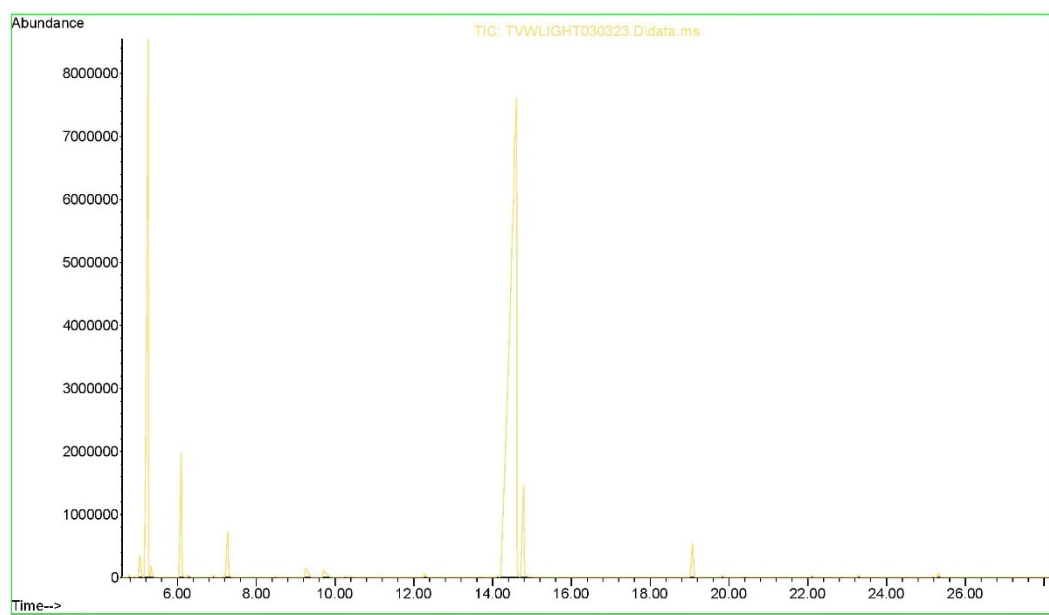

Figure 110 GC-MS chromatogram of *T. vulgaris* after 110 days of storage

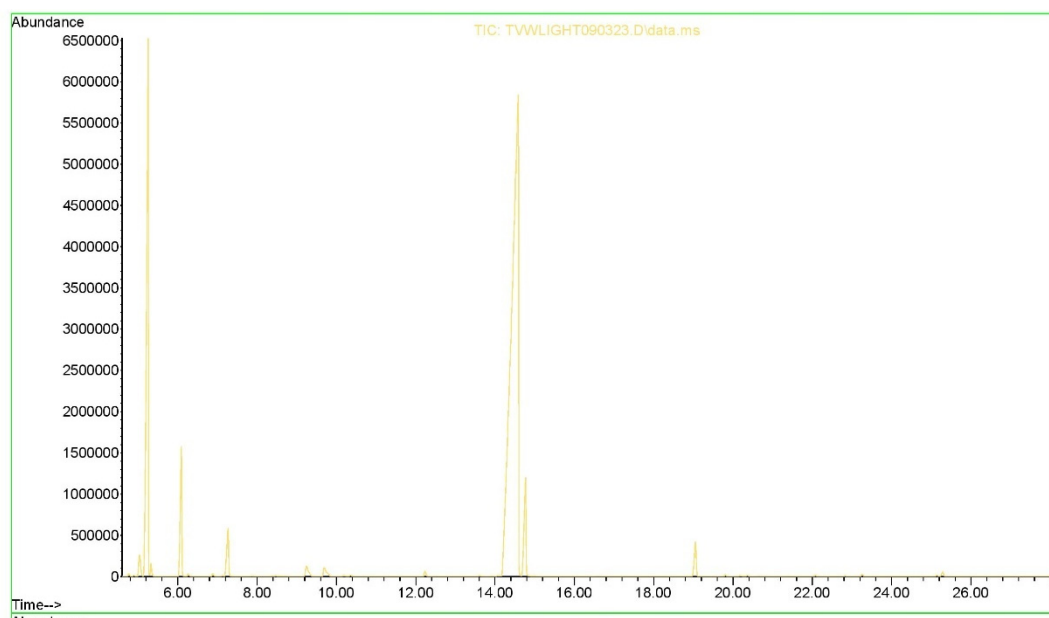

Figure 111 GC-MS chromatogram of *T. vulgaris* after 120 days of storage

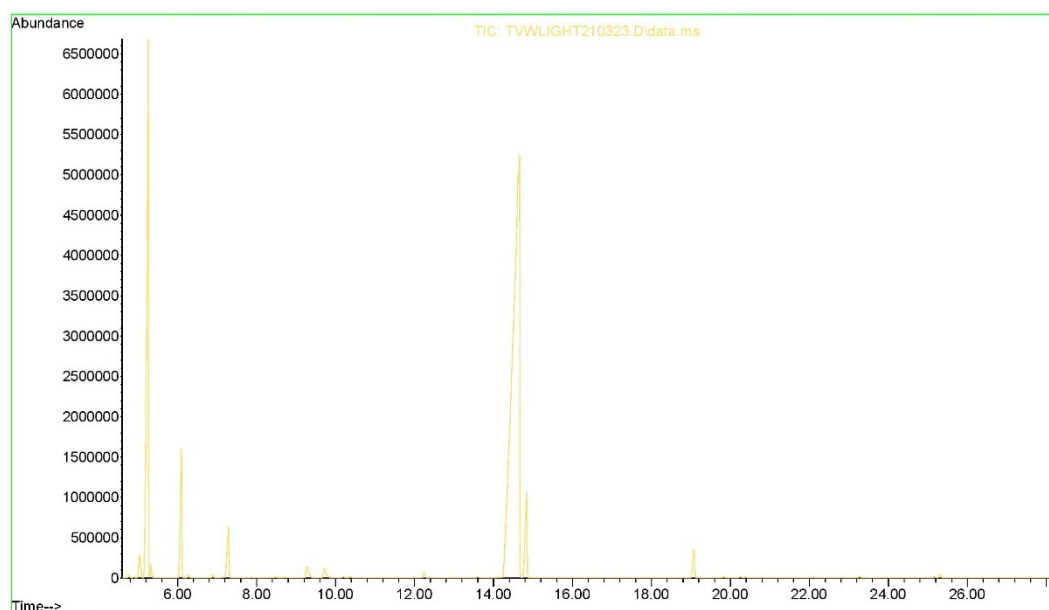

Figure 112 GC-MS chromatogram of *T. vulgaris* after 130 days of storage

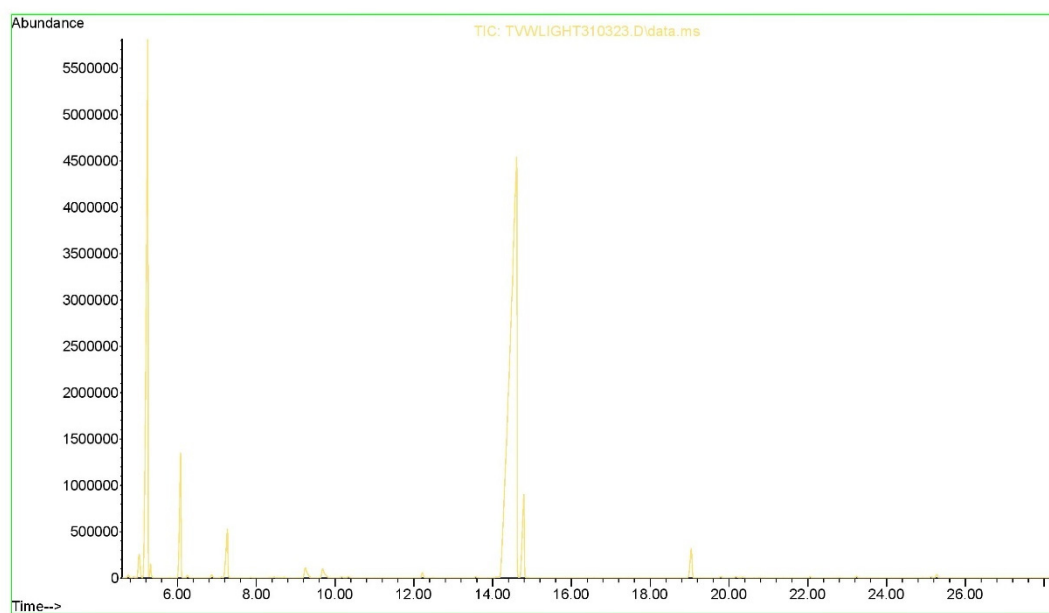

Figure 113 GC-MS chromatogram of *T. vulgaris* after 140 days of storage

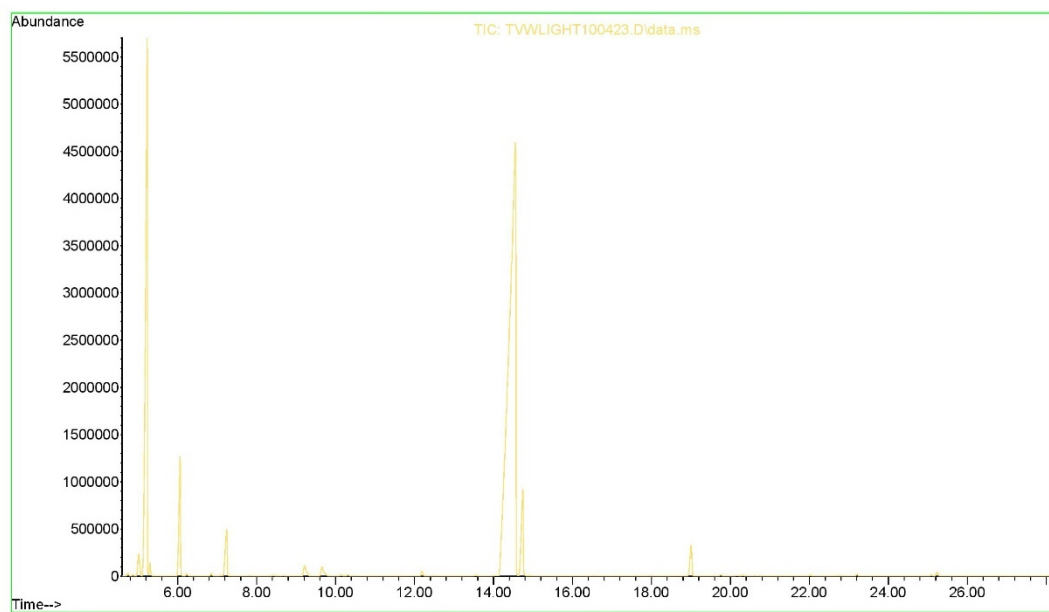

Figure 114 GC-MS chromatogram of *T. vulgaris* after 150 days of storage

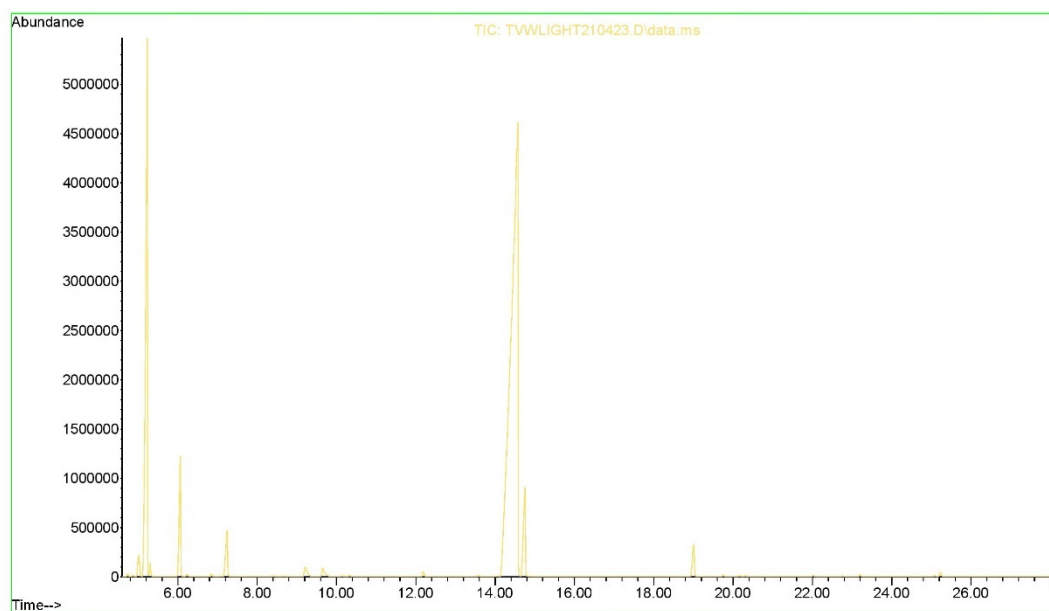

Figure 115 GC-MS chromatogram of *T. vulgaris* after 160 days of storage

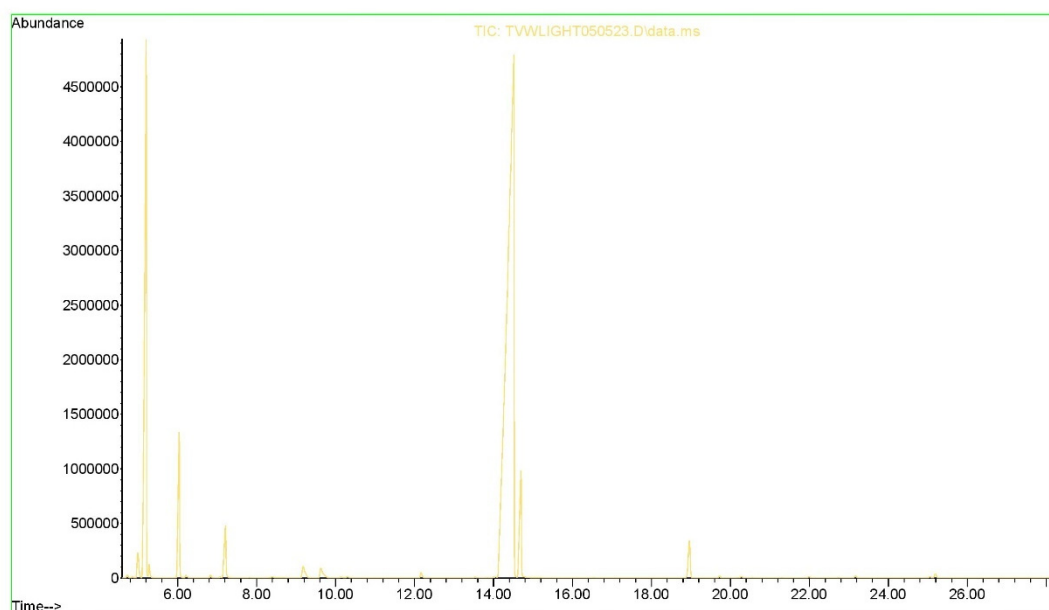

Figure 116 GC-MS chromatogram of *T. vulgaris* after 170 days of storage

#### 4.4. GC-MS chromatograms of the *T. vulgaris* essential oil during storage in sealed glass ampoules at 35 °C for 3 months

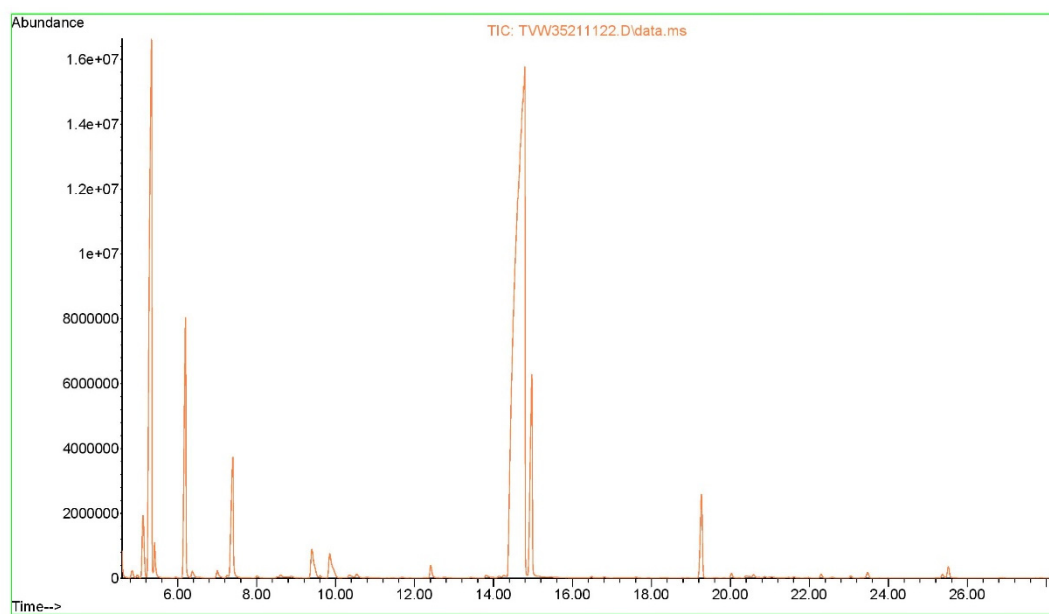

Figure 117 GC-MS chromatogram of *T. vulgaris* after 10 days of storage

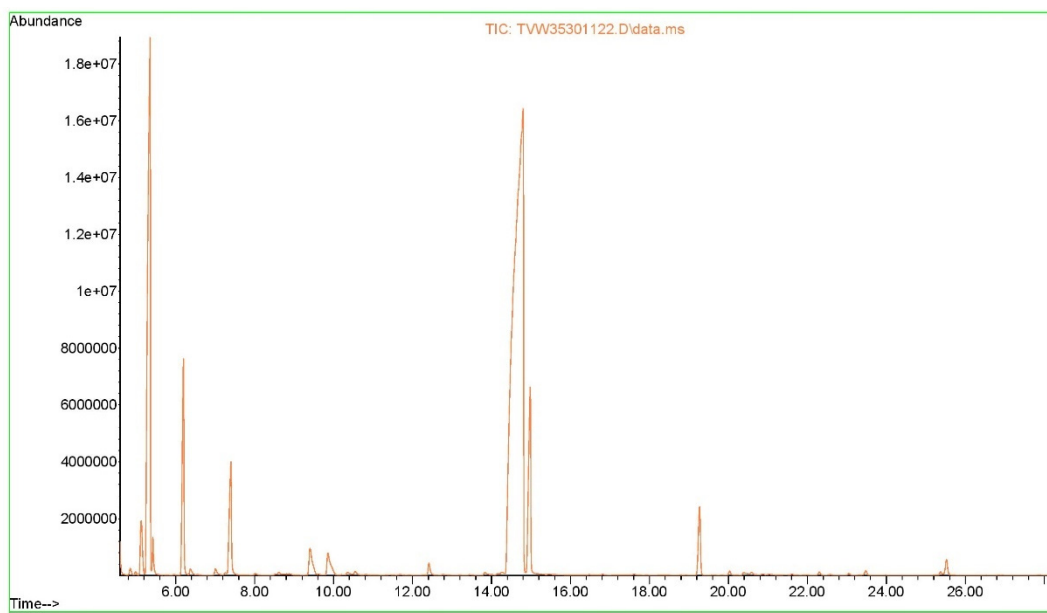

Figure 118 GC-MS chromatogram of *T. vulgaris* after 20 days of storage

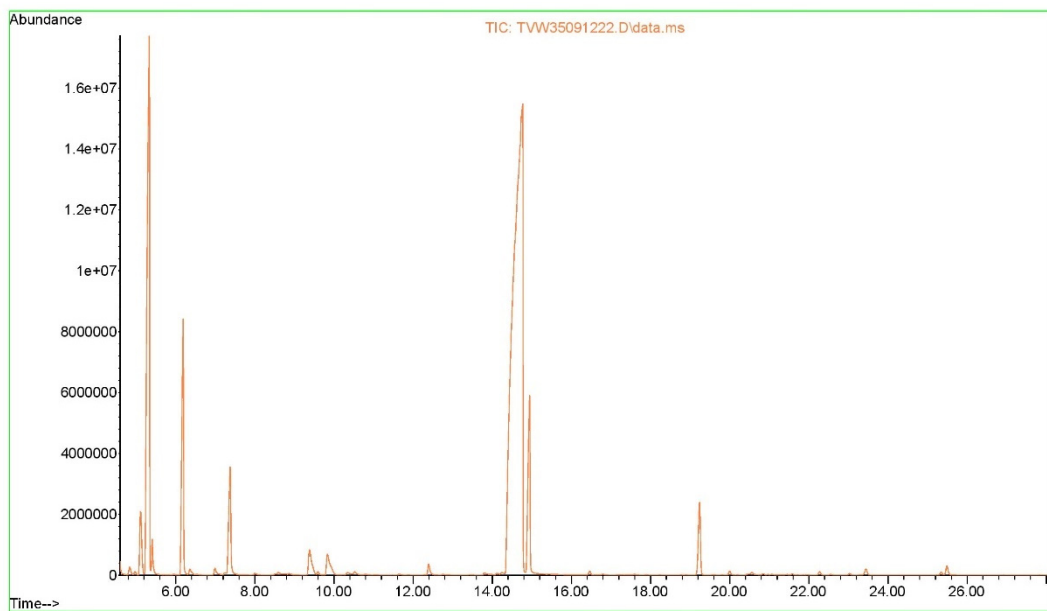

Figure 119 GC-MS chromatogram of *T. vulgaris* after 30 days of storage

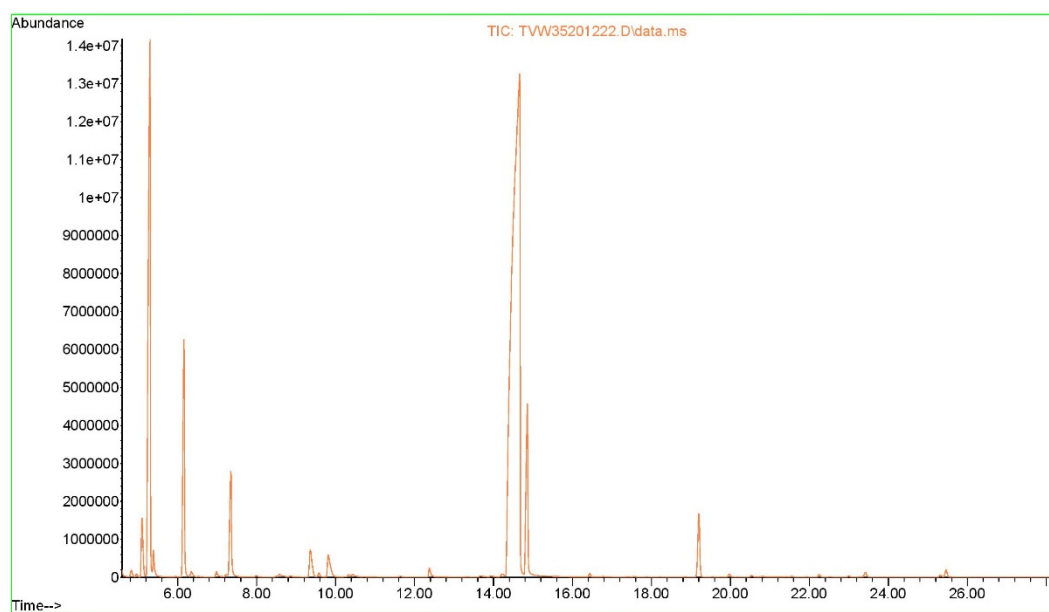

Figure 120 GC-MS chromatogram of *T. vulgaris* after 40 days of storage

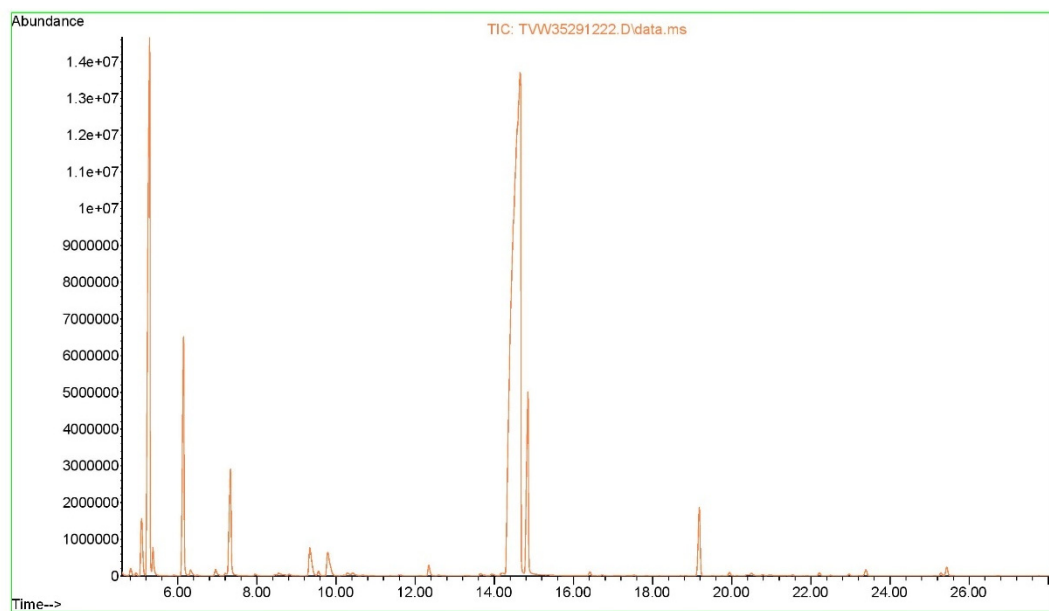

Figure 121 GC-MS chromatogram of *T. vulgaris* after 50 days of storage

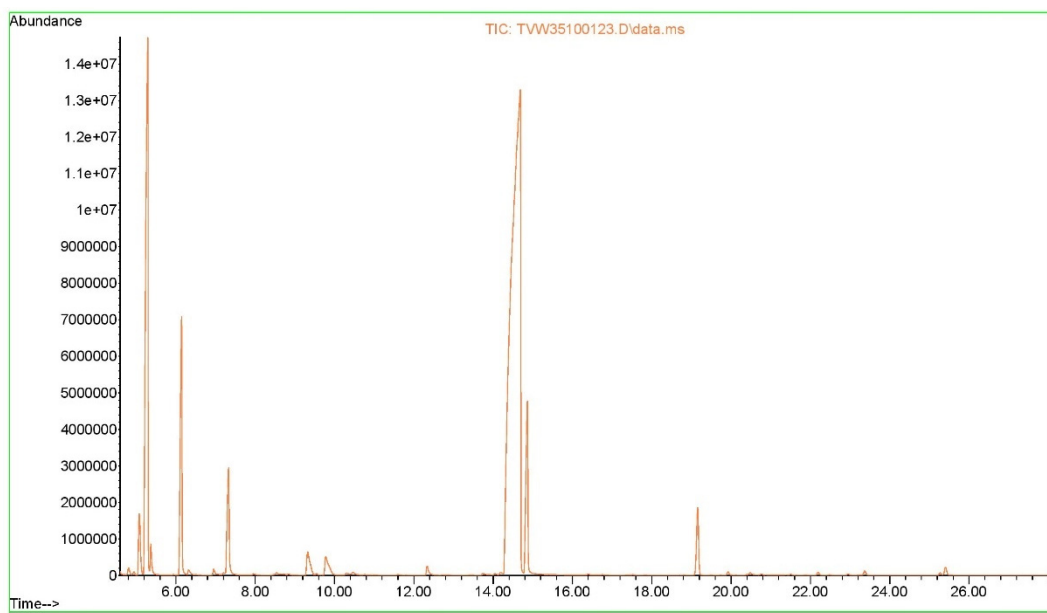

Figure 122 GC-MS chromatogram of *T. vulgaris* after 60 days of storage

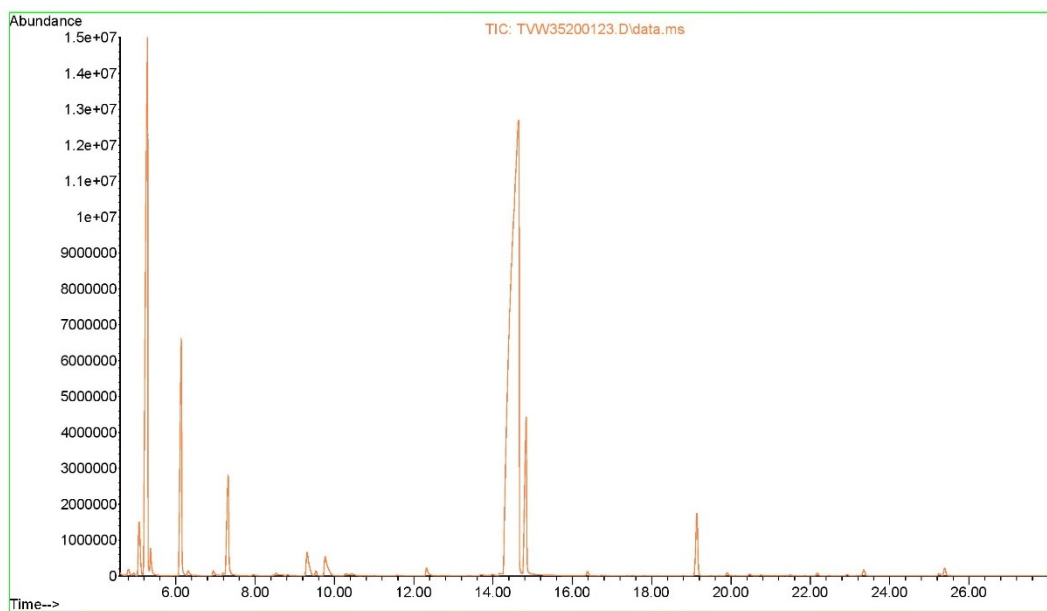

Figure 123 GC-MS chromatogram of *T. vulgaris* after 70 days of storage

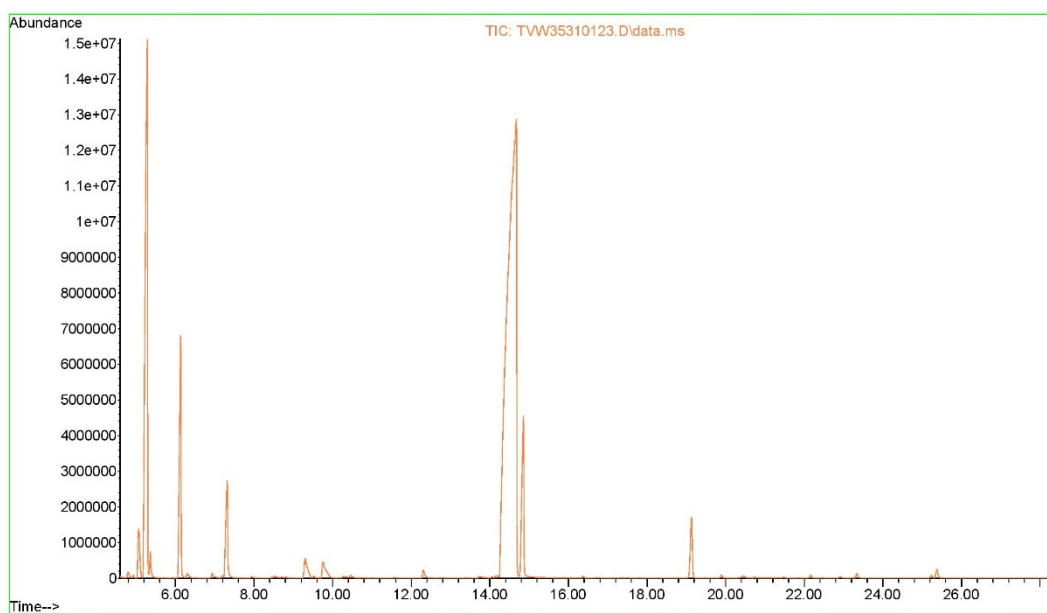

Figure 124 GC-MS chromatogram of *T. vulgaris* after 80 days of storage

#### 4.5. GC-MS chromatograms of the *T. vulgaris* essential oil during storage in sealed glass ampoules at 45 °C for 3 months

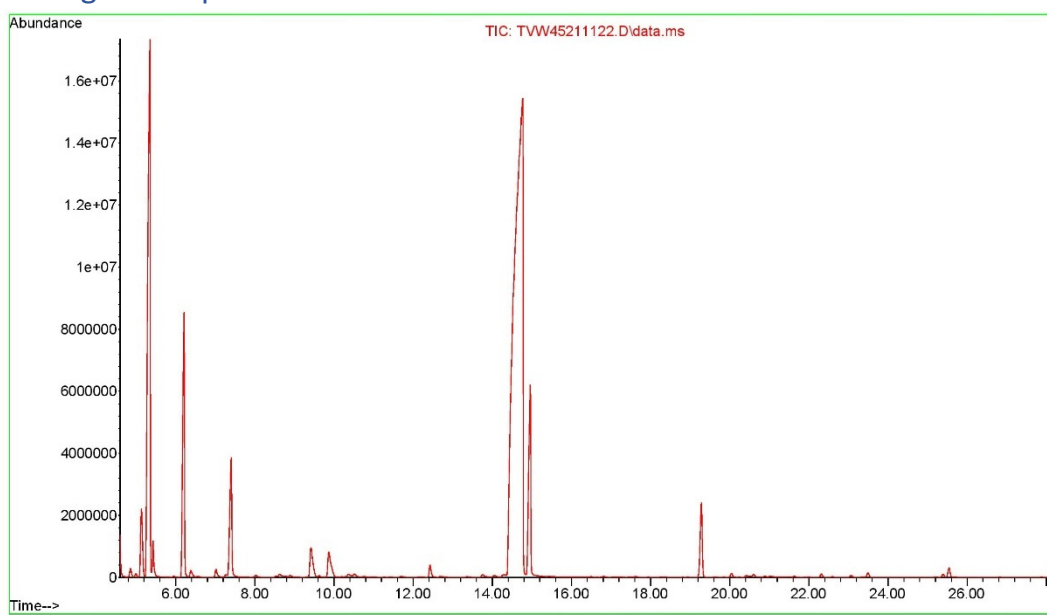

Figure 125 GC-MS chromatogram of *T. vulgaris* after 10 days of storage

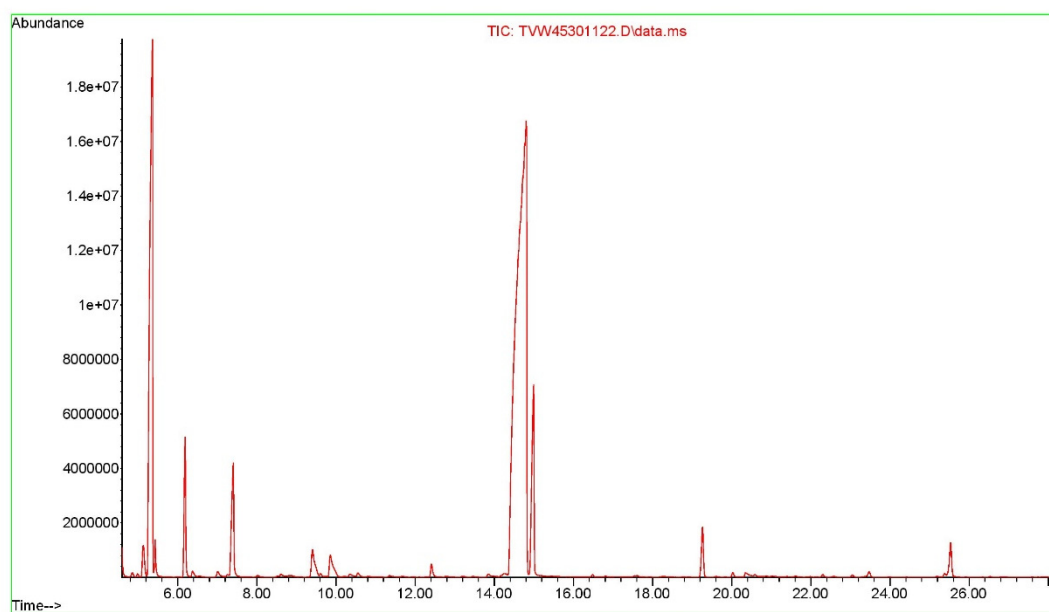

Figure 126 GC-MS chromatogram of *T. vulgaris* after 20 days of storage

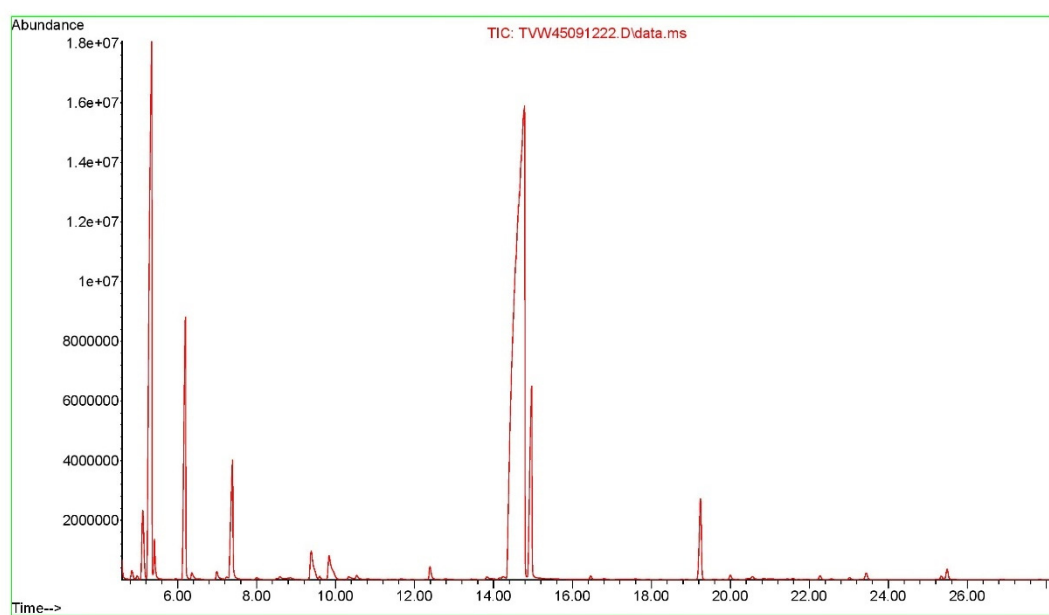

Figure 127 GC-MS chromatogram of *T. vulgaris* after 30 days of storage

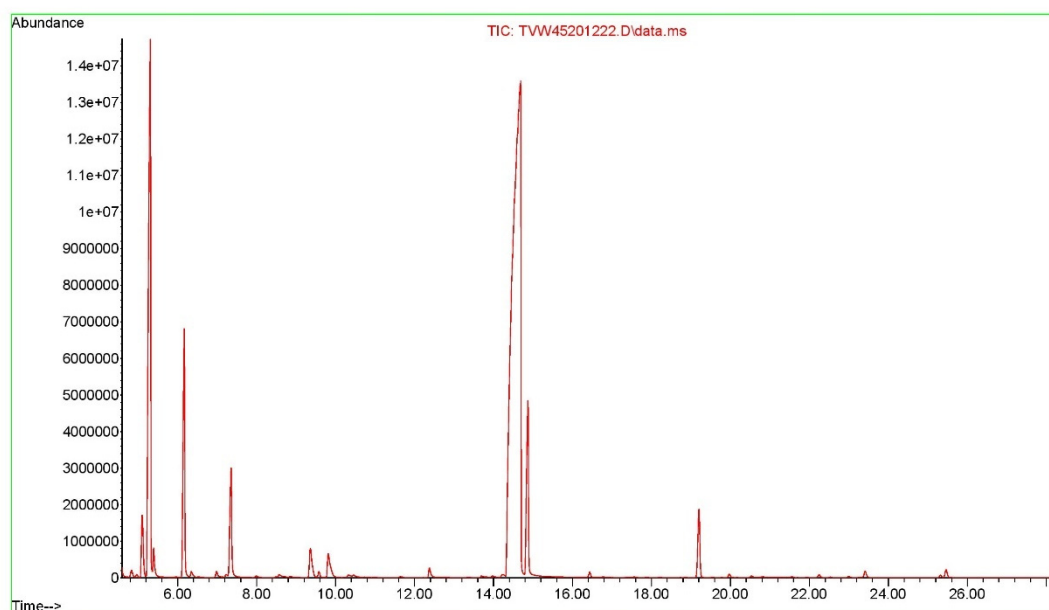

Figure 128 GC-MS chromatogram of *T. vulgaris* after 40 days of storage

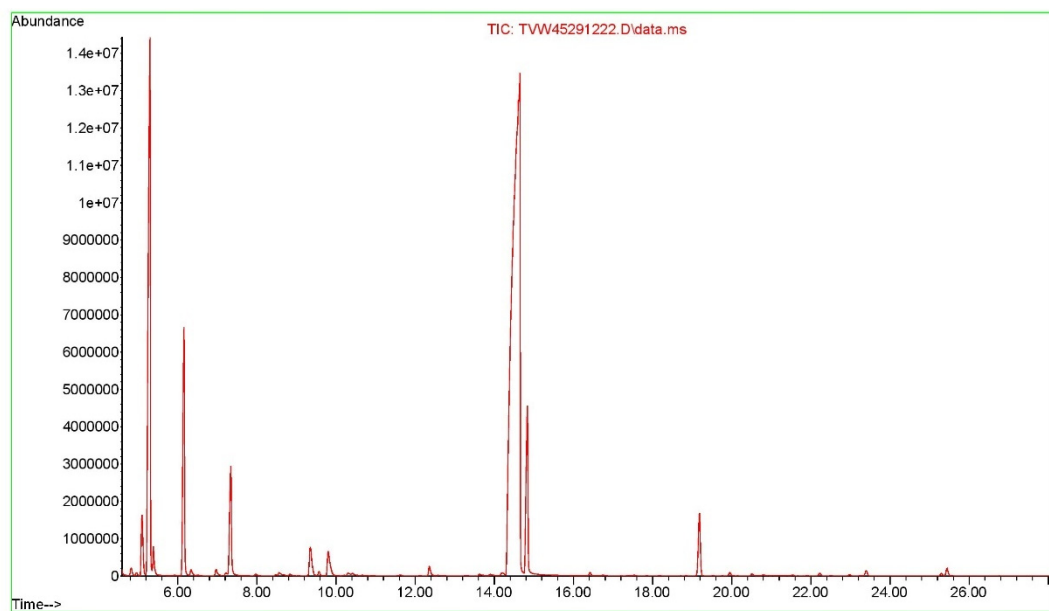

Figure 129 GC-MS chromatogram of *T. vulgaris* after 50 days of storage

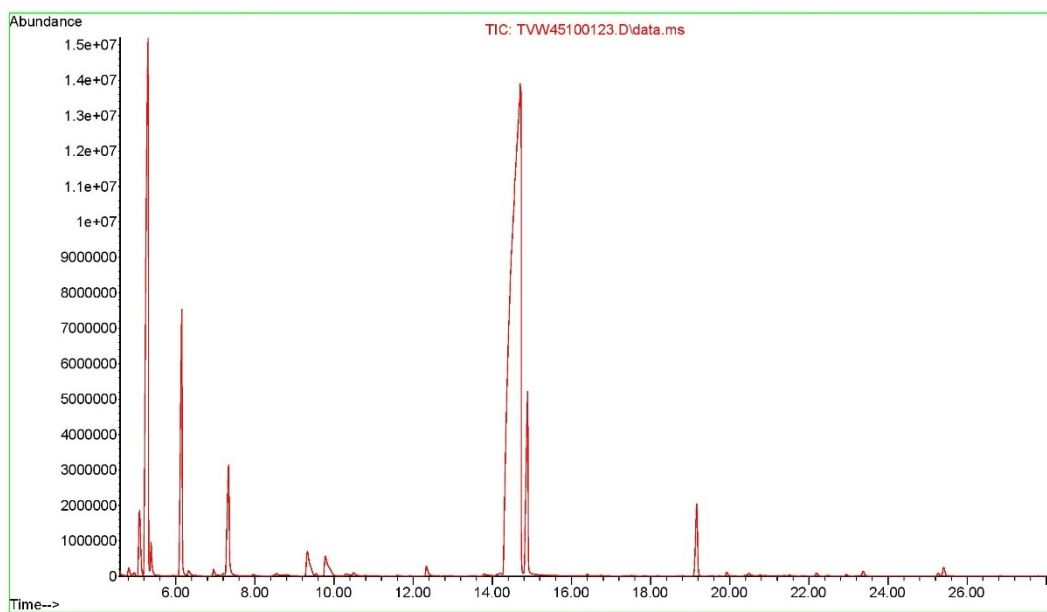

Figure 130 GC-MS chromatogram of *T. vulgaris* after 60 days of storage

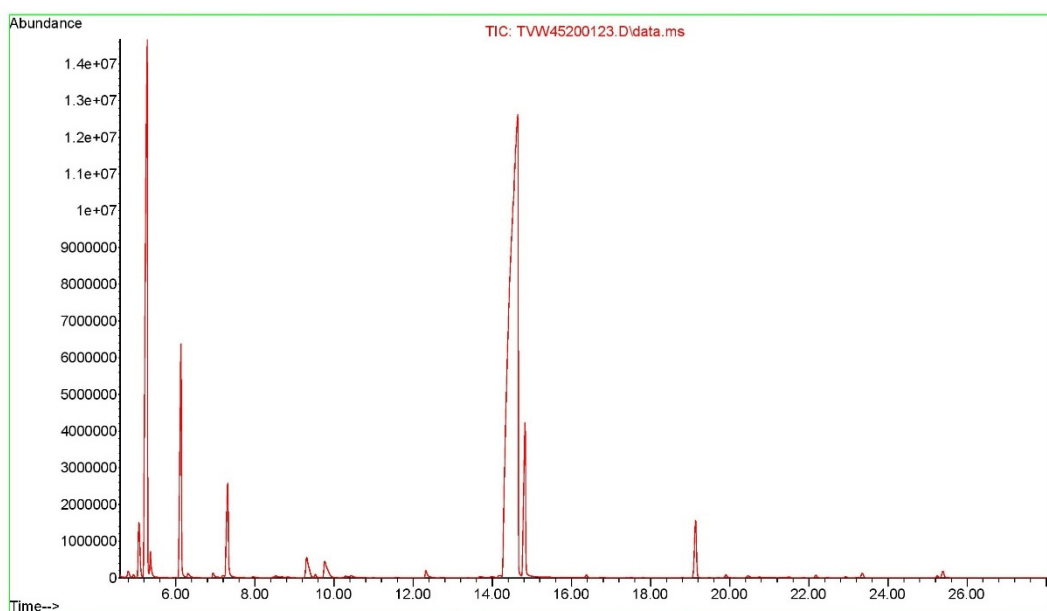

Figure 131 GC-MS chromatogram of *T. vulgaris* after 70 days of storage

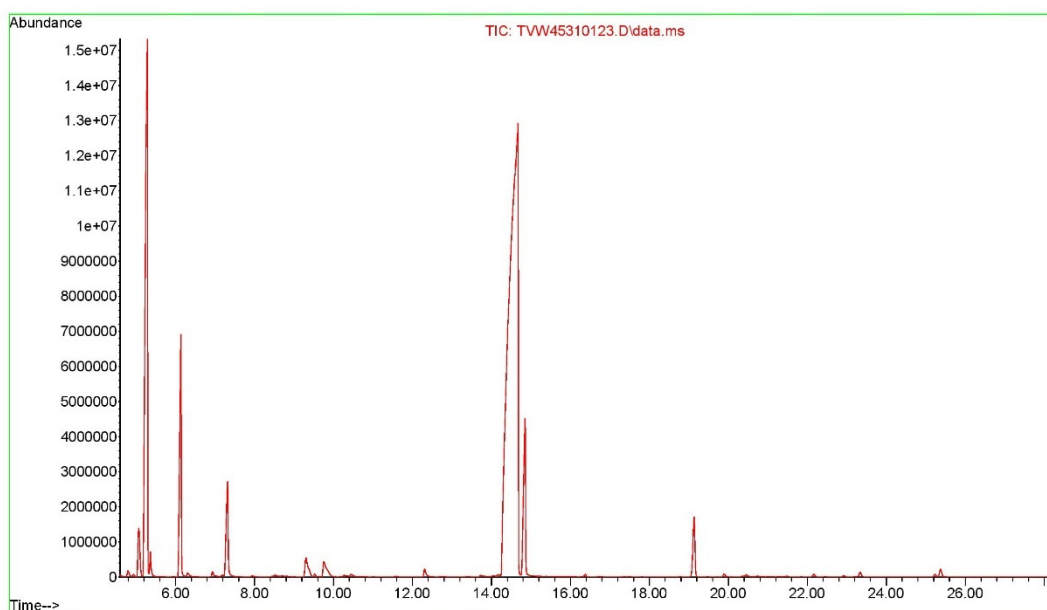

Figure 132 GC-MS chromatogram of *T. vulgaris* after 80 days of storage

#### 4.6. GC-MS chromatograms of the *T. vulgaris* essential oil during storage in glass tubes sealed with cap at 35 °C for 3 months

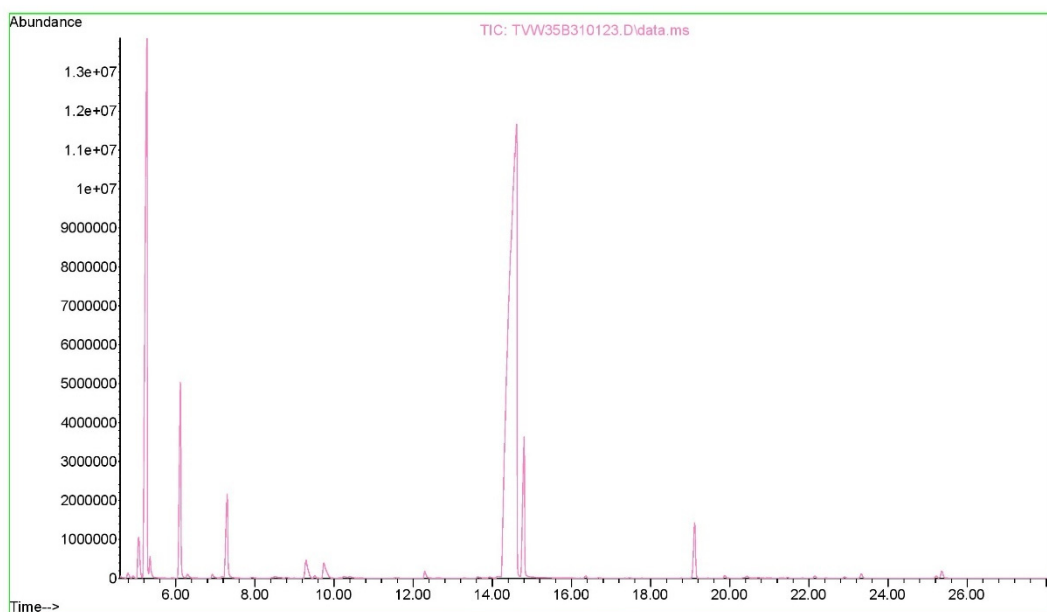

Figure 133 GC-MS chromatogram of *T. vulgaris* after 10 days of storage

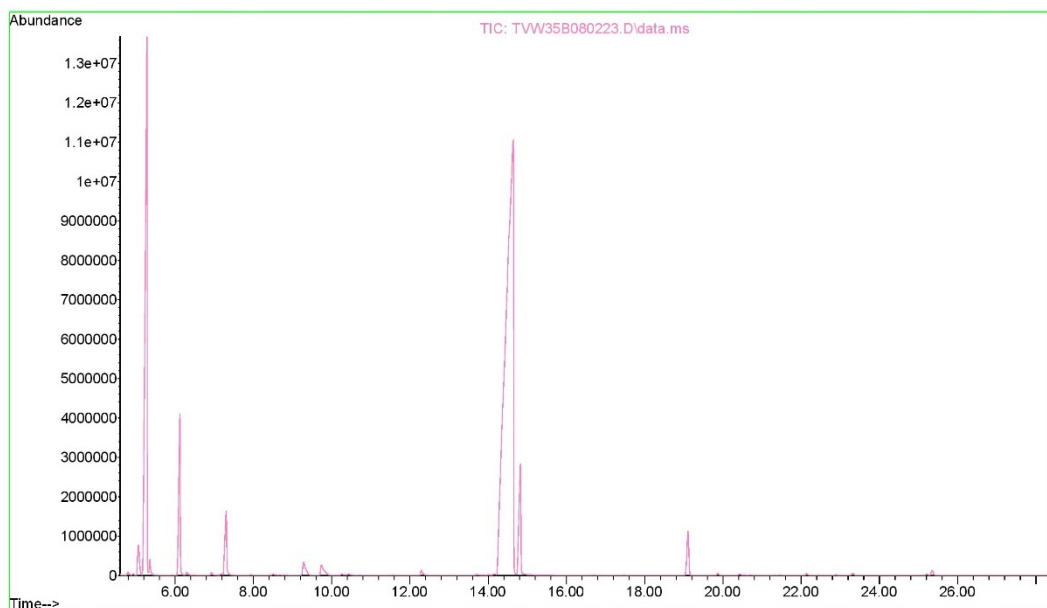

Figure 134 GC-MS chromatogram of *T. vulgaris* after 20 days of storage

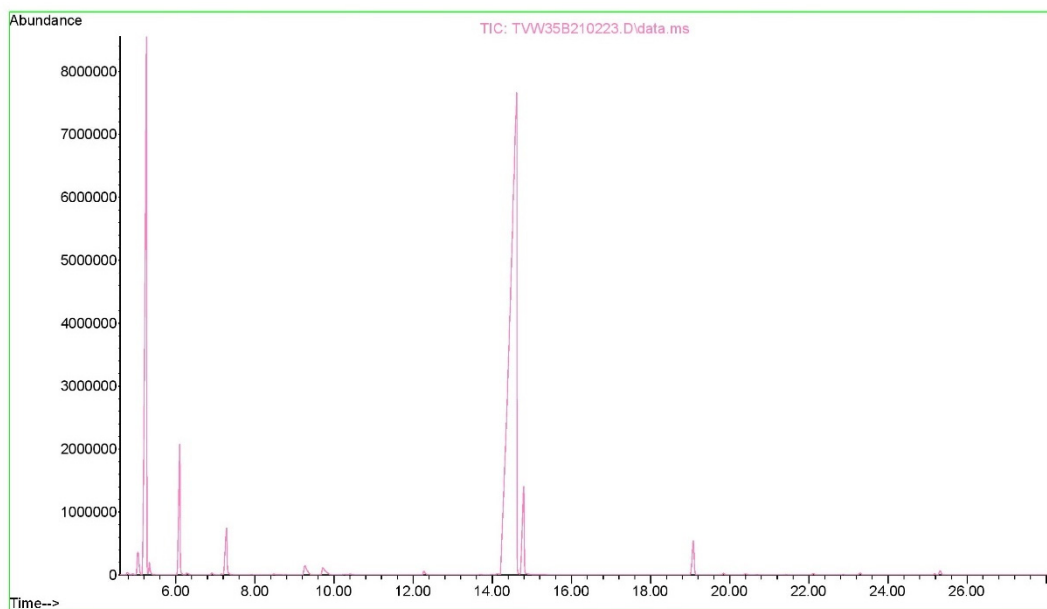

Figure 135 GC-MS chromatogram of *T. vulgaris* after 30 days of storage

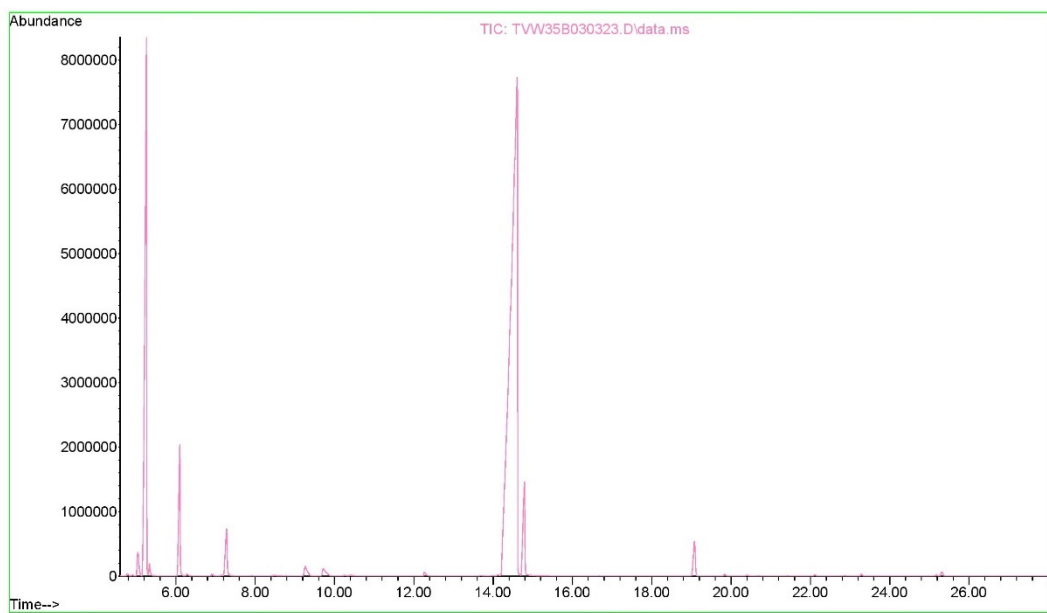

Figure 136 GC-MS chromatogram of *T. vulgaris* after 40 days of storage

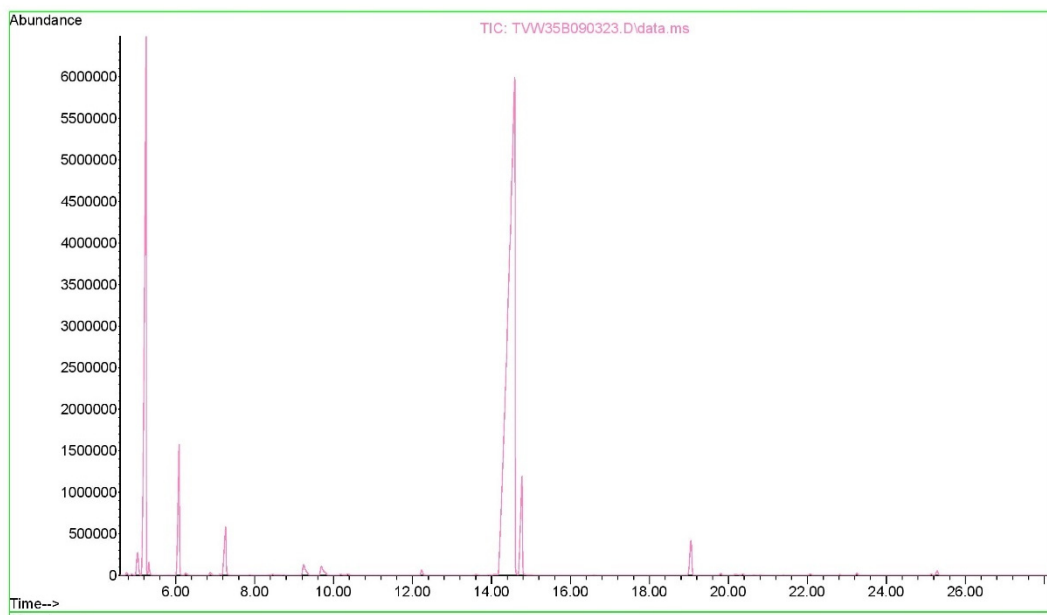

Figure 137 GC-MS chromatogram of *T. vulgaris* after 50 days of storage

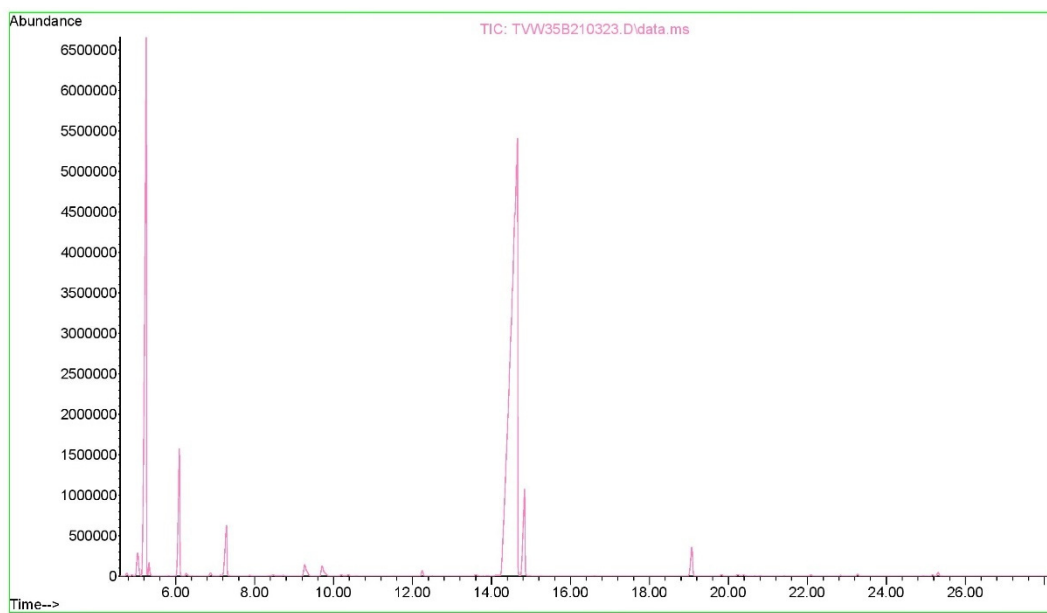

Figure 138 GC-MS chromatogram of *T. vulgaris* after 60 days of storage

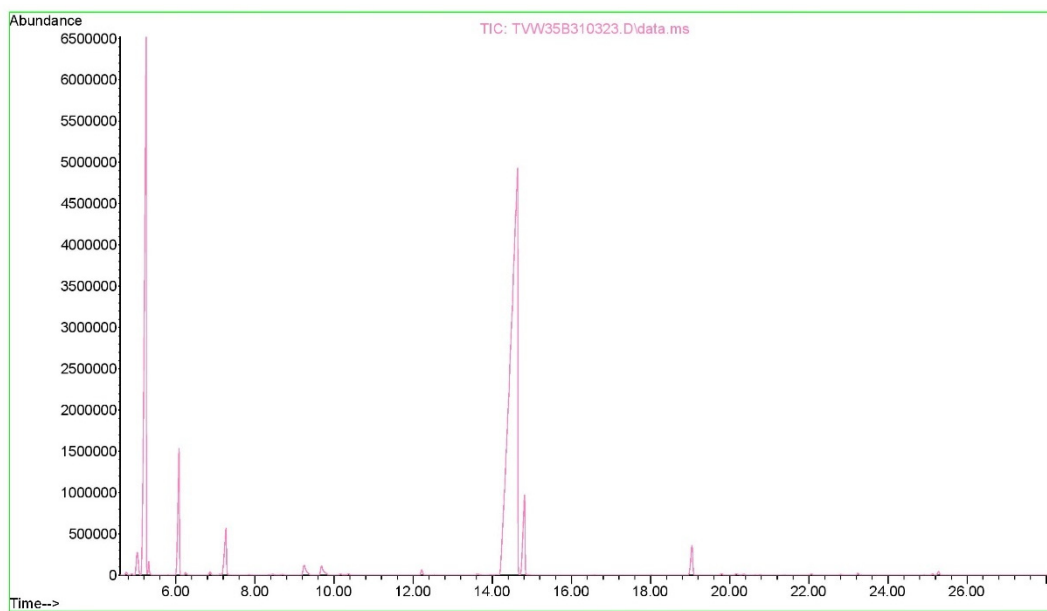

Figure 139 GC-MS chromatogram of *T. vulgaris* after 70 days of storage

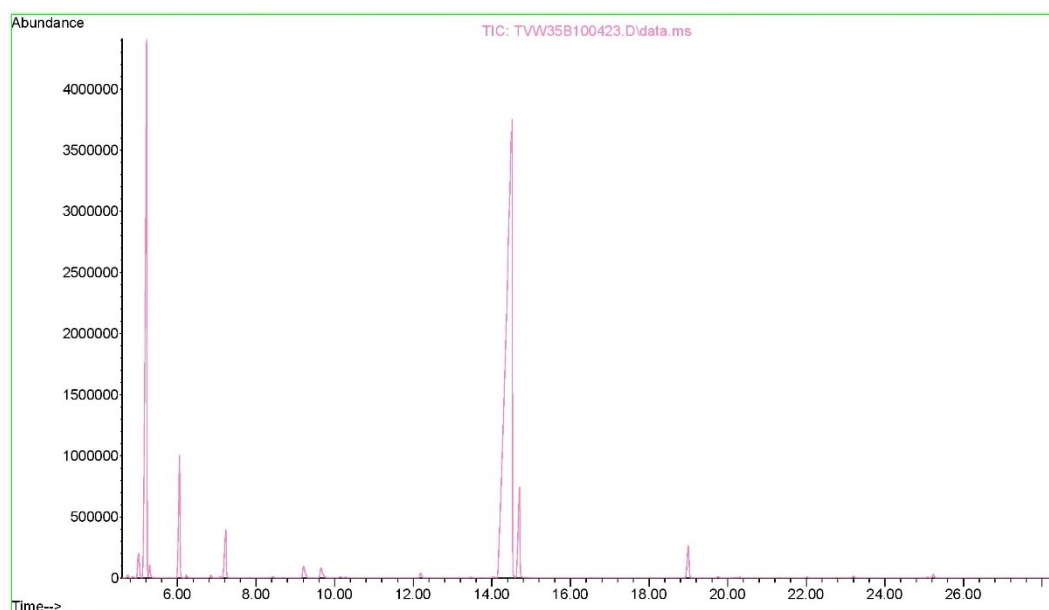

Figure 140 GC-MS chromatogram of *T. vulgaris* after 80 days of storage

#### 4.7. GC-MS chromatograms of the *T. vulgaris* essential oil during storage in glass tubes sealed with cap at 45 °C for 3 months

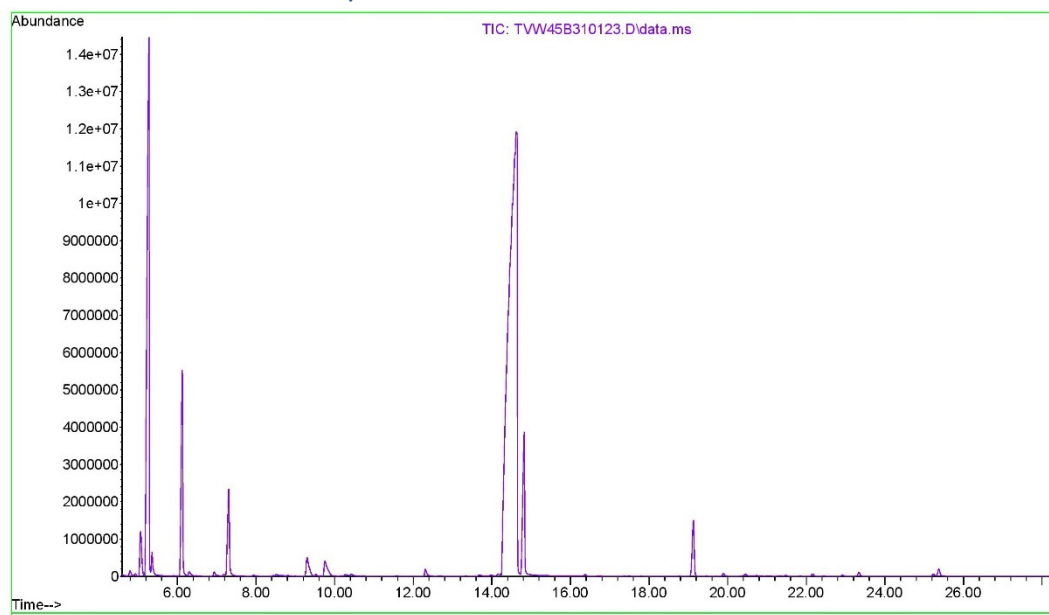

Figure 141 GC-MS chromatogram of *T. vulgaris* after 10 days of storage

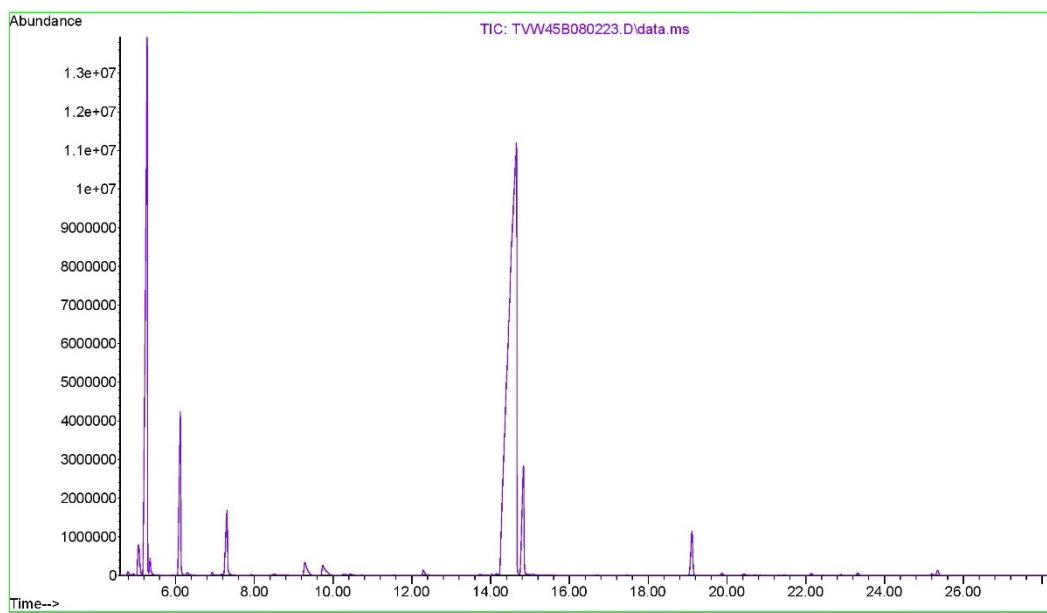

Figure 142 GC-MS chromatogram of *T. vulgaris* after 20 days of storage

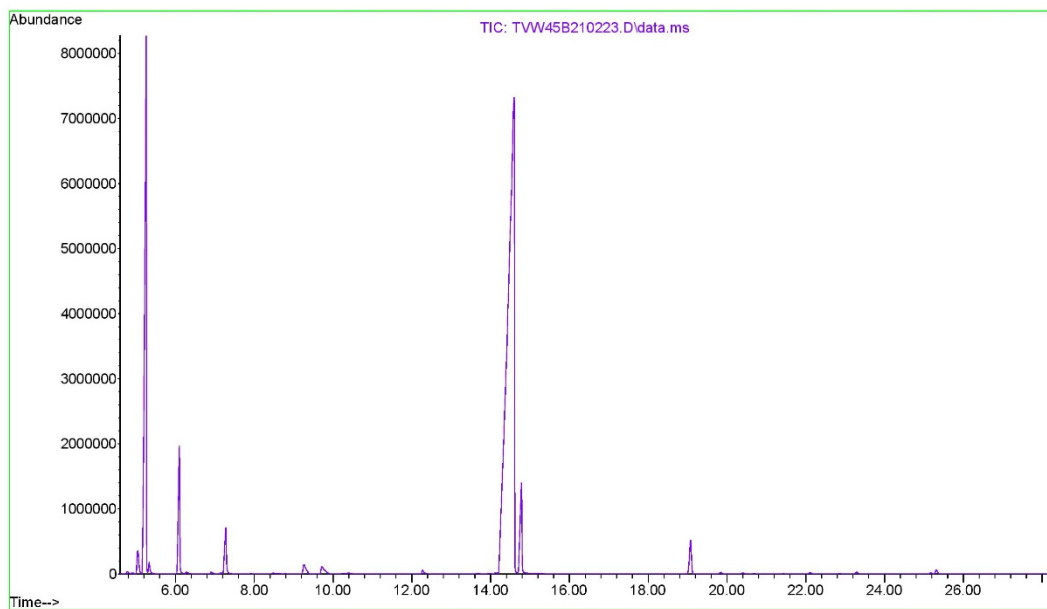

Figure 143 GC-MS chromatogram of *T. vulgaris* after 30 days of storage

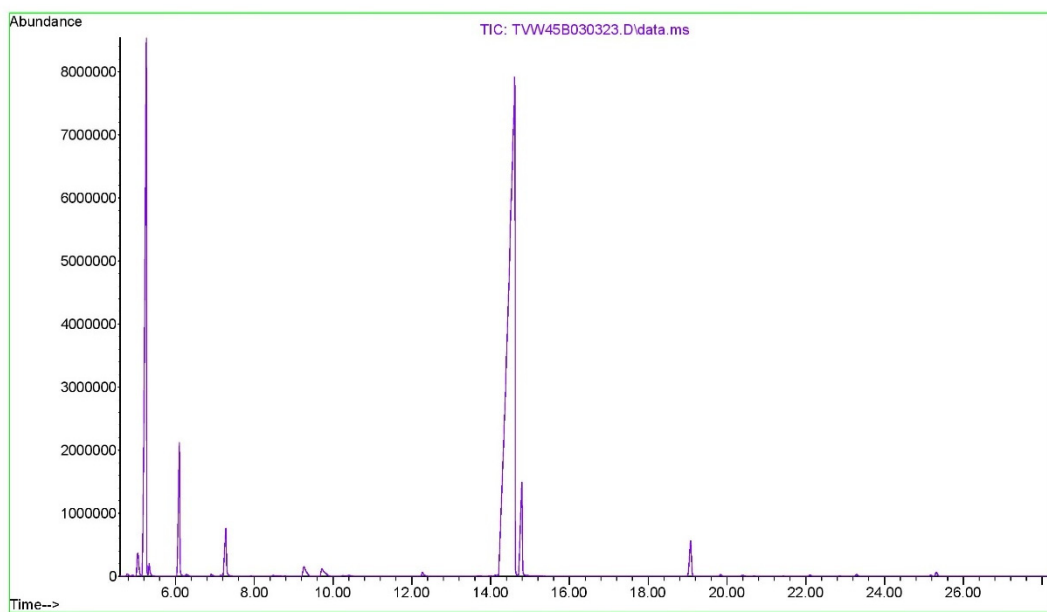

Figure 144 GC-MS chromatogram of *T. vulgaris* after 40 days of storage

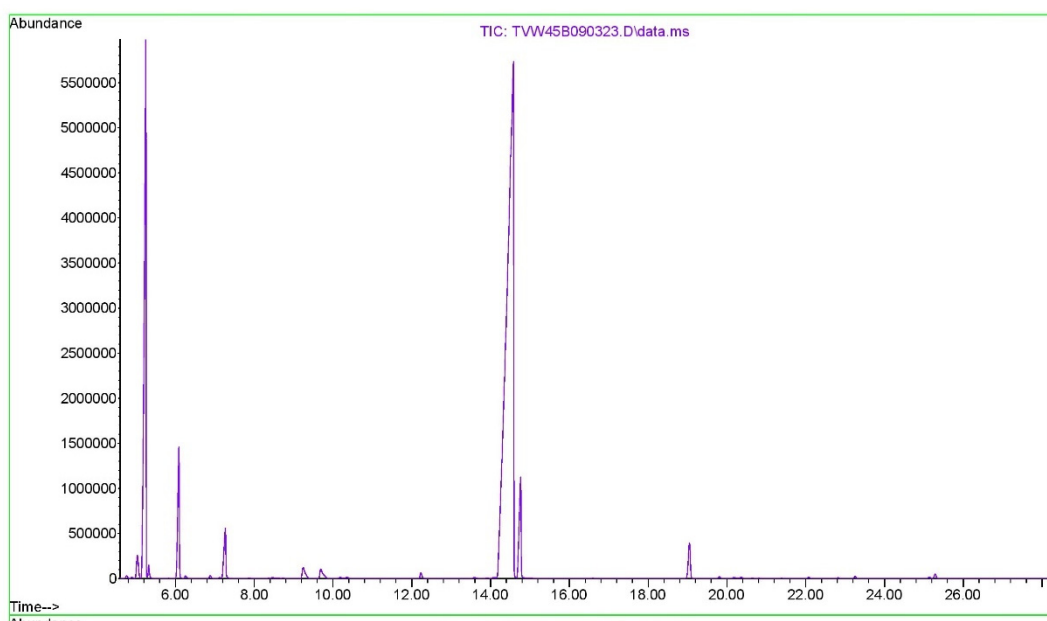

Figure 145 GC-MS chromatogram of *T. vulgaris* after 50 days of storage

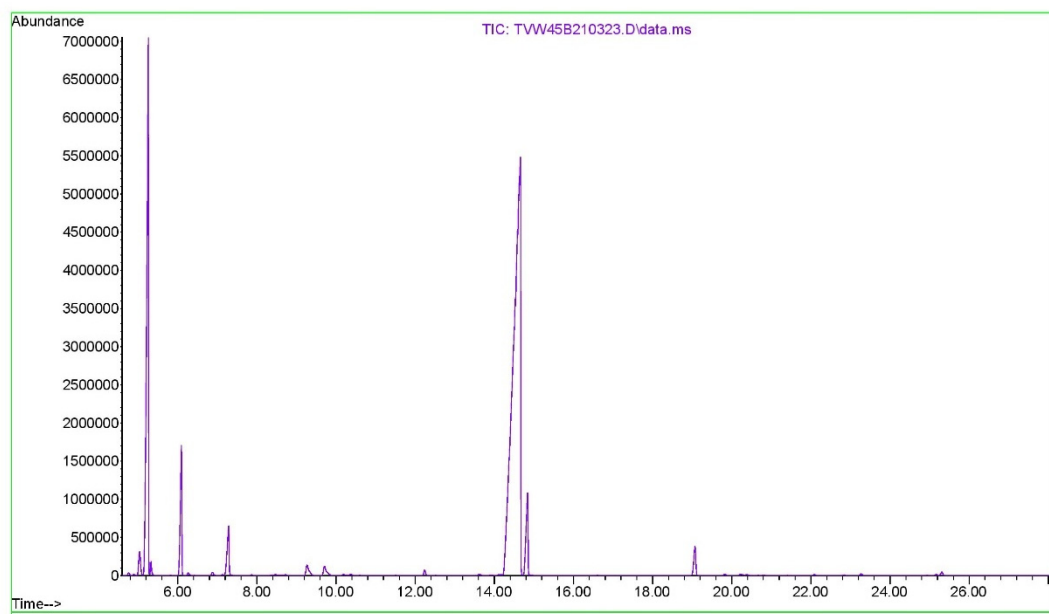

Figure 146 GC-MS chromatogram of *T. vulgaris* after 60 days of storage

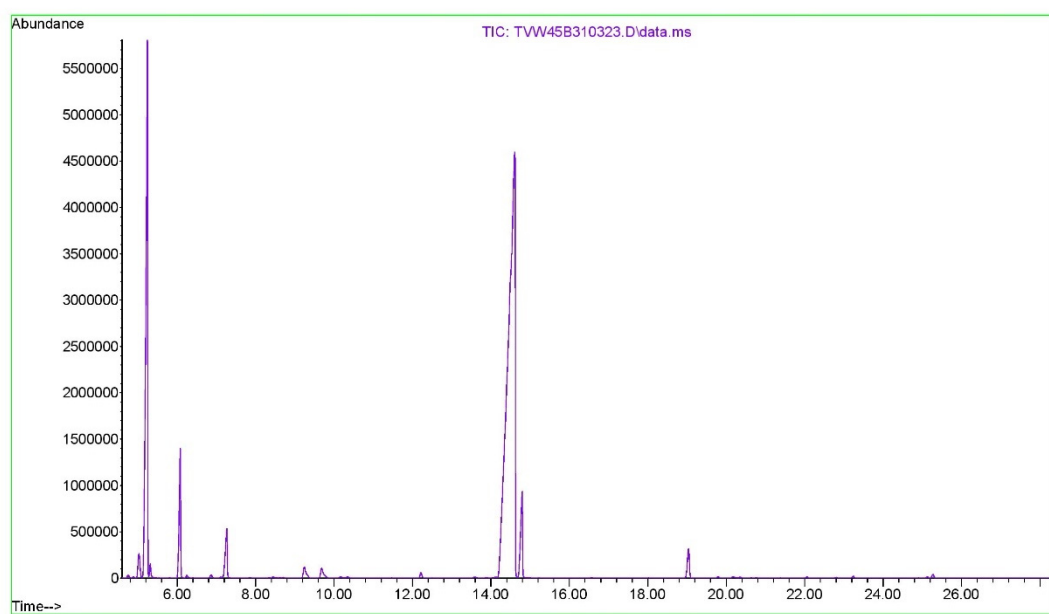

Figure 147 GC-MS chromatogram of *T. vulgaris* after 70 days of storage

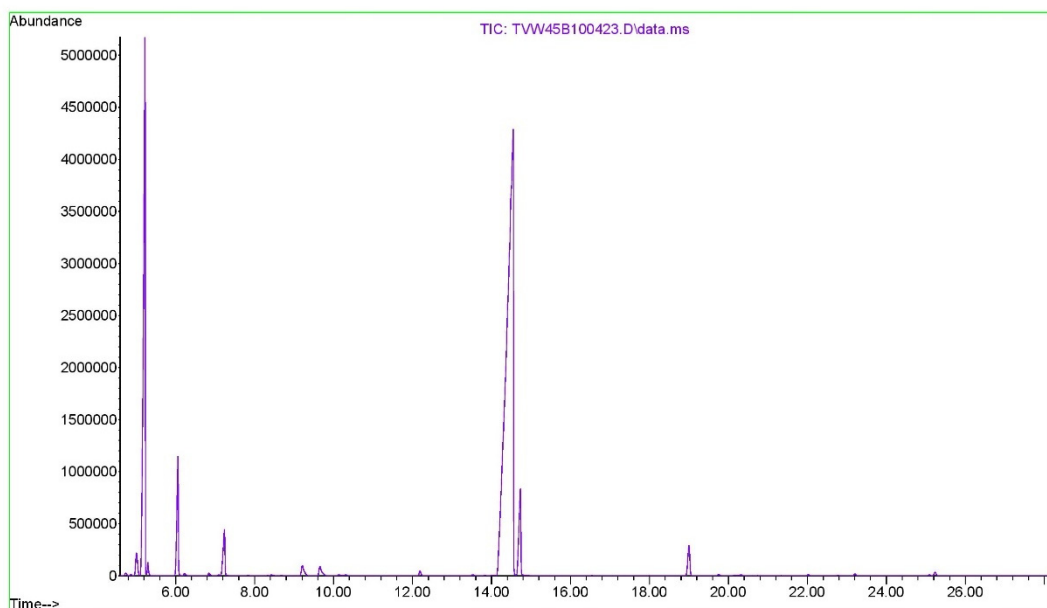

Figure 148 GC-MS chromatogram of *T. vulgaris* after 80 days of storage

#### 4.8. GC-MS chromatograms of the *T. vulgaris* essential oil during storage in glass tubes sealed with cap at 4 °C for 6 months

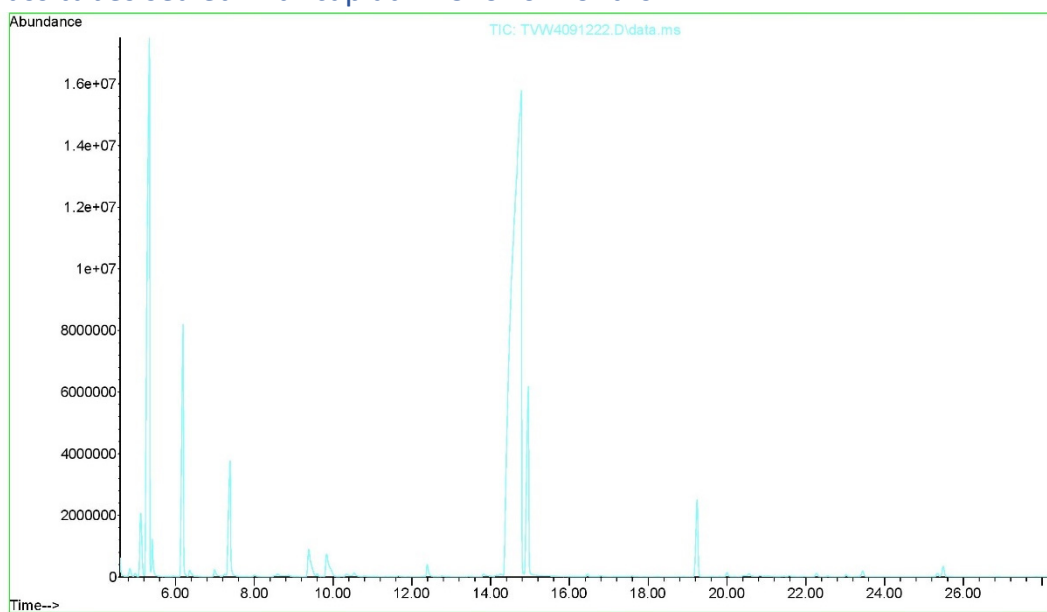

Figure 149 GC-MS chromatogram of *T. vulgaris* after 30 days of storage

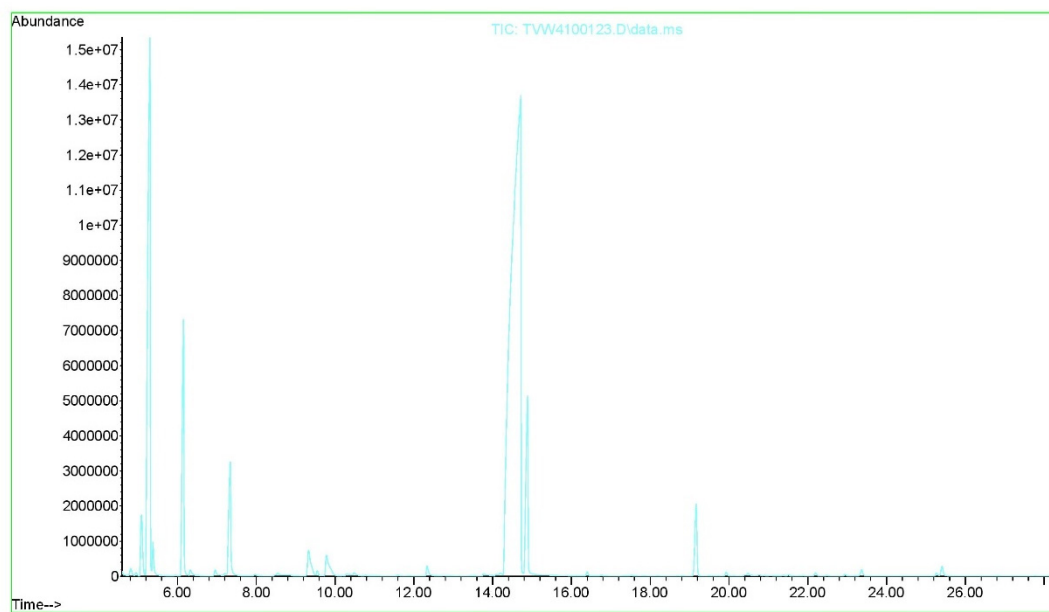

Figure 150 GC-MS chromatogram of *T. vulgaris* after 60 days of storage

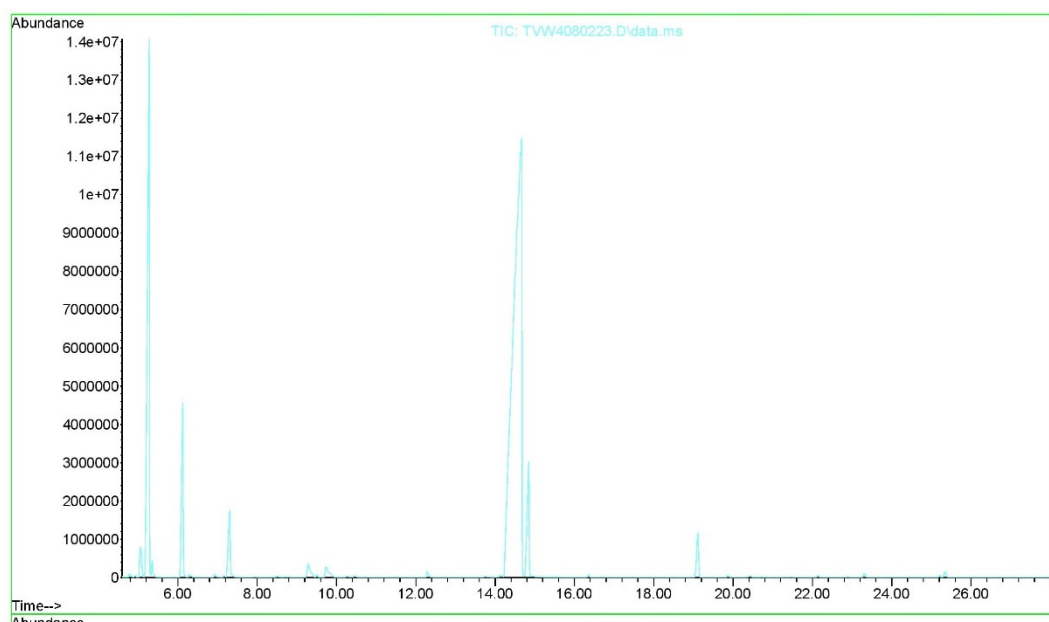

Figure 151 GC-MS chromatogram of *T. vulgaris* after 90 days of storage

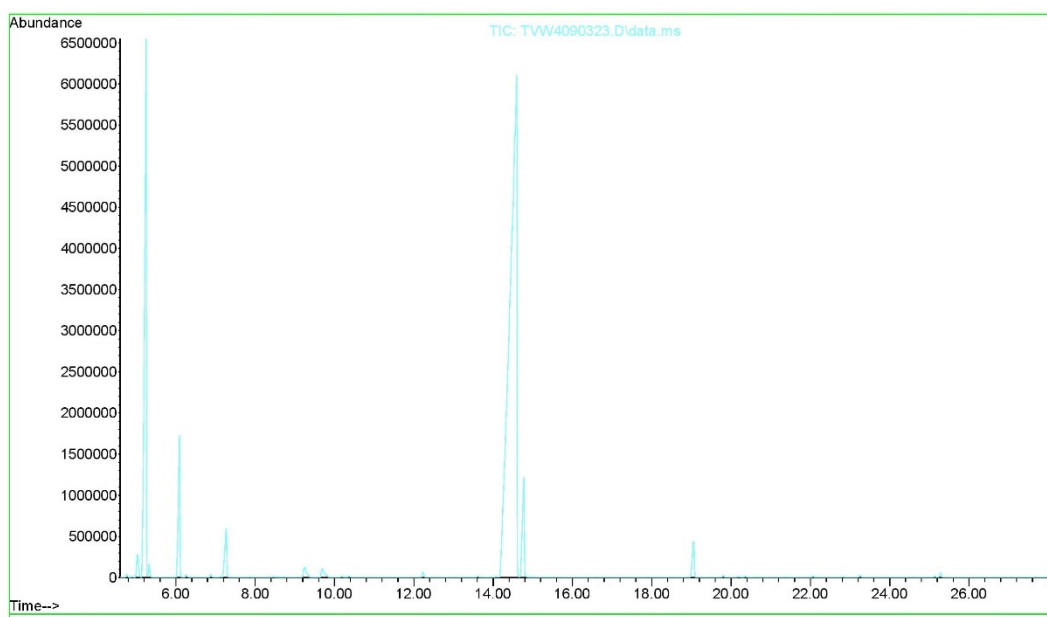

Figure 152 GC-MS chromatogram of *T. vulgaris* after 120 days of storage

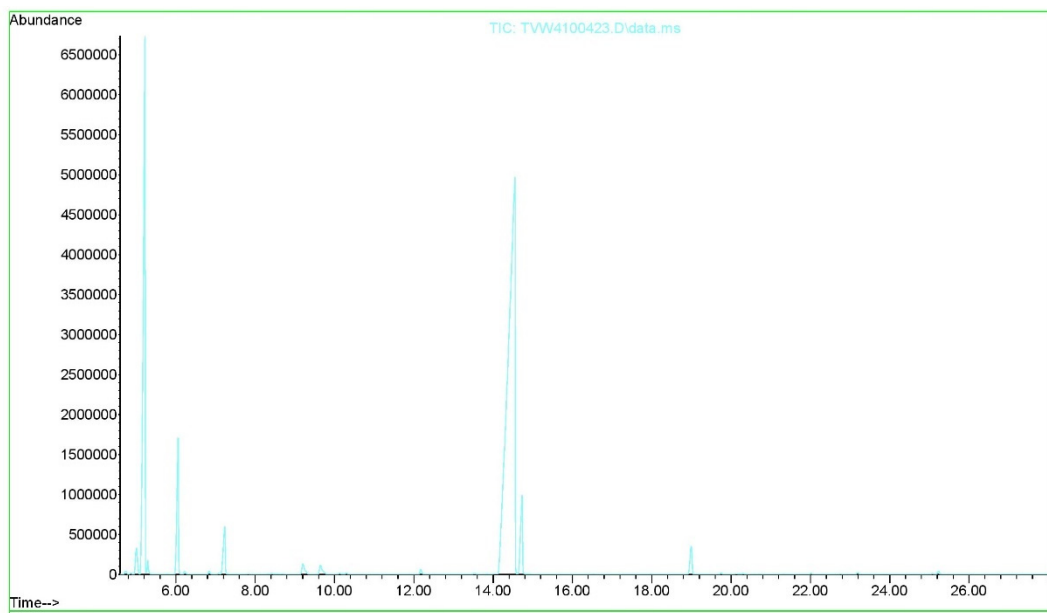

Figure 153 GC-MS chromatogram of *T. vulgaris* after 150 days of storage

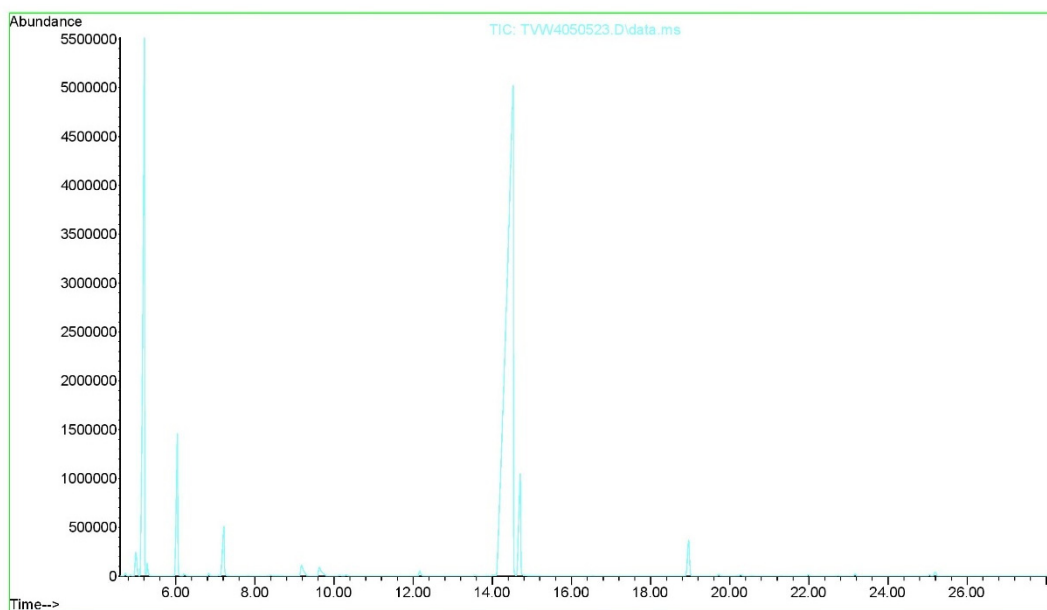

Figure 154 GC-MS chromatogram of *T. vulgaris* after 180 days of storage

#### 4.9. GC-MS chromatogram of the *T. vulgaris* essential oil during storage in metal container at 4 °C for 6 months

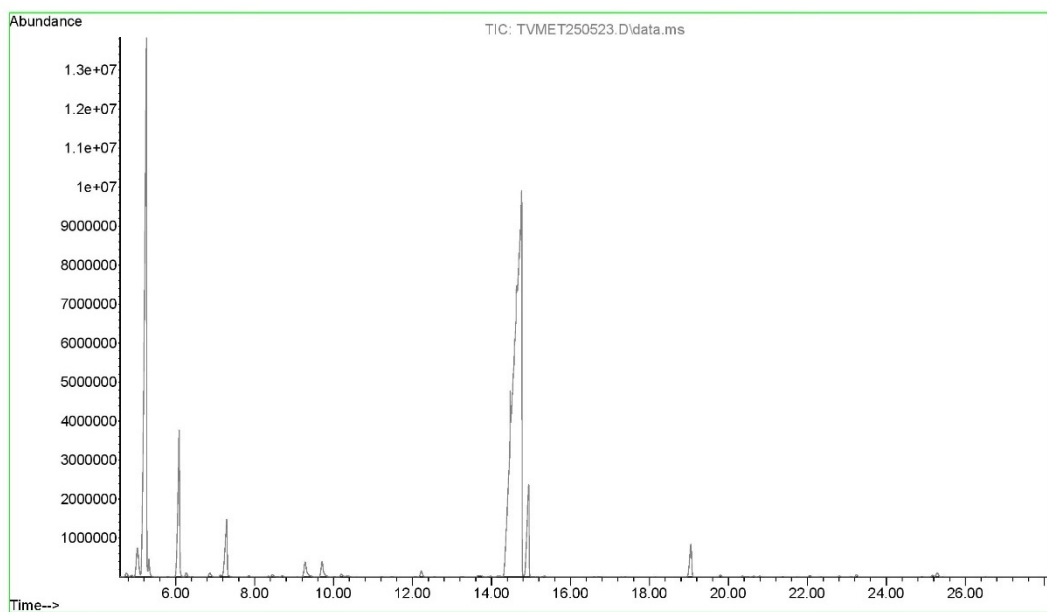

Figure 155 GC-MS chromatogram of *T. vulgaris* after 180 days of storage

4.10. GC-MS chromatogram of the *T. vulgaris* essential oil during storage in sealed glass ampoules at 4 °C for 6 months

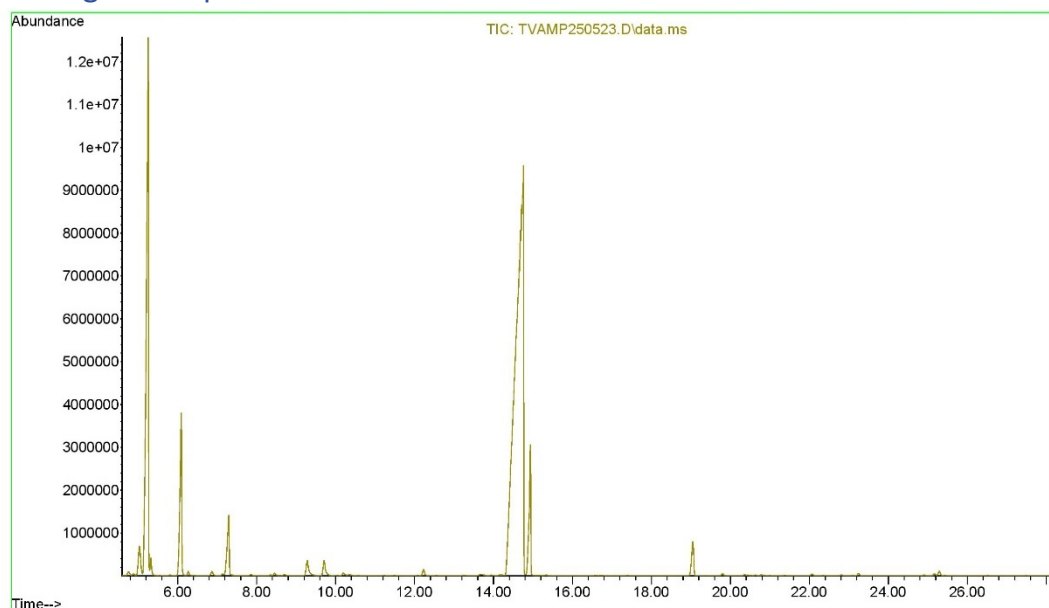

Figure 156 GC-MS chromatogram of *T. vulgaris* after 180 days of storage

4.11. GC-MS chromatogram of the *T. vulgaris* essential oil during storage in glass tubes sealed with cap at -20 °C for 6 months

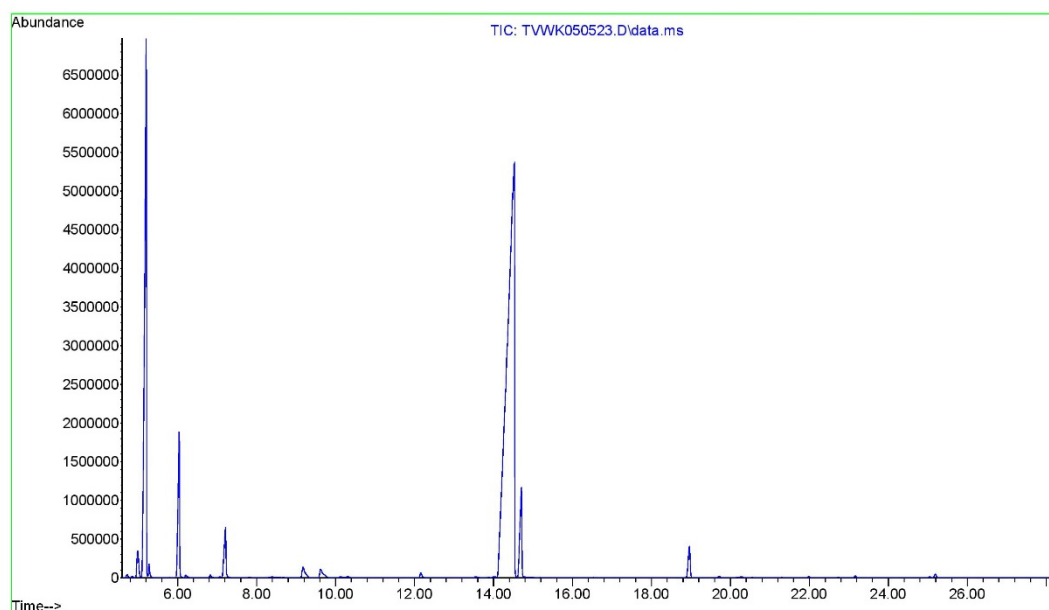

Figure 157 GC-MS chromatogram of *T. vulgaris* after 180 days of storage

## 5. GC-MS chromatograms of the *Mentha spicata* L. essential oil

### 5.1. GC-MS chromatogram of the initial *M. spicata* essential oil

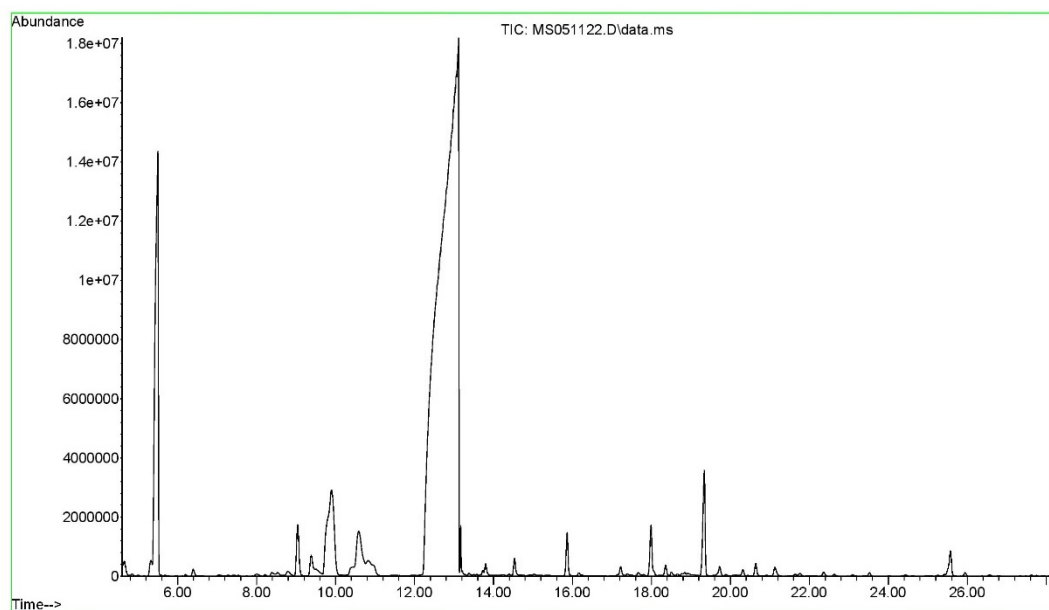

Figure 158 GC-MS chromatogram of *M. spicata* before storage

### 5.2. GC-MS chromatograms of the *M. spicata* essential oil during storage in glass tubes sealed with cap at room temperature (23 °C) under darkness for 6 months

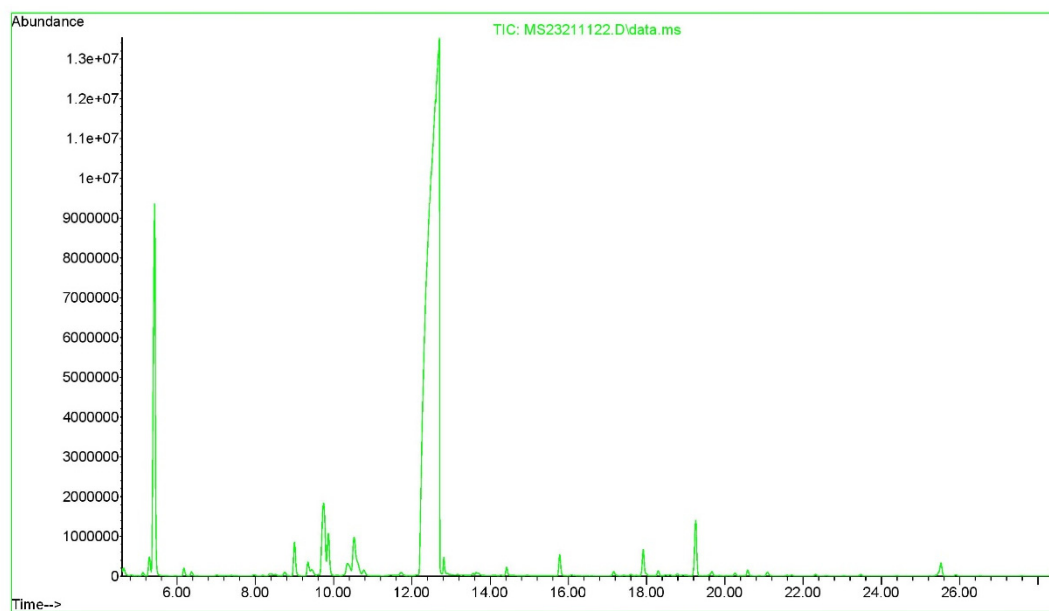

Figure 159 GC-MS chromatogram of *M. spicata* after 10 days of storage

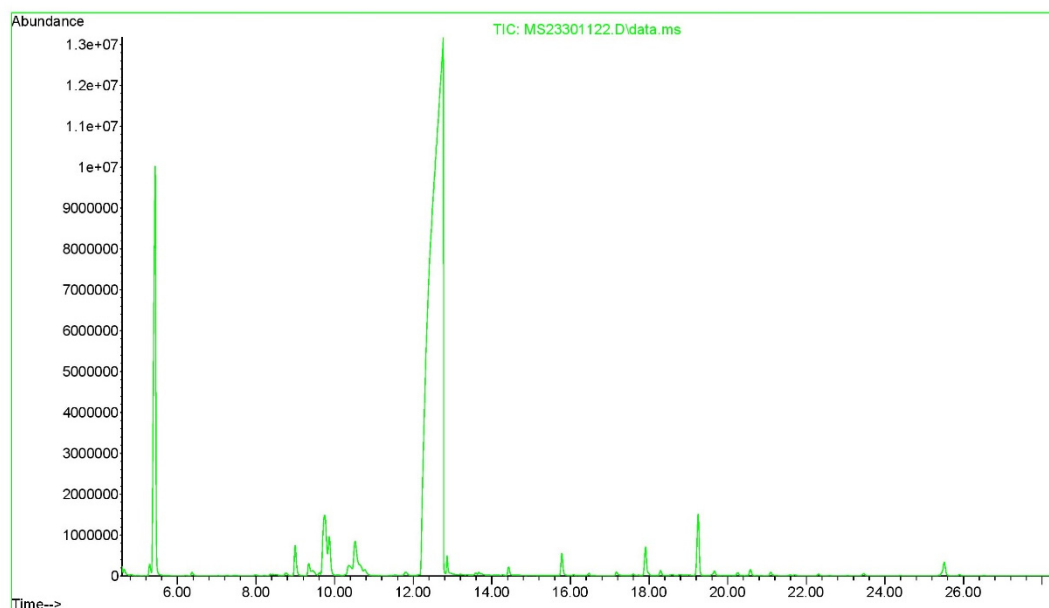

Figure 160 GC-MS chromatogram of *M. spicata* after 20 days of storage

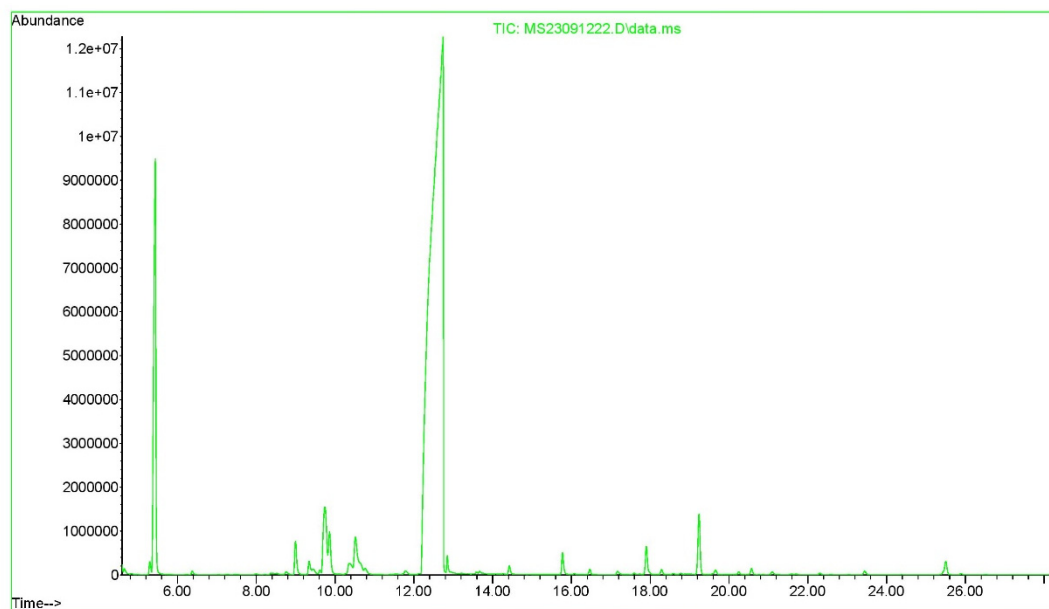

Figure 161 GC-MS chromatogram of *M. spicata* after 30 days of storage

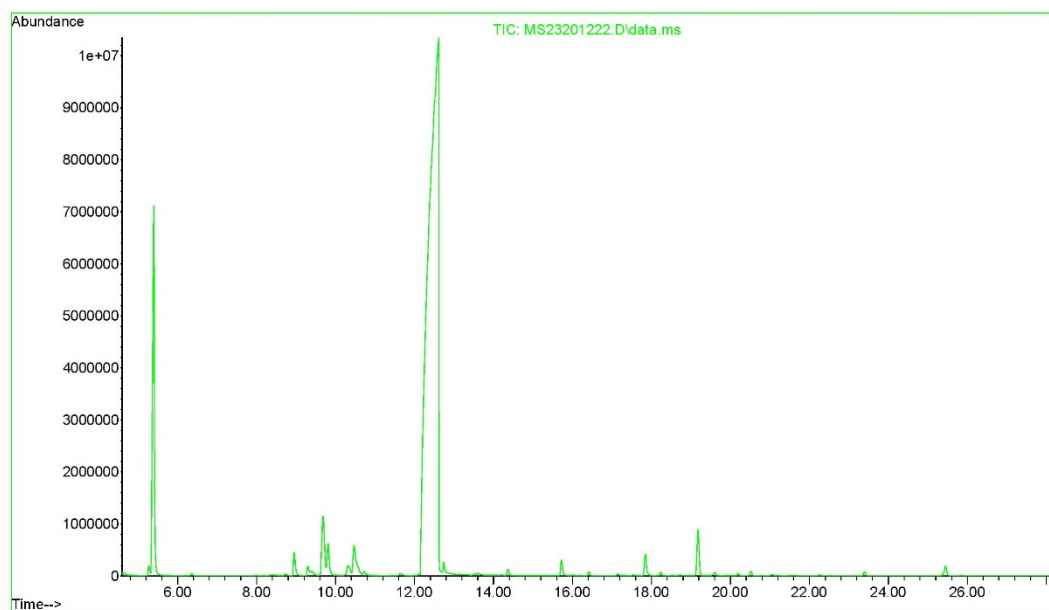

Figure 162 GC-MS chromatogram of *M. spicata* after 40 days of storage

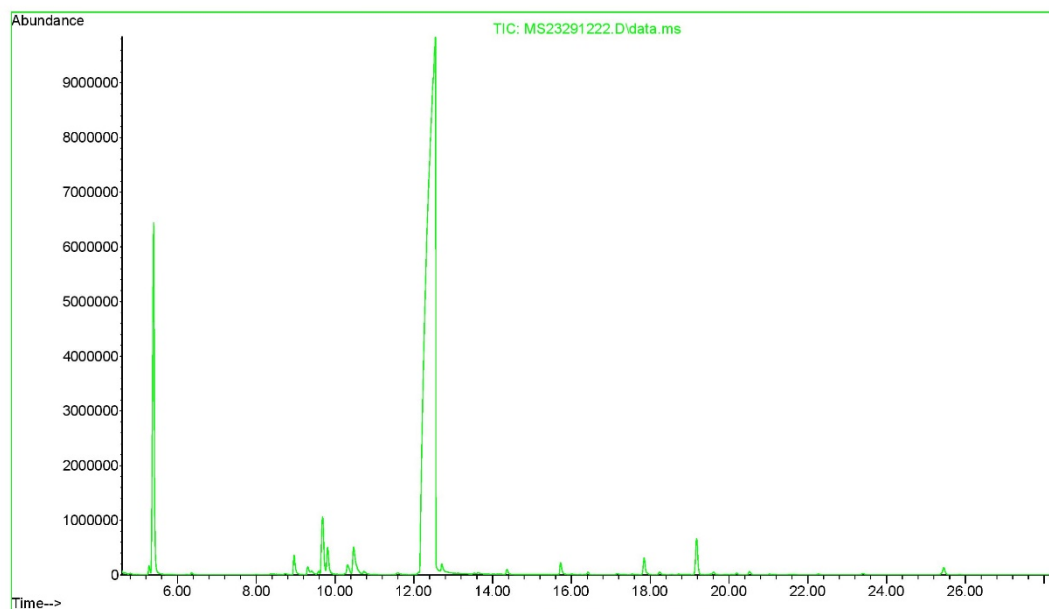

Figure 163 GC-MS chromatogram of *M. spicata* after 50 days of storage

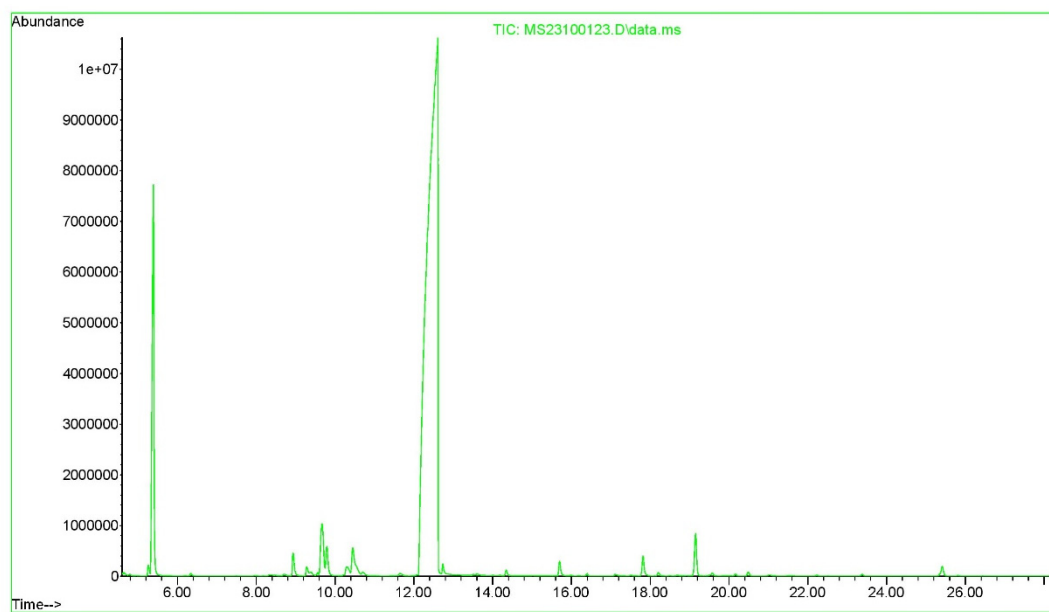

Figure 164 GC-MS chromatogram of *M. spicata* after 60 days of storage

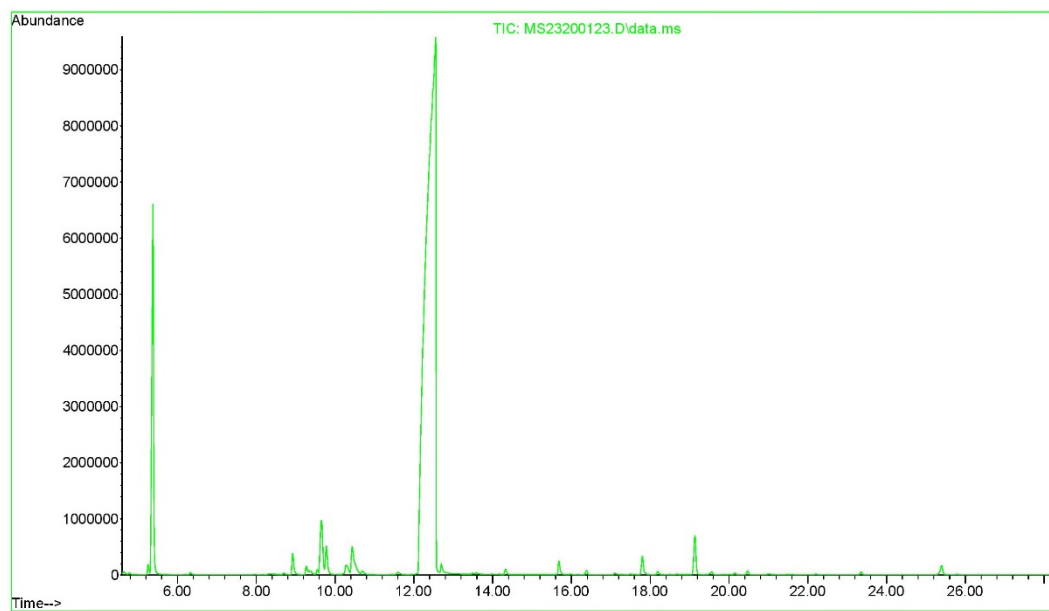

Figure 165 GC-MS chromatogram of *M. spicata* after 70 days of storage

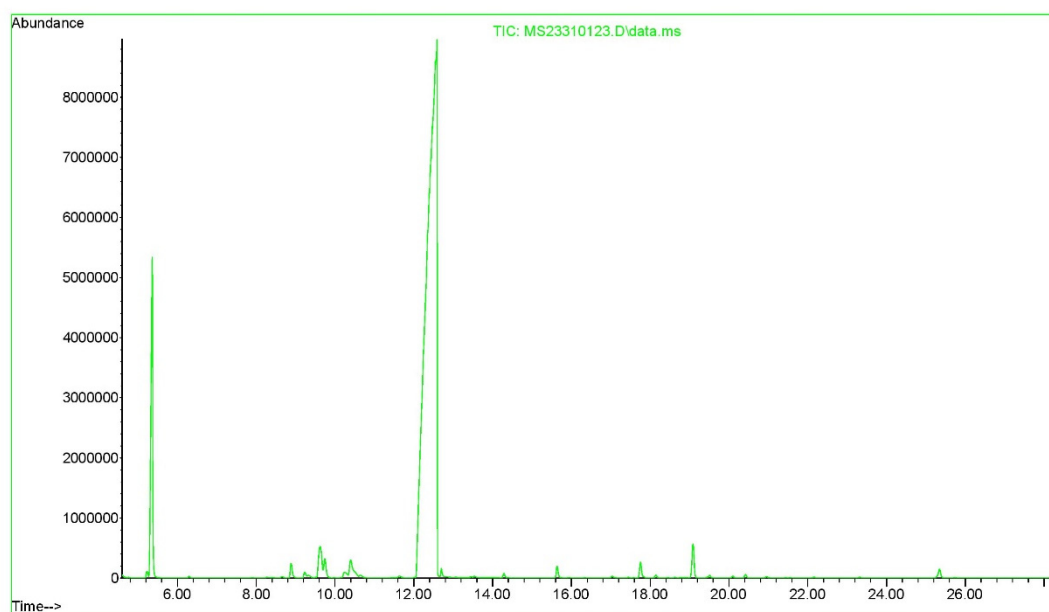

Figure 166 GC-MS chromatogram of *M. spicata* after 80 days of storage

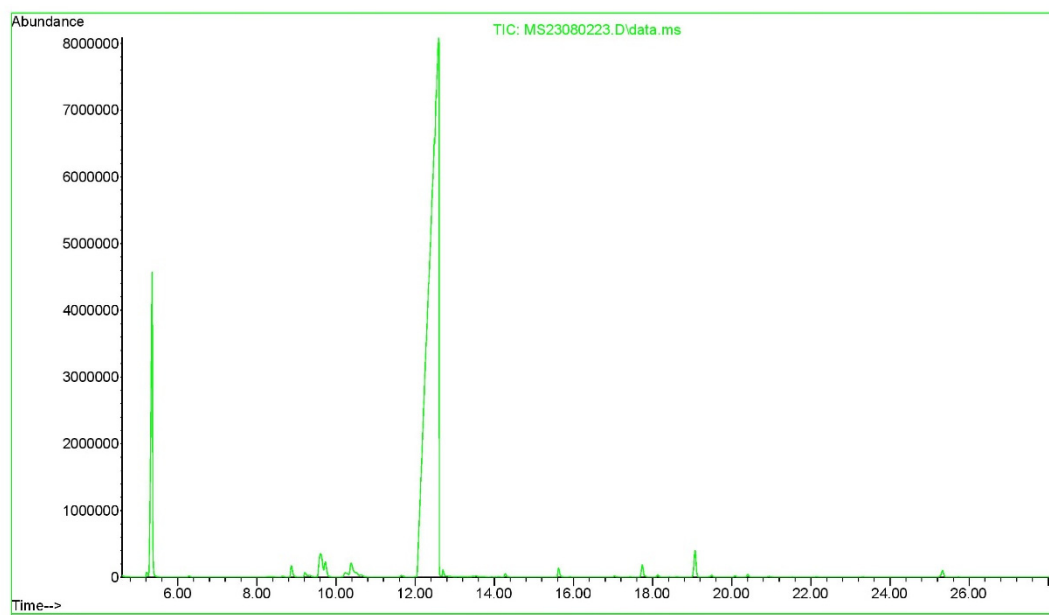

Figure 167 GC-MS chromatogram of *M. spicata* after 90 days of storage

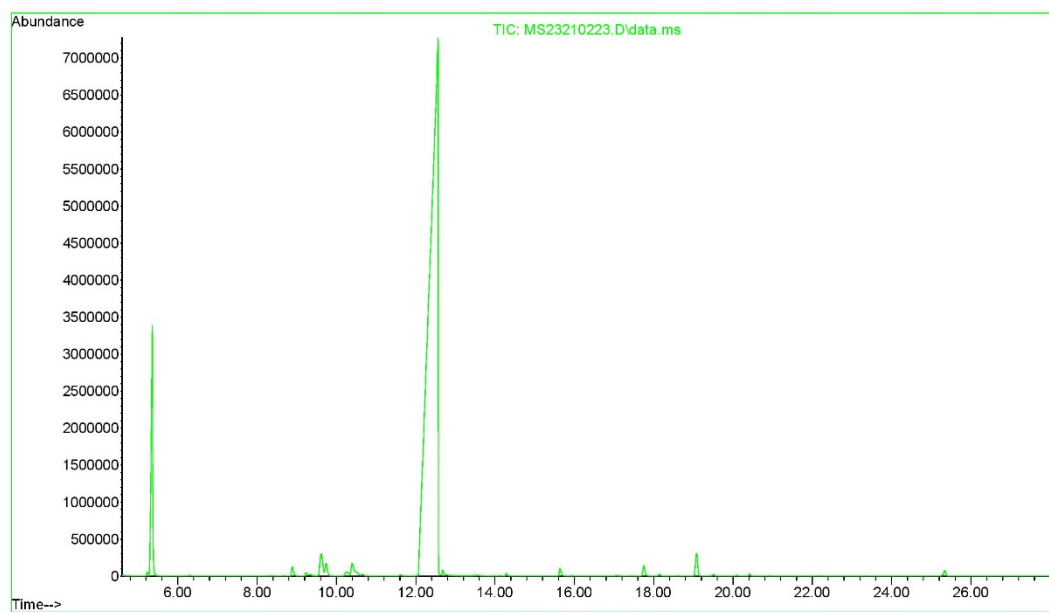

Figure 168 GC-MS chromatogram of *M. spicata* after 100 days of storage

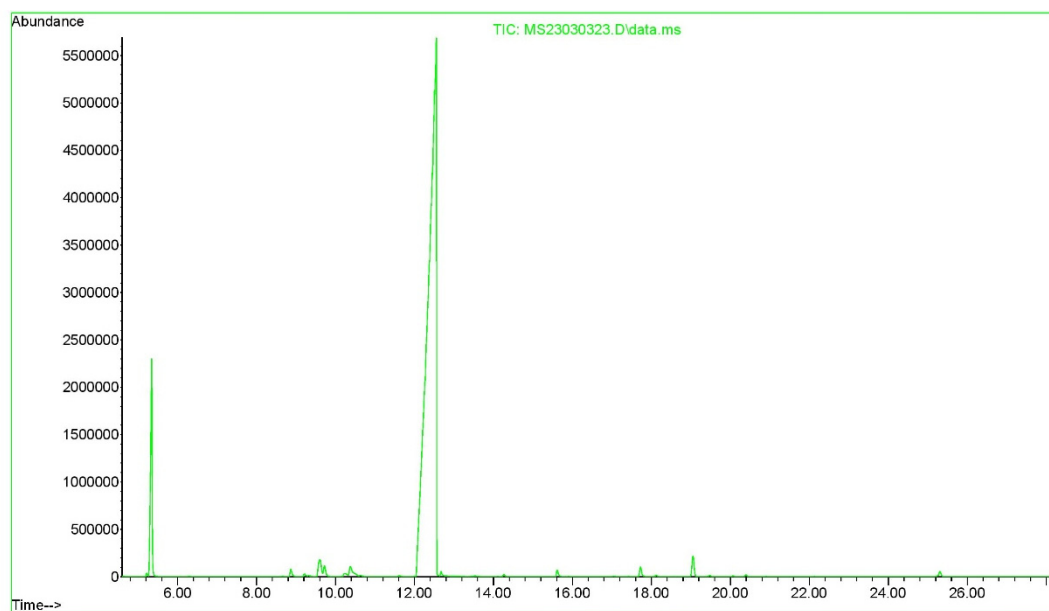

Figure 169 GC-MS chromatogram of *M. spicata* after 110 days of storage

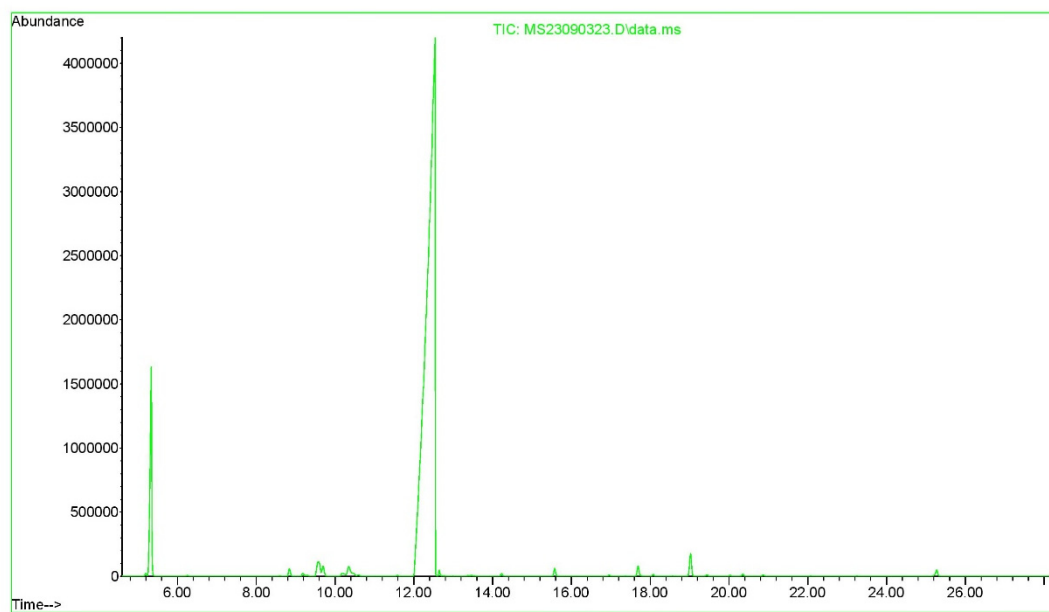

Figure 170 GC-MS chromatogram of *M. spicata* after 120 days of storage

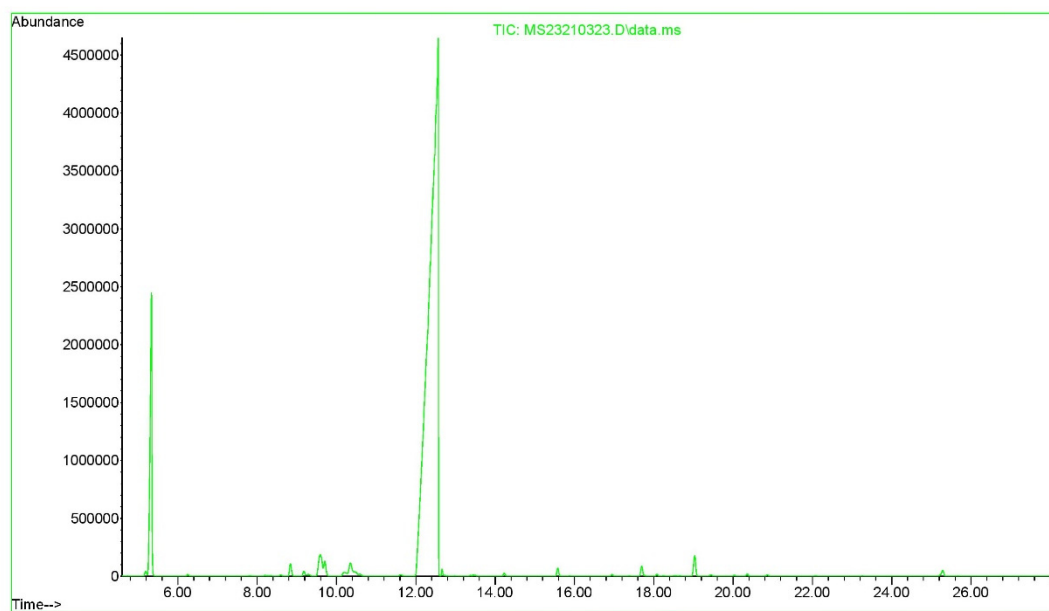

Figure 171 GC-MS chromatogram of *M. spicata* after 130 days of storage

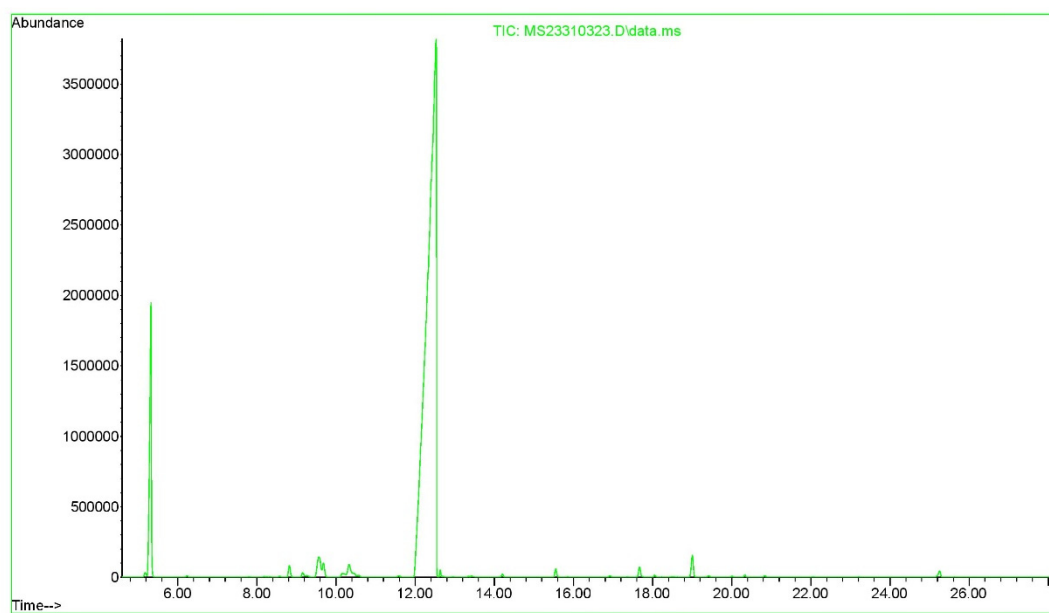

Figure 172 GC-MS chromatogram of *M. spicata* after 140 days of storage

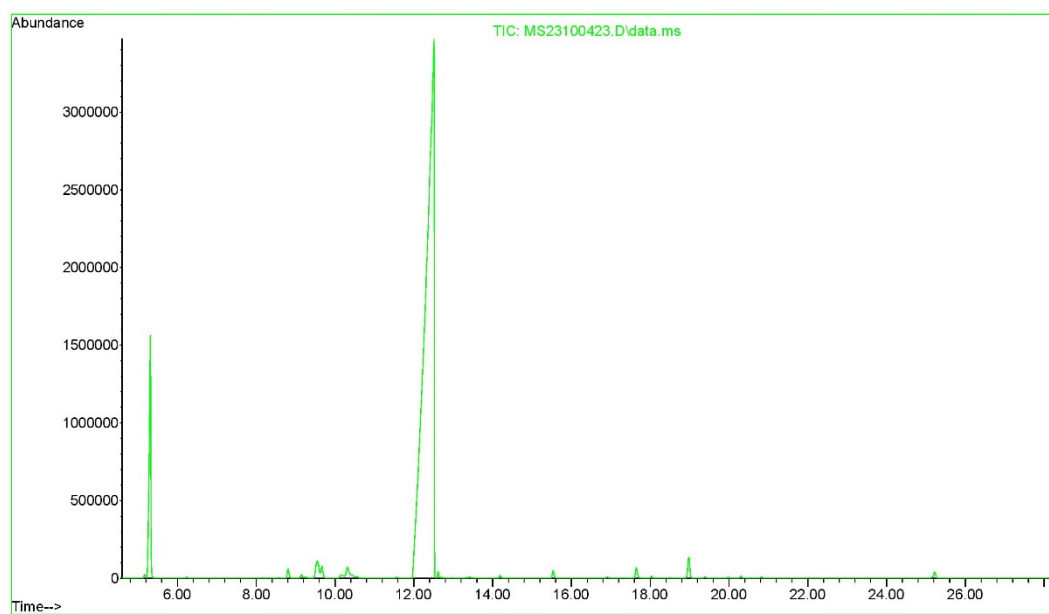

Figure 173 GC-MS chromatogram of *M. spicata* after 150 days of storage

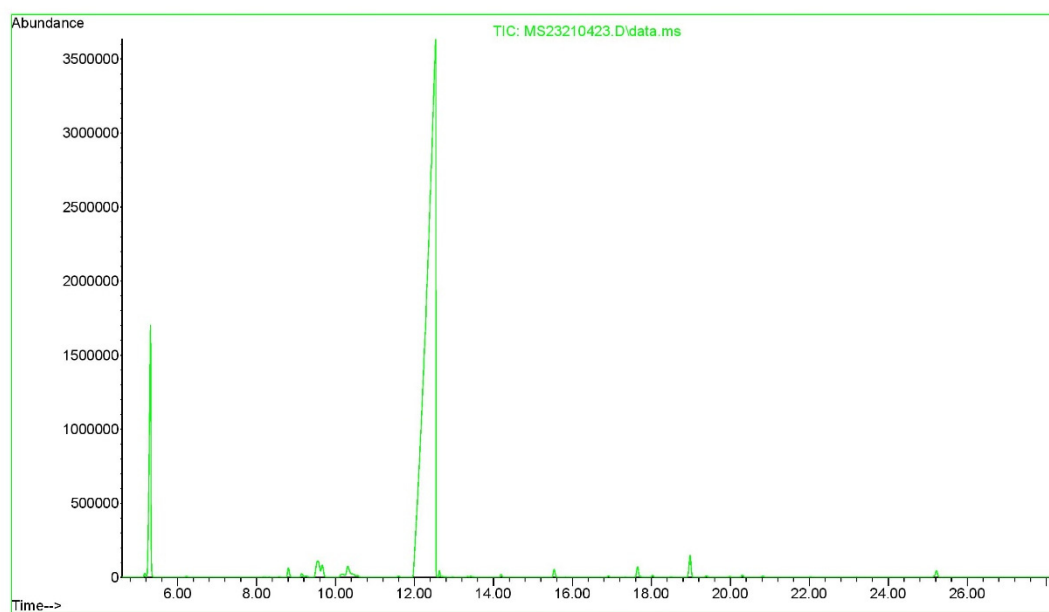

Figure 174 GC-MS chromatogram of *M. spicata* after 160 days of storage

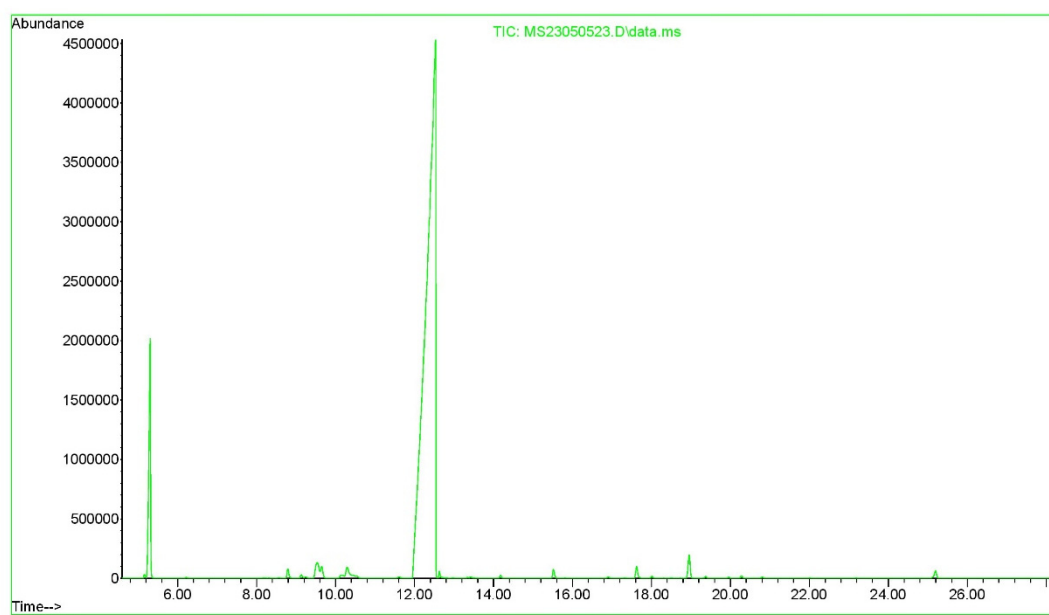

Figure 175 GC-MS chromatogram of *M. spicata* after 170 days of storage

### 5.3. GC-MS chromatograms of the *M. spicata* essential oil during storage in glass tubes sealed with cap under direct sunlight exposure for 6 months

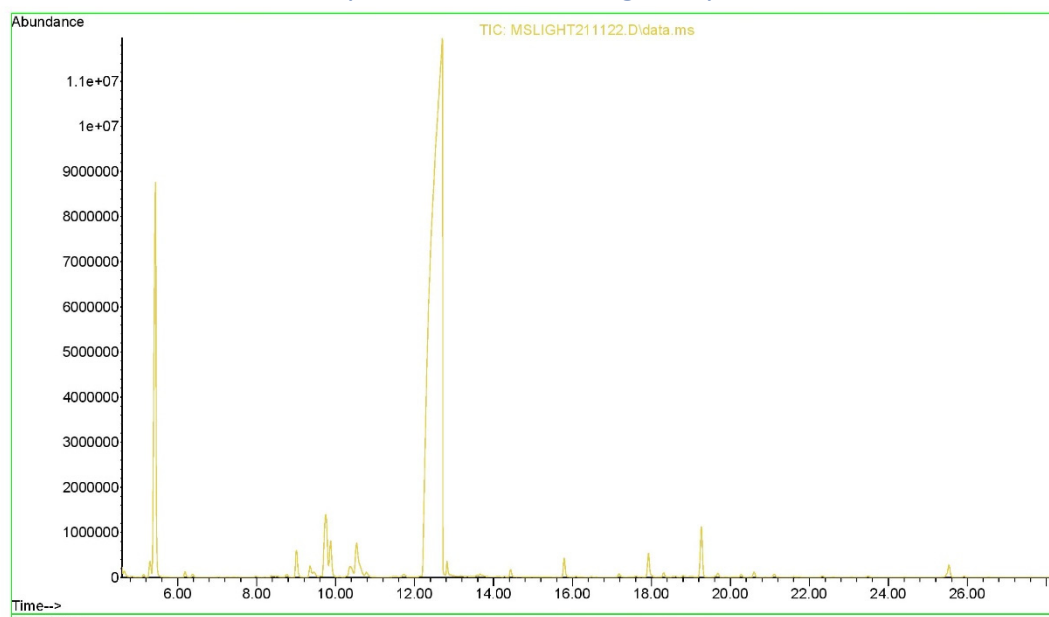

Figure 176 GC-MS chromatogram of *M. spicata* after 10 days of storage

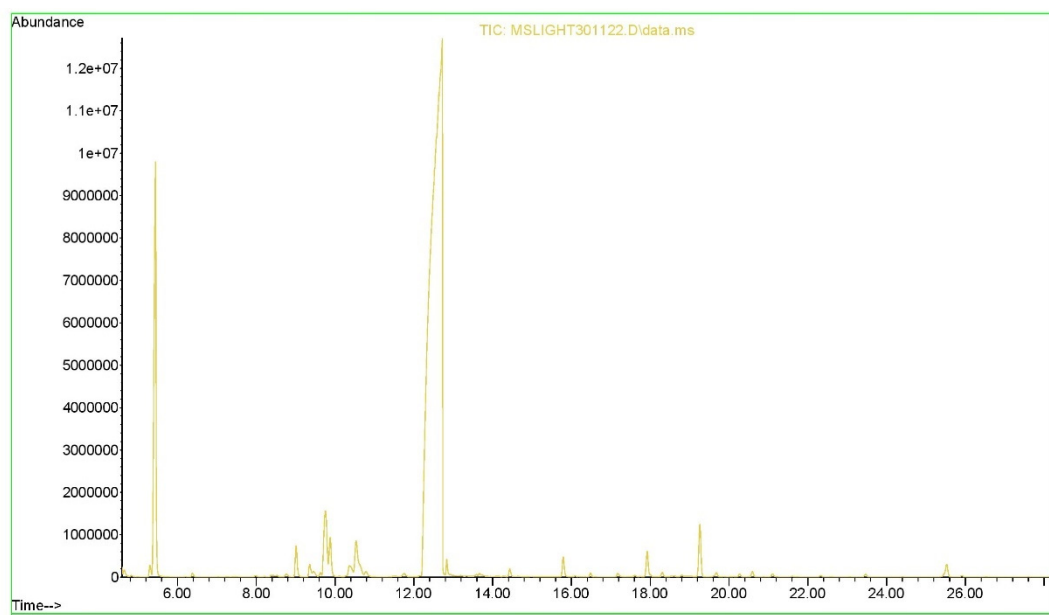

Figure 177 GC-MS chromatogram of *M. spicata* after 20 days of storage

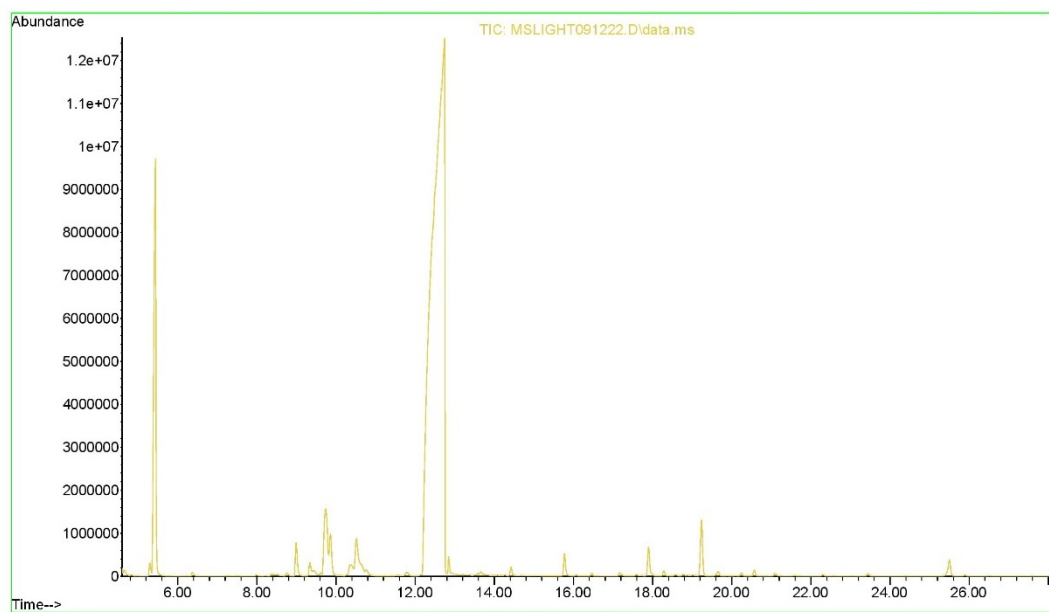

Figure 178 GC-MS chromatogram of *M. spicata* after 30 days of storage

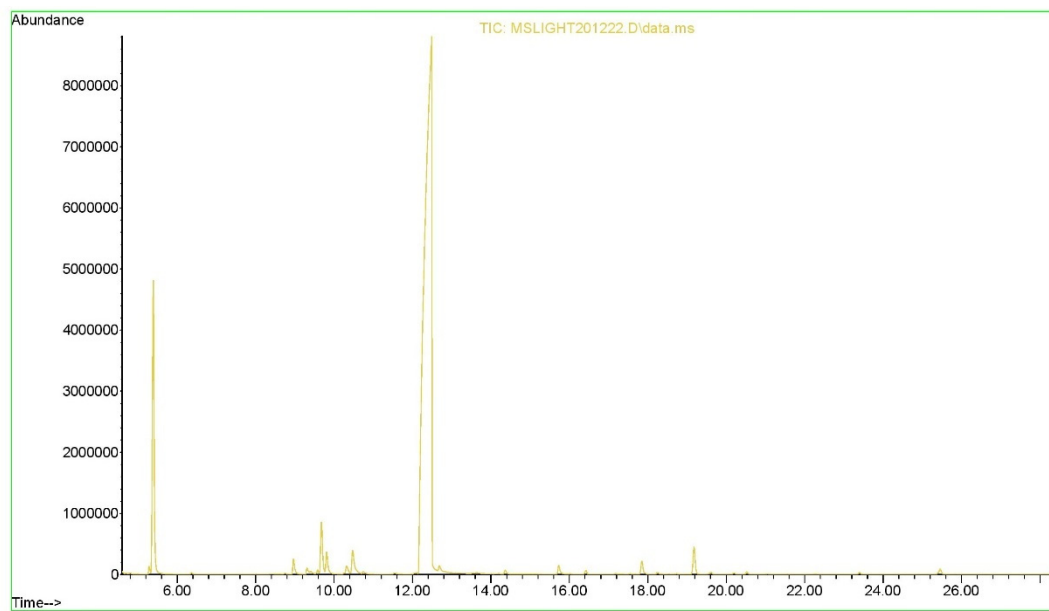

Figure 179 GC-MS chromatogram of *M. spicata* after 40 days of storage

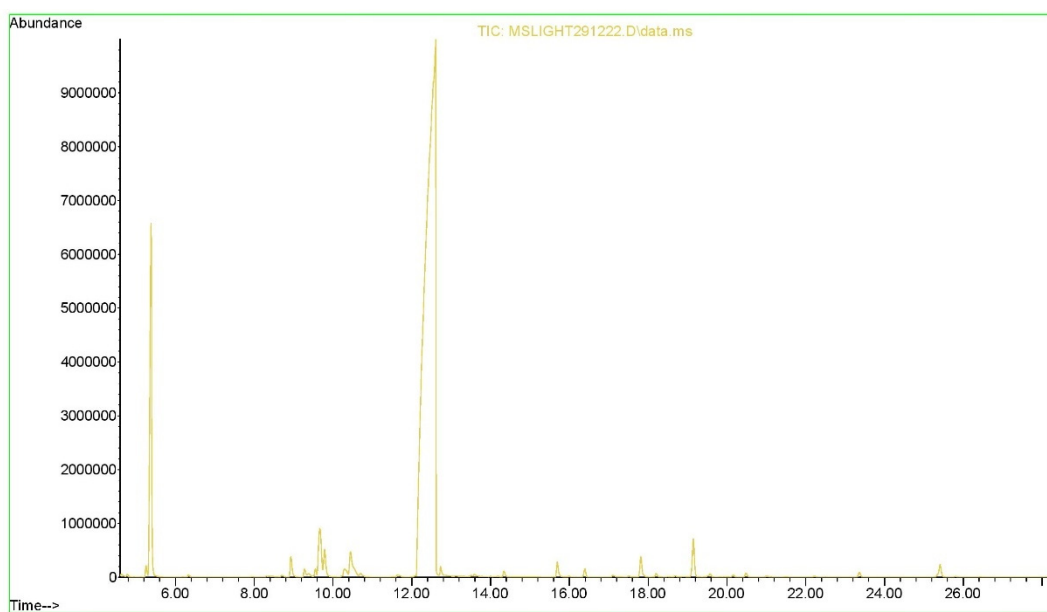

Figure 180 GC-MS chromatogram of *M. spicata* after 50 days of storage

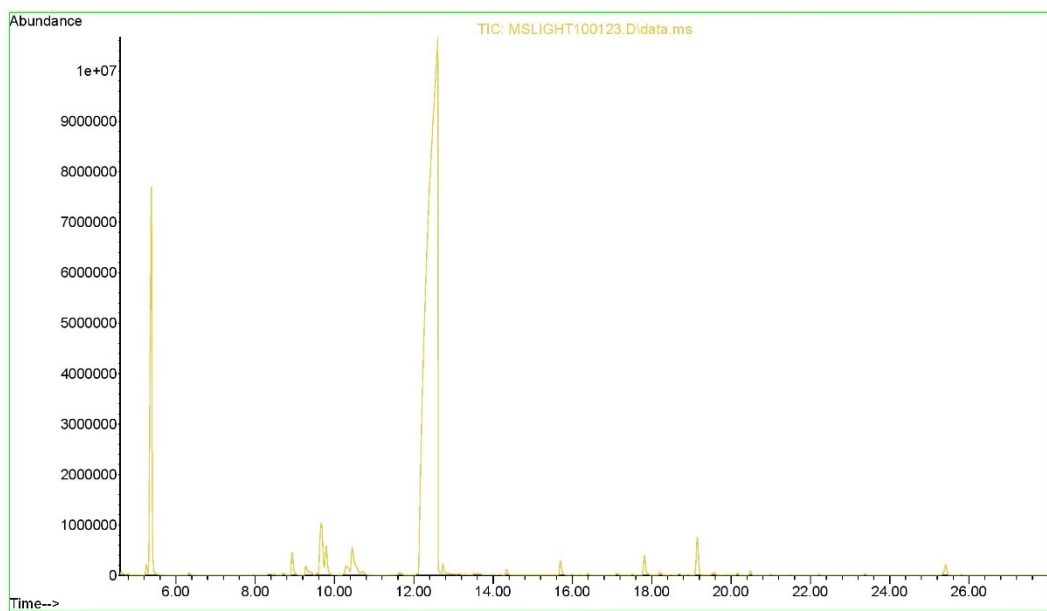

Figure 181 GC-MS chromatogram of *M. spicata* after 60 days of storage

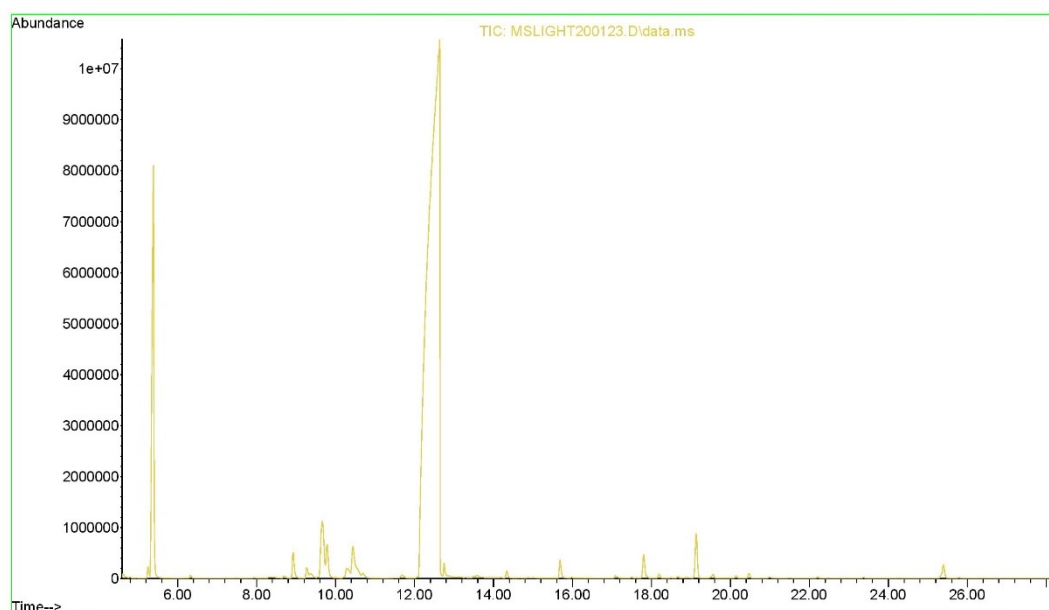

Figure 182 GC-MS chromatogram of *M. spicata* after 70 days of storage

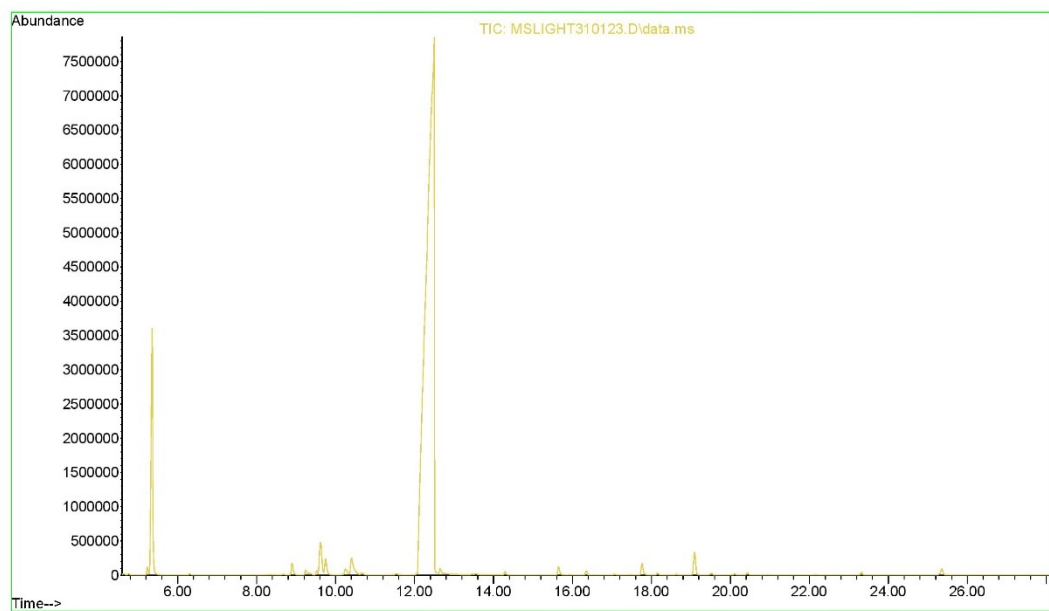

Figure 183 GC-MS chromatogram of *M. spicata* after 80 days of storage

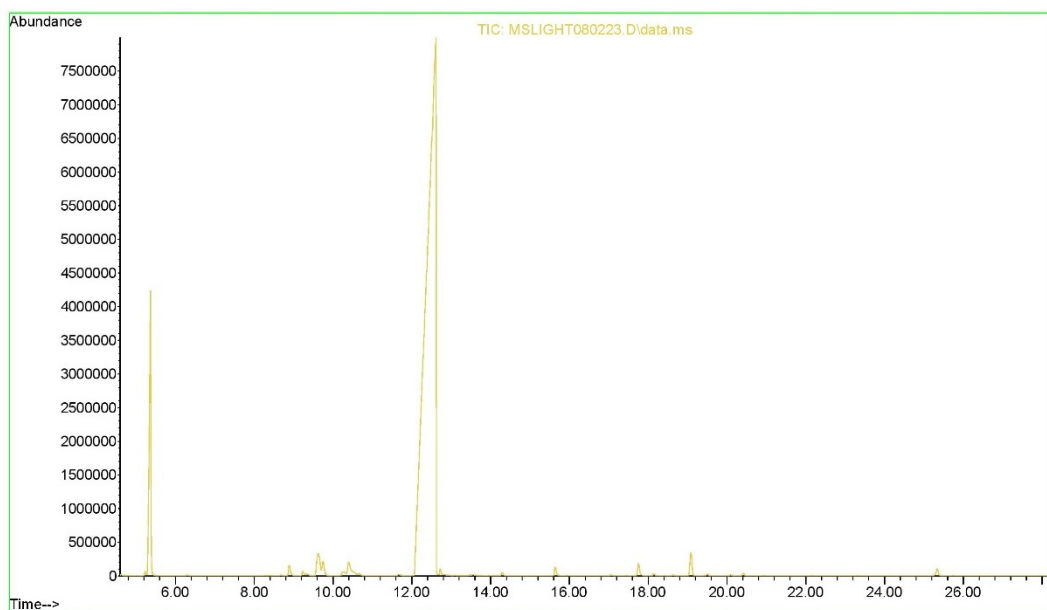

Figure 184 GC-MS chromatogram of *M. spicata* after 90 days of storage

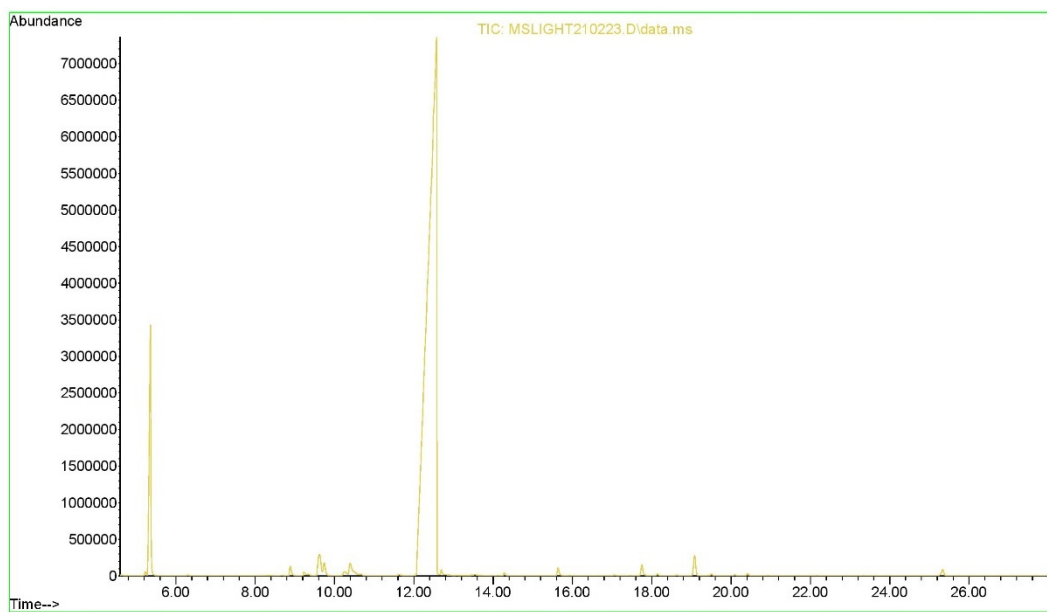

Figure 185 GC-MS chromatogram of *M. spicata* after 100 days of storage

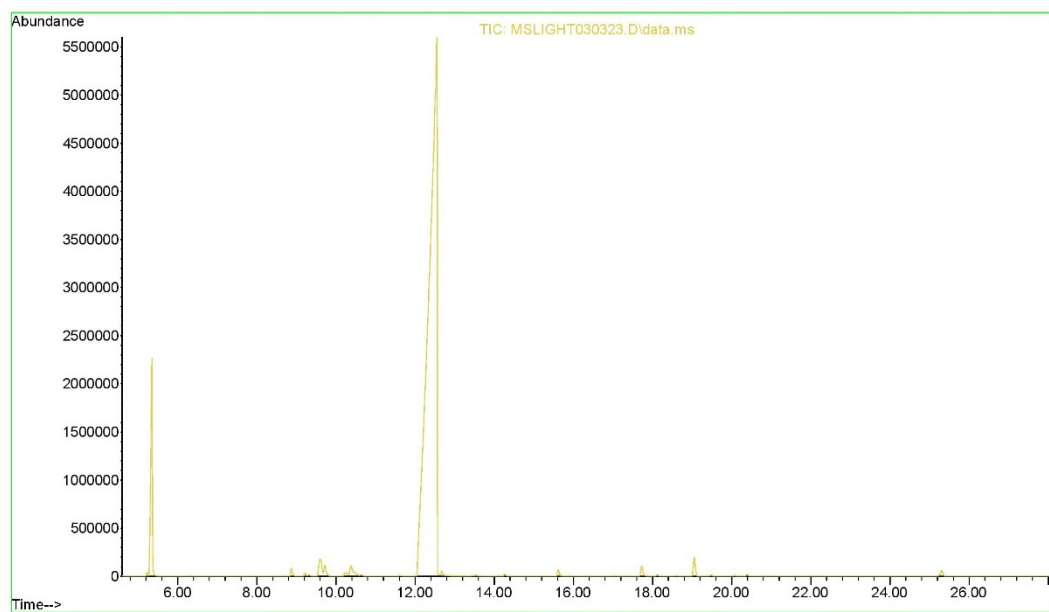

Figure 186 GC-MS chromatogram of *M. spicata* after 110 days of storage

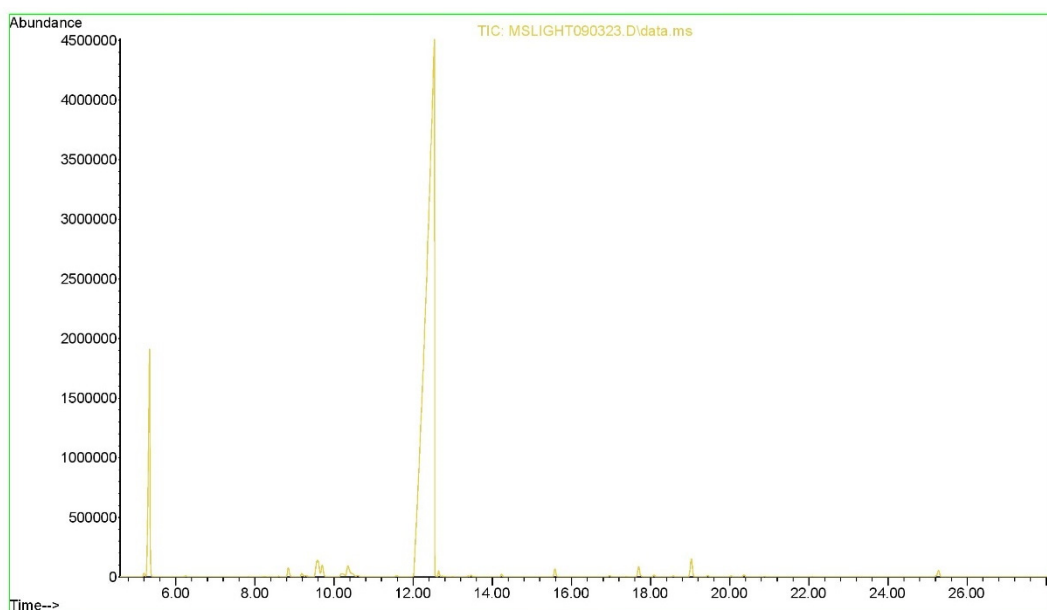

Figure 187 GC-MS chromatogram of *M. spicata* after 120 days of storage

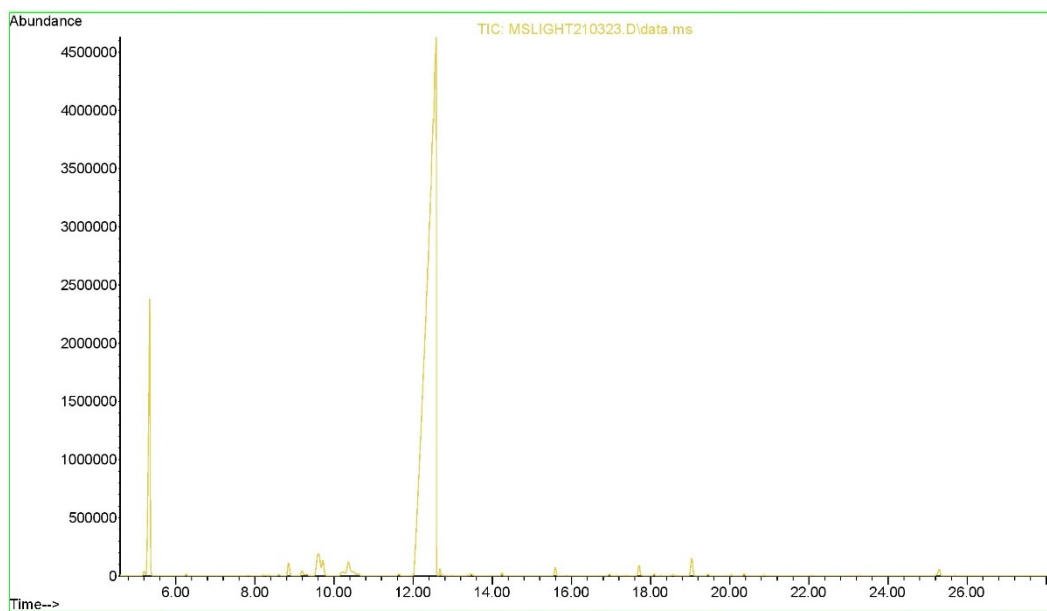

Figure 188 GC-MS chromatogram of *M. spicata* after 130 days of storage

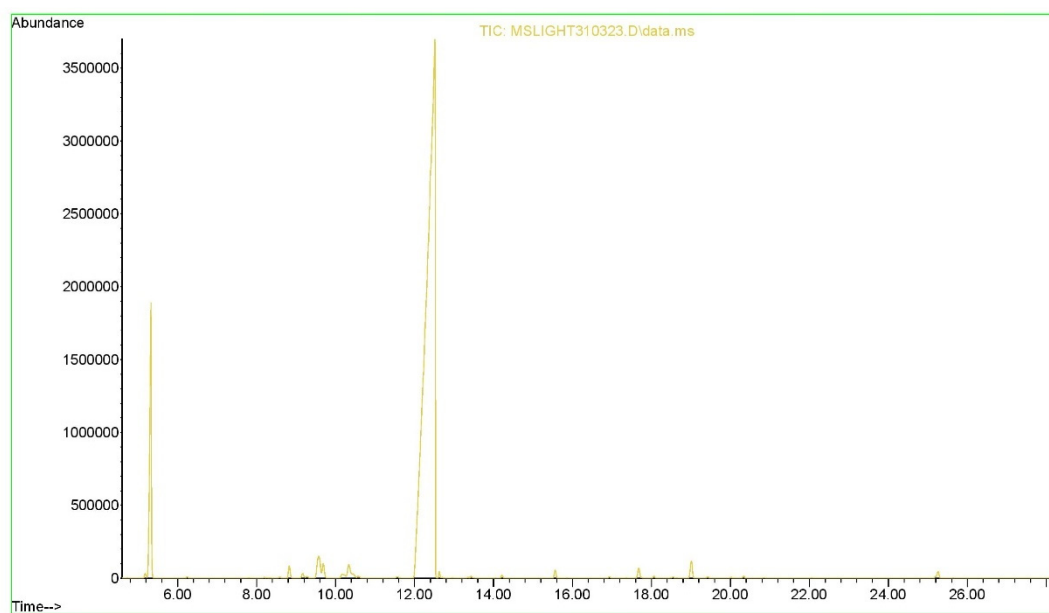

Figure 189 GC-MS chromatogram of *M. spicata* after 140 days of storage

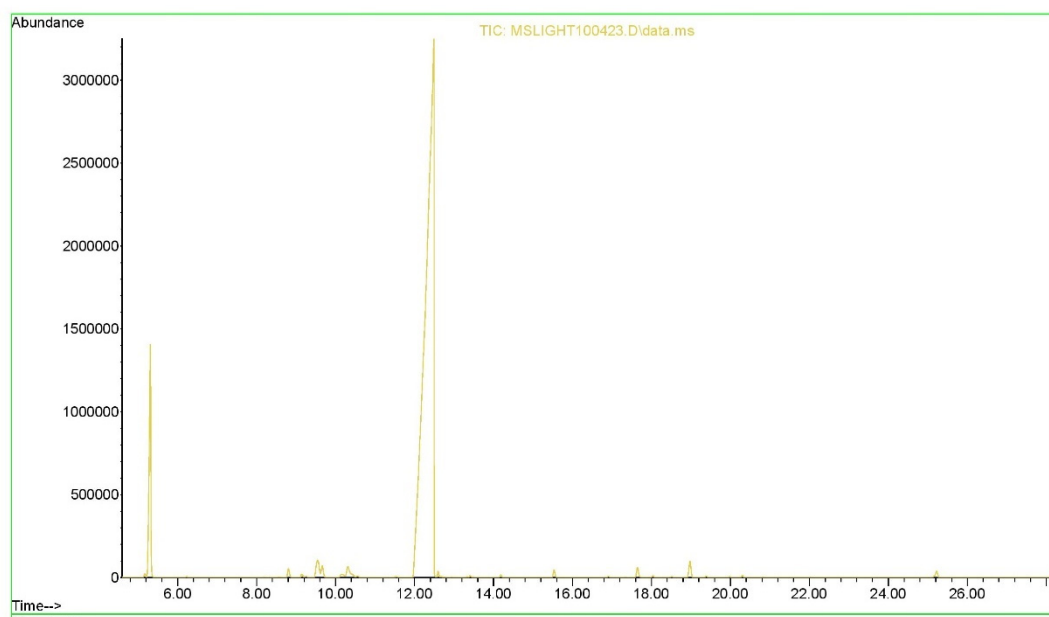

Figure 190 GC-MS chromatogram of *M. spicata* after 150 days of storage

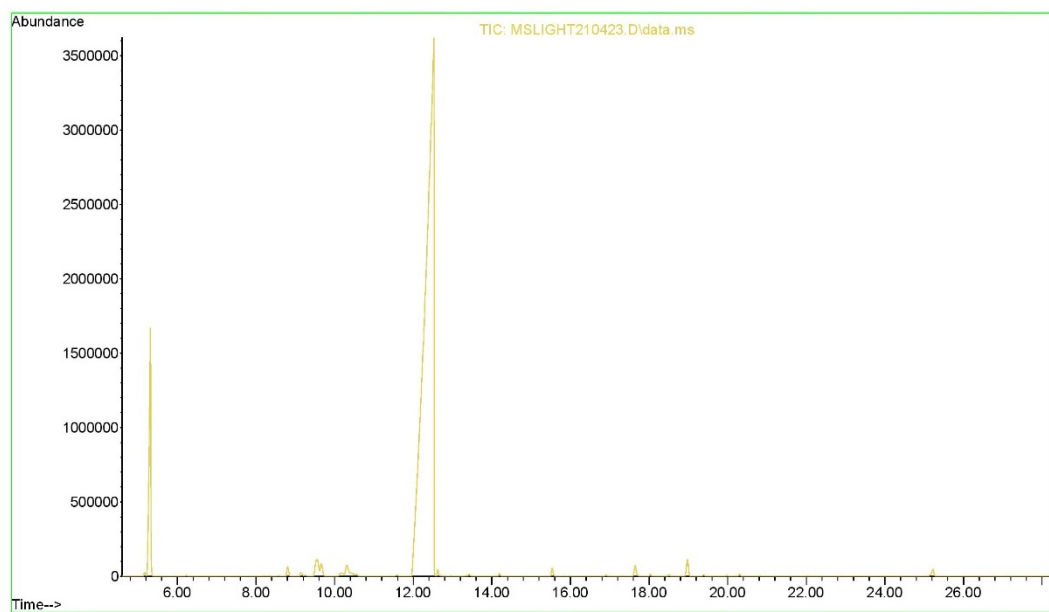

Figure 191 GC-MS chromatogram of *M. spicata* after 160 days of storage

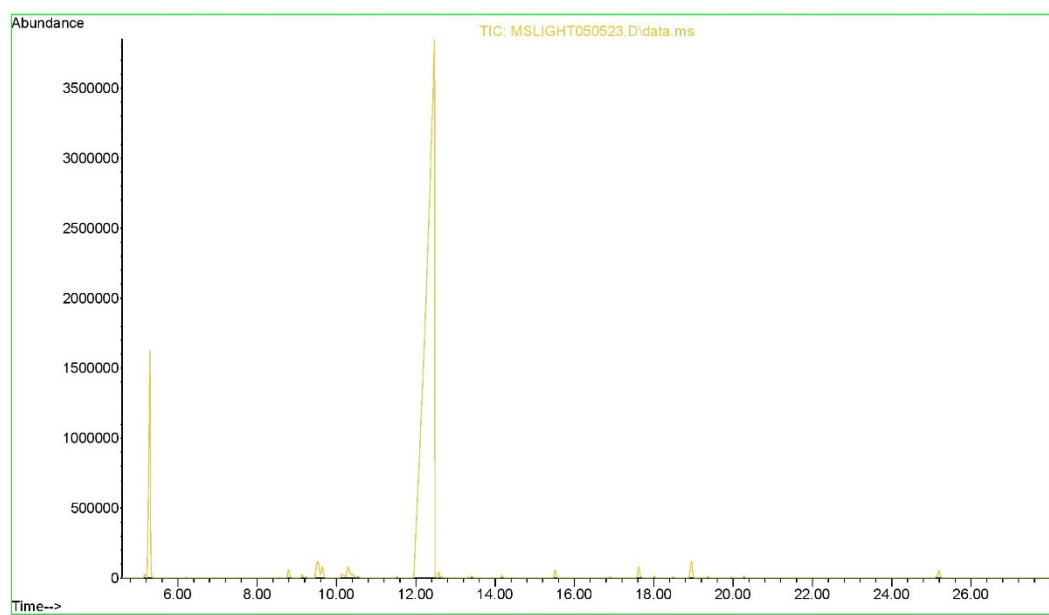

Figure 192 GC-MS chromatogram of *M. spicata* after 170 days of storage

#### 5.4. GC-MS chromatograms of the *M. spicata* essential oil during storage in sealed glass ampoules at 35 °C for 3 months

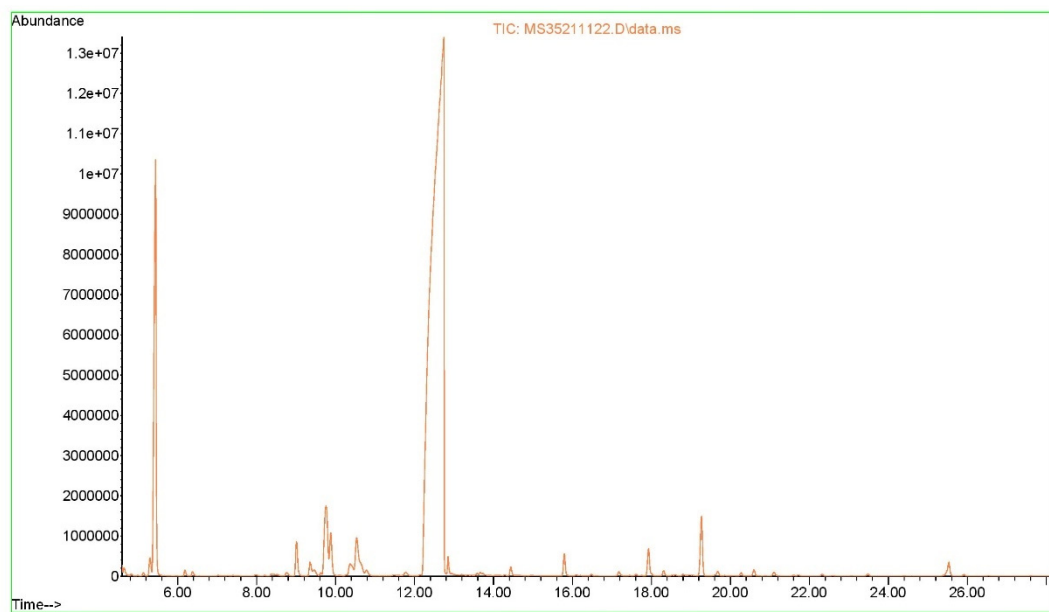

Figure 193 GC-MS chromatogram of *M. spicata* after 10 days of storage

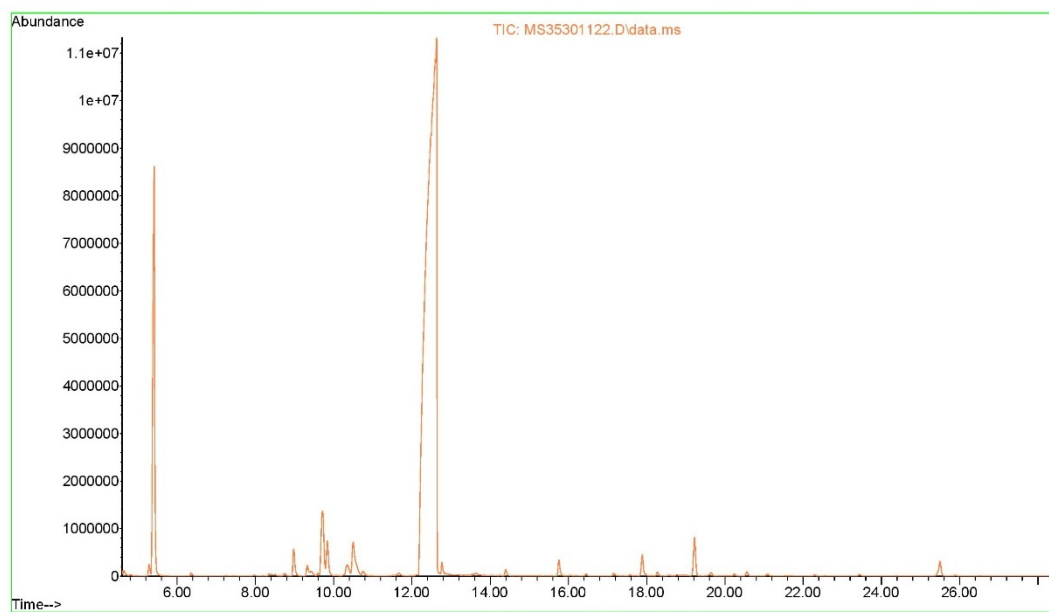

Figure 194 GC-MS chromatogram of *M. spicata* after 20 days of storage

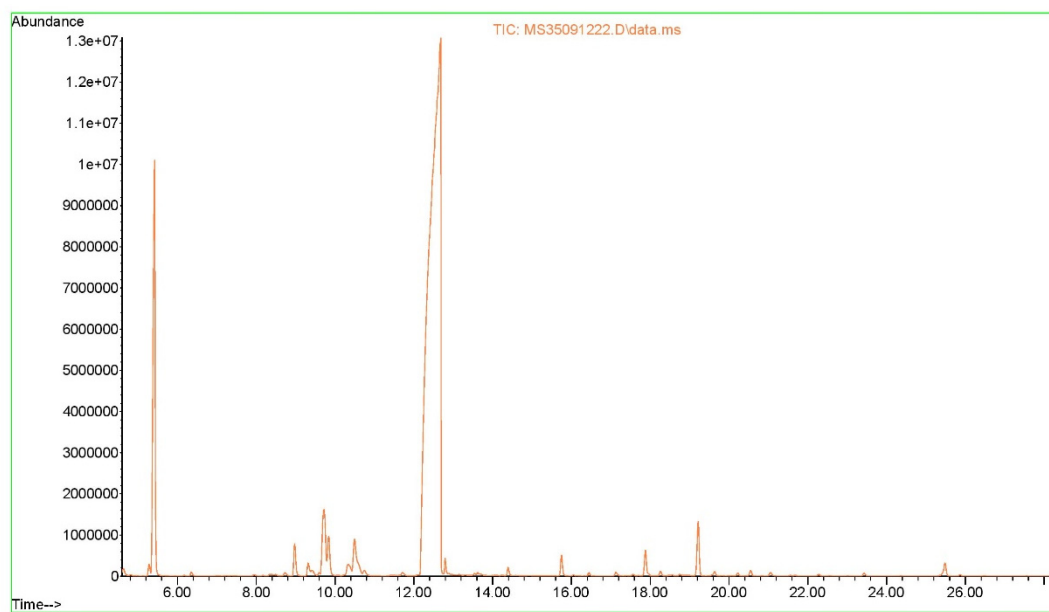

Figure 195 GC-MS chromatogram of *M. spicata* after 30 days of storage

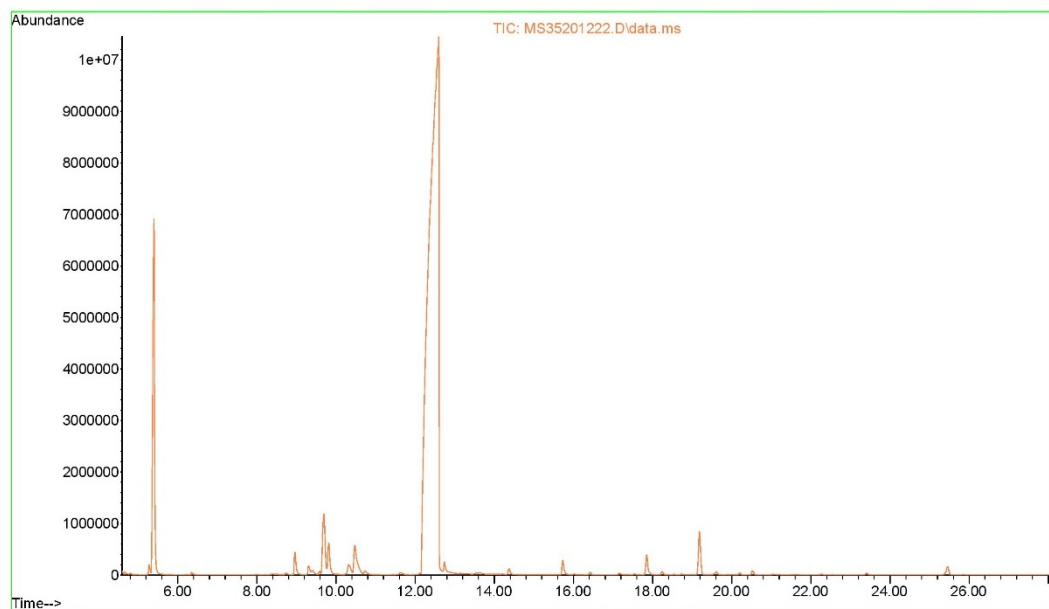

Figure 196 GC-MS chromatogram of *M. spicata* after 40 days of storage

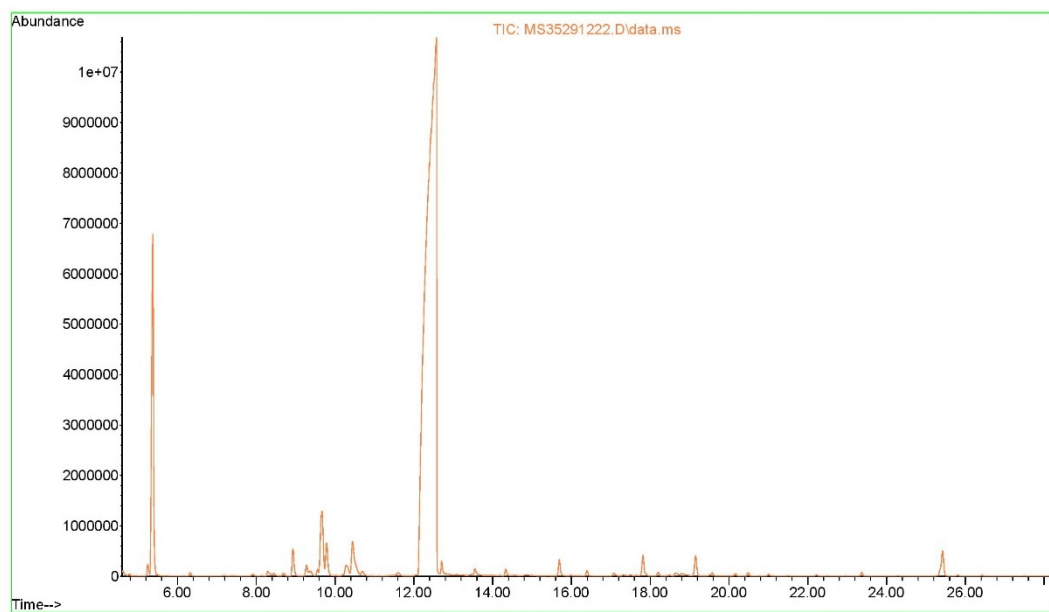

Figure 197 GC-MS chromatogram of *M. spicata* after 50 days of storage

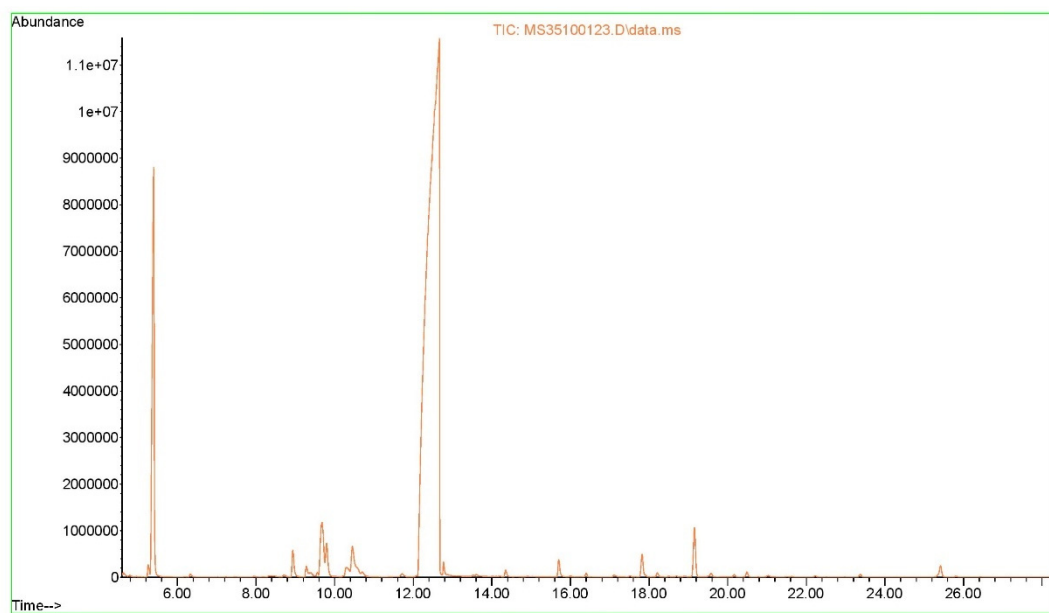

Figure 198 GC-MS chromatogram of *M. spicata* after 60 days of storage

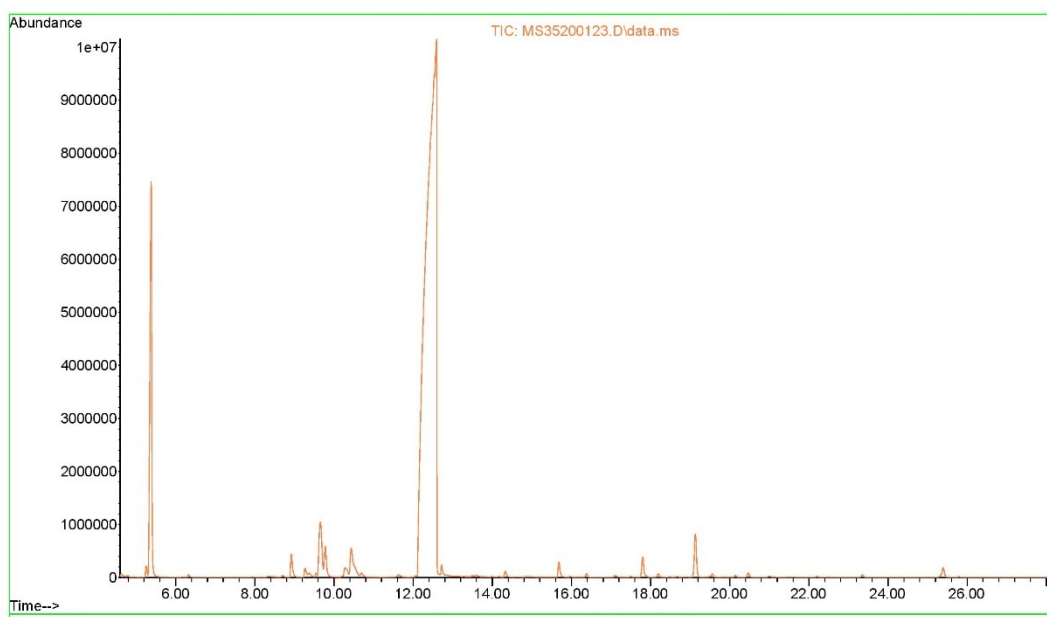

Figure 199 GC-MS chromatogram of *M. spicata* after 70 days of storage

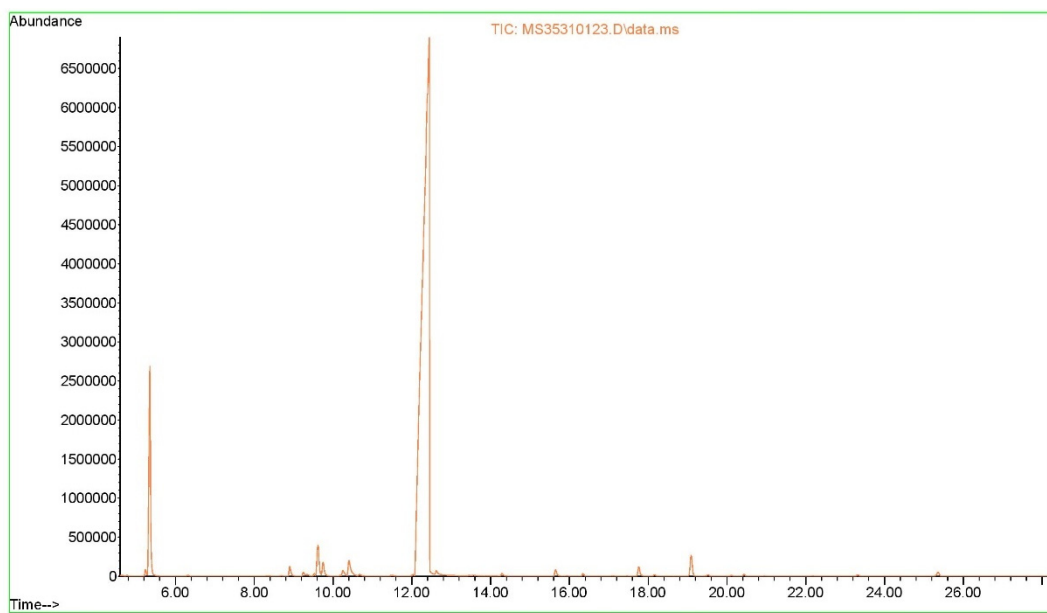

Figure 200 GC-MS chromatogram of *M. spicata* after 80 days of storage

### 5.5. GC-MS chromatograms of the *M. spicata* essential oil during storage in sealed glass ampoules at 45 °C for 3 months

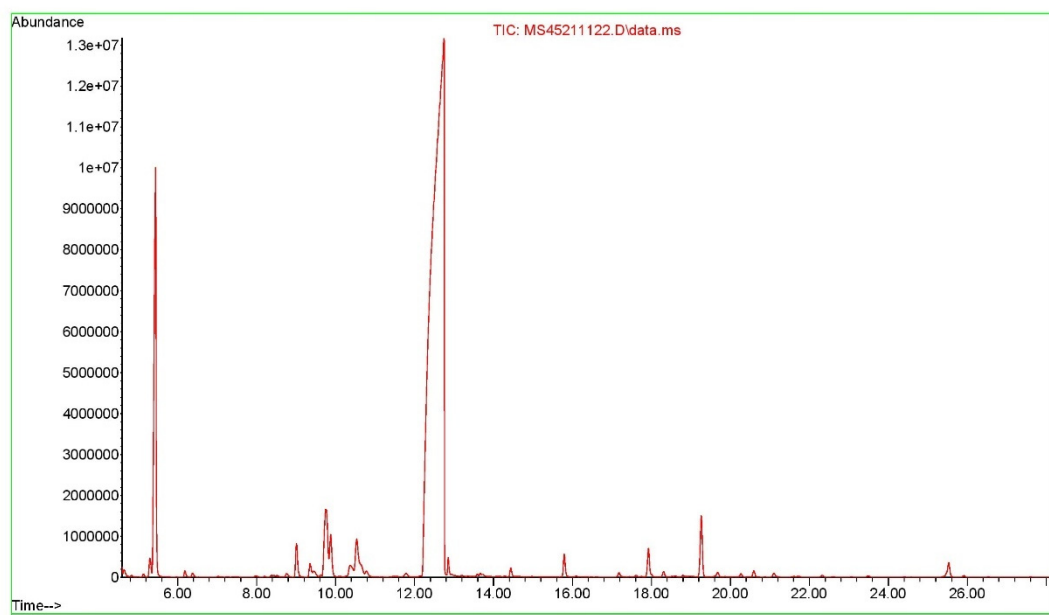

Figure 201 GC-MS chromatogram of *M. spicata* after 10 days of storage

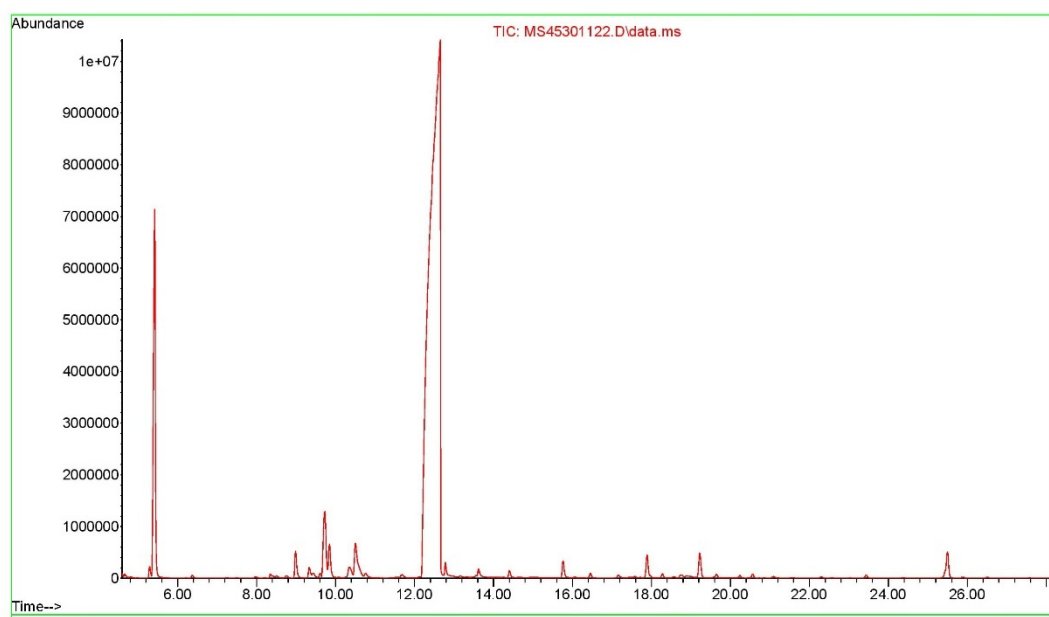

Figure 202 GC-MS chromatogram of *M. spicata* after 20 days of storage

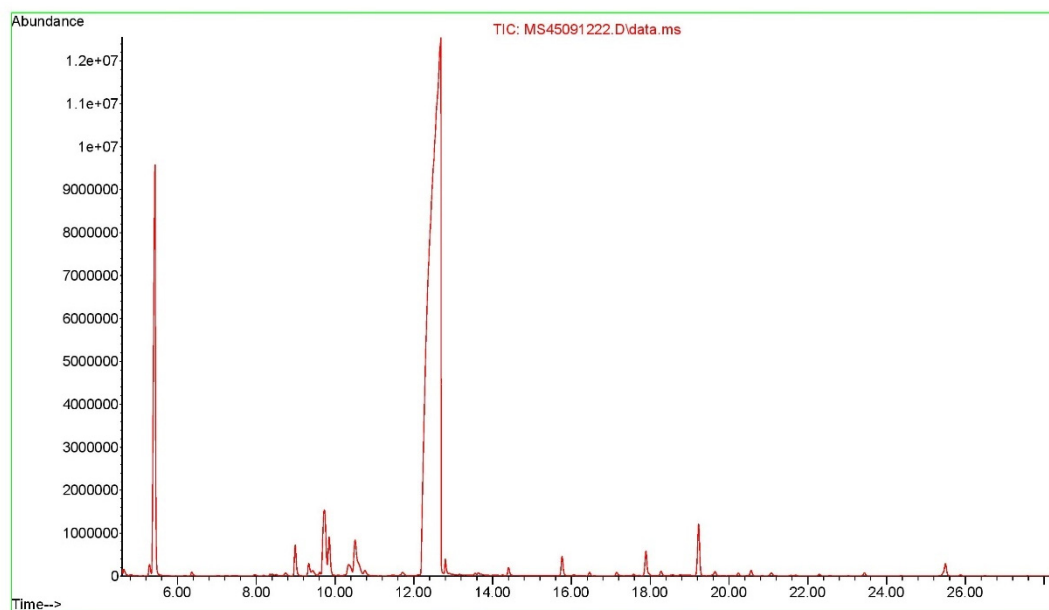

Figure 203 GC-MS chromatogram of *M. spicata* after 30 days of storage

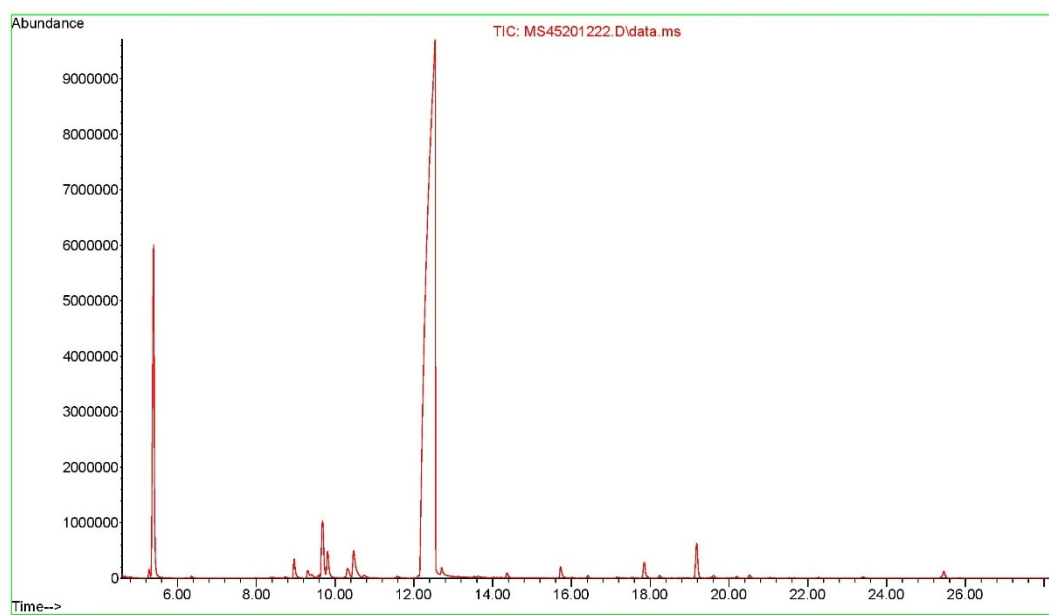

Figure 204 GC-MS chromatogram of *M. spicata* after 40 days of storage

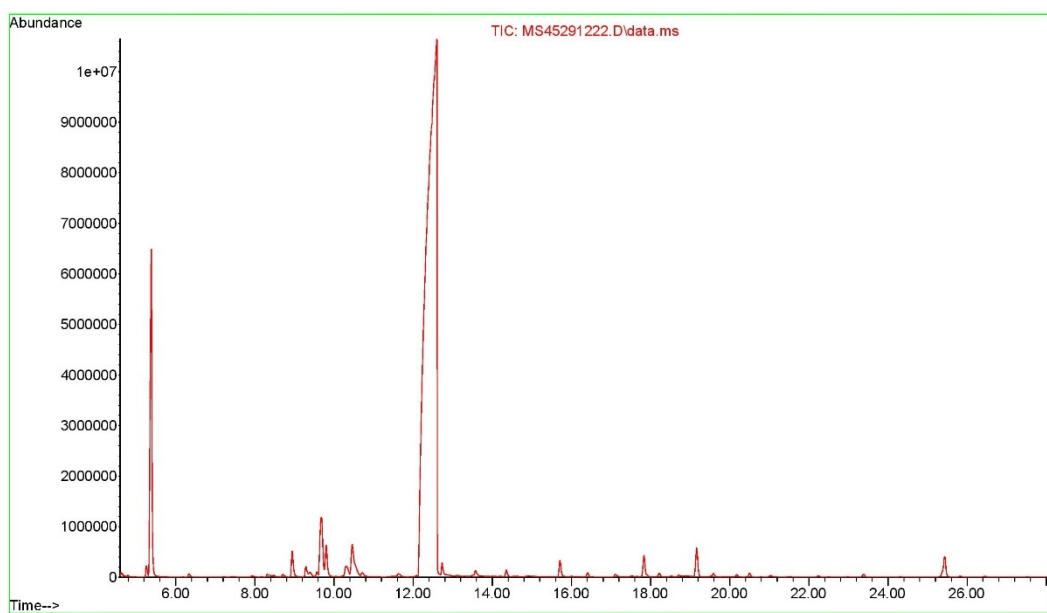

Figure 205 GC-MS chromatogram of *M. spicata* after 50 days of storage

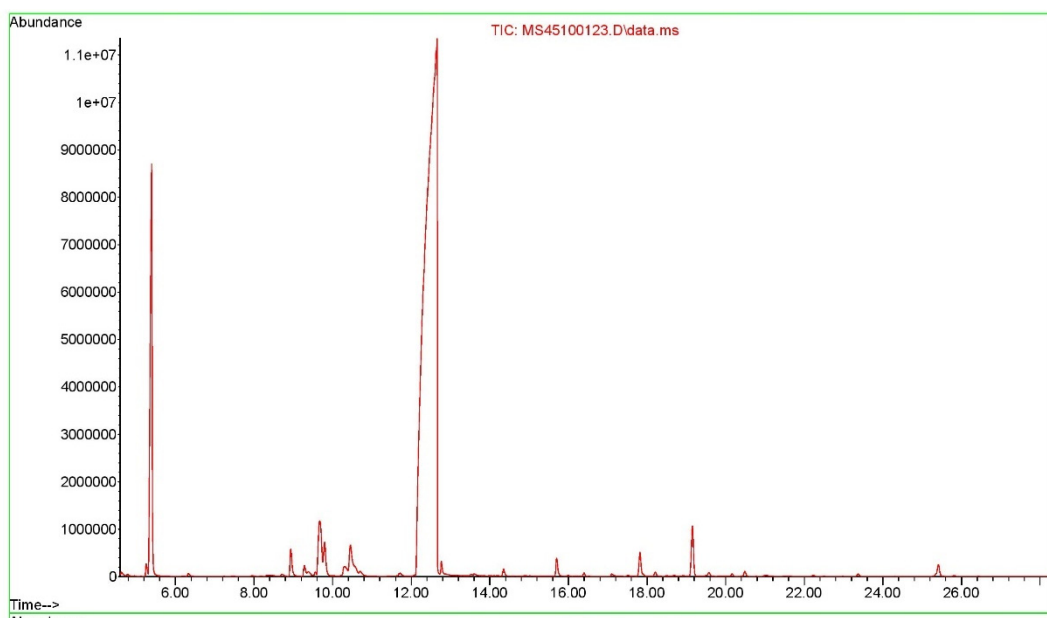

Figure 206 GC-MS chromatogram of *M. spicata* after 60 days of storage

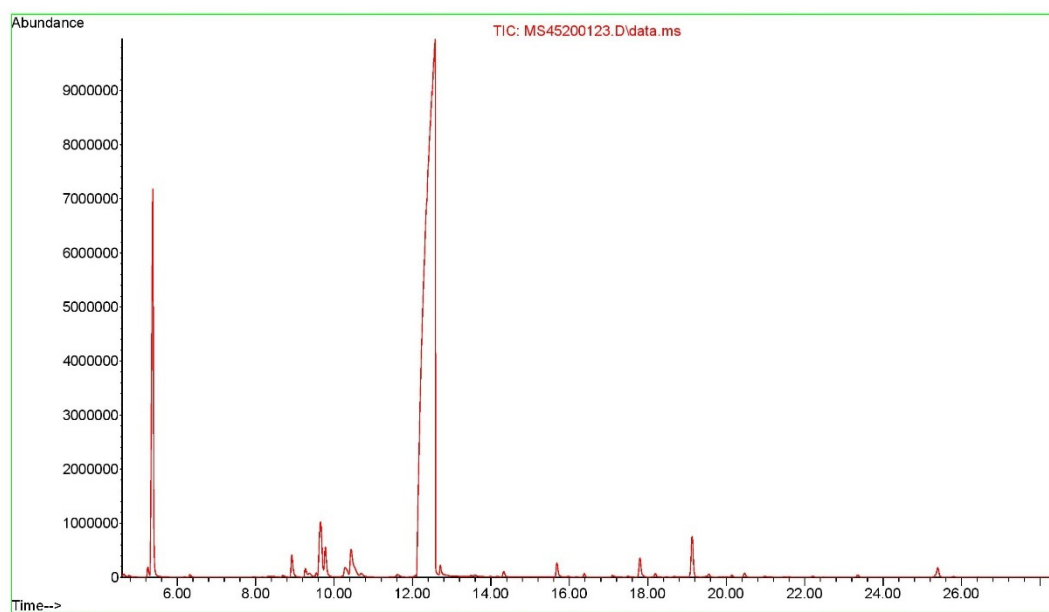

Figure 207 GC-MS chromatogram of *M. spicata* after 70 days of storage

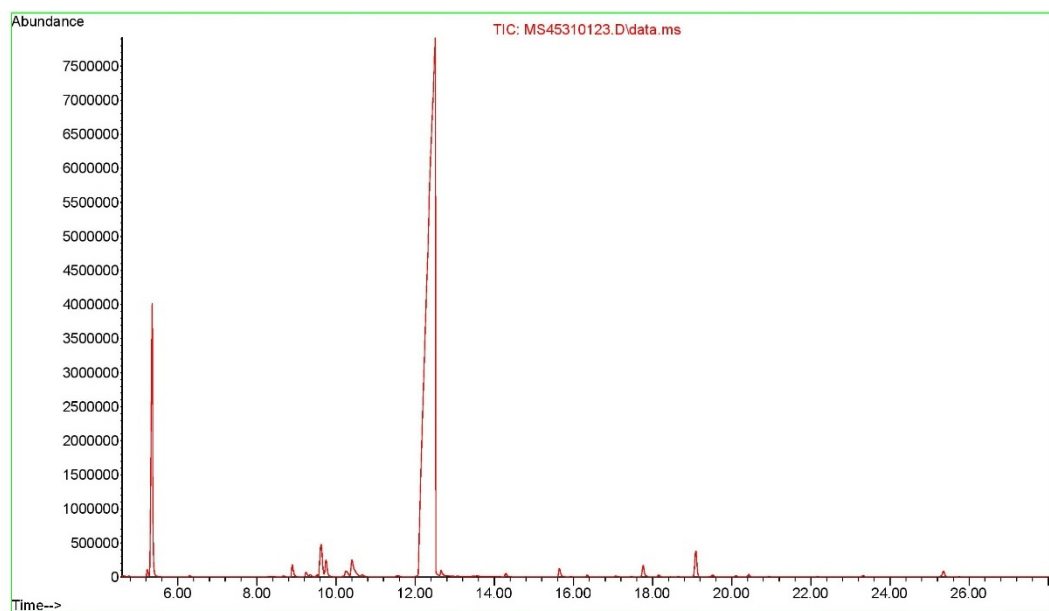

Figure 208 GC-MS chromatogram of *M. spicata* after 80 days of storage

## 5.6. GC-MS chromatograms of the *M. spicata* essential oil during storage in glass tubes sealed with cap at 35 °C for 3 months

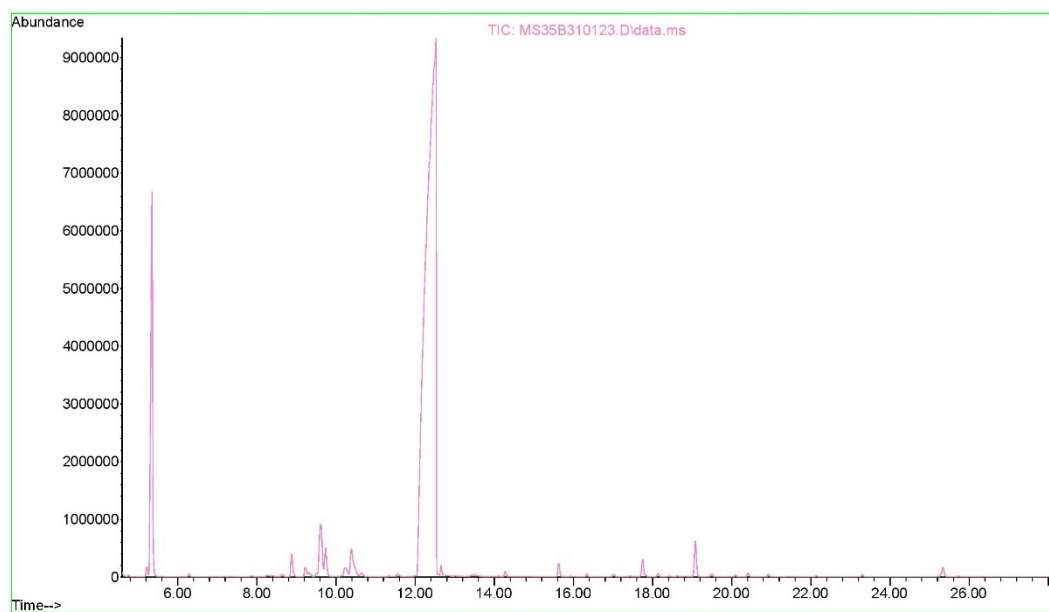

Figure 209 GC-MS chromatogram of *M. spicata* after 10 days of storage

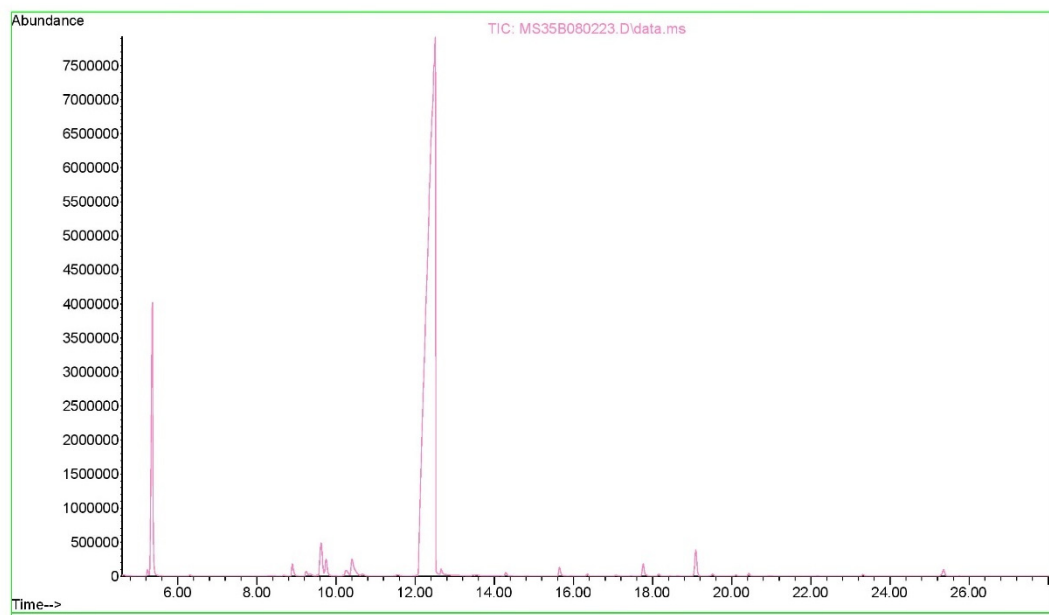

Figure 210 GC-MS chromatogram of *M. spicata* after 20 days of storage

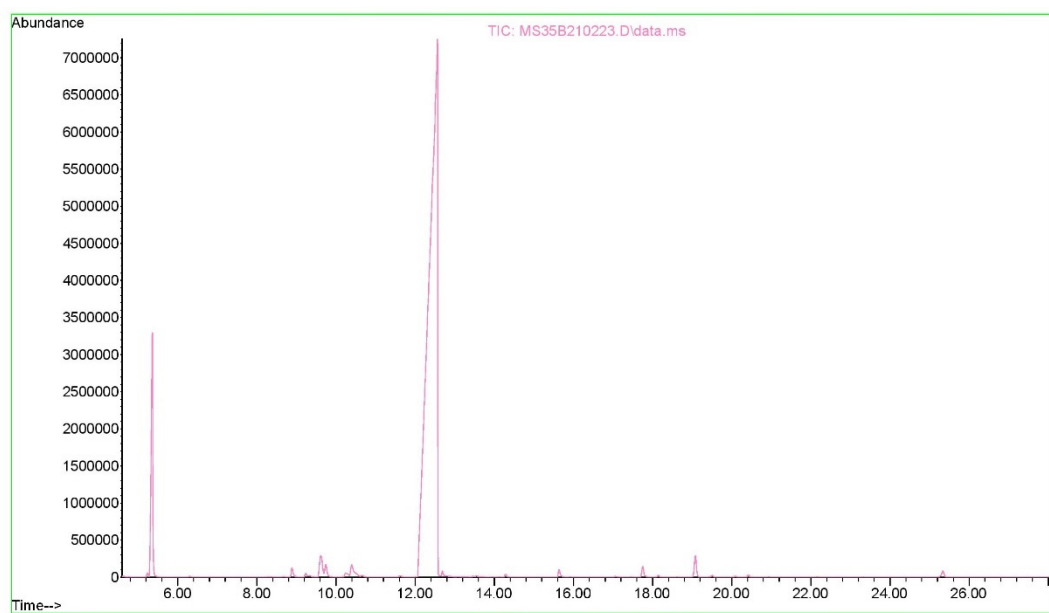

Figure 211 GC-MS chromatogram of *M. spicata* after 30 days of storage

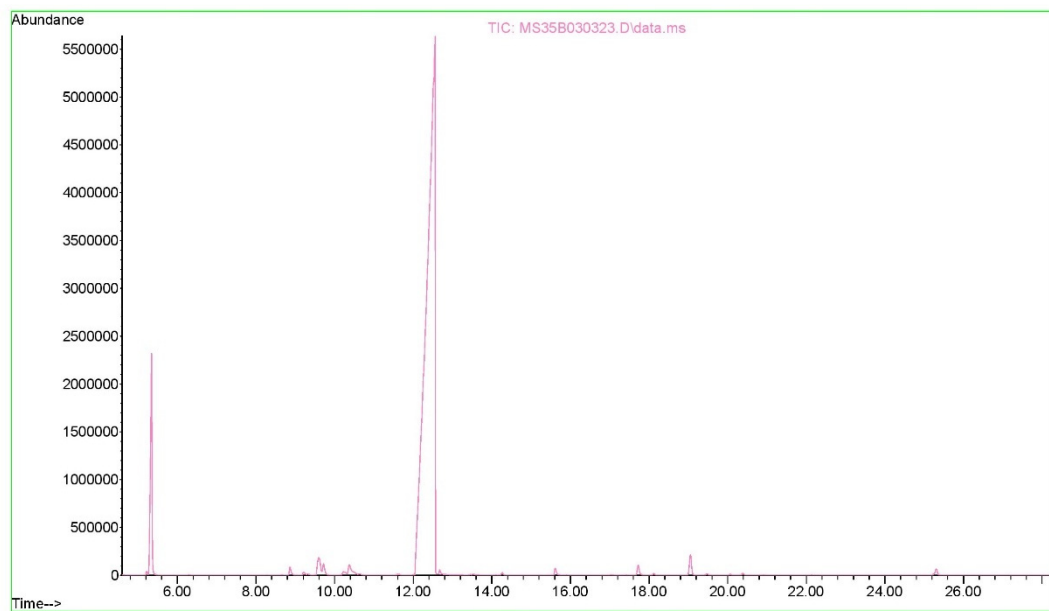

Figure 212 GC-MS chromatogram of *M. spicata* after 40 days of storage

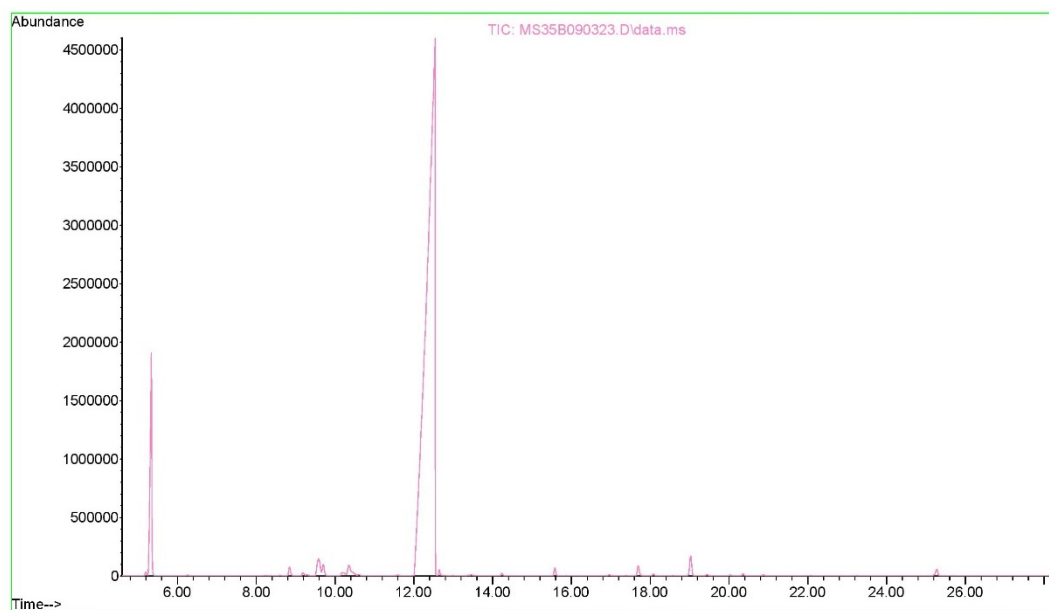

Figure 213 GC-MS chromatogram of *M. spicata* after 50 days of storage

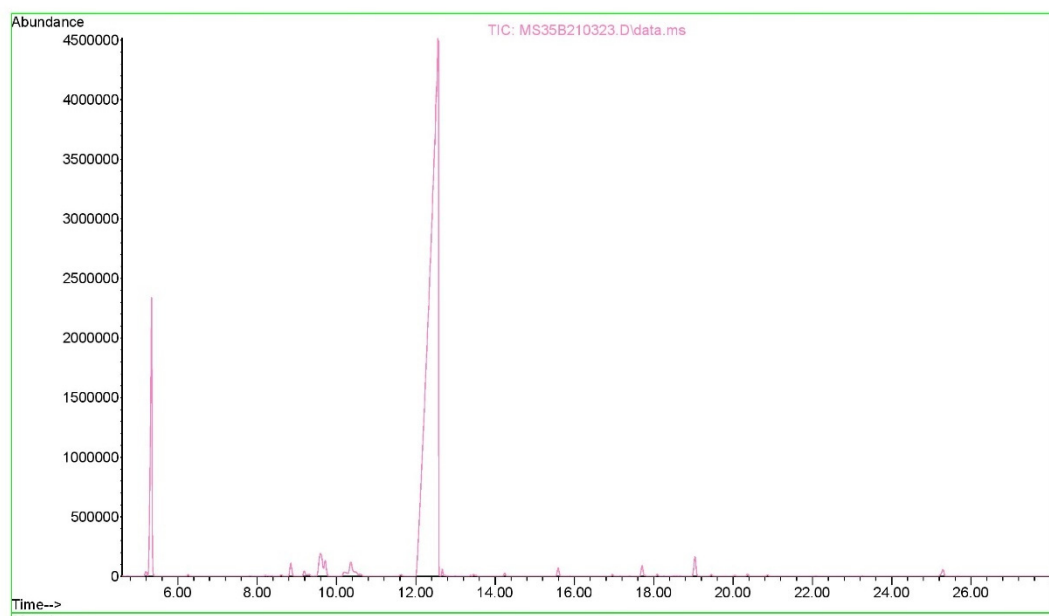

Figure 214 GC-MS chromatogram of *M. spicata* after 60 days of storage

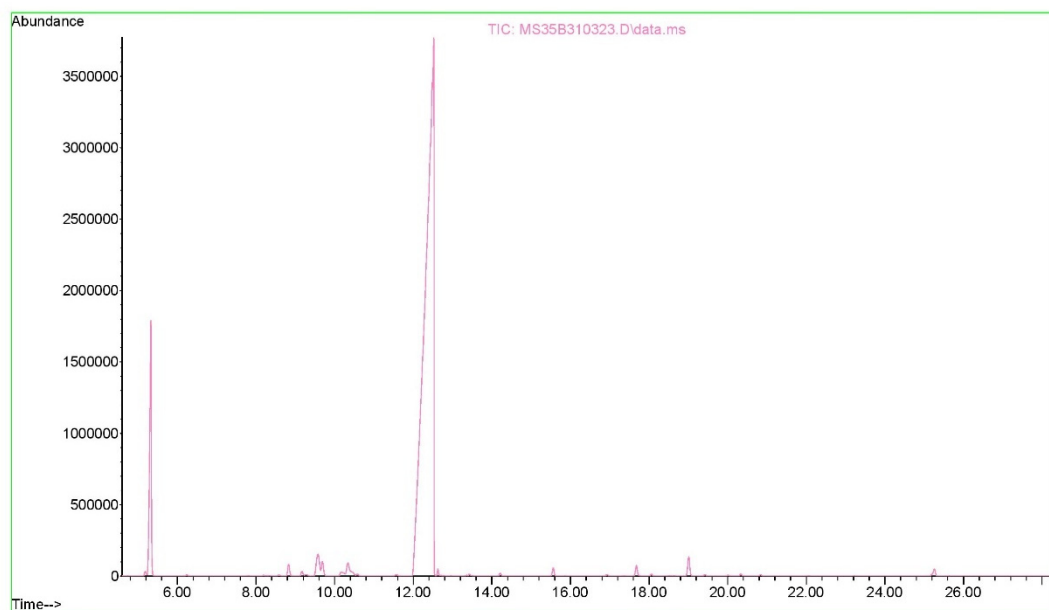

Figure 215 GC-MS chromatogram of *M. spicata* after 70 days of storage

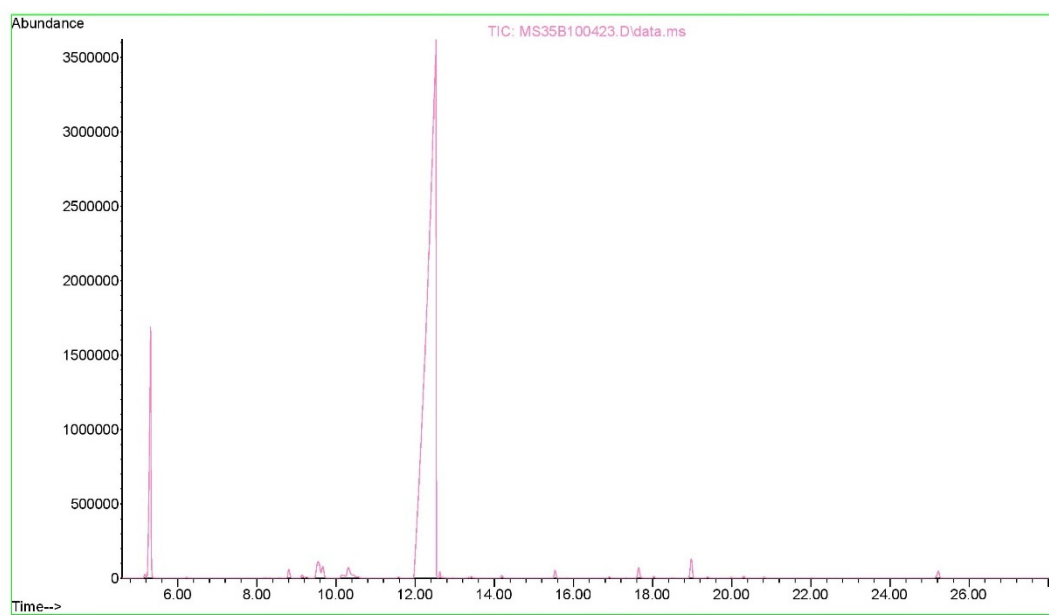

Figure 216 GC-MS chromatogram of *M. spicata* after 80 days of storage

### 5.7. GC-MS chromatograms of the *M. spicata* essential oil during storage in glass tubes sealed with cap at 45 °C for 3 months

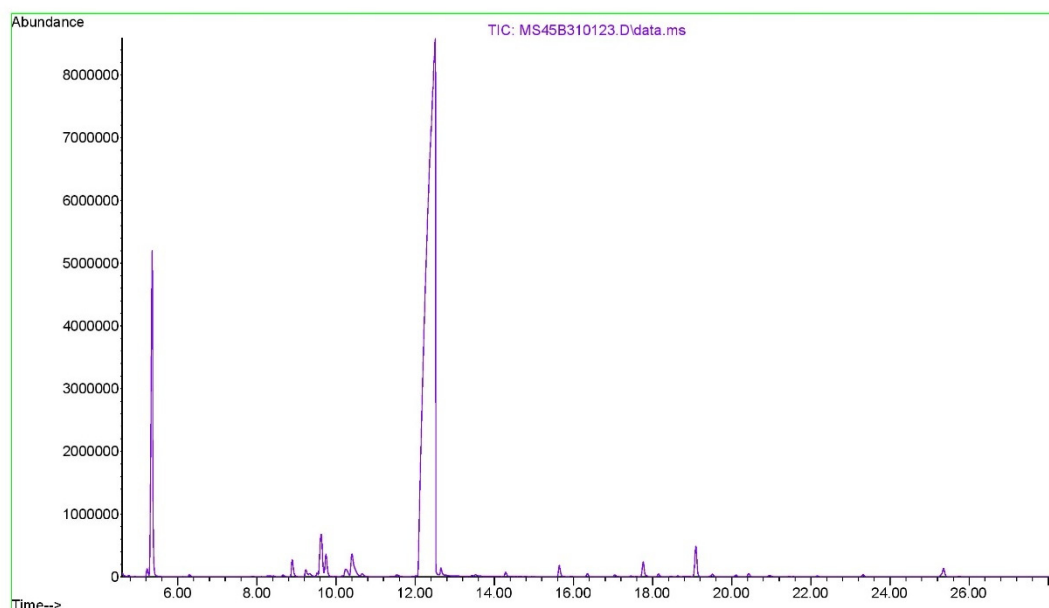

Figure 217 GC-MS chromatogram of *M. spicata* after 10 days of storage

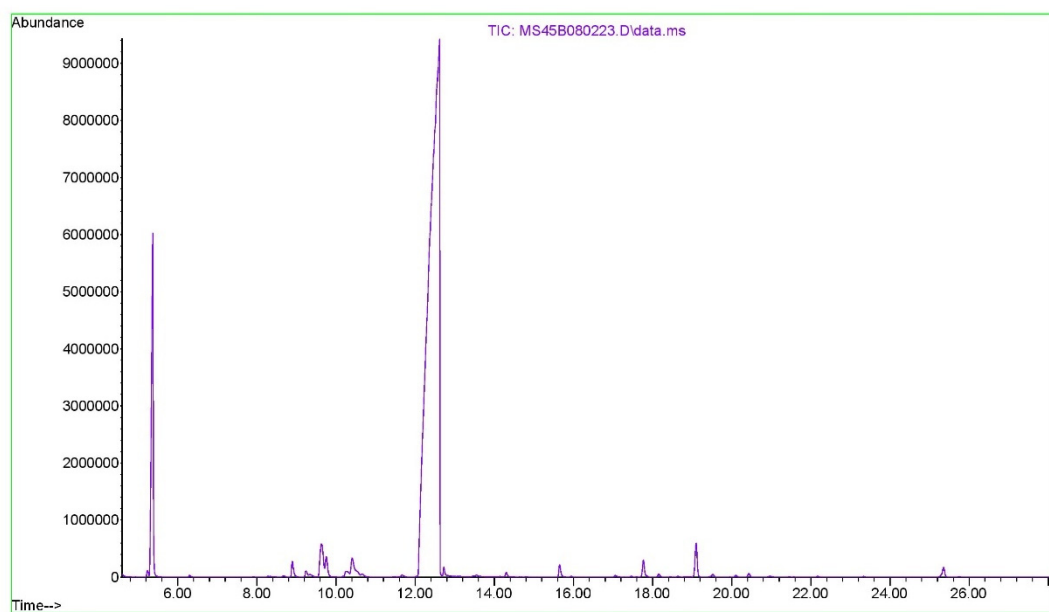

Figure 218 GC-MS chromatogram of *M. spicata* after 20 days of storage

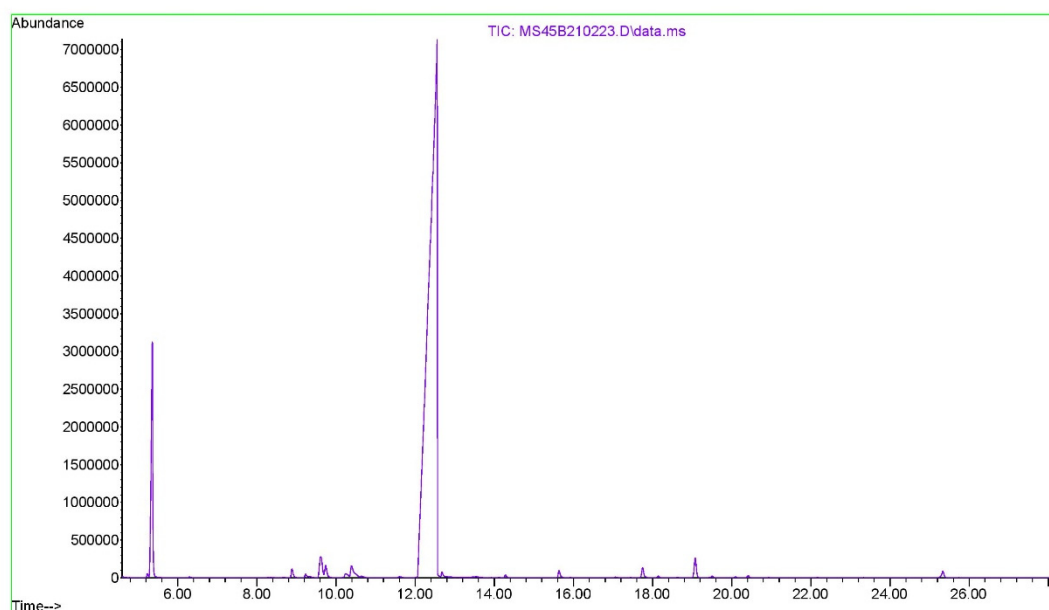

Figure 219 GC-MS chromatogram of *M. spicata* after 30 days of storage

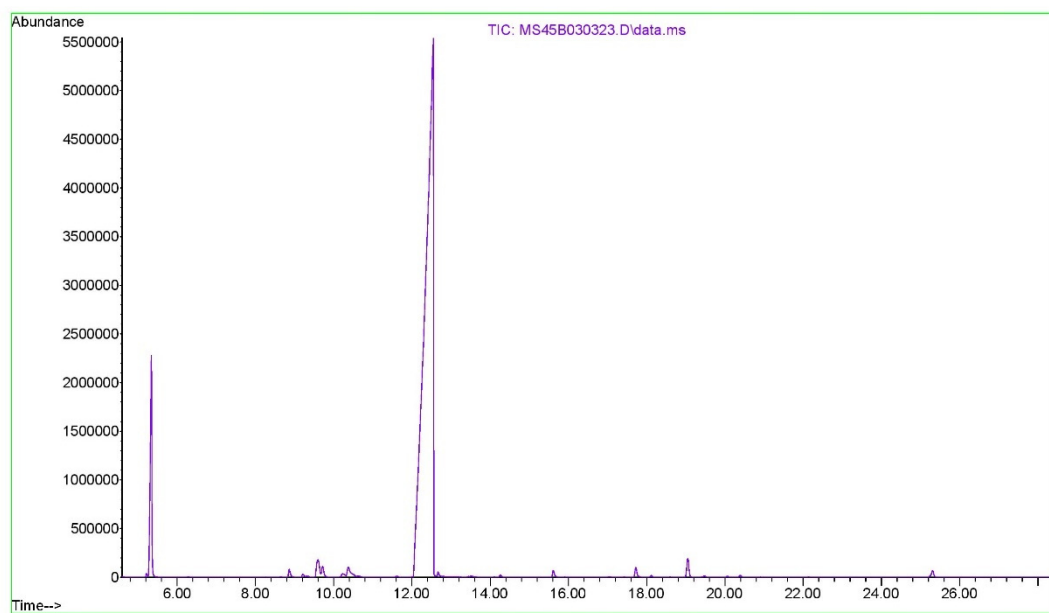

Figure 220 GC-MS chromatogram of *M. spicata* after 40 days of storage

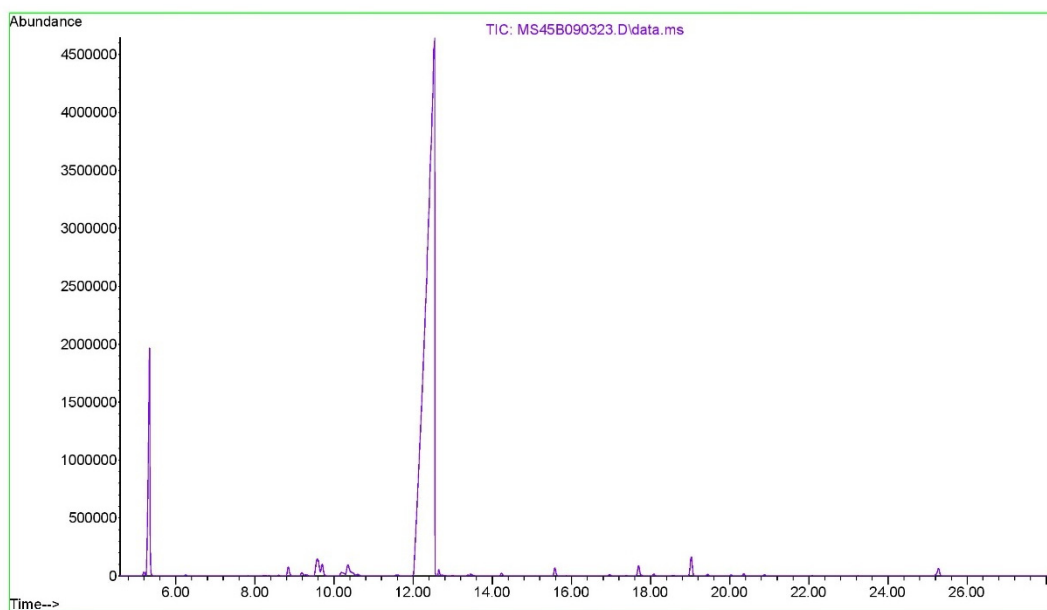

Figure 221 GC-MS chromatogram of *M. spicata* after 50 days of storage

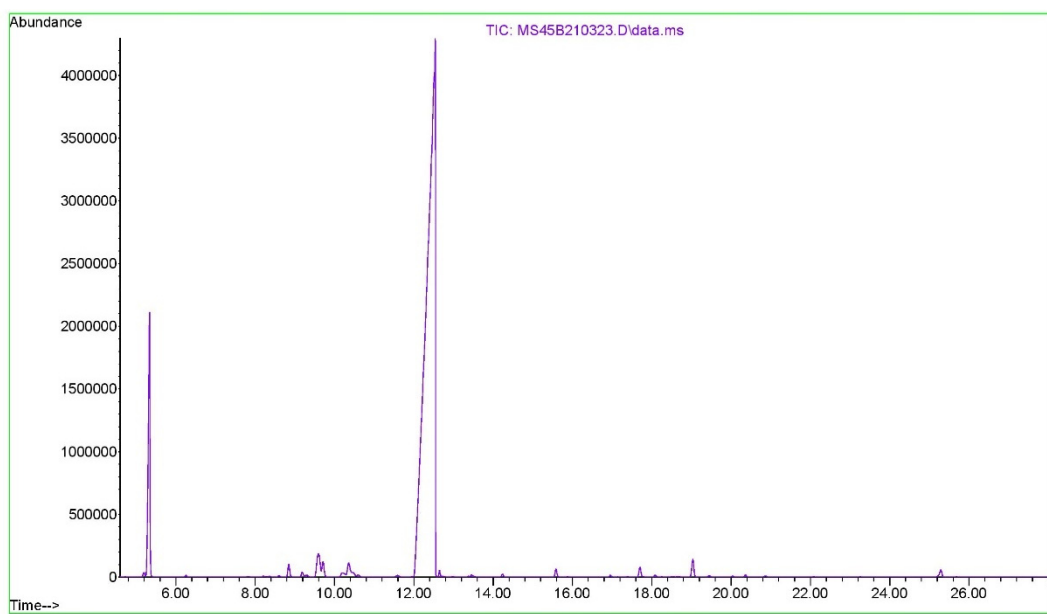

Figure 222 GC-MS chromatogram of *M. spicata* after 60 days of storage

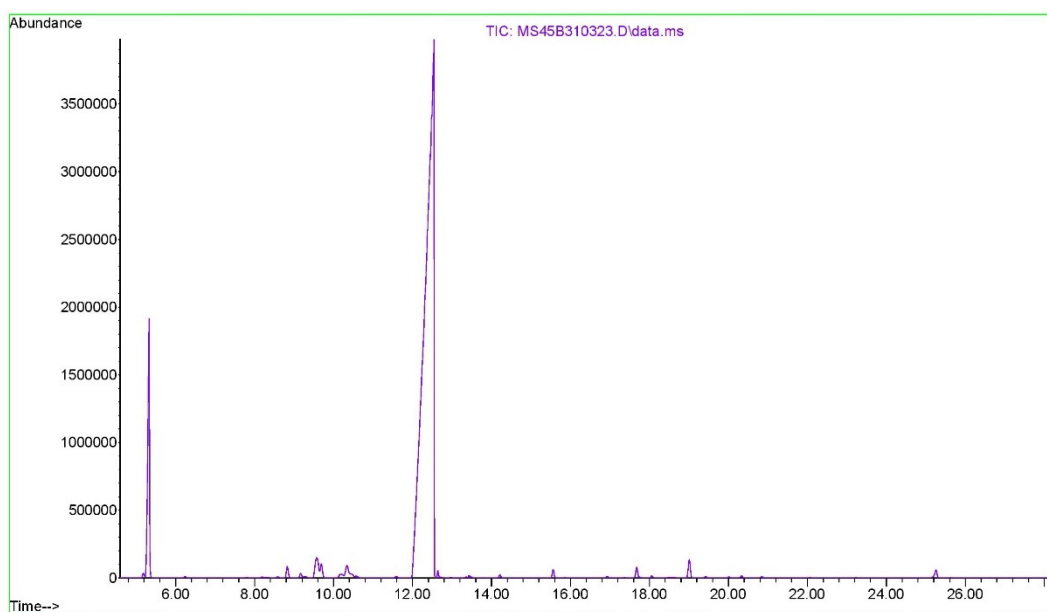

Figure 223 GC-MS chromatogram of *M. spicata* after 70 days of storage

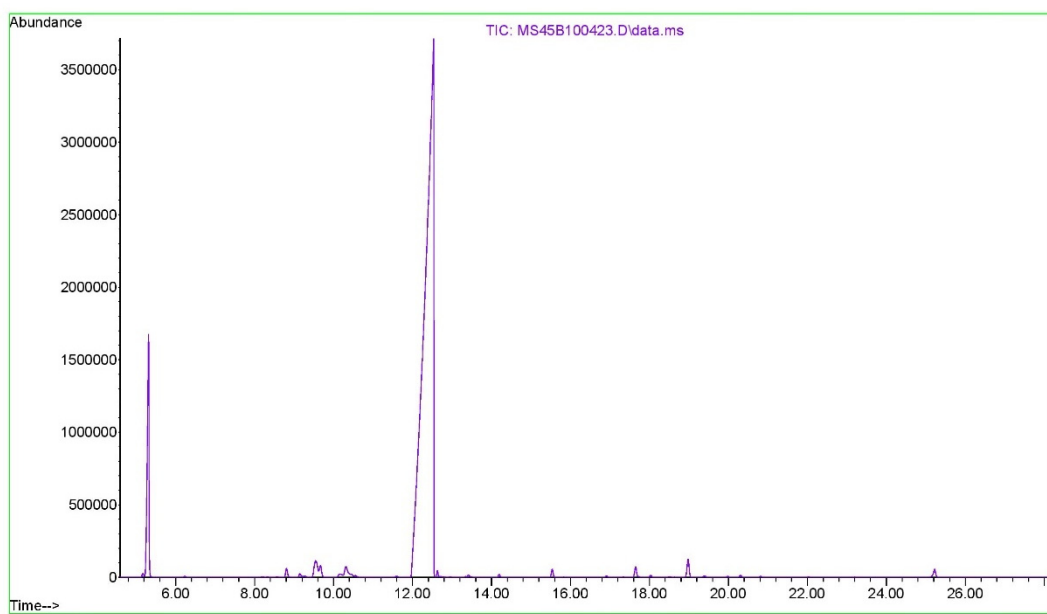

Figure 224 GC-MS chromatogram of *M. spicata* after 80 days of storage

### 5.8. GC-MS chromatograms of the *M. spicata* essential oil during storage in glass tubes sealed with cap at 4 °C for 6 months

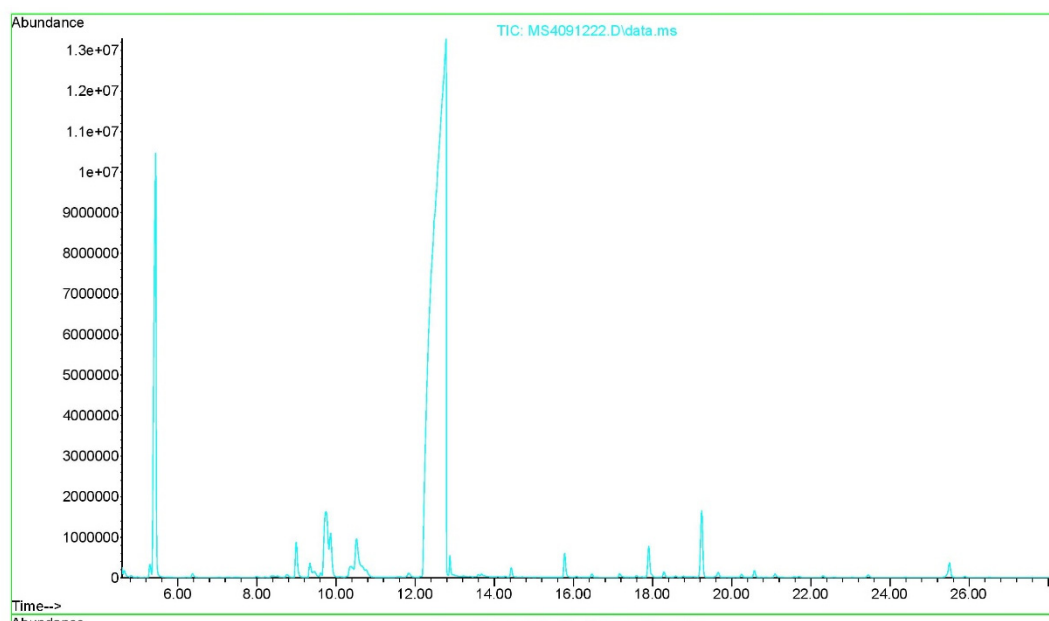

Figure 225 GC-MS chromatogram of *M. spicata* after 30 days of storage

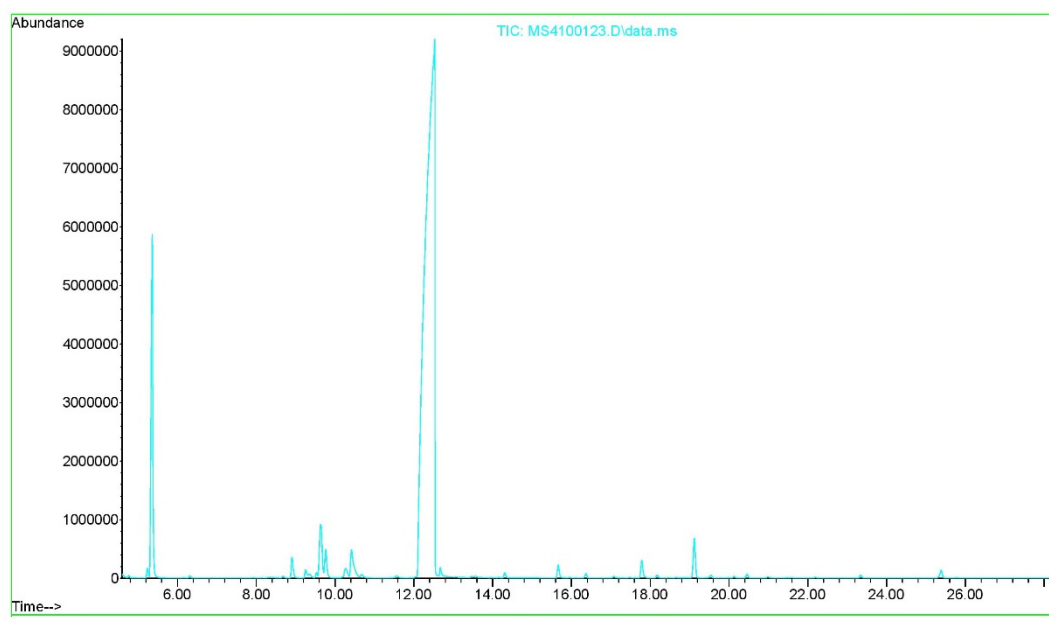

Figure 226 GC-MS chromatogram of *M. spicata* after 60 days of storage

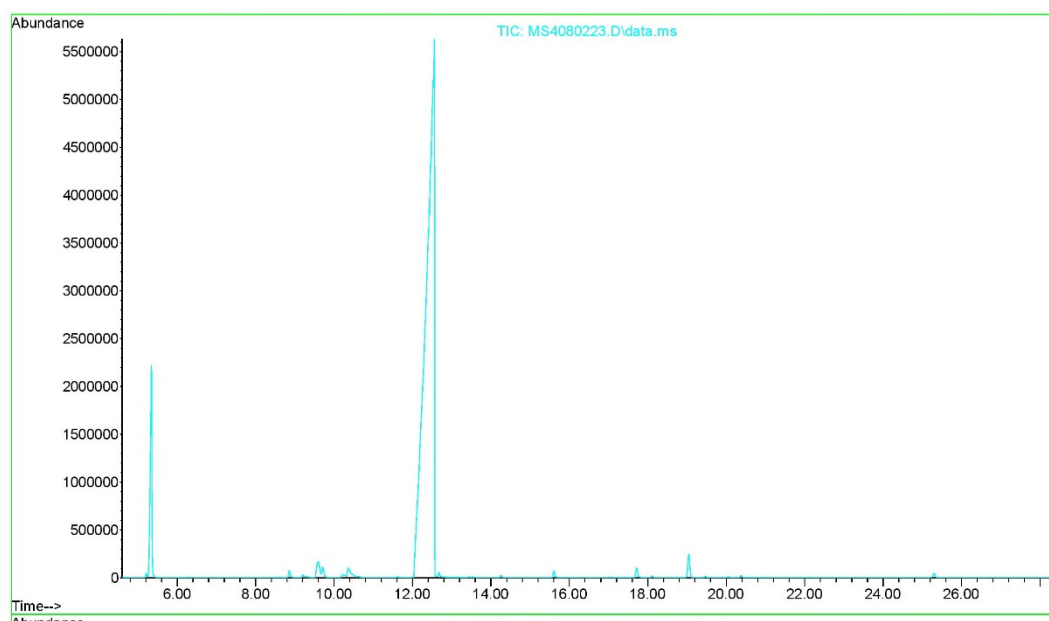

Figure 227 GC-MS chromatogram of *M. spicata* after 90 days of storage

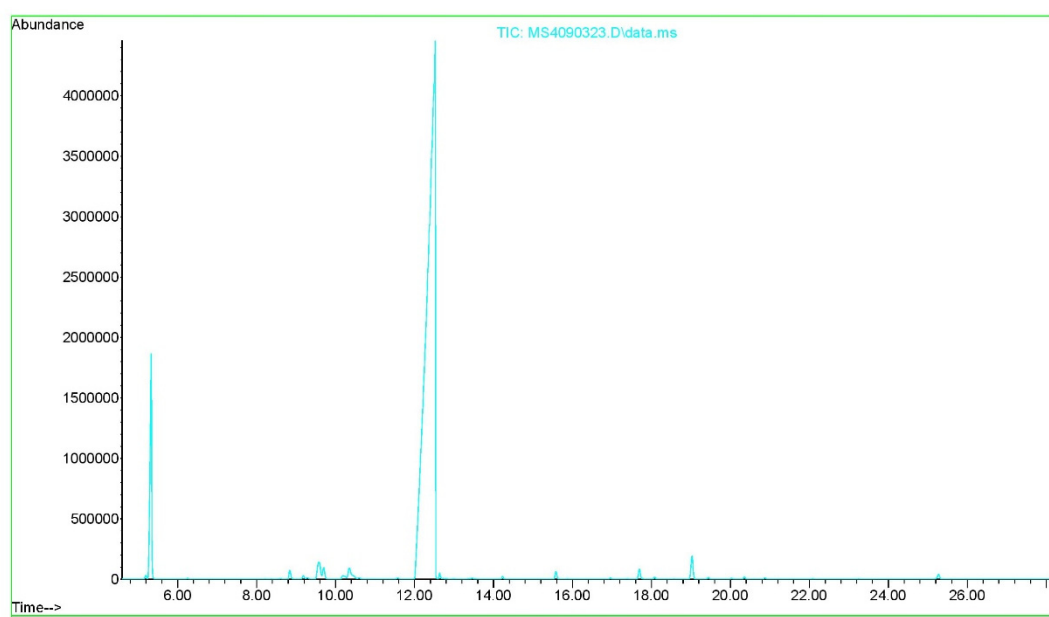

Figure 228 GC-MS chromatogram of *M. spicata* after 120 days of storage

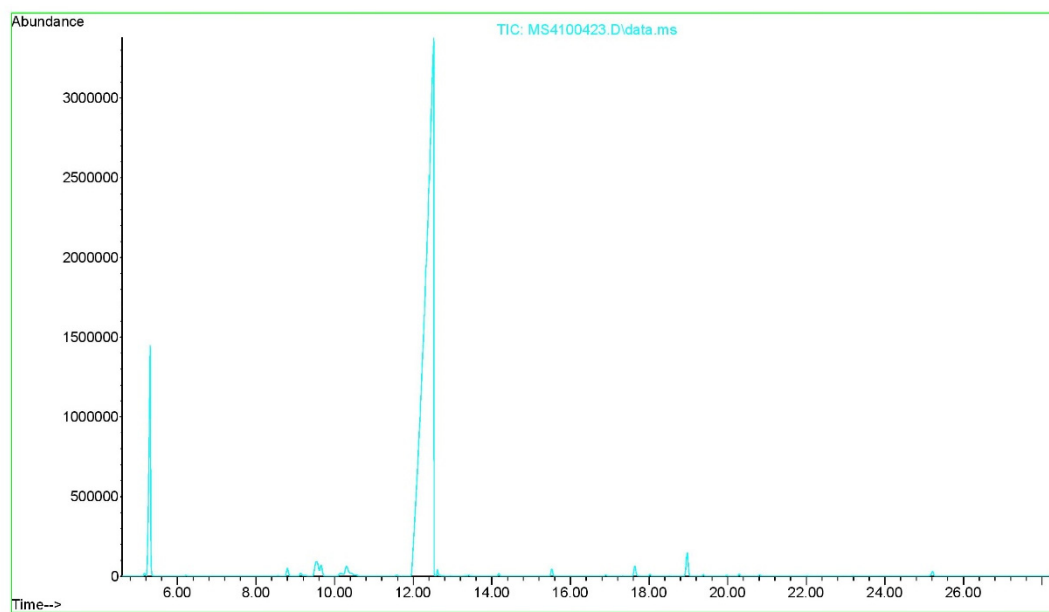

Figure 229 GC-MS chromatogram of *M. spicata* after 150 days of storage

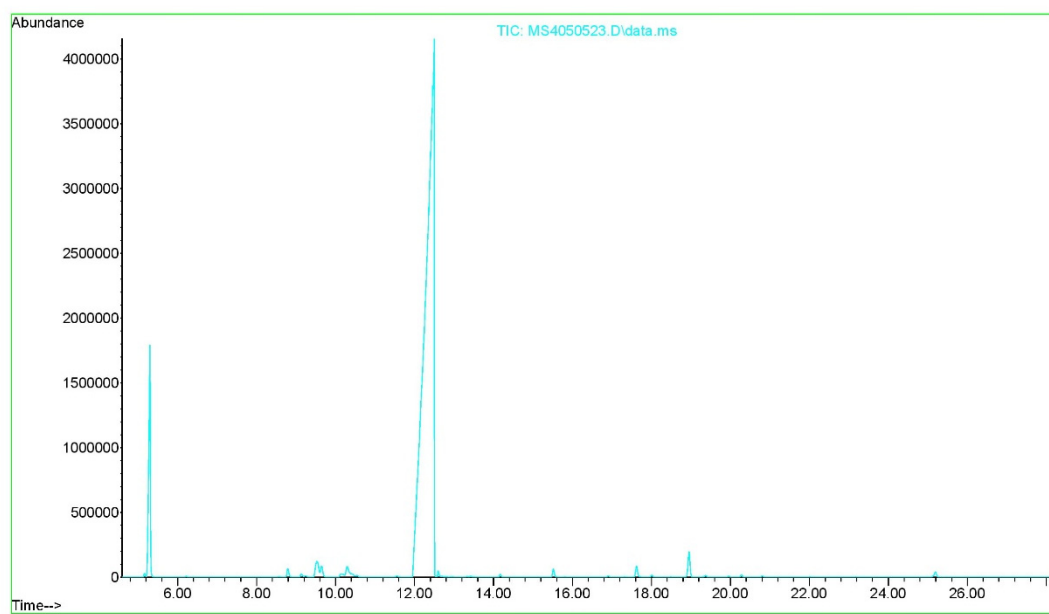

Figure 230 GC-MS chromatogram of *M. spicata* after 180 days of storage

### 5.9. GC-MS chromatogram of the *M. spicata* essential oil during storage in metal container at 4 °C for 6 months

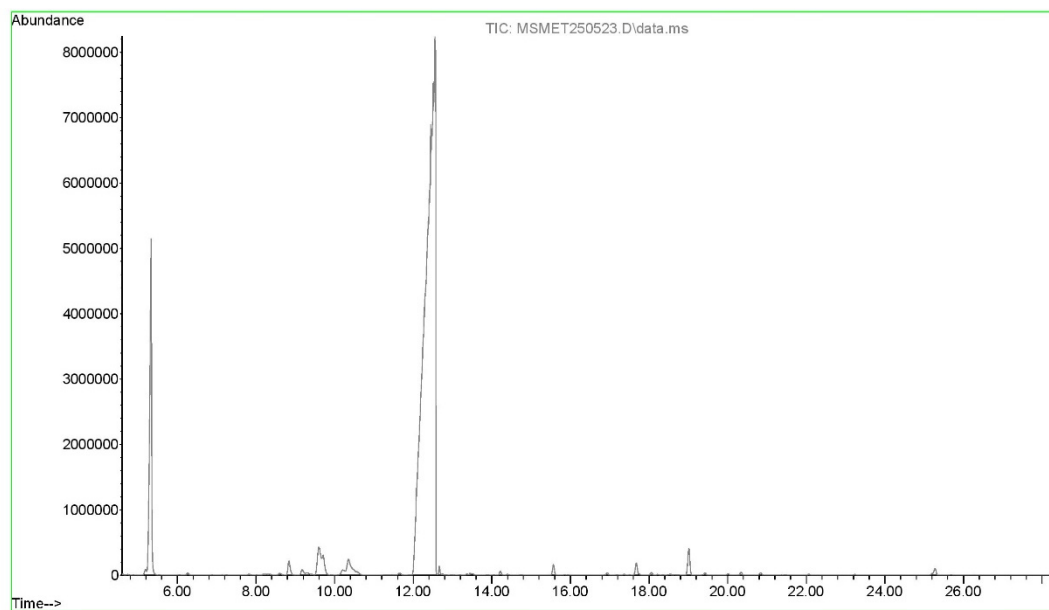

Figure 231 GC-MS chromatogram of *M. spicata* after 180 days of storage

### 5.10. GC-MS chromatogram of the *M. spicata* essential oil during storage in sealed glass ampoules at 4 °C for 6 months

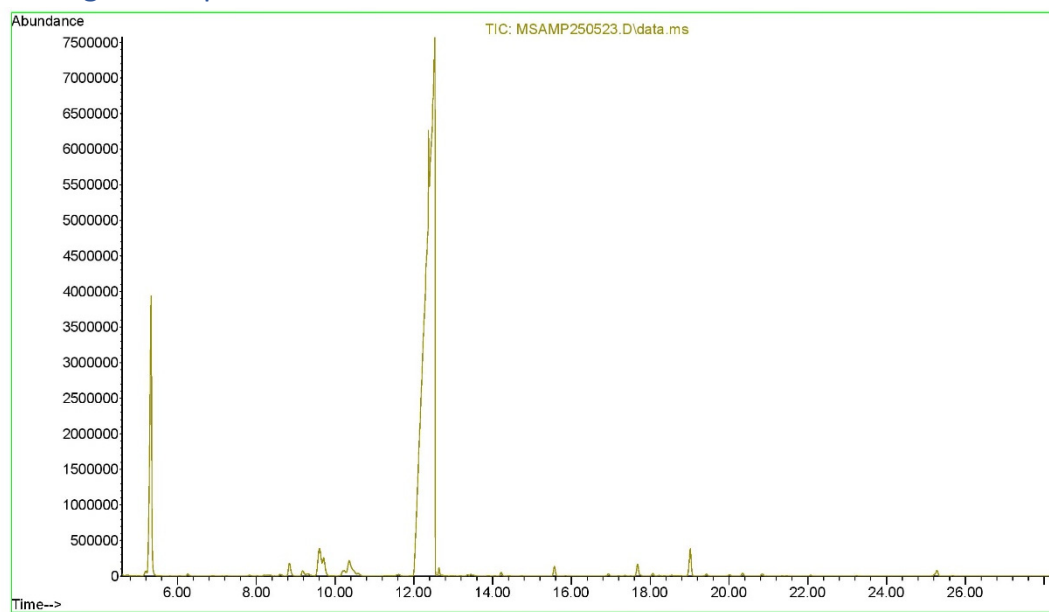

Figure 232 GC-MS chromatogram of *M. spicata* after 180 days of storage

### 5.11. GC-MS chromatogram of the *M. spicata* essential oil during storage in glass tubes sealed with cap at -20 °C for 6 months

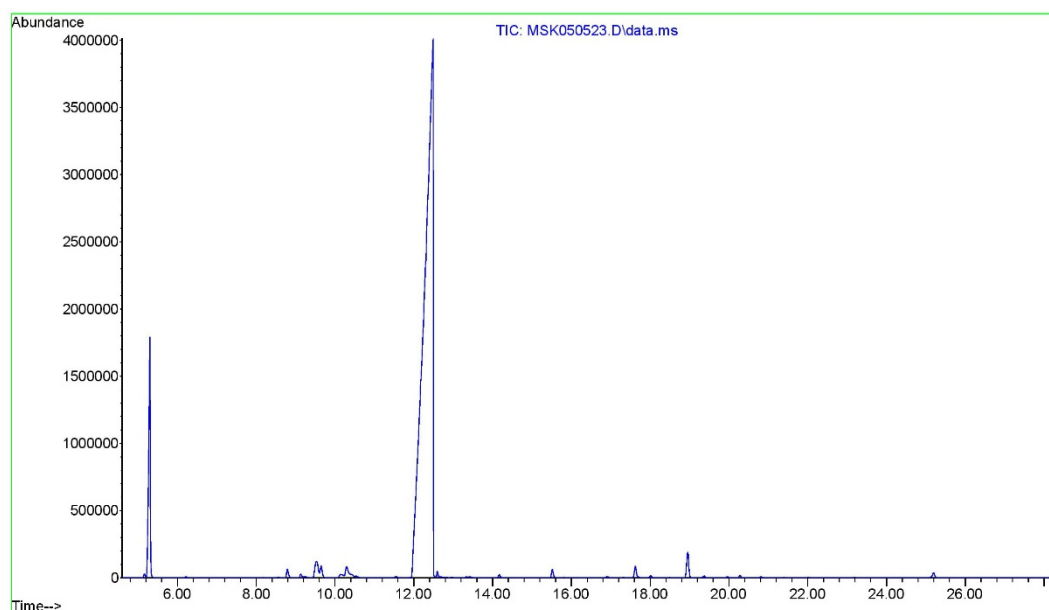

Figure 233 GC-MS chromatogram of *M. spicata* after 180 days of storage

## 6. GC-MS chromatograms of the *Mentha x piperita* L. essential oil

### 6.1. GC-MS chromatogram of the initial *M. x piperita* essential oil

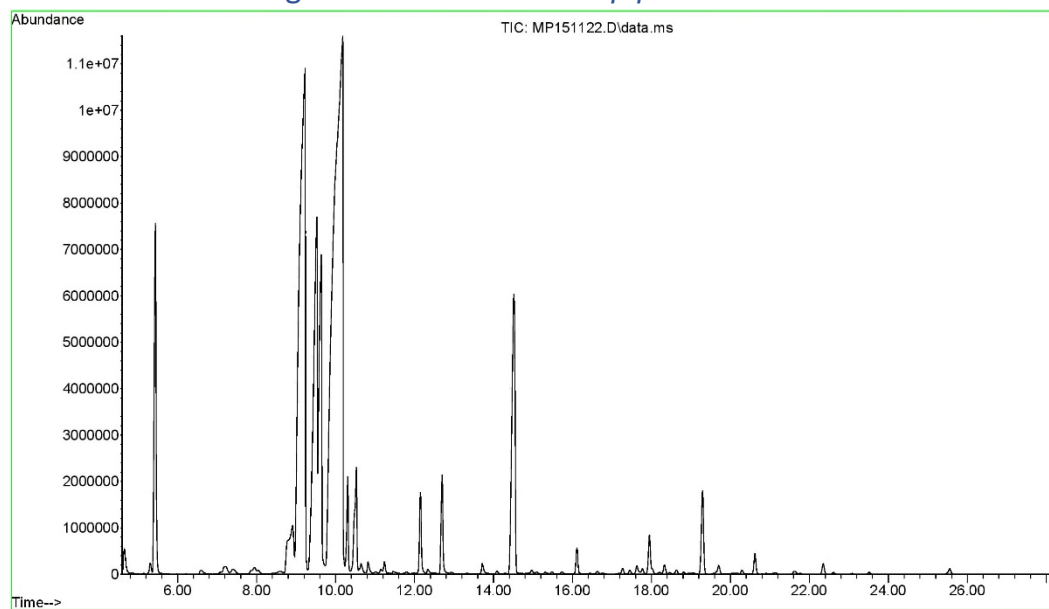

Figure 234 GC-MS chromatogram of *M. x piperita* before storage

6.2. GC-MS chromatograms of the *M. x piperita* essential oil during storage in glass tubes sealed with cap at room temperature (23 °C) under darkness for 6 months

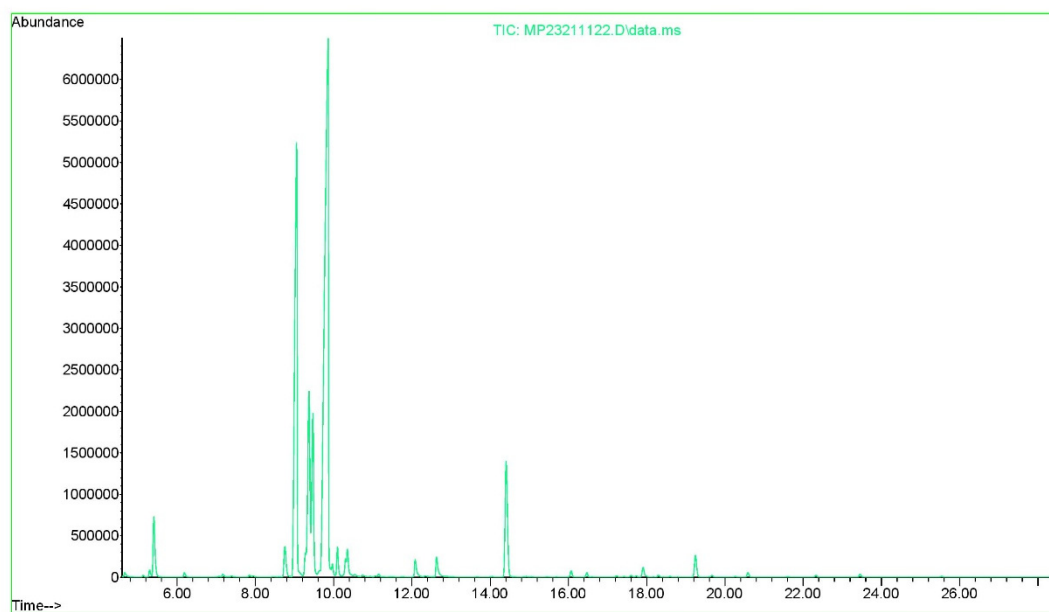

Figure 235 GC-MS chromatogram of *M. x piperita* after 10 days of storage

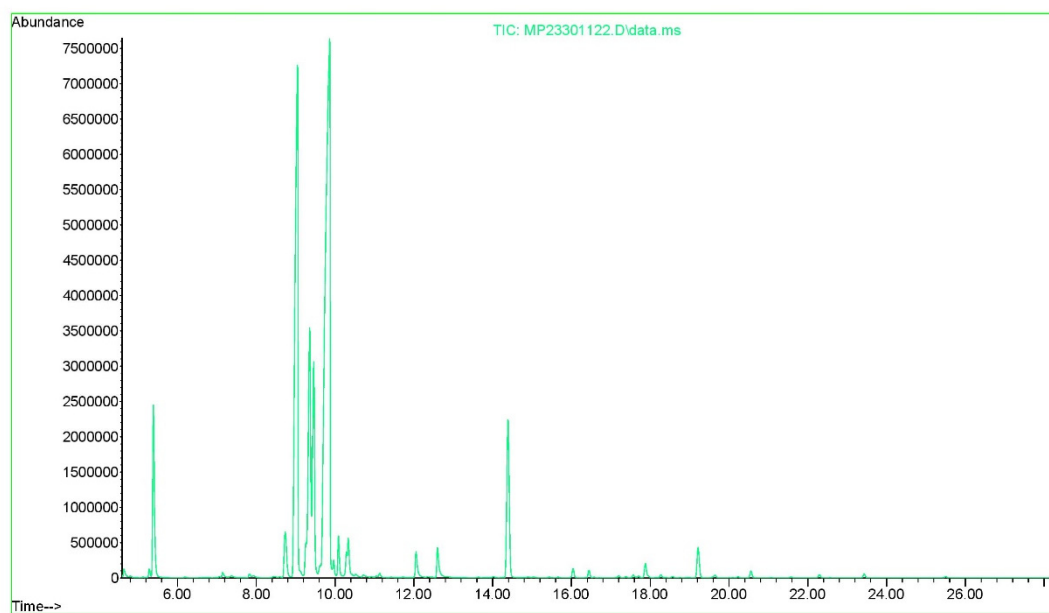

Figure 236 GC-MS chromatogram of *M. x piperita* after 20 days of storage

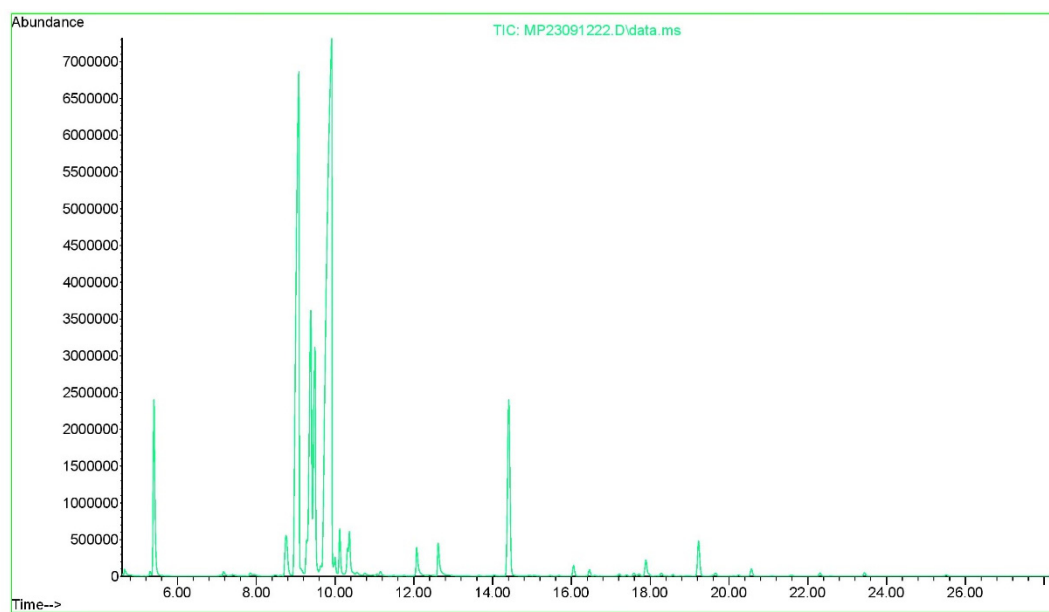

Figure 237 GC-MS chromatogram of *M. x piperita* after 30 days of storage

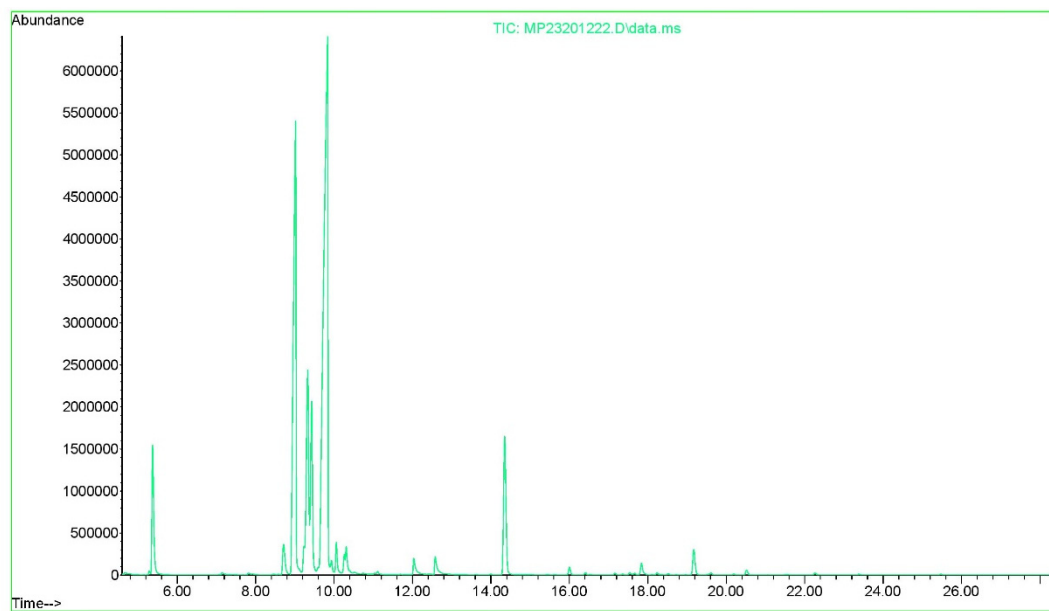

Figure 238 GC-MS chromatogram of *M. x piperita* after 40 days of storage

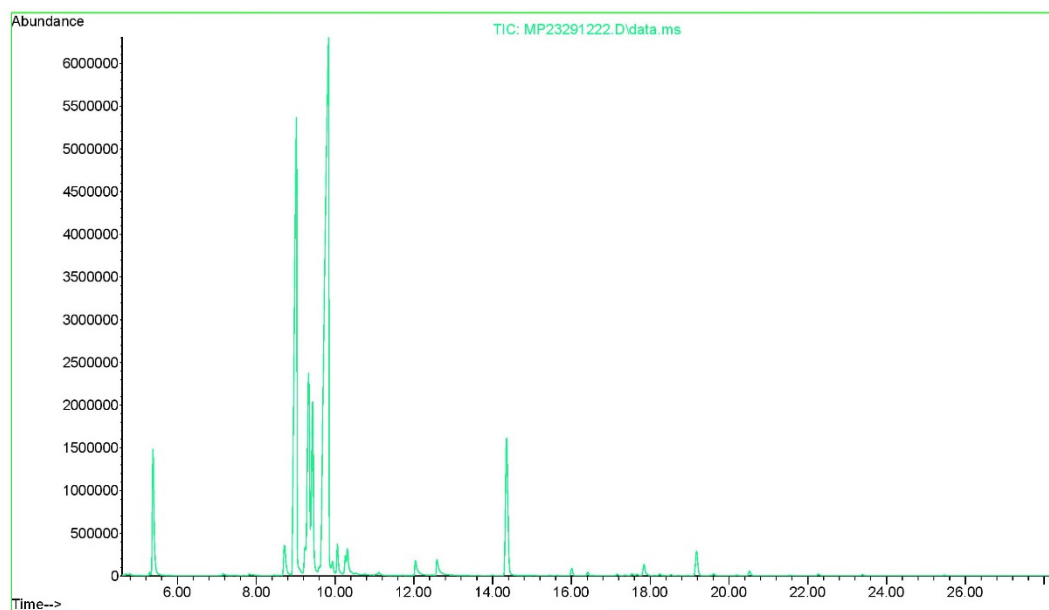

Figure 239 GC-MS chromatogram of *M. x piperita* after 50 days of storage

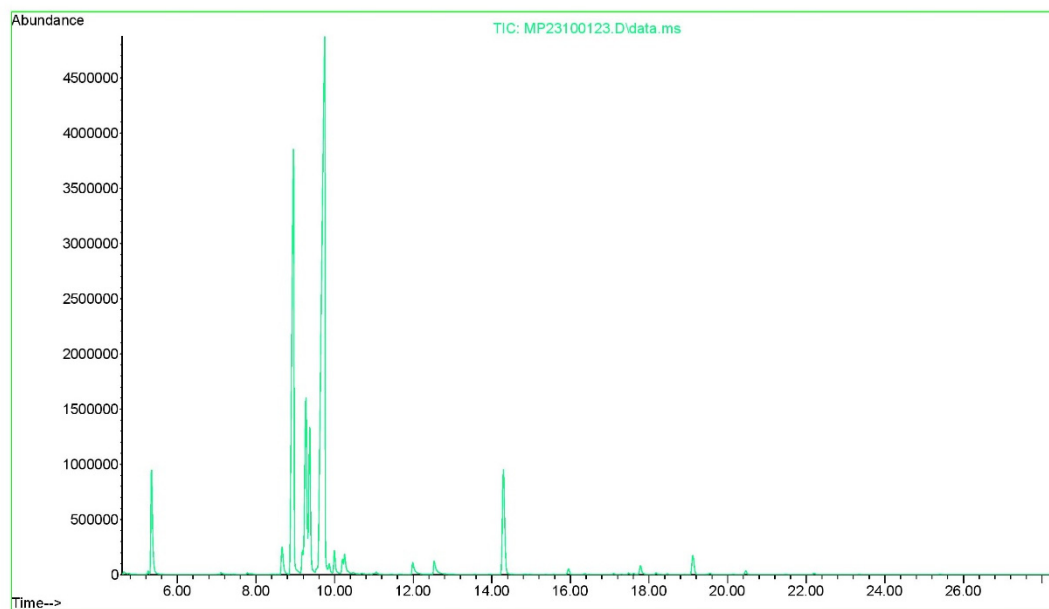

Figure 240 GC-MS chromatogram of *M. x piperita* after 60 days of storage

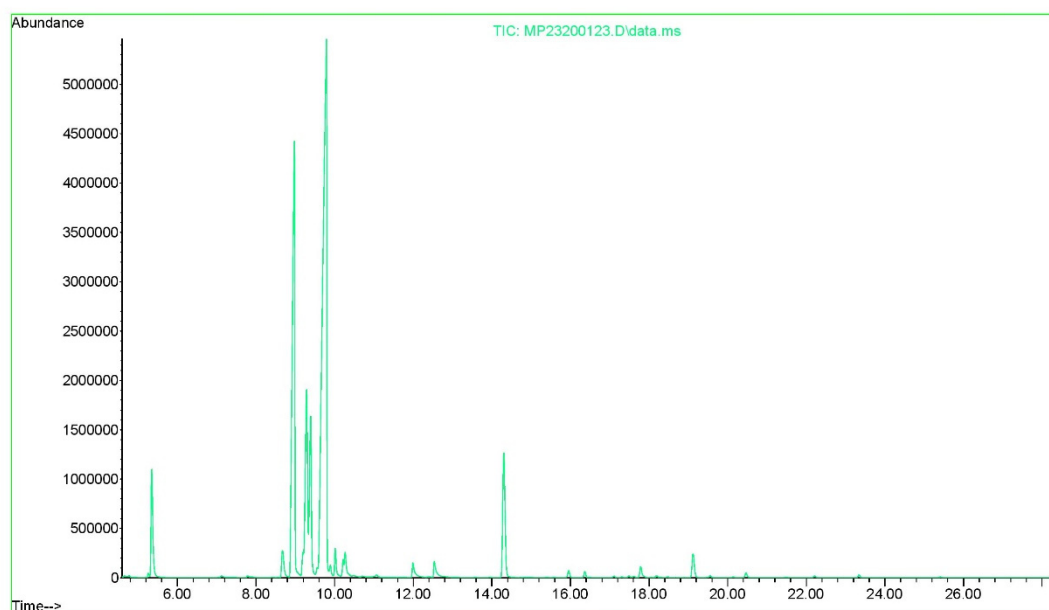

Figure 241 GC-MS chromatogram of *M. x piperita* after 70 days of storage

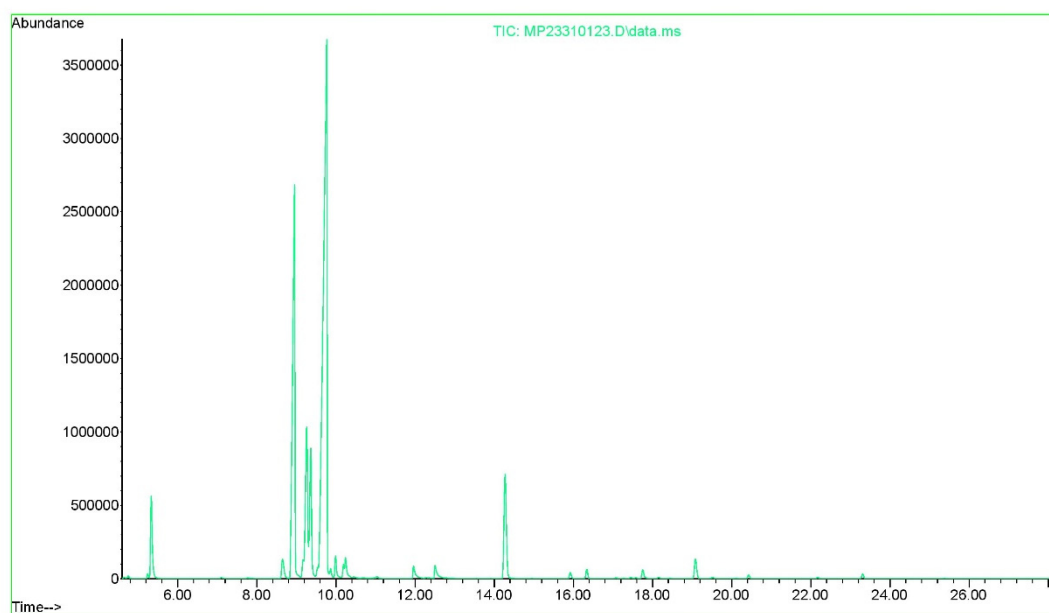

Figure 242 GC-MS chromatogram of *M. x piperita* after 80 days of storage

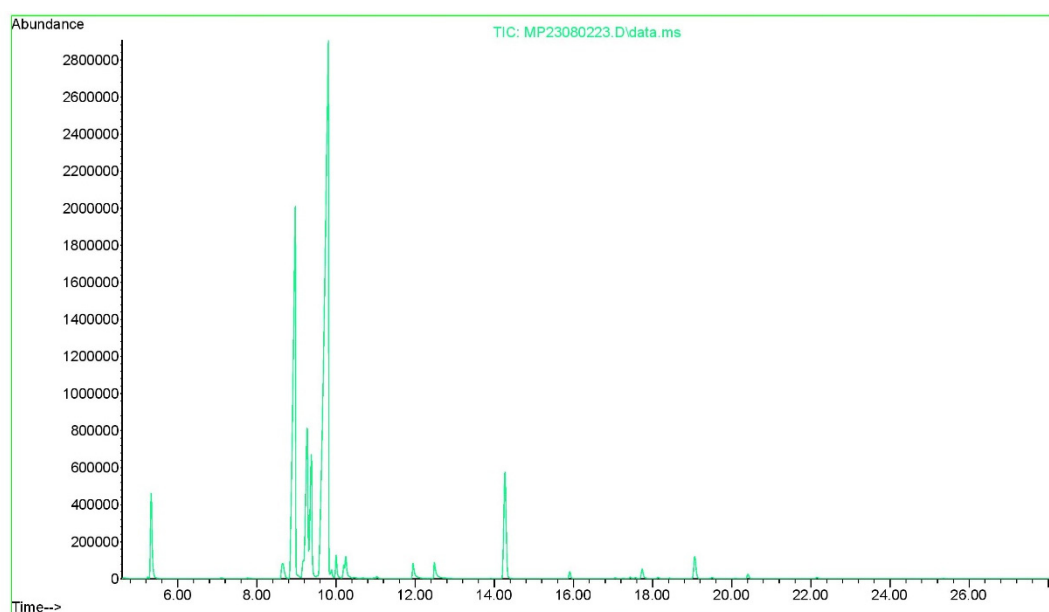

Figure 243 GC-MS chromatogram of *M. x piperita* after 90 days of storage

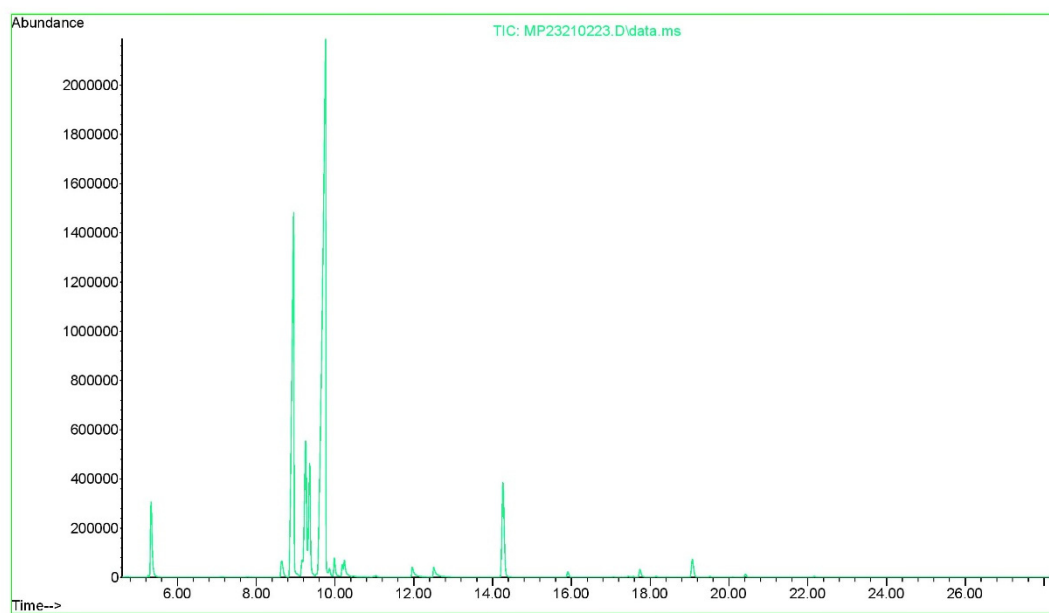

Figure 244 GC-MS chromatogram of *M. x piperita* after 100 days of storage

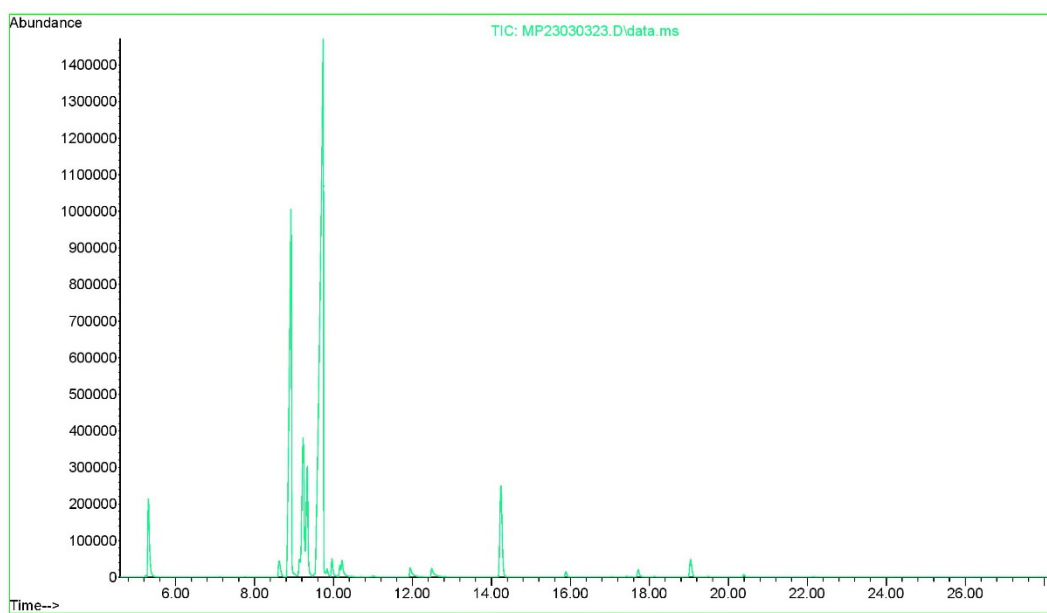

Figure 245 GC-MS chromatogram of *M. x piperita* after 110 days of storage

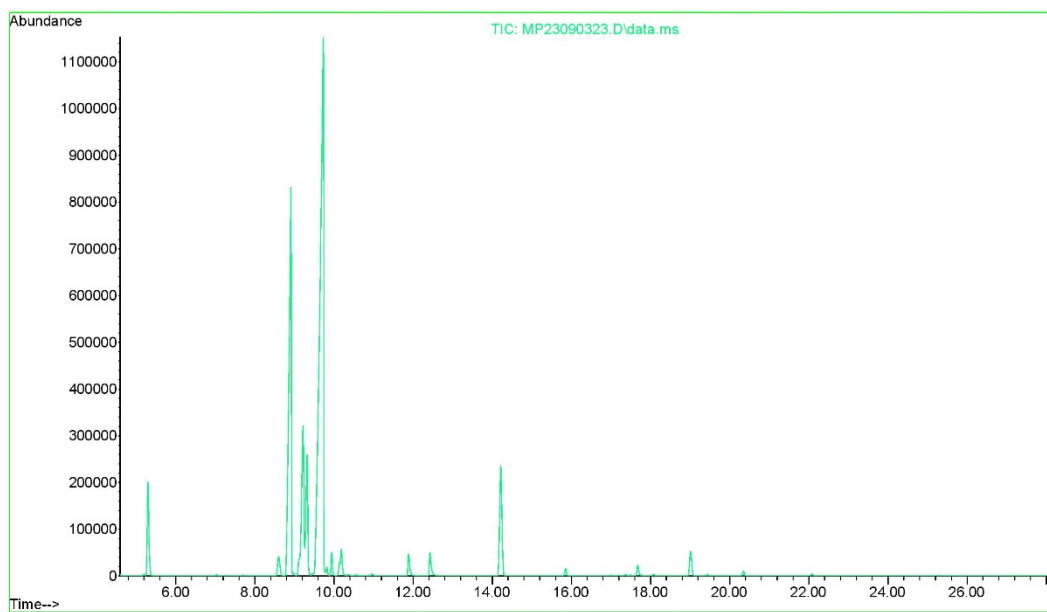

Figure 246 GC-MS chromatogram of *M. x piperita* after 120 days of storage

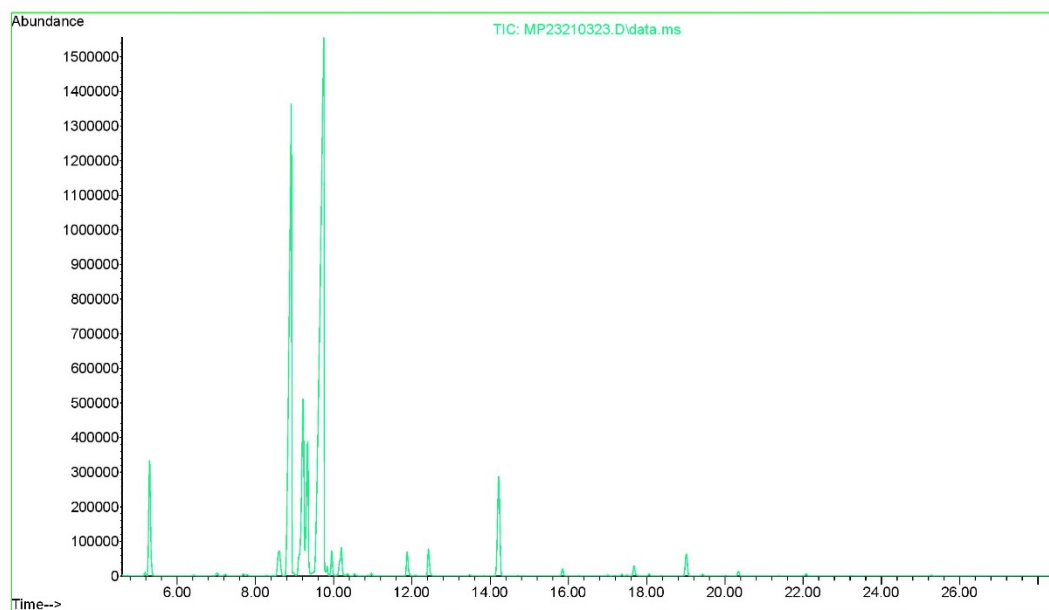

Figure 247 GC-MS chromatogram of *M. x piperita* after 130 days of storage

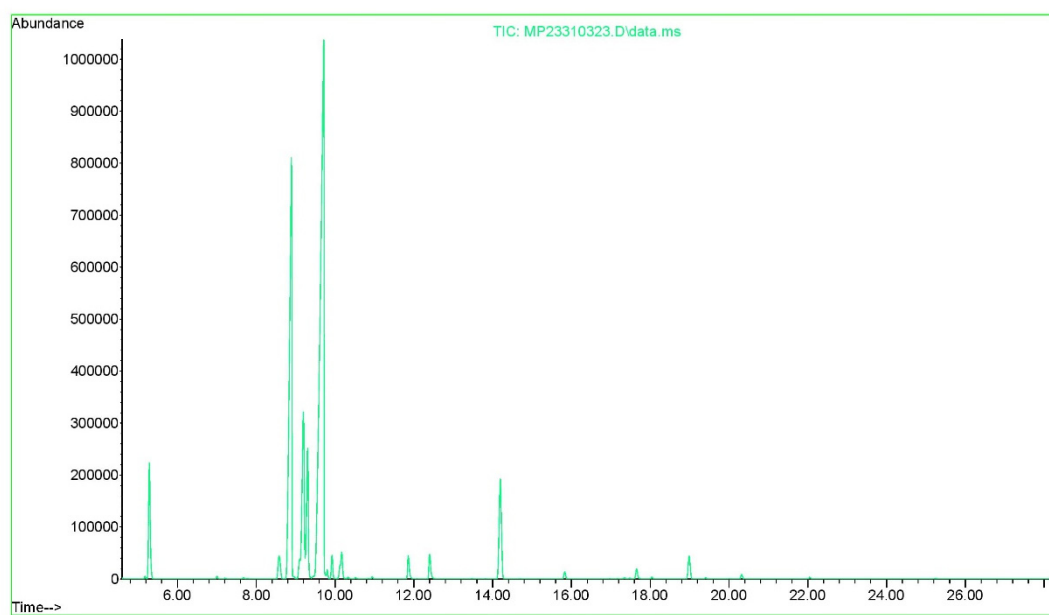

Figure 248 GC-MS chromatogram of *M. x piperita* after 140 days of storage

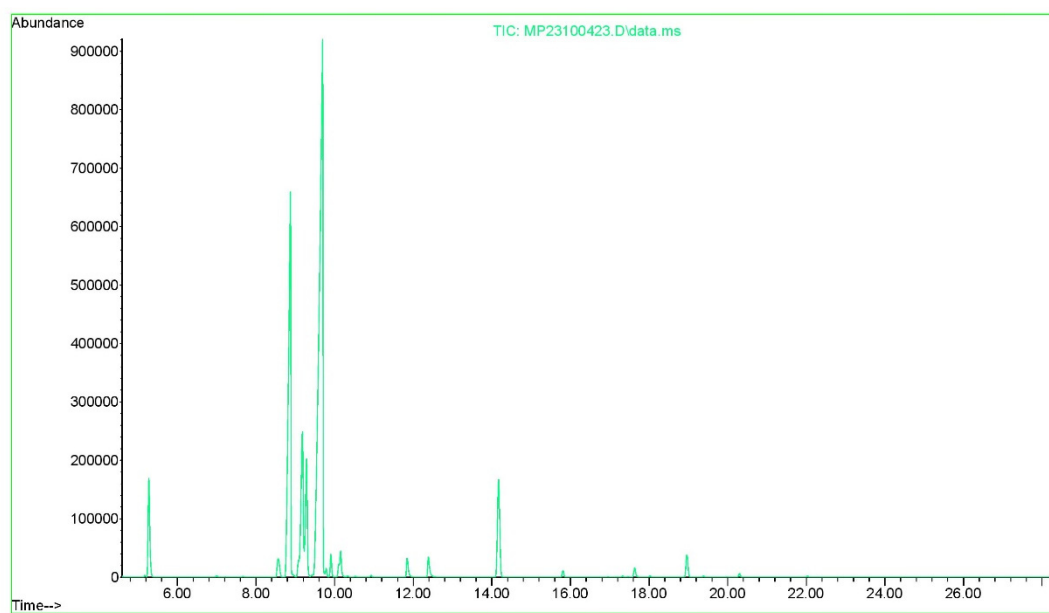

Figure 249 GC-MS chromatogram of *M. x piperita* after 150 days of storage

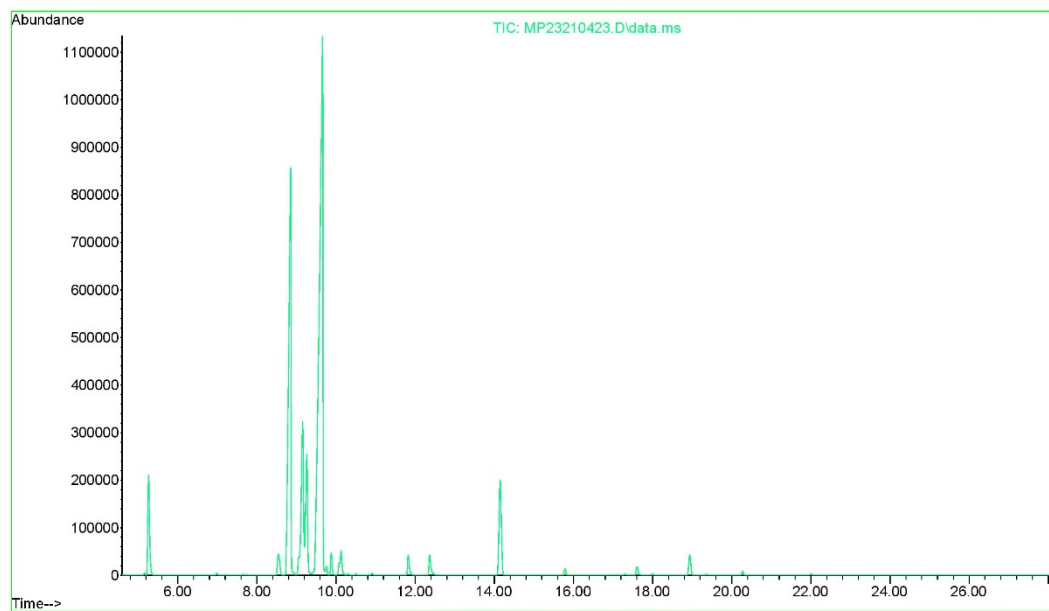

Figure 250 GC-MS chromatogram of *M. x piperita* after 160 days of storage

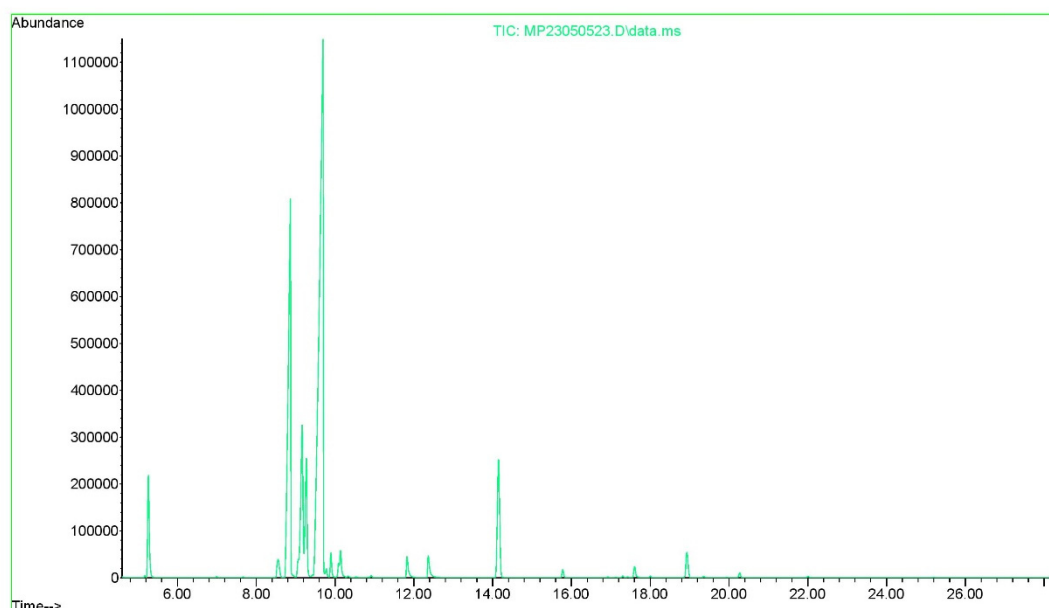

Figure 251 GC-MS chromatogram of *M. x piperita* after 170 days of storage

### 6.3. GC-MS chromatograms of the *M. x piperita* essential oil during storage in glass tubes sealed with cap under direct sunlight exposure for 6 months

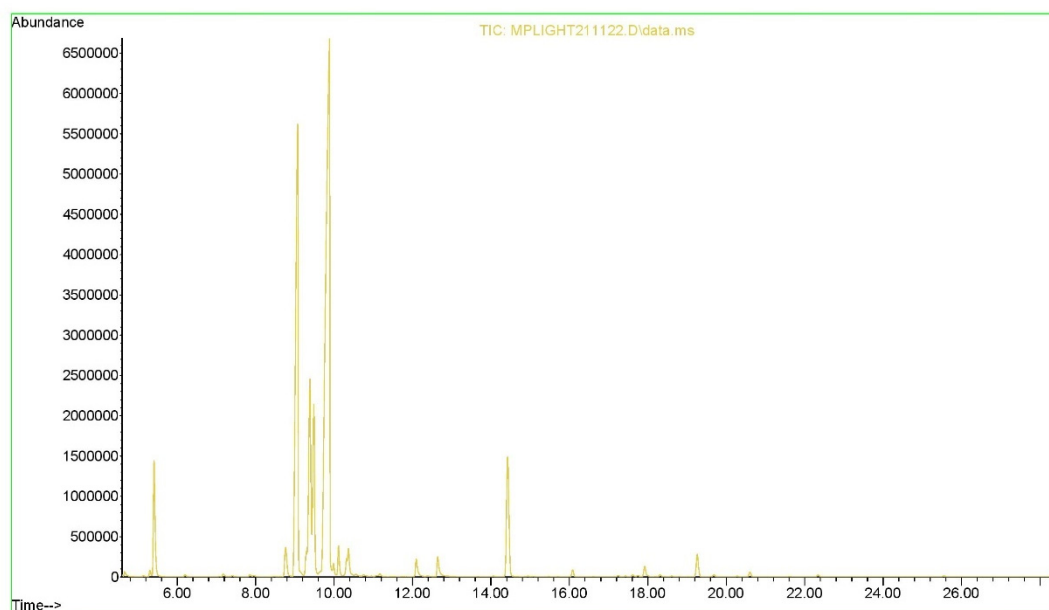

Figure 252 GC-MS chromatogram of *M. x piperita* after 10 days of storage

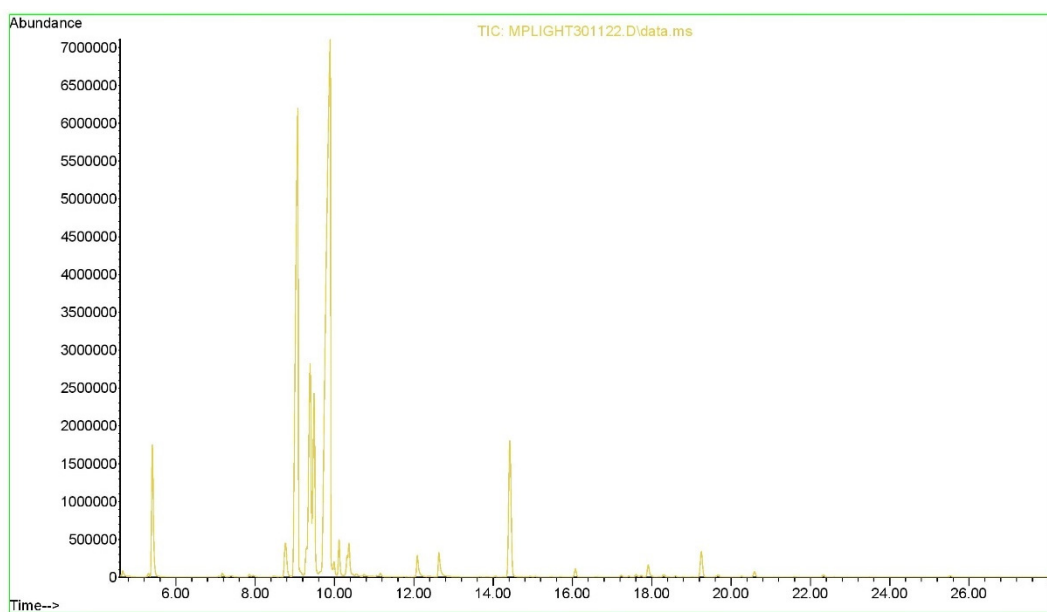

Figure 253 GC-MS chromatogram of *M. x piperita* after 20 days of storage

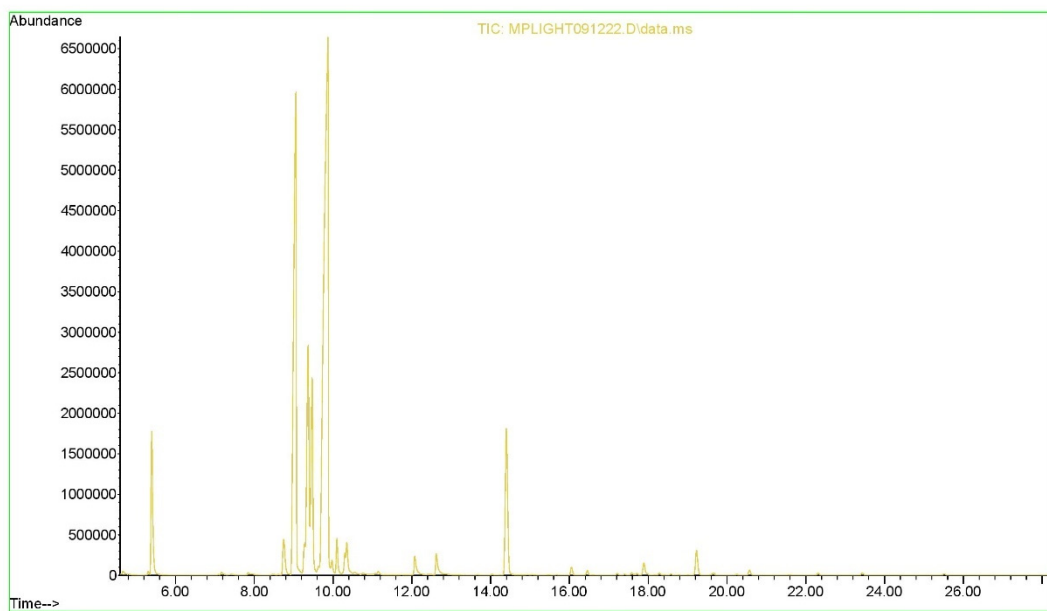

Figure 254 GC-MS chromatogram of *M. x piperita* after 30 days of storage

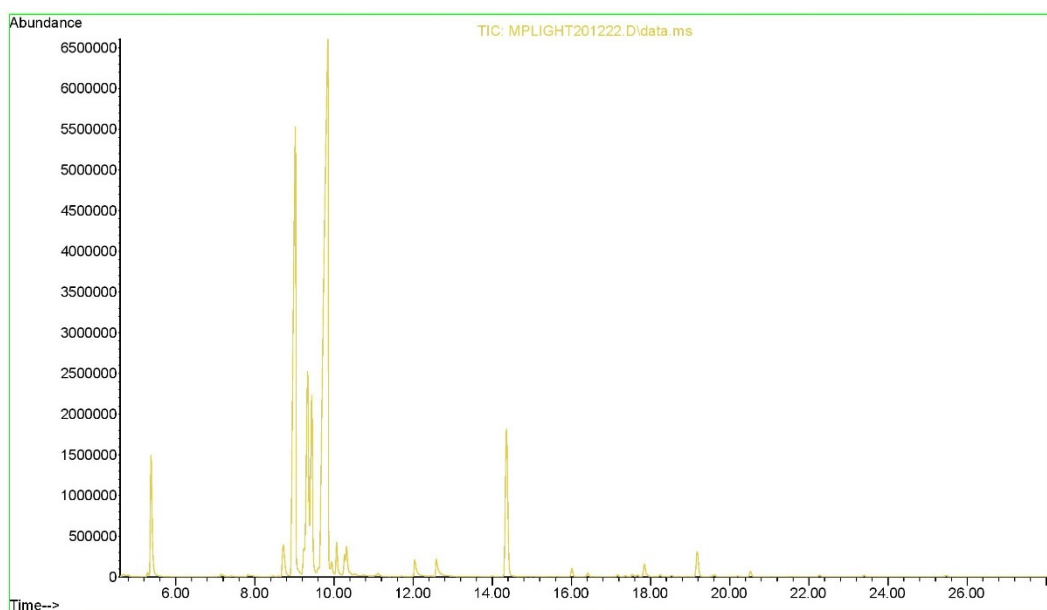

Figure 255 GC-MS chromatogram of *M. x piperita* after 40 days of storage

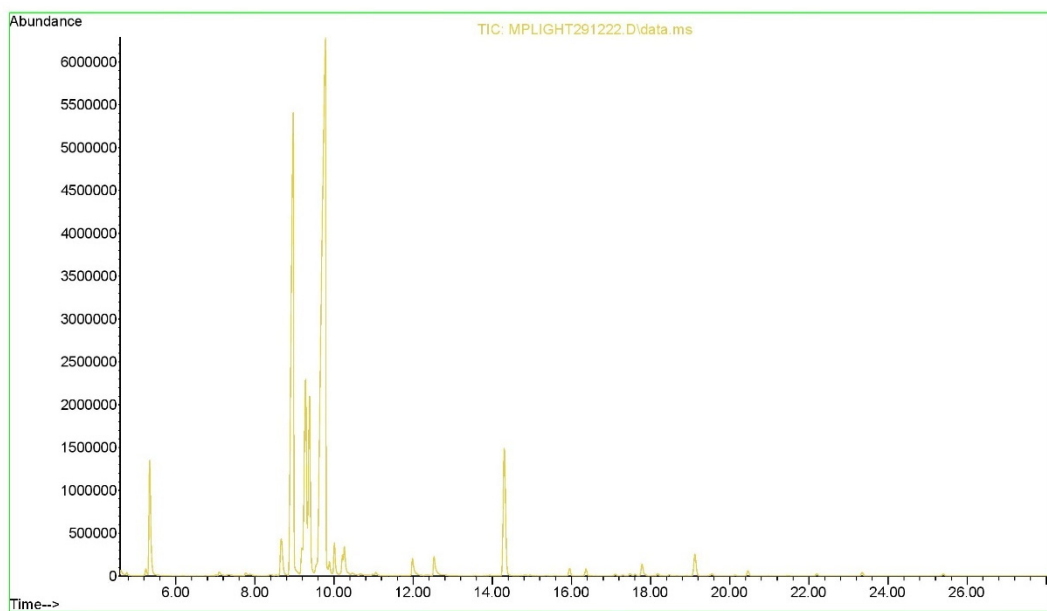

Figure 256 GC-MS chromatogram of *M. x piperita* after 50 days of storage

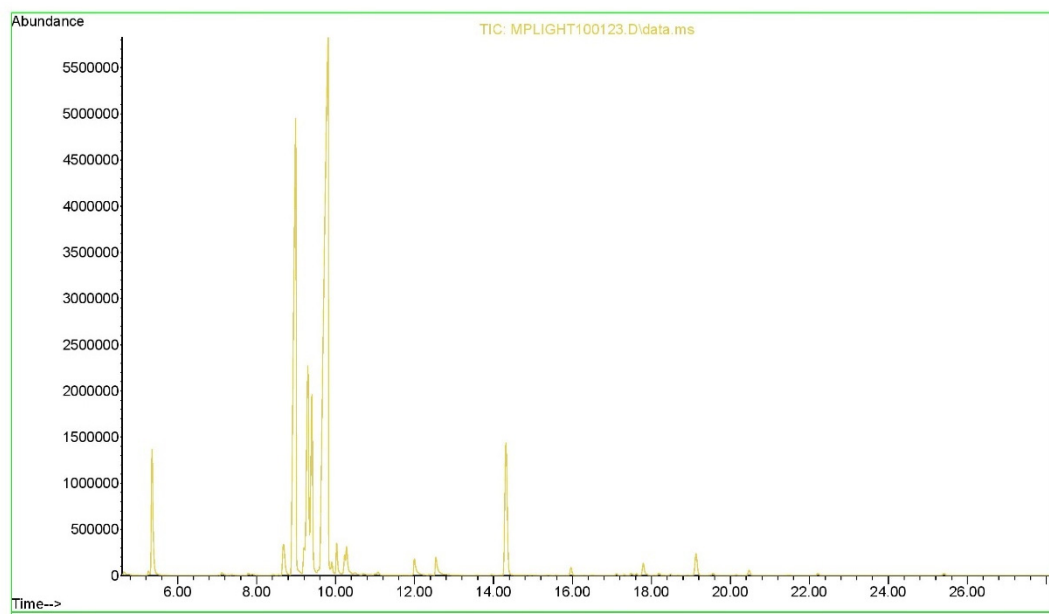

Figure 257 GC-MS chromatogram of *M. x piperita* after 60 days of storage

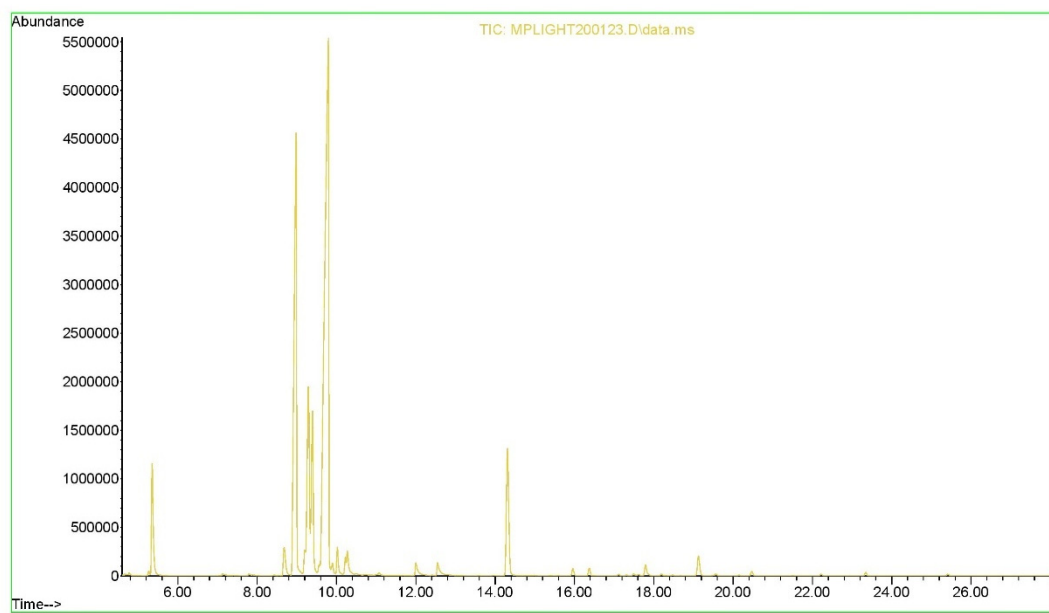

Figure 258 GC-MS chromatogram of *M. x piperita* after 70 days of storage

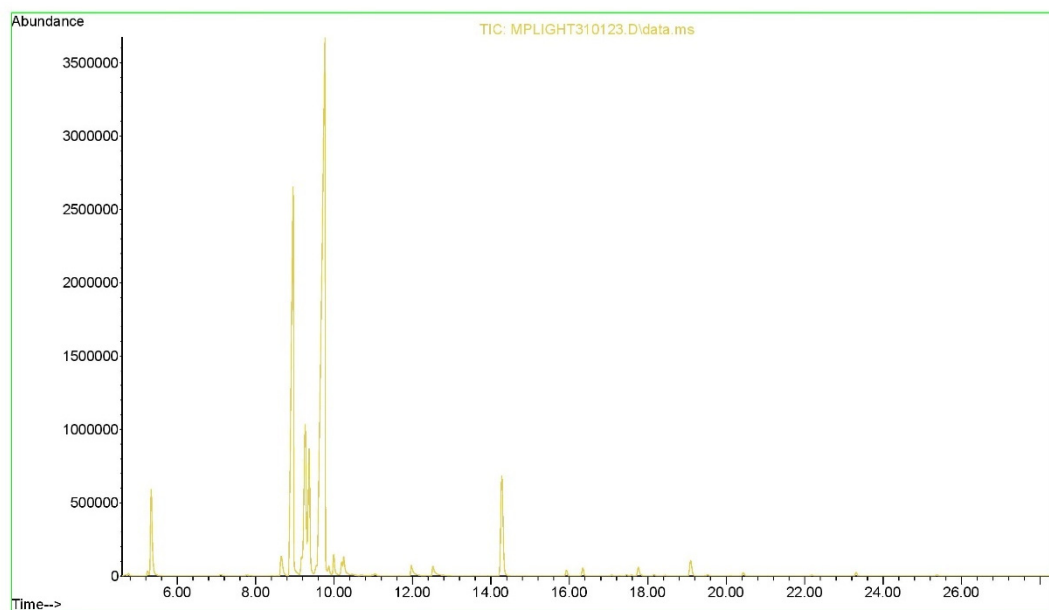

Figure 259 GC-MS chromatogram of *M. x piperita* after 80 days of storage

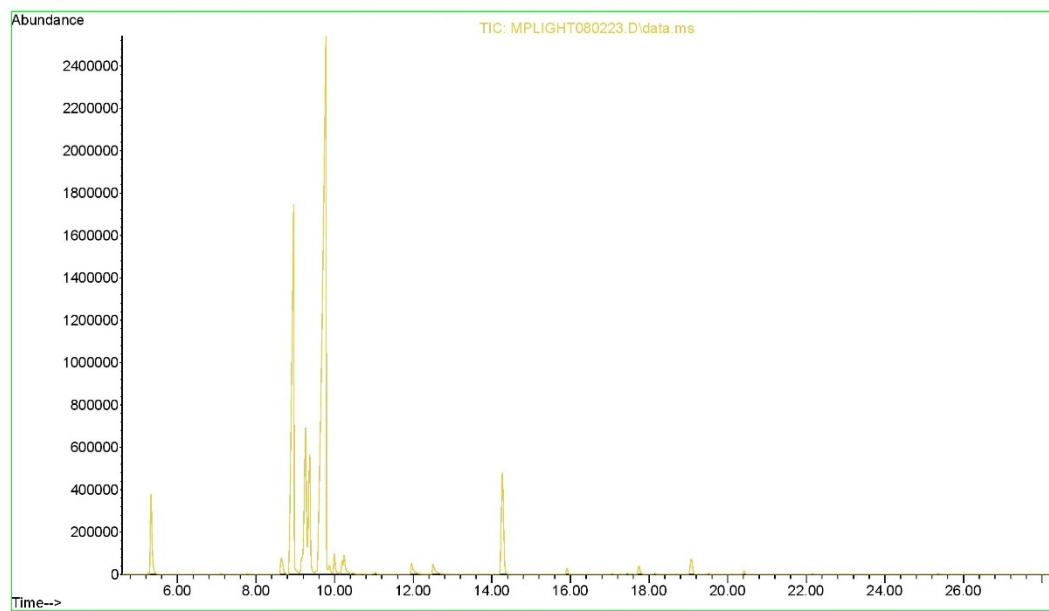

Figure 260 GC-MS chromatogram of *M. x piperita* after 90 days of storage

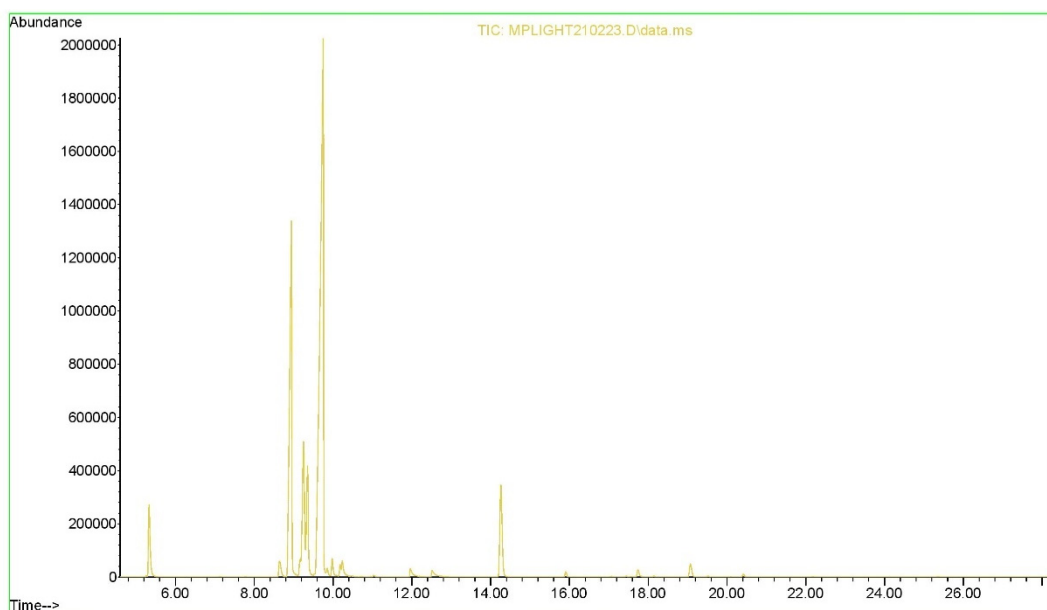

Figure 261 GC-MS chromatogram of *M. x piperita* after 100 days of storage

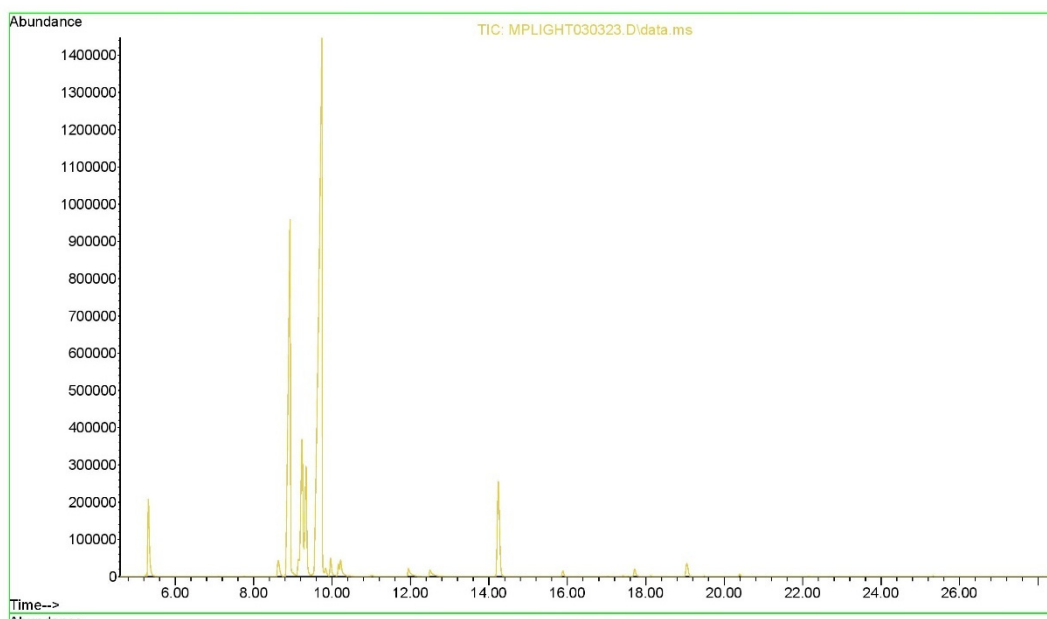

Figure 262 GC-MS chromatogram of *M. x piperita* after 110 days of storage

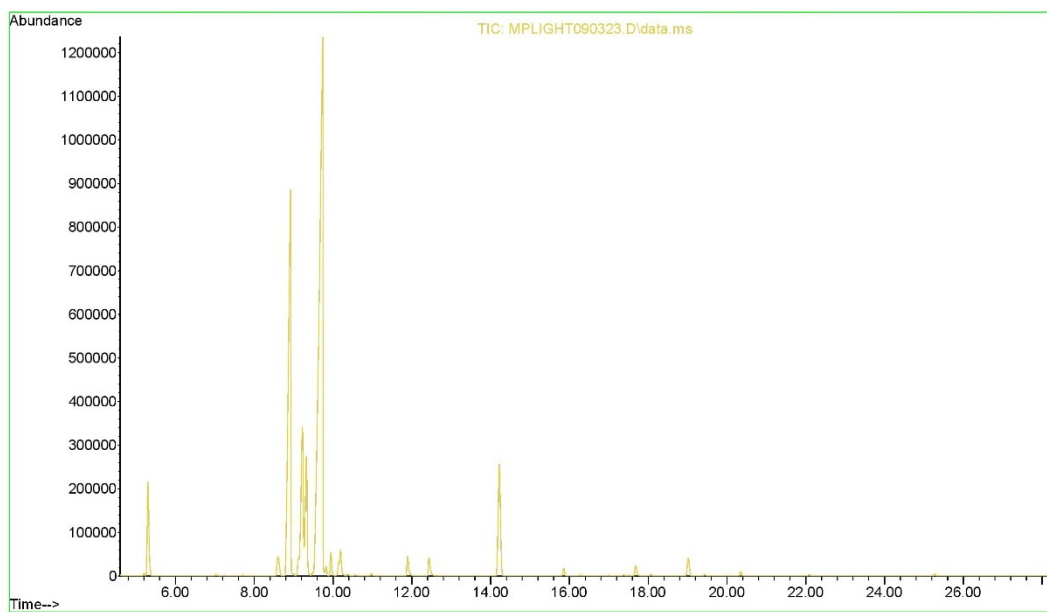

Figure 263 GC-MS chromatogram of *M. x piperita* after 120 days of storage

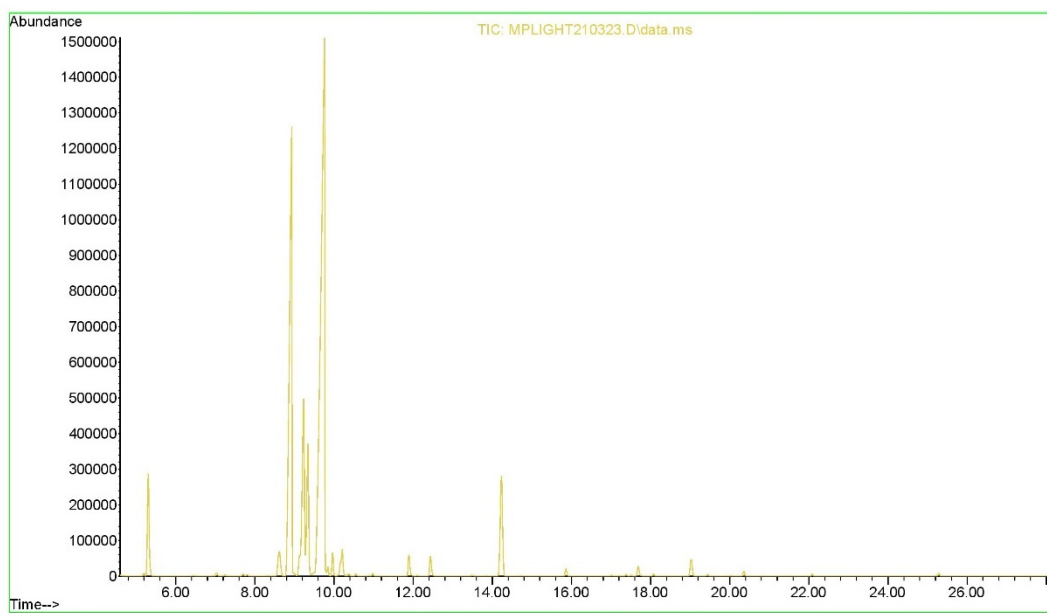

Figure 264 GC-MS chromatogram of *M. x piperita* after 130 days of storage

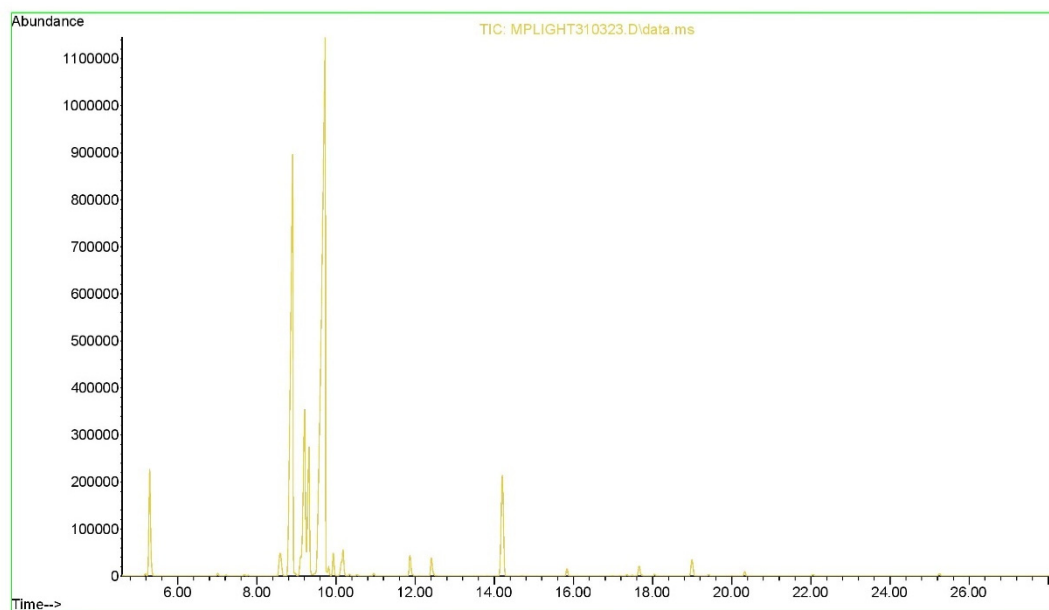

Figure 265 GC-MS chromatogram of *M. x piperita* after 140 days of storage

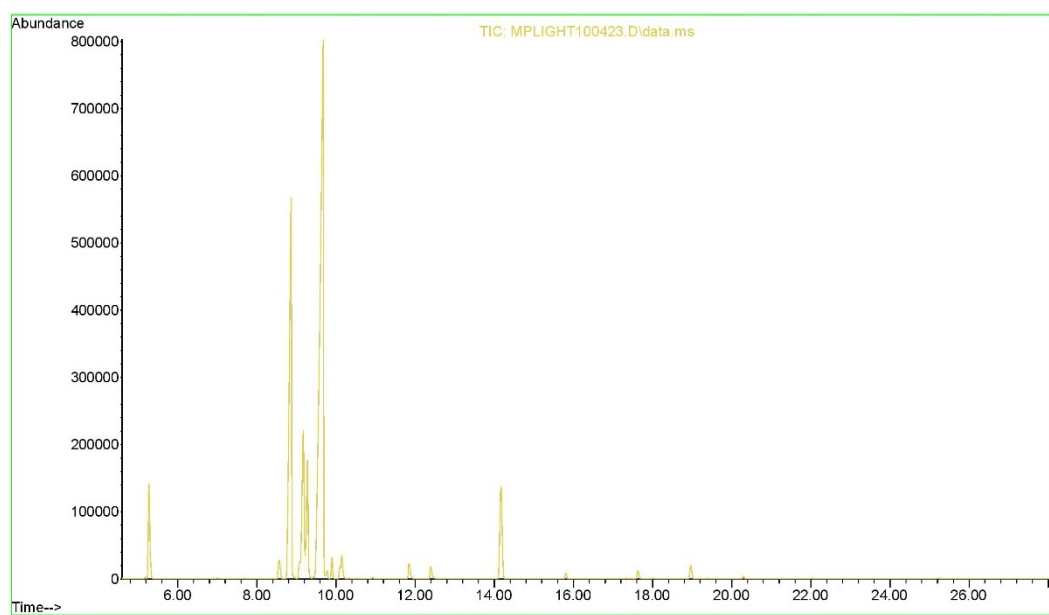

Figure 266 GC-MS chromatogram of *M. x piperita* after 150 days of storage

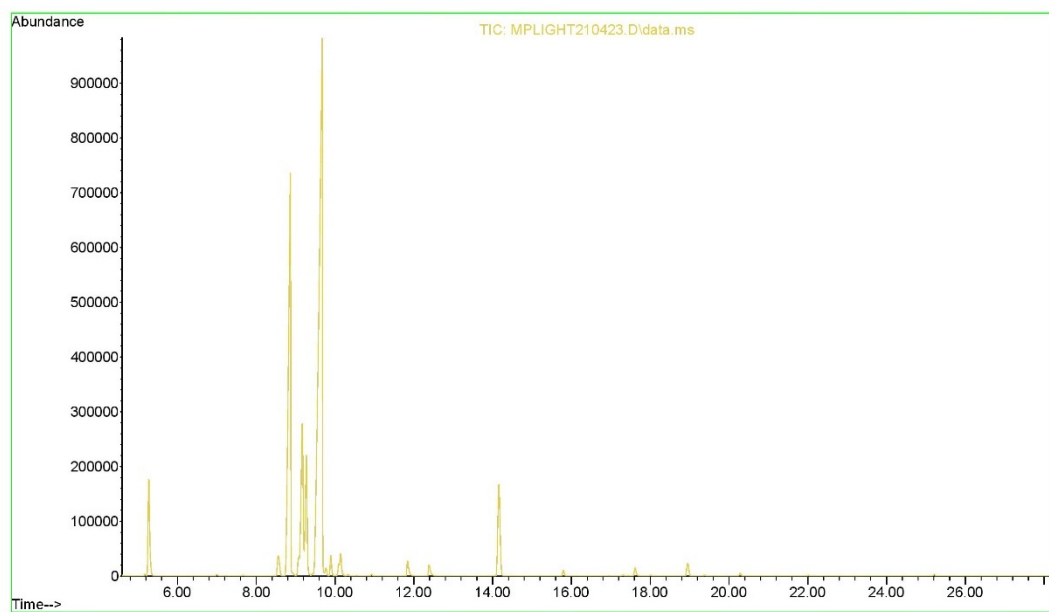

Figure 267 GC-MS chromatogram of *M. x piperita* after 160 days of storage

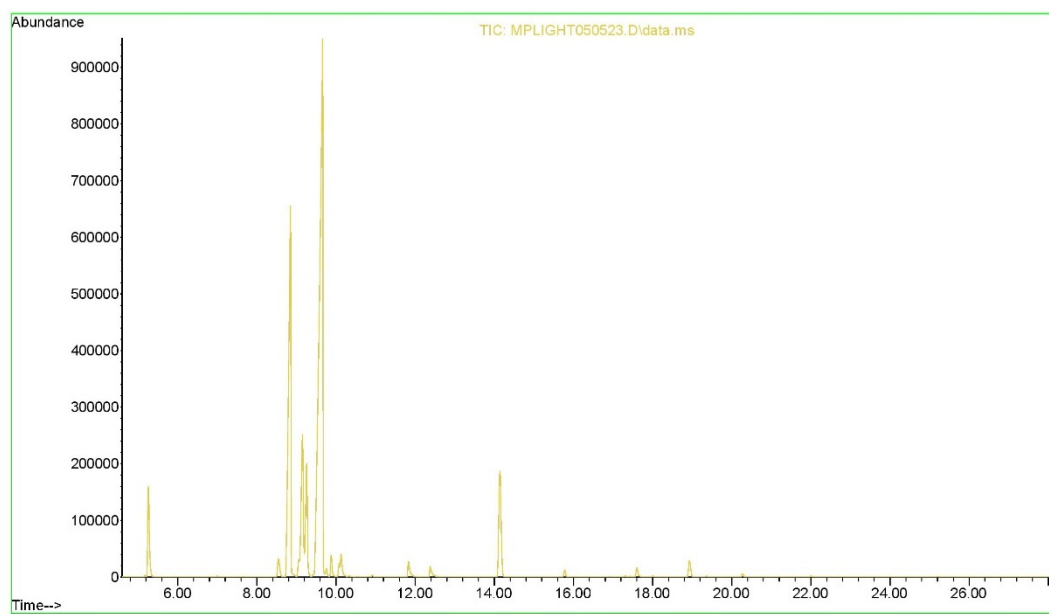

Figure 268 GC-MS chromatogram of *M. x piperita* after 170 days of storage

#### 6.4. GC-MS chromatograms of the *M. x piperita* essential oil during storage in sealed glass ampoules at 35 °C for 3 months

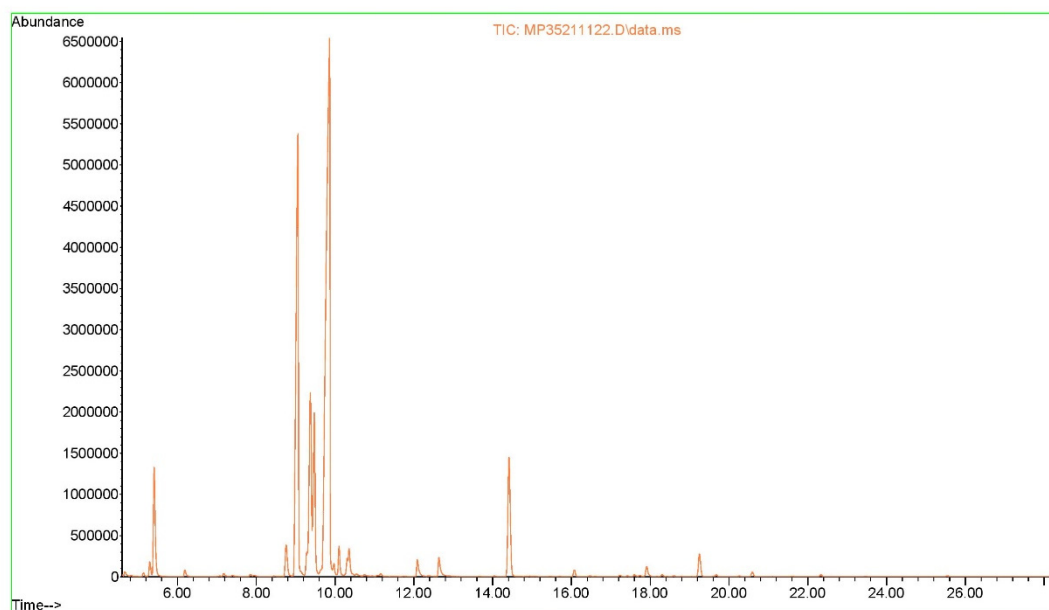

Figure 269 GC-MS chromatogram of *M. x piperita* after 10 days of storage

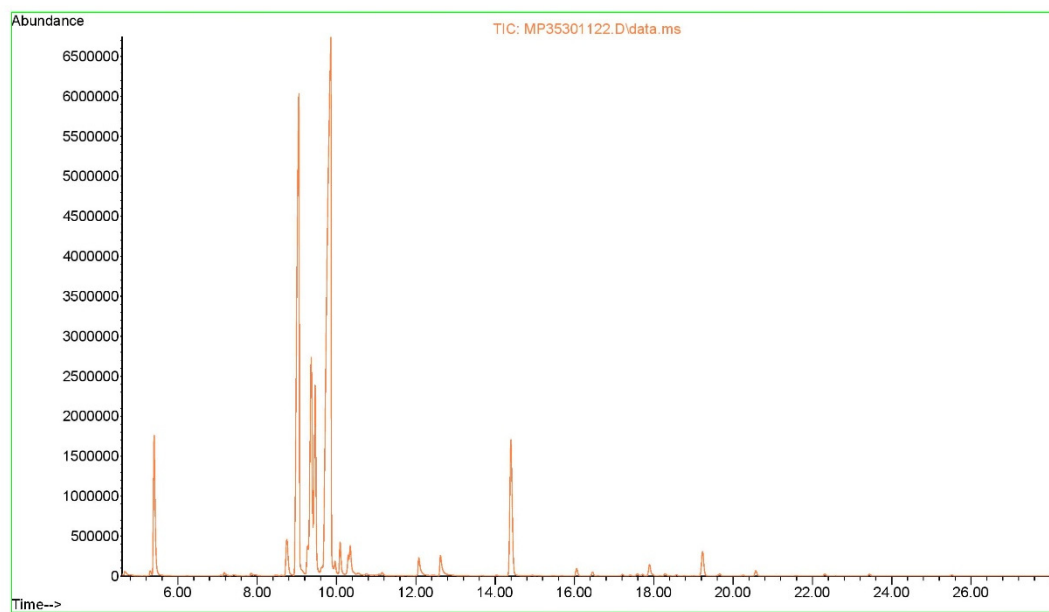

Figure 270 GC-MS chromatogram of *M. x piperita* after 20 days of storage

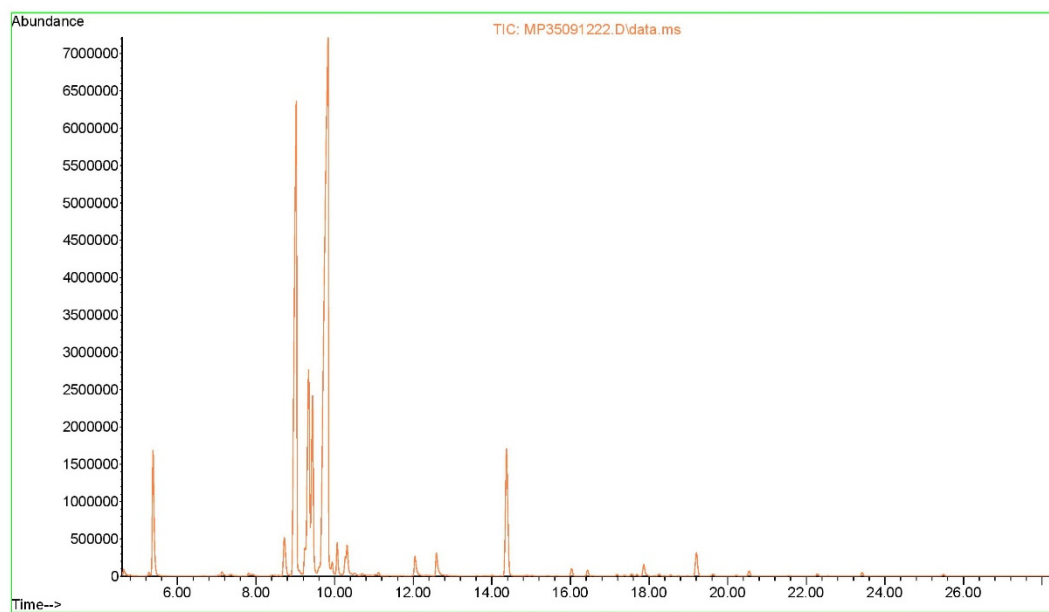

Figure 271 GC-MS chromatogram of *M. x piperita* after 30 days of storage

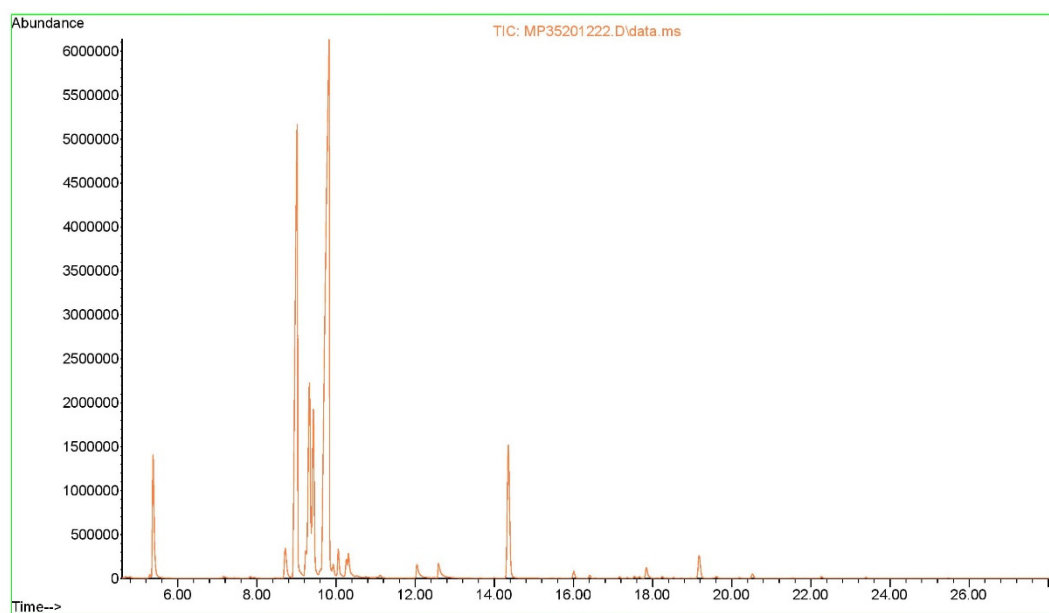

Figure 272 GC-MS chromatogram of *M. x piperita* after 40 days of storage

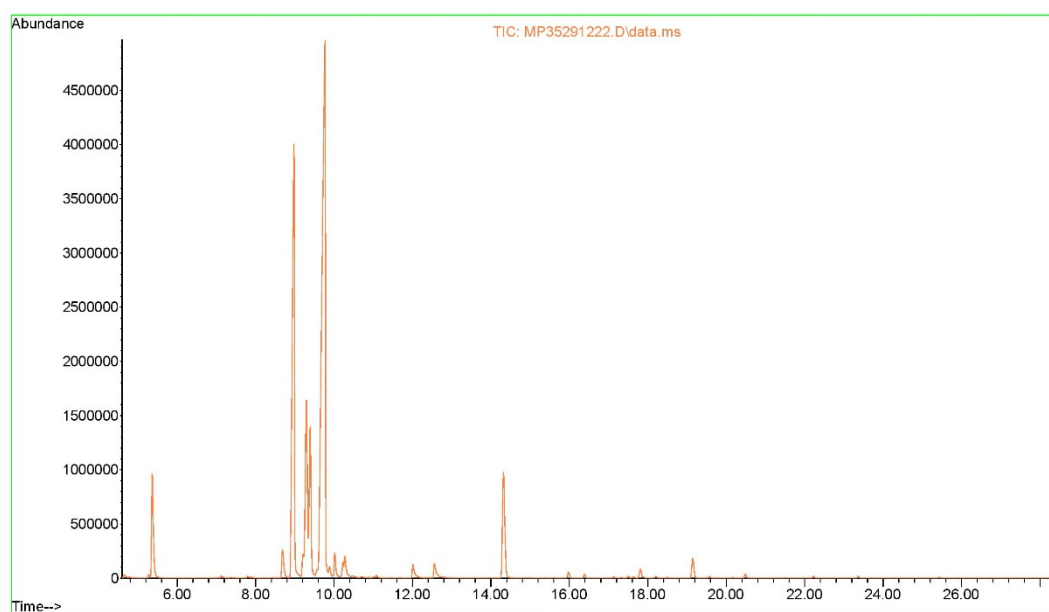

Figure 273 GC-MS chromatogram of *M. x piperita* after 50 days of storage

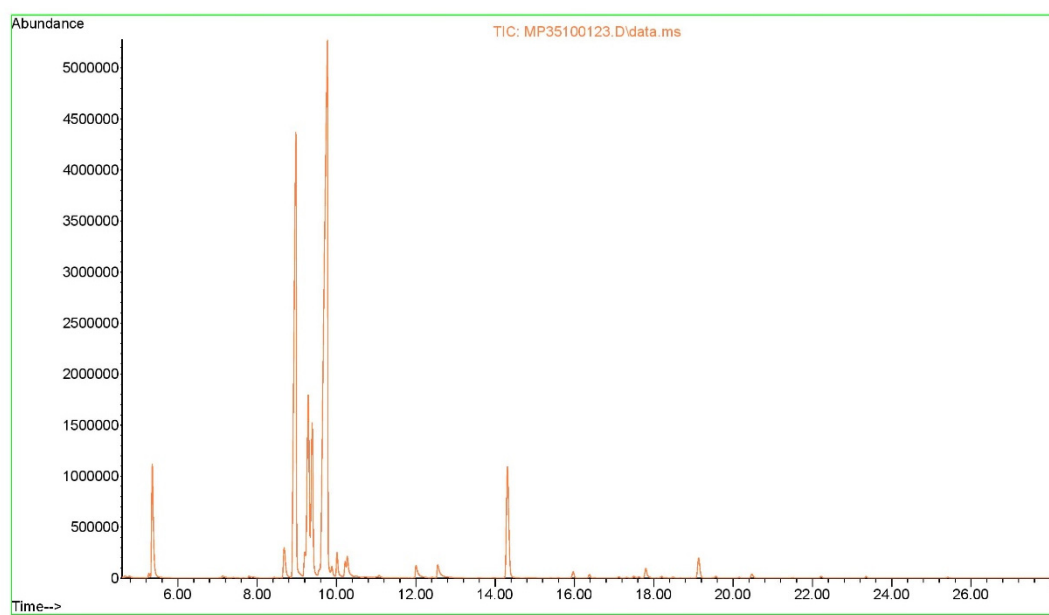

Figure 274 GC-MS chromatogram of *M. x piperita* after 60 days of storage

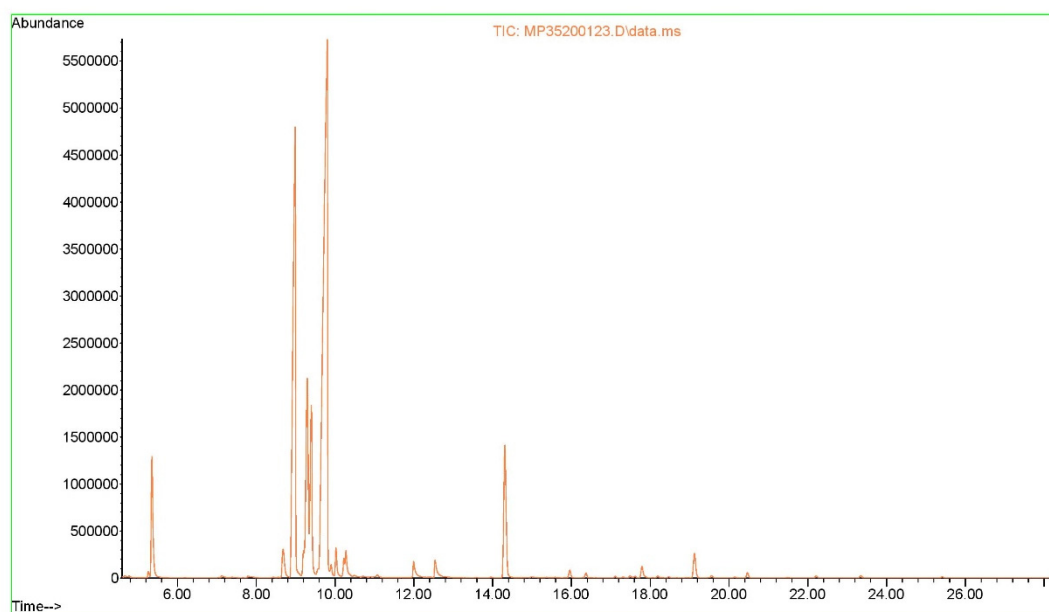

Figure 275 GC-MS chromatogram of *M. x piperita* after 70 days of storage

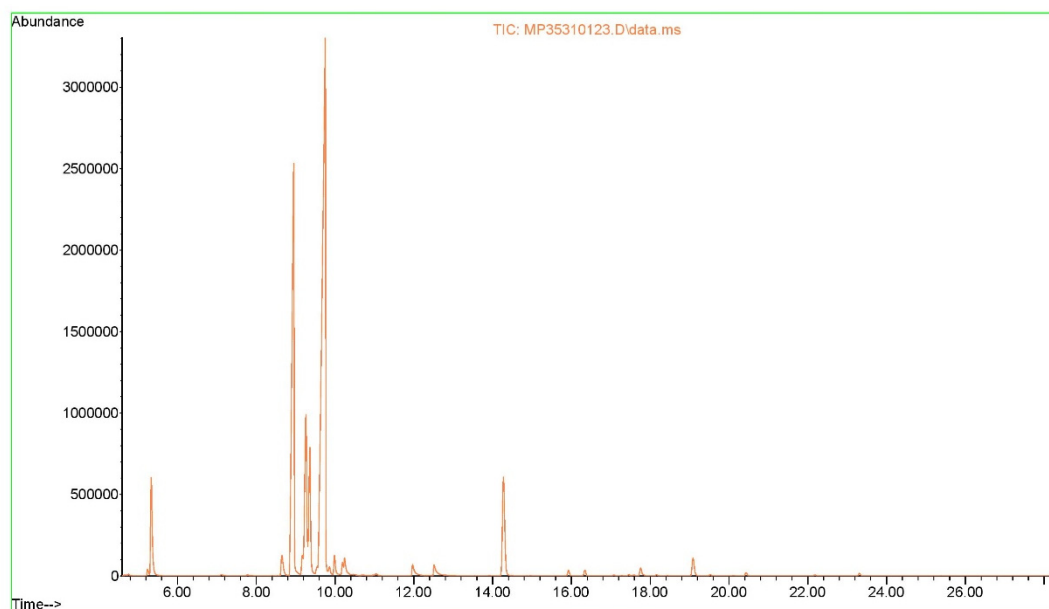

Figure 276 GC-MS chromatogram of *M. x piperita* after 80 days of storage

### 6.5. GC-MS chromatograms of the *M. x piperita* essential oil during storage in sealed glass ampoules at 45 °C for 3 months

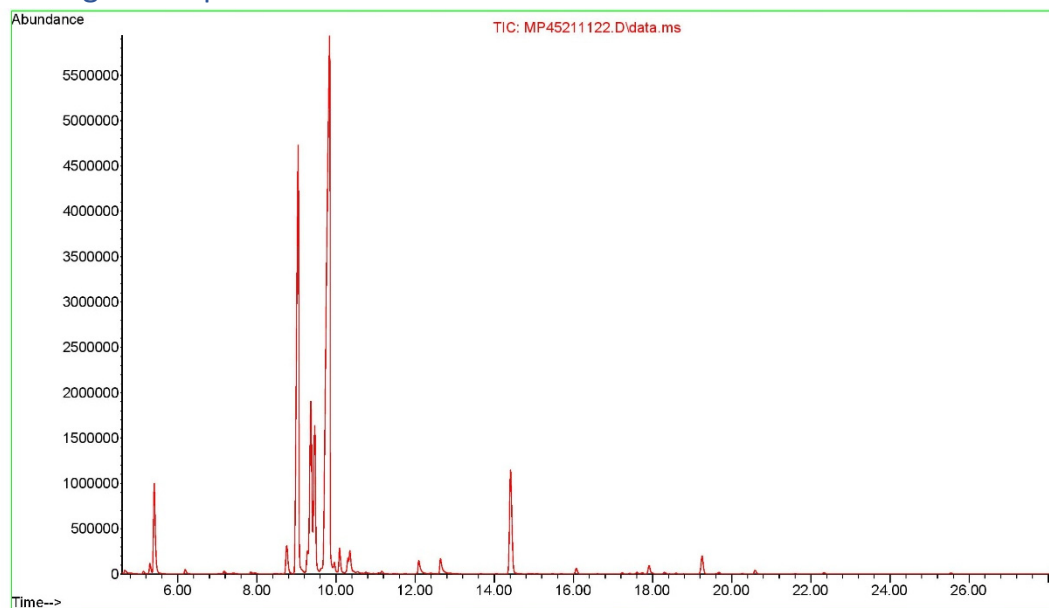

Figure 277 GC-MS chromatogram of *M. x piperita* after 10 days of storage

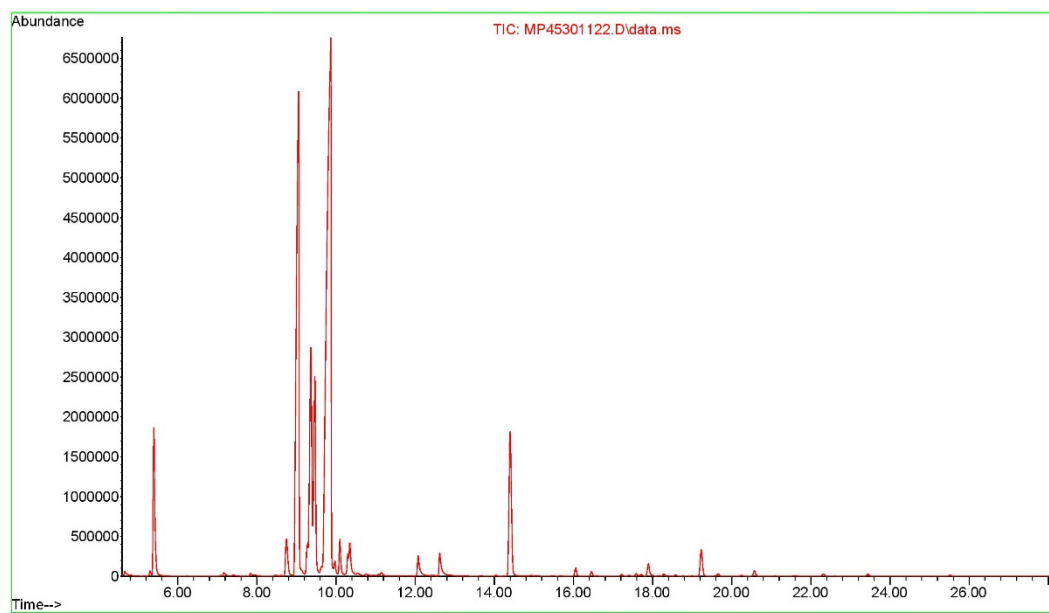

Figure 278 GC-MS chromatogram of *M. x piperita* after 20 days of storage

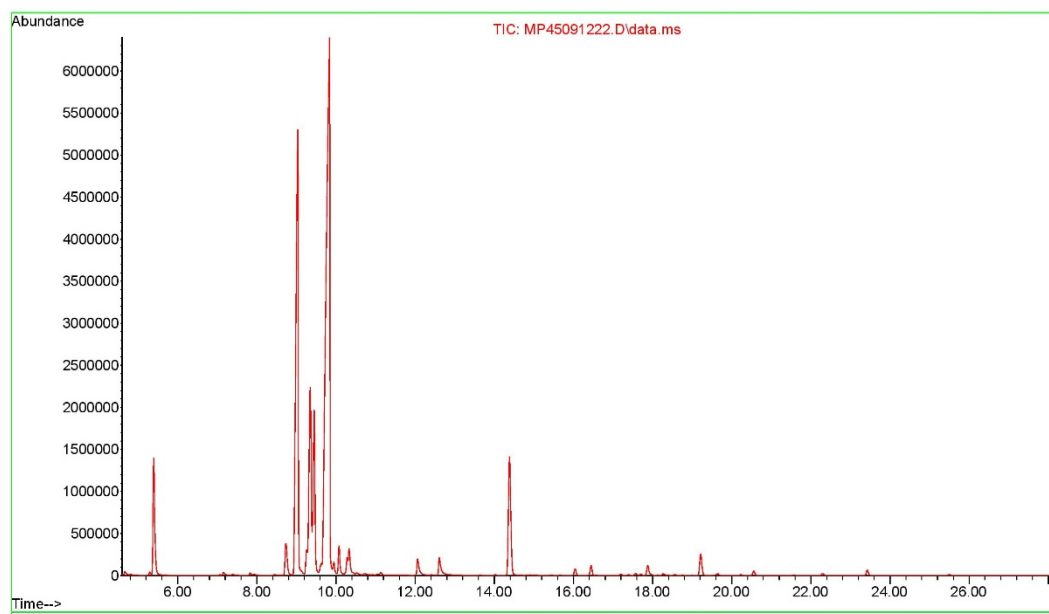

Figure 279 GC-MS chromatogram of *M. x piperita* after 30 days of storage

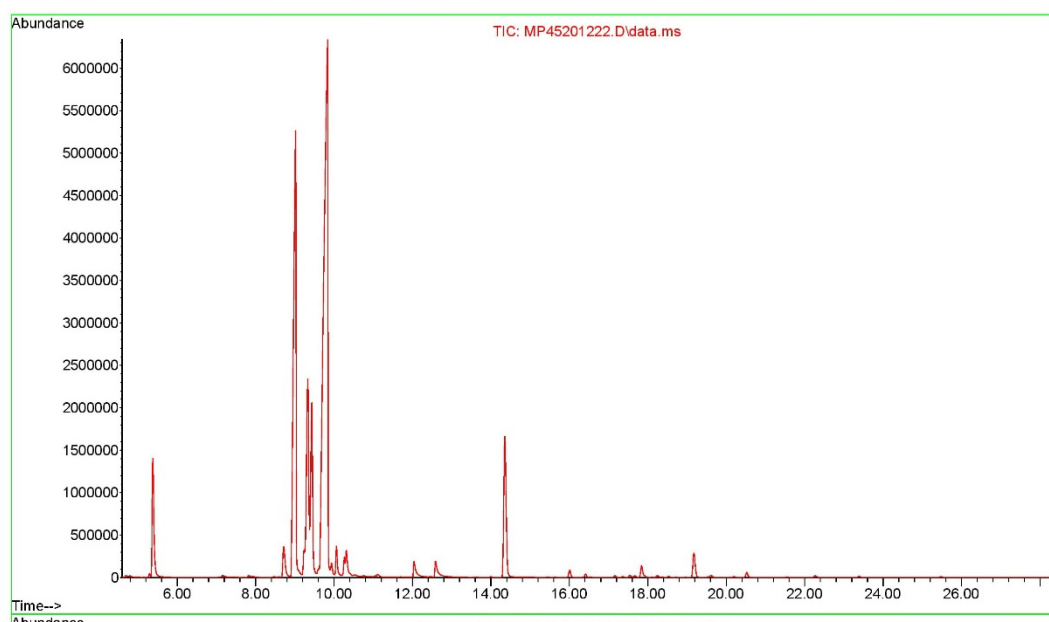

Figure 280 GC-MS chromatogram of *M. x piperita* after 40 days of storage

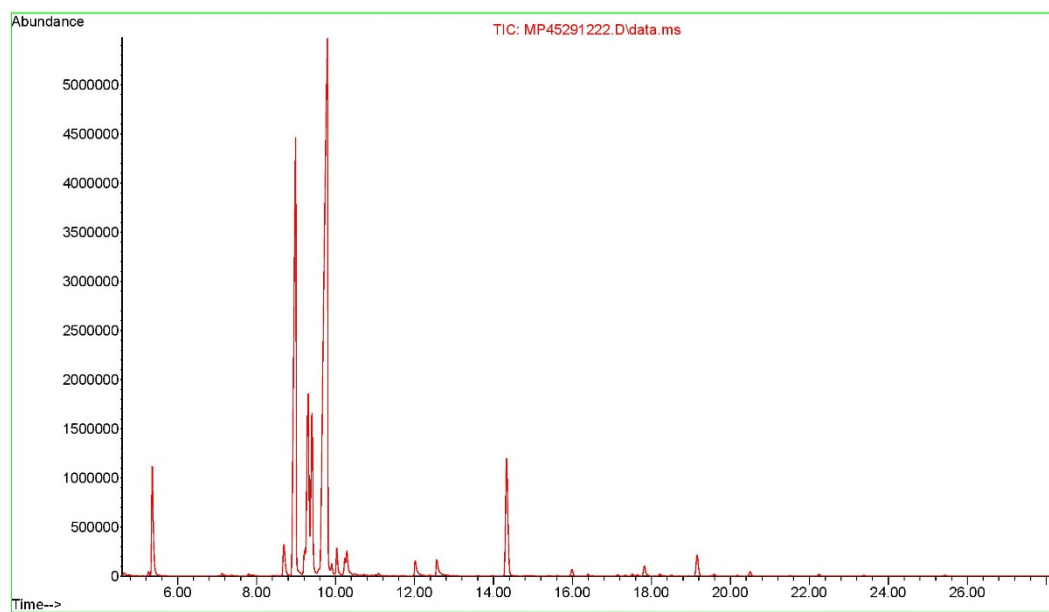

Figure 281 GC-MS chromatogram of *M. x piperita* after 50 days of storage

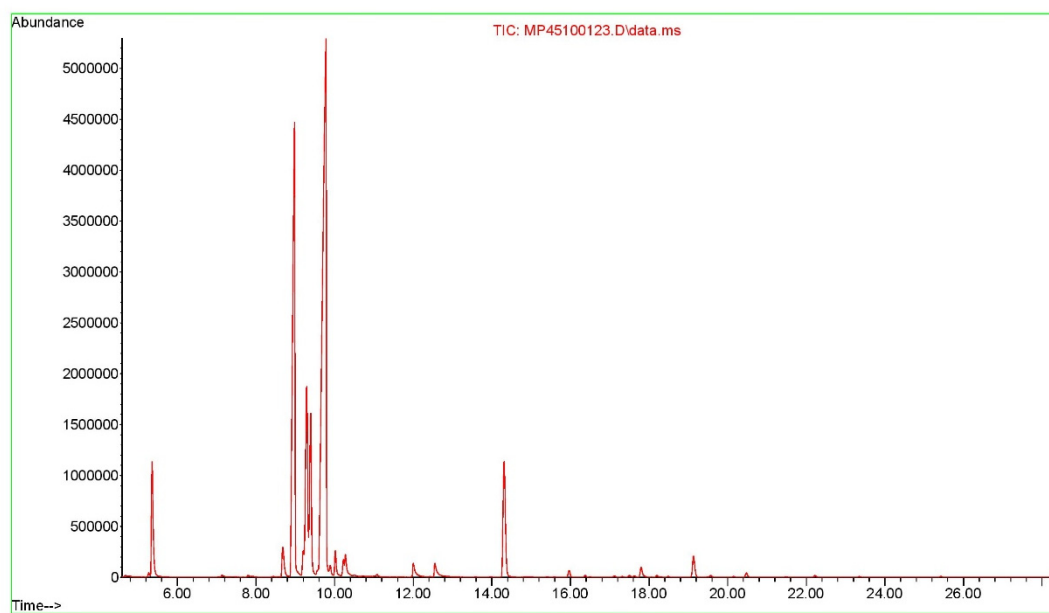

Figure 282 GC-MS chromatogram of *M. x piperita* after 60 days of storage

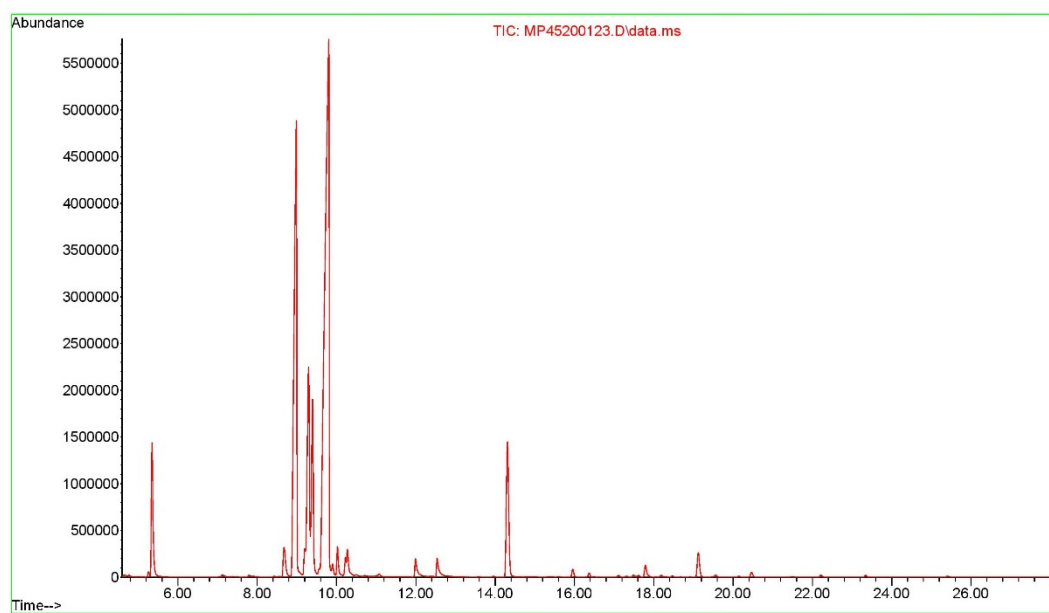

Figure 283 GC-MS chromatogram of *M. x piperita* after 70 days of storage

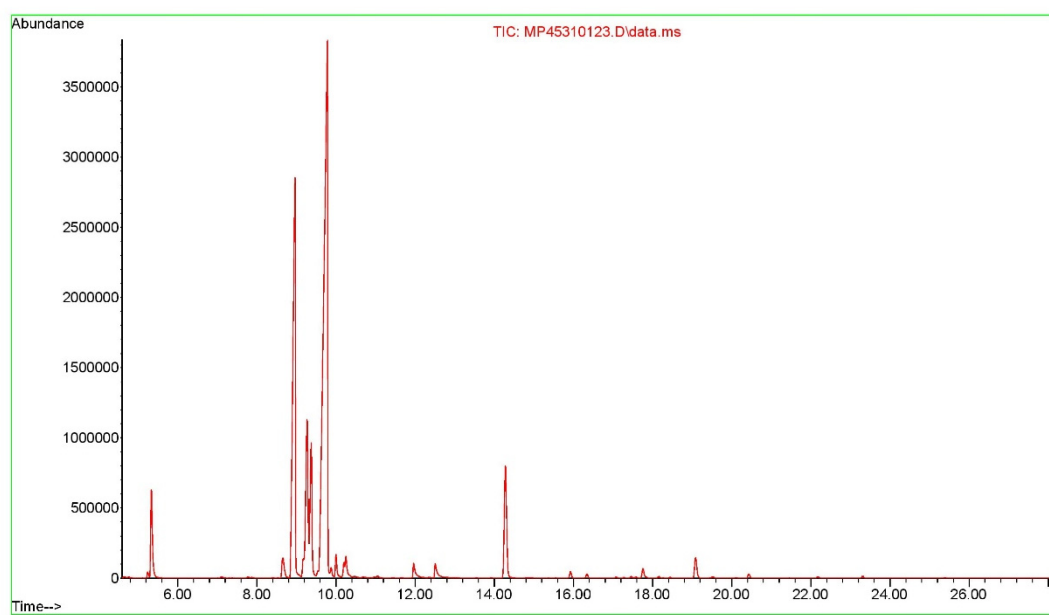

Figure 284 GC-MS chromatogram of *M. x piperita* after 80 days of storage

## 6.6. GC-MS chromatograms of the *M. x piperita* essential oil during storage in glass tubes sealed with cap at 35 °C for 3 months

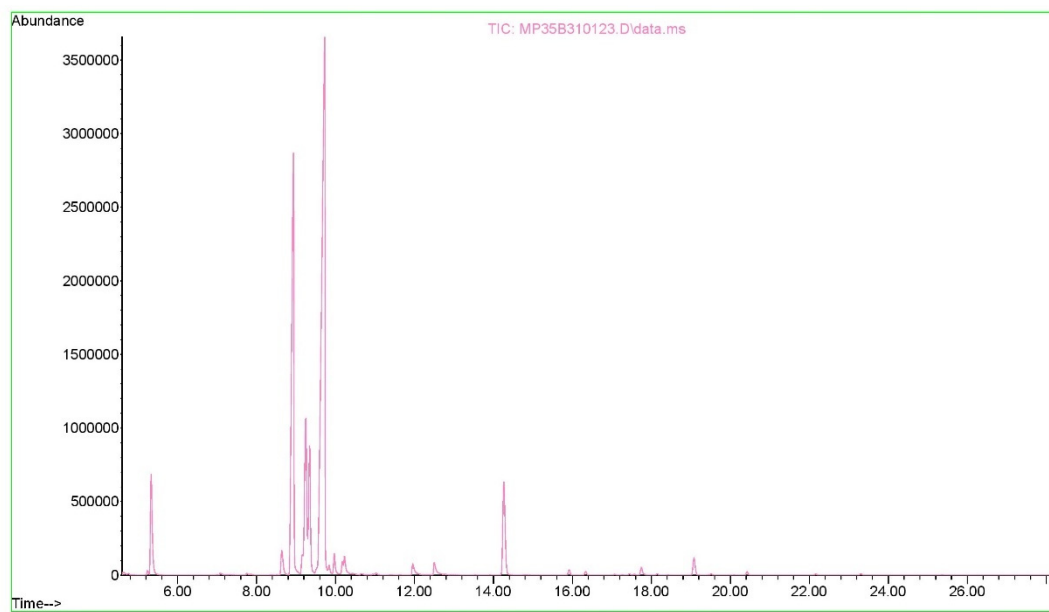

Figure 285 GC-MS chromatogram of *M. x piperita* after 10 days of storage

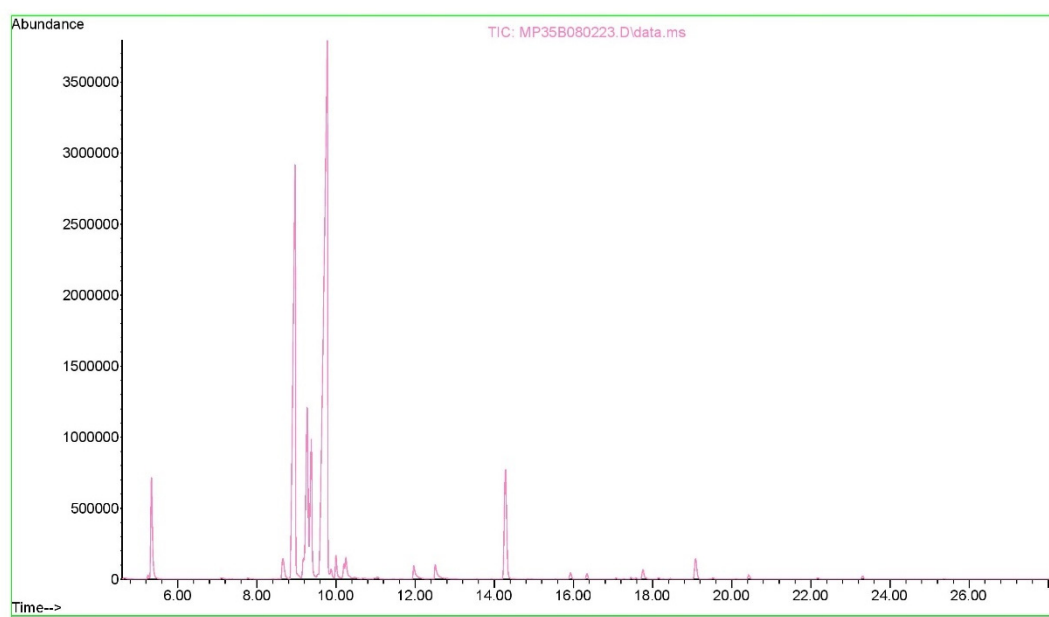

Figure 286 GC-MS chromatogram of *M. x piperita* after 20 days of storage

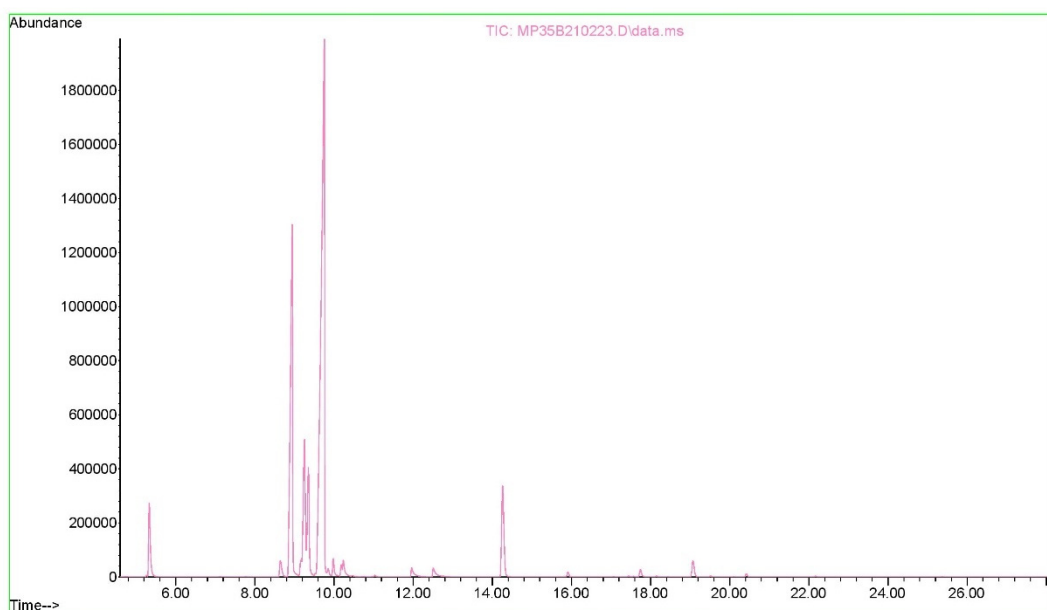

Figure 287 GC-MS chromatogram of *M. x piperita* after 30 days of storage

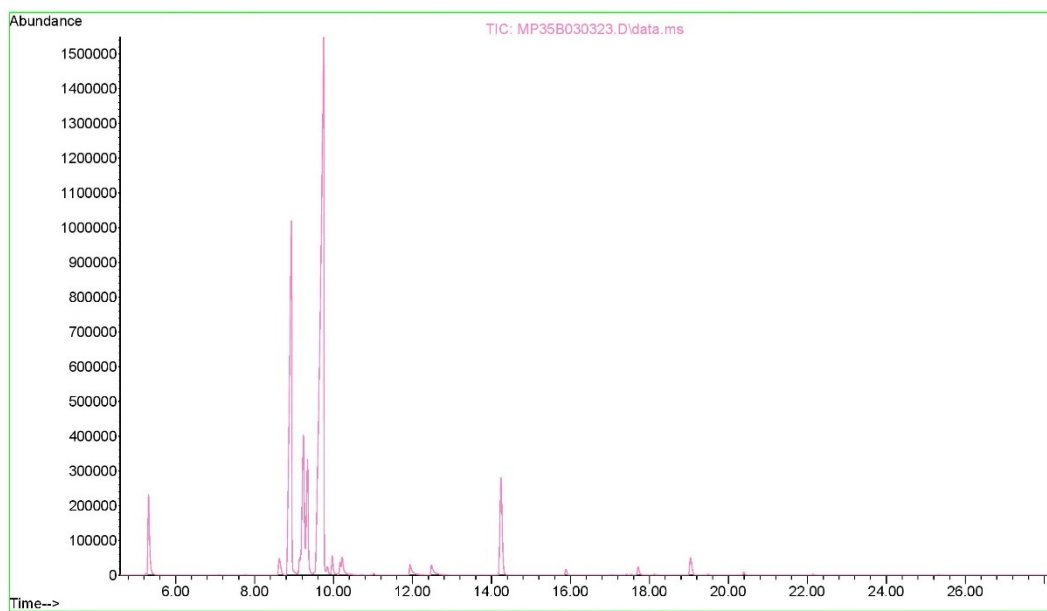

Figure 288 GC-MS chromatogram of *M. x piperita* after 40 days of storage

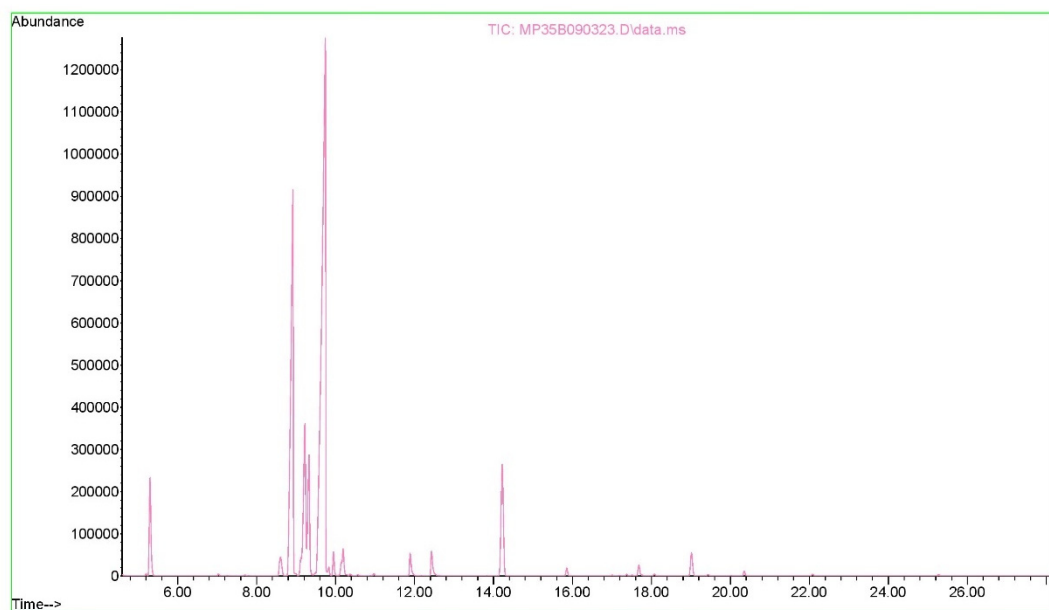

Figure 289 GC-MS chromatogram of *M. x piperita* after 50 days of storage

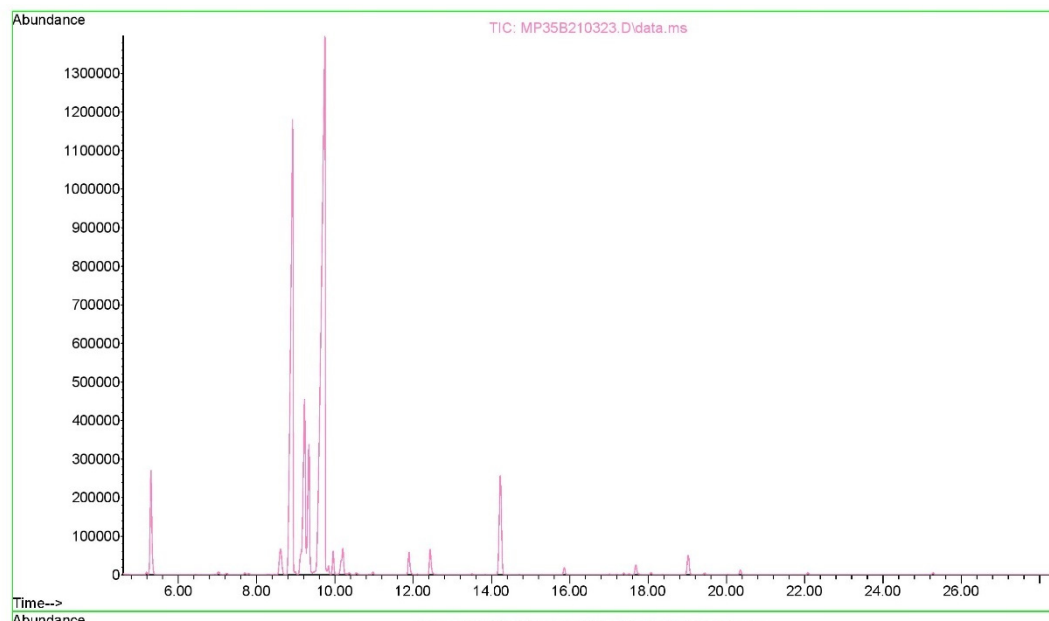

Figure 290 GC-MS chromatogram of *M. x piperita* after 60 days of storage

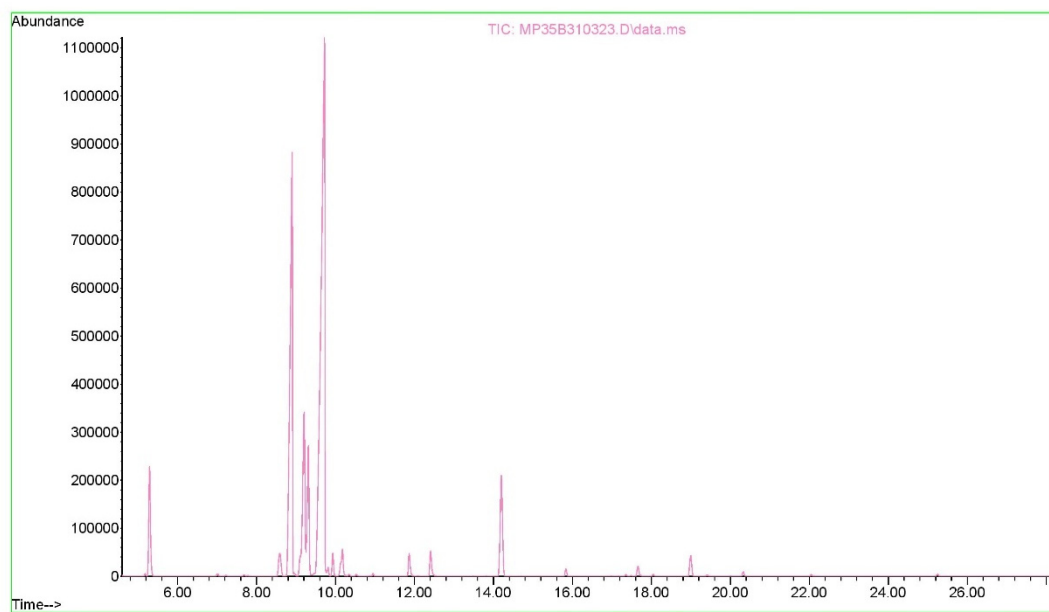

Figure 291 GC-MS chromatogram of *M. x piperita* after 70 days of storage

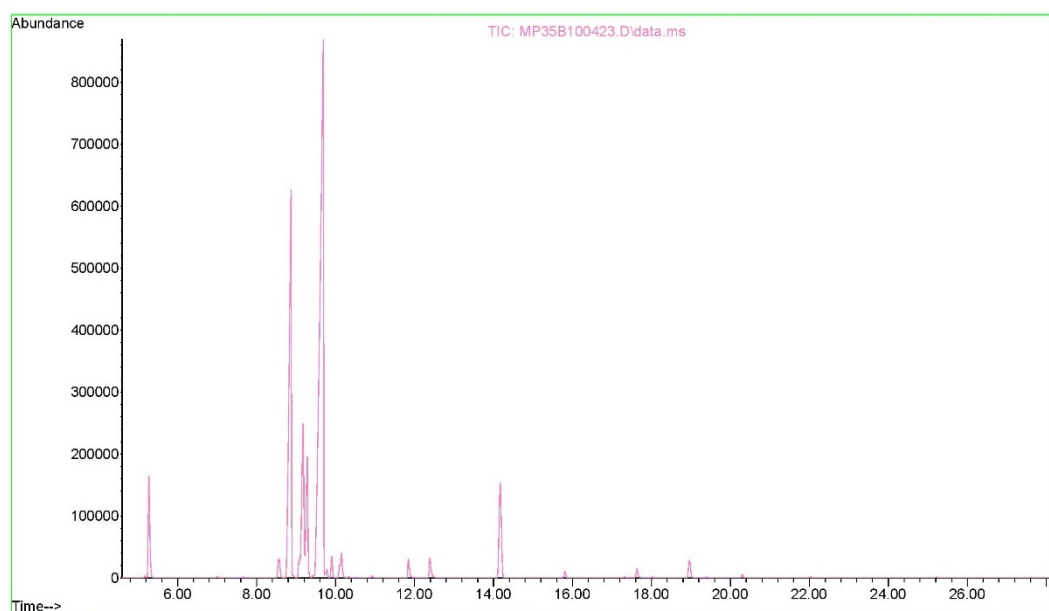

Figure 292 GC-MS chromatogram of *M. x piperita* after 80 days of storage

6.7. GC-MS chromatograms of the *M. x piperita* essential oil during storage in glass tubes sealed with cap at 45 °C for 3 months

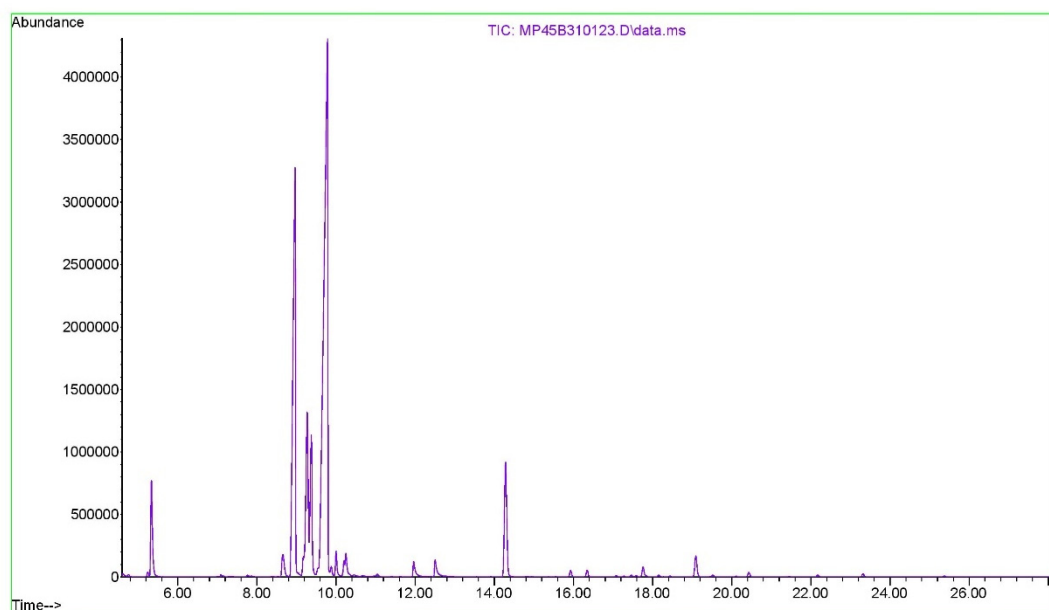

Figure 293 GC-MS chromatogram of *M. x piperita* after 10 days of storage

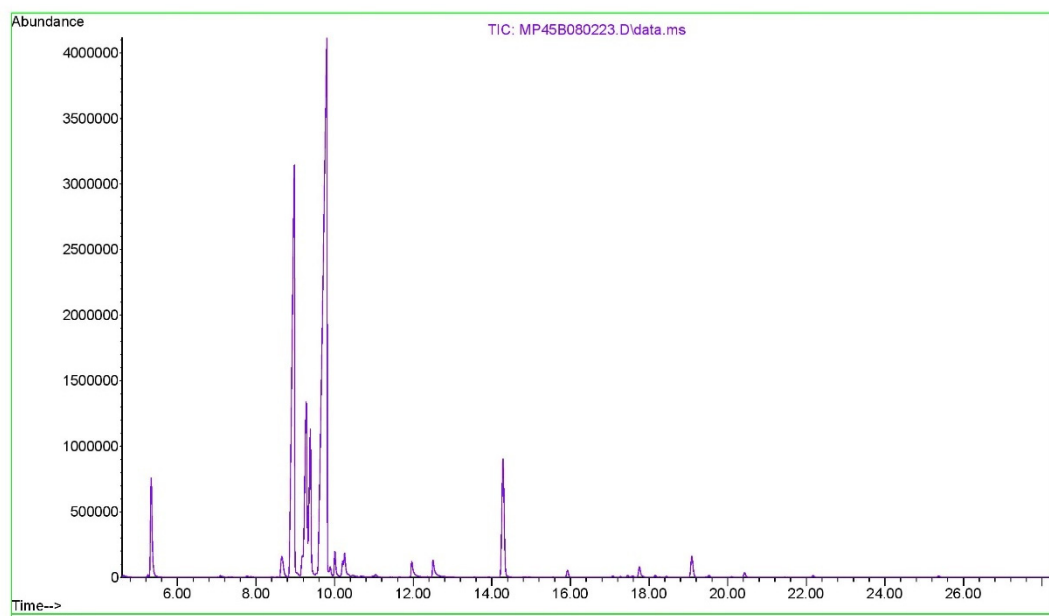

Figure 294 GC-MS chromatogram of *M. x piperita* after 20 days of storage

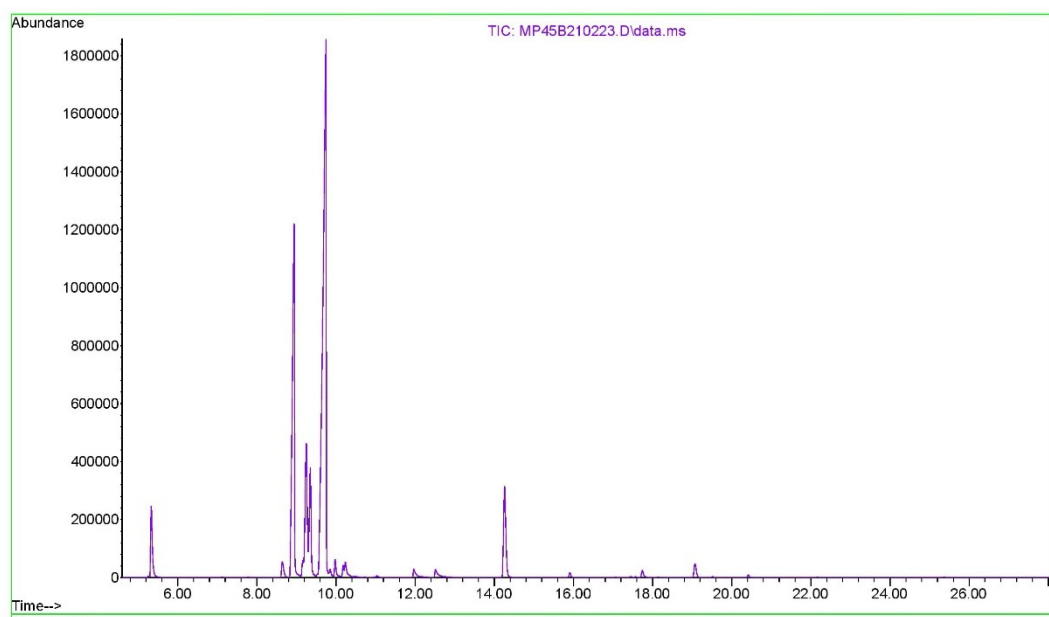

Figure 295 GC-MS chromatogram of *M. x piperita* after 30 days of storage

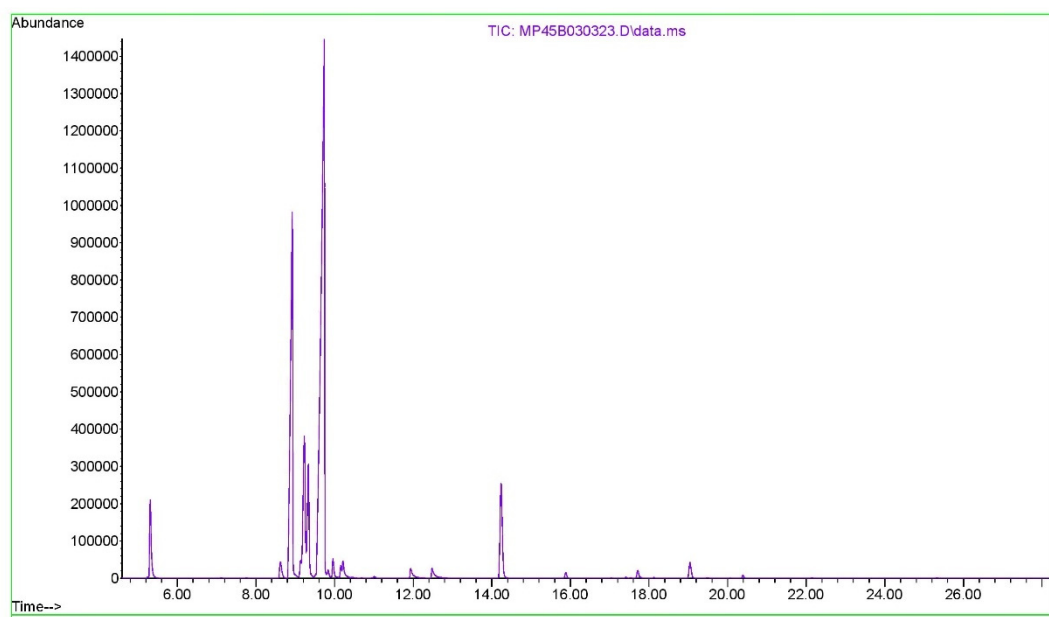

Figure 296 GC-MS chromatogram of *M. x piperita* after 40 days of storage

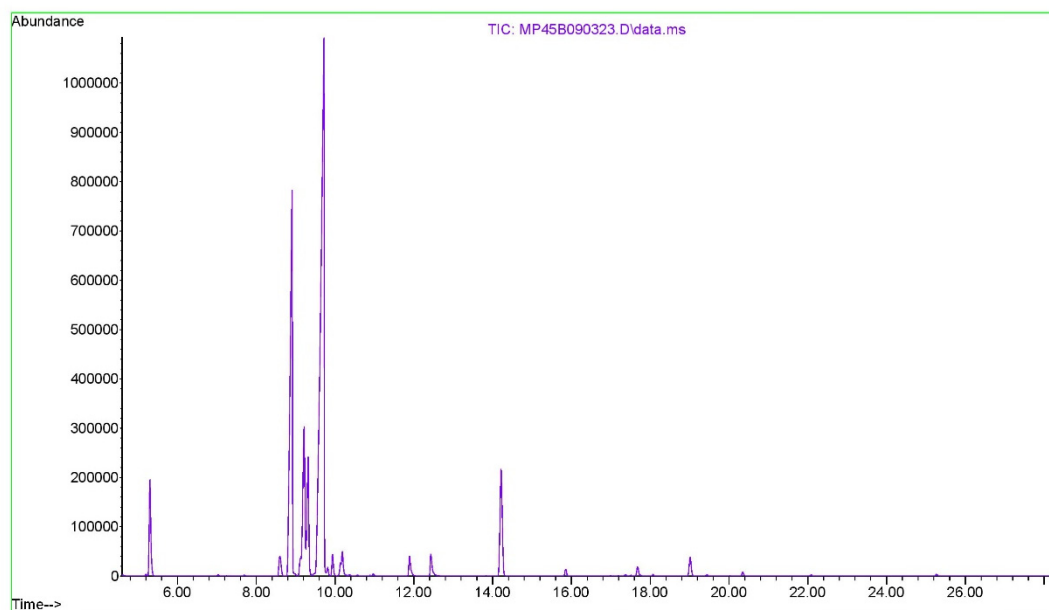

Figure 297 GC-MS chromatogram of *M. x piperita* after 50 days of storage

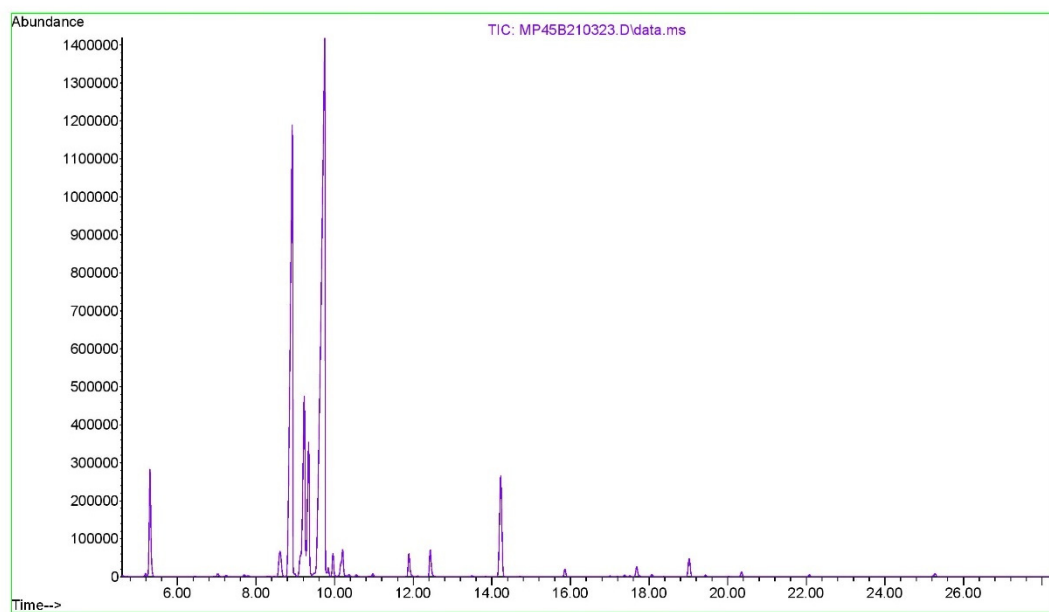

Figure 298 GC-MS chromatogram of *M. x piperita* after 60 days of storage

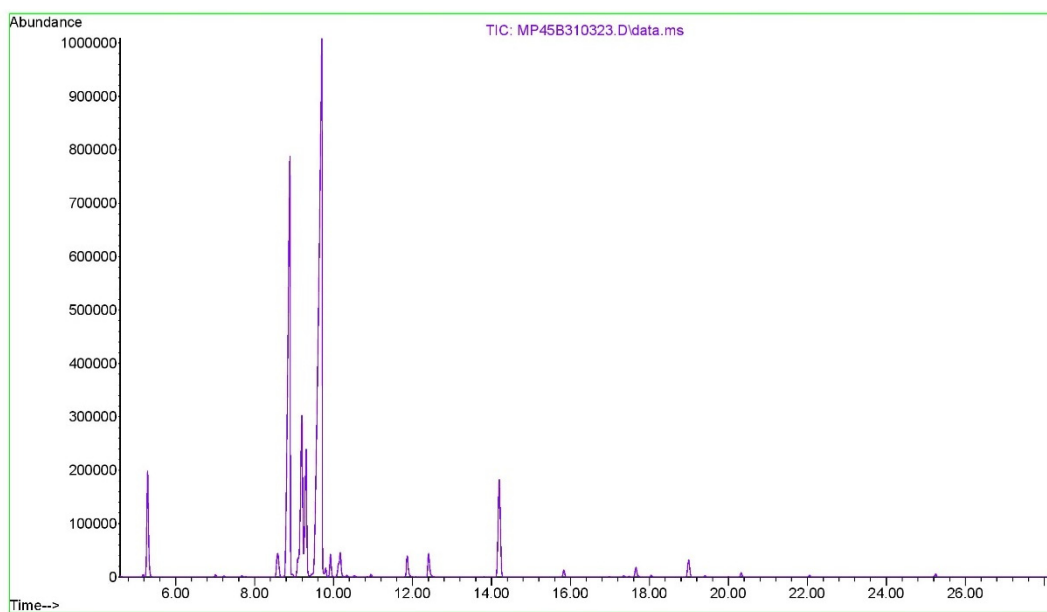

Figure 299 GC-MS chromatogram of *M. x piperita* after 70 days of storage

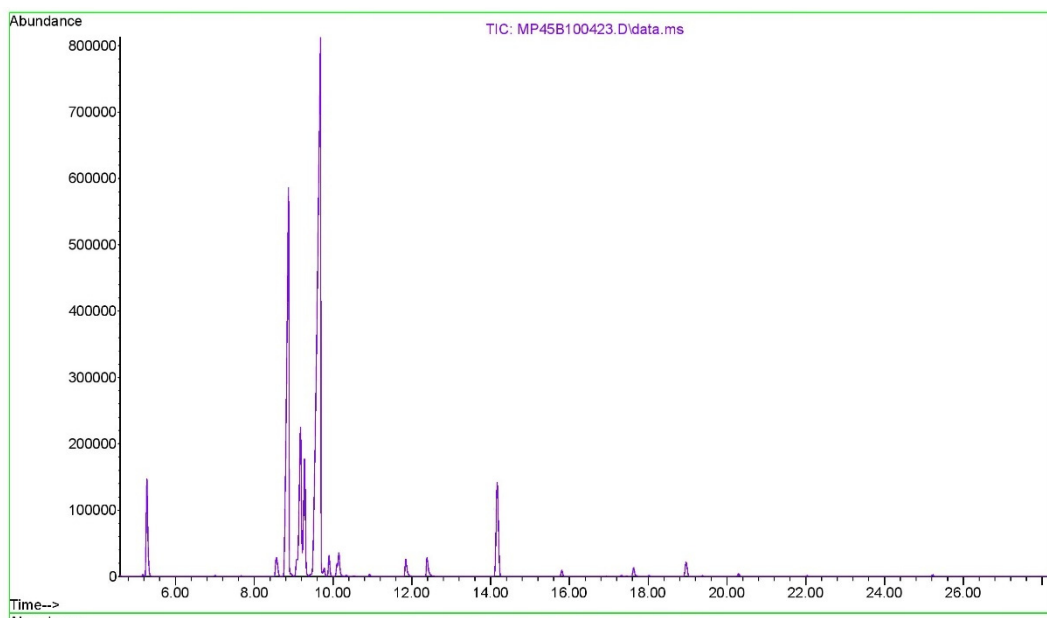

Figure 300 GC-MS chromatogram of *M. x piperita* after 80 days of storage

### 6.8. GC-MS chromatograms of the *M. x piperita* essential oil during storage in glass tubes sealed with cap at 4 °C for 6 months

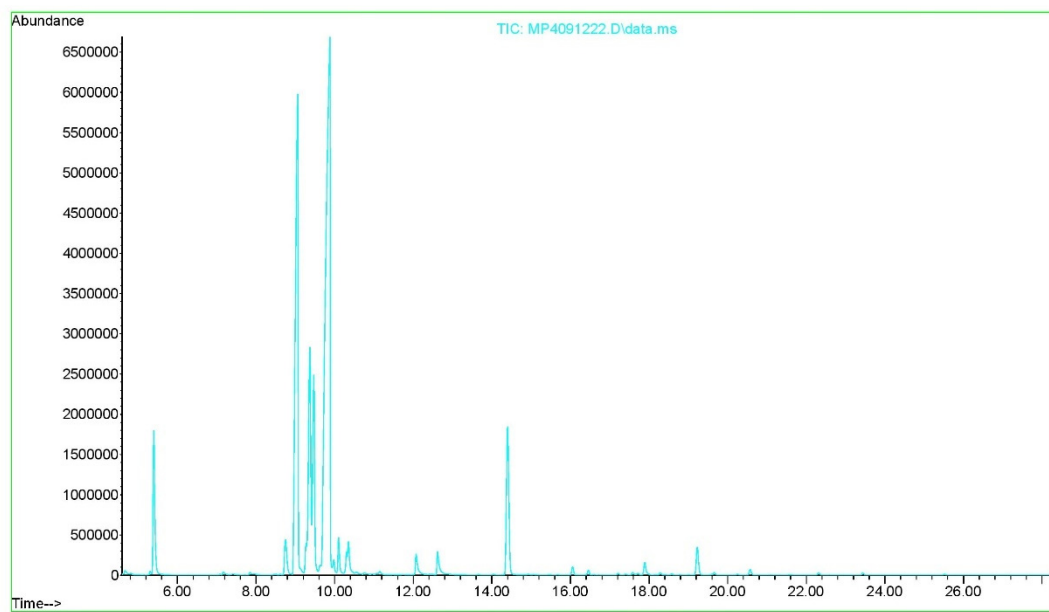

Figure 301 GC-MS chromatogram of *M. x piperita* after 30 days of storage

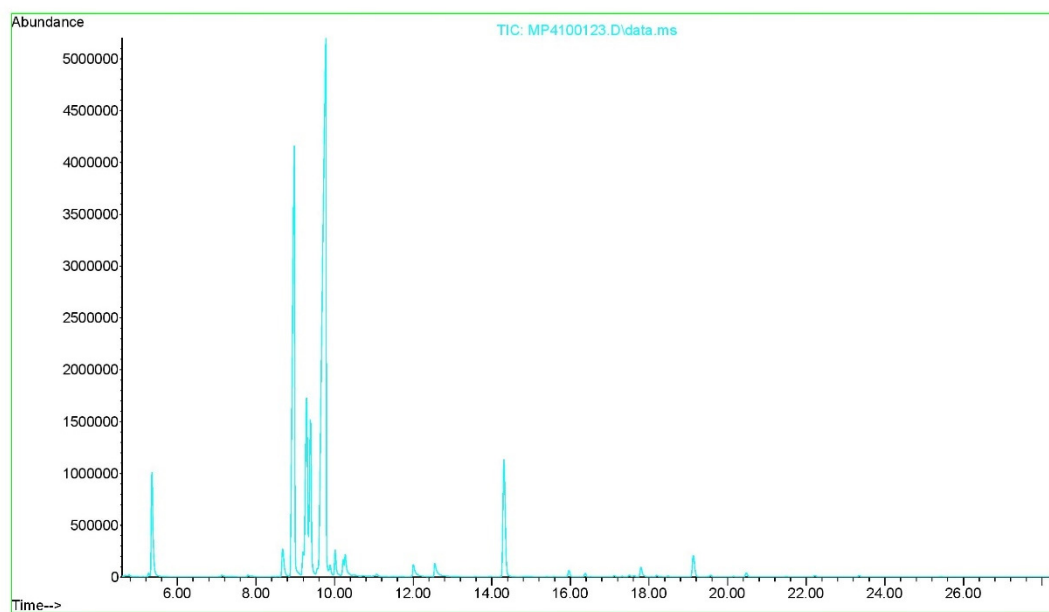

Figure 302 GC-MS chromatogram of *M. x piperita* after 60 days of storage

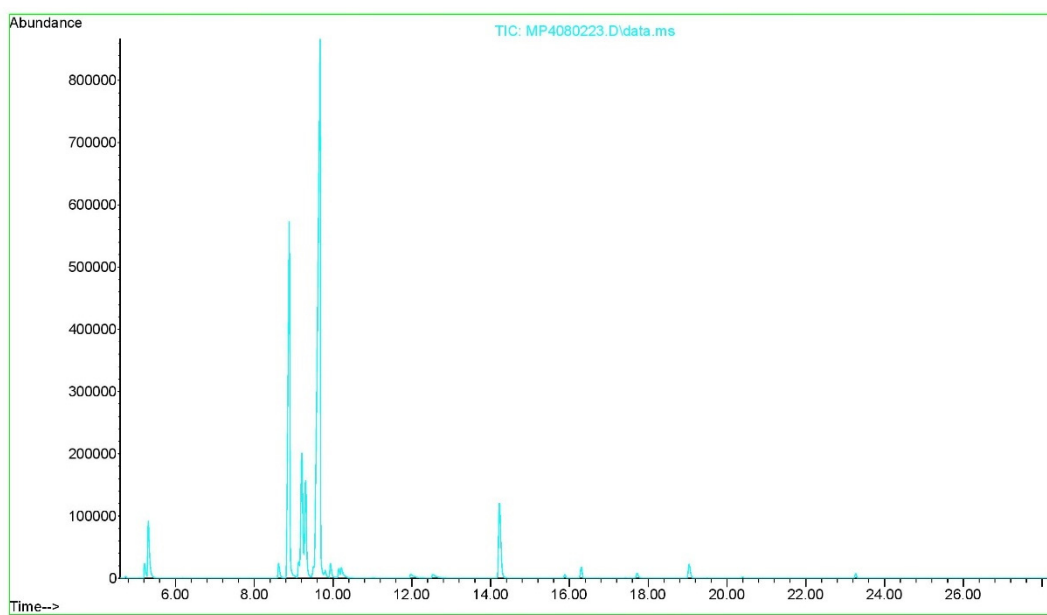

Figure 303 GC-MS chromatogram of *M. x piperita* after 90 days of storage

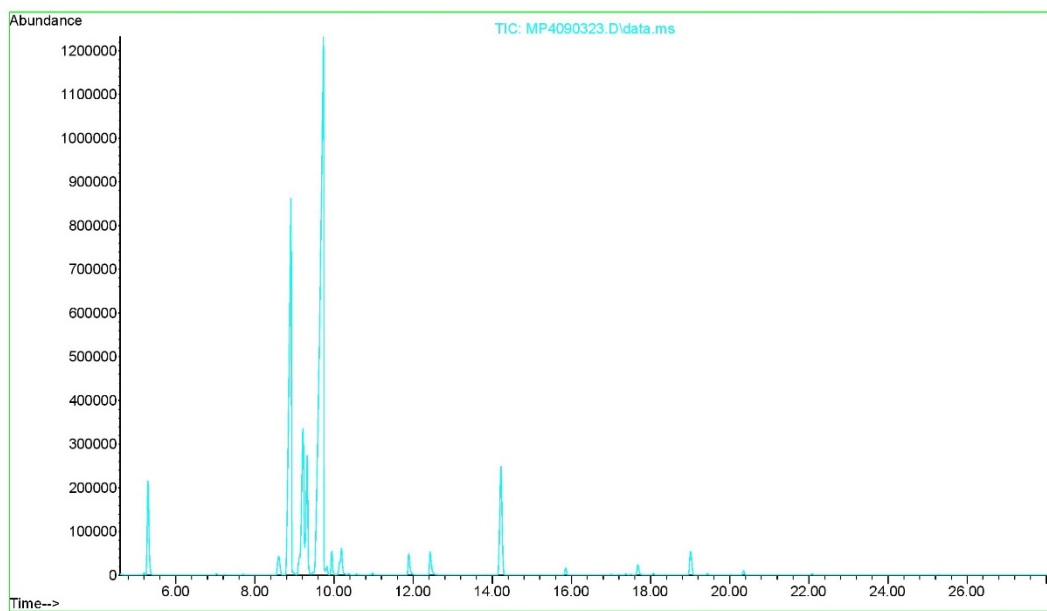

Figure 304 GC-MS chromatogram of *M. x piperita* after 120 days of storage

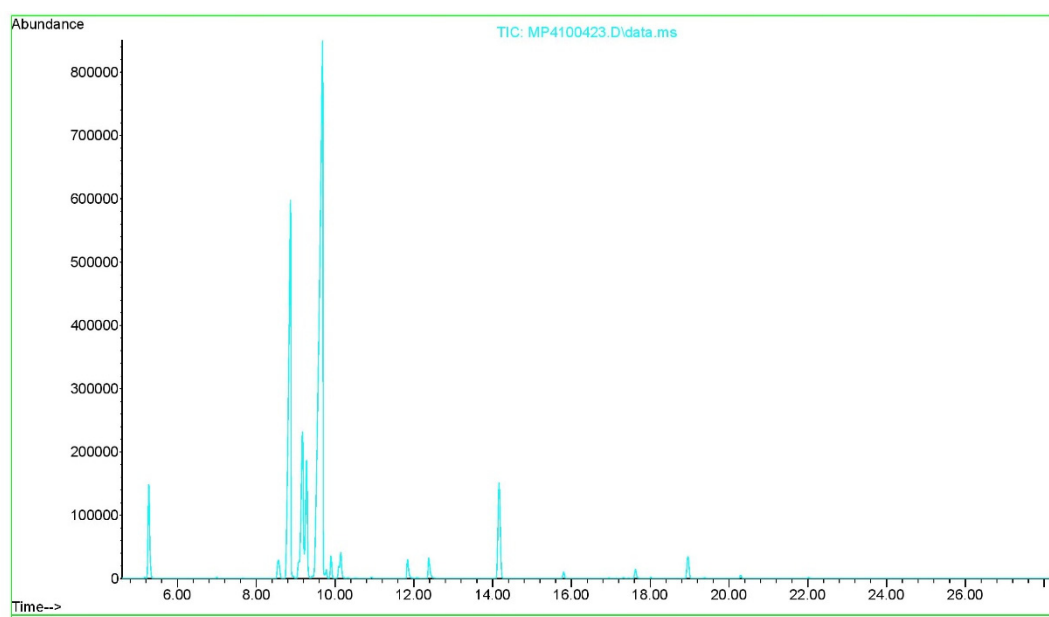

Figure 305 GC-MS chromatogram of *M. x piperita* after 150 days of storage

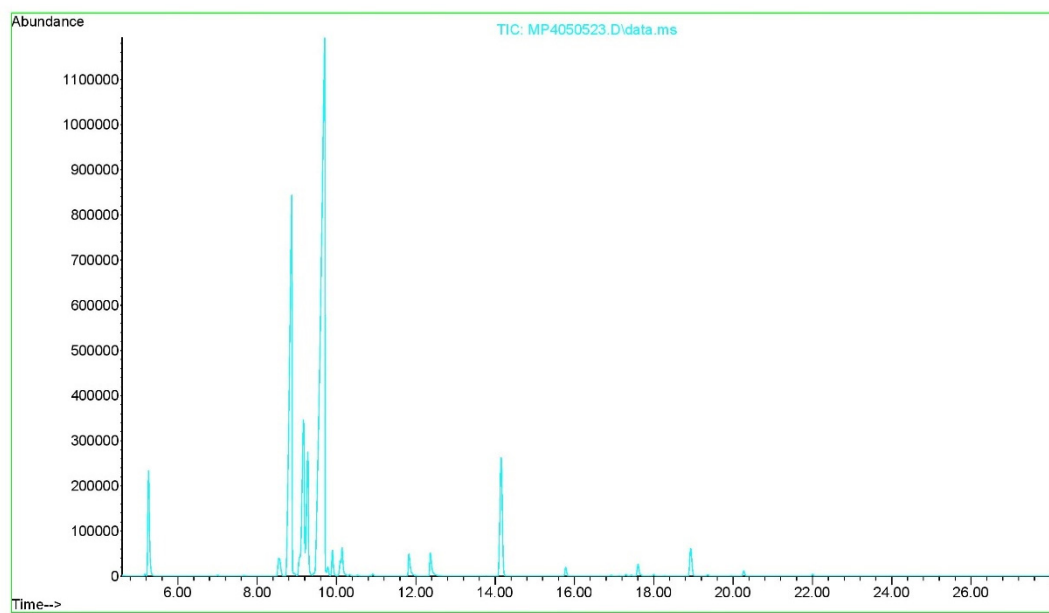

Figure 306 GC-MS chromatogram of *M. x piperita* after 180 days of storage

6.9. GC-MS chromatogram of the *M. x piperita* essential oil during storage in metal container at 4 °C for 6 months

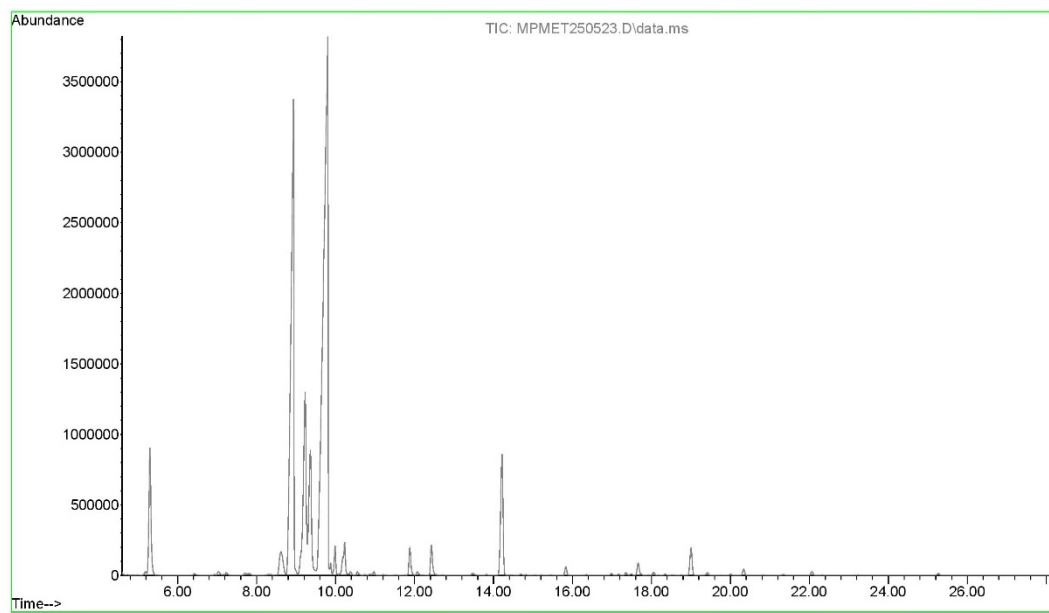

Figure 307 GC-MS chromatogram of *M. x piperita* after 180 days of storage

6.10. GC-MS chromatogram of the *M. x piperita* essential oil during storage in sealed glass ampoules at 4 °C for 6 months

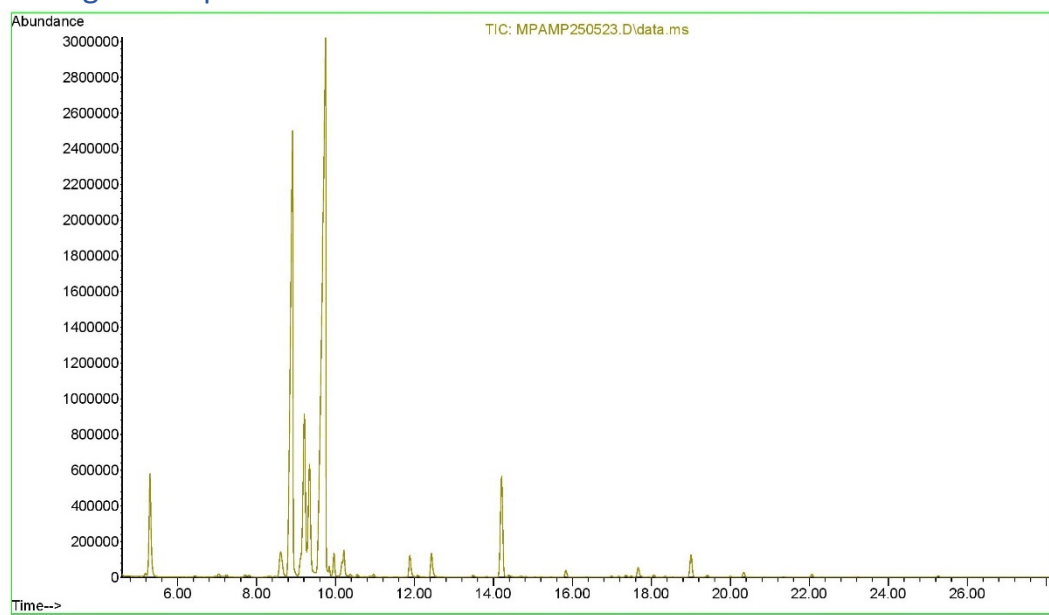

Figure 308 GC-MS chromatogram of *M. x piperita* after 180 days of storage

6.11. GC-MS chromatogram of the *M. x piperita* essential oil during storage in glass tubes sealed with cap at -20 °C for 6 months

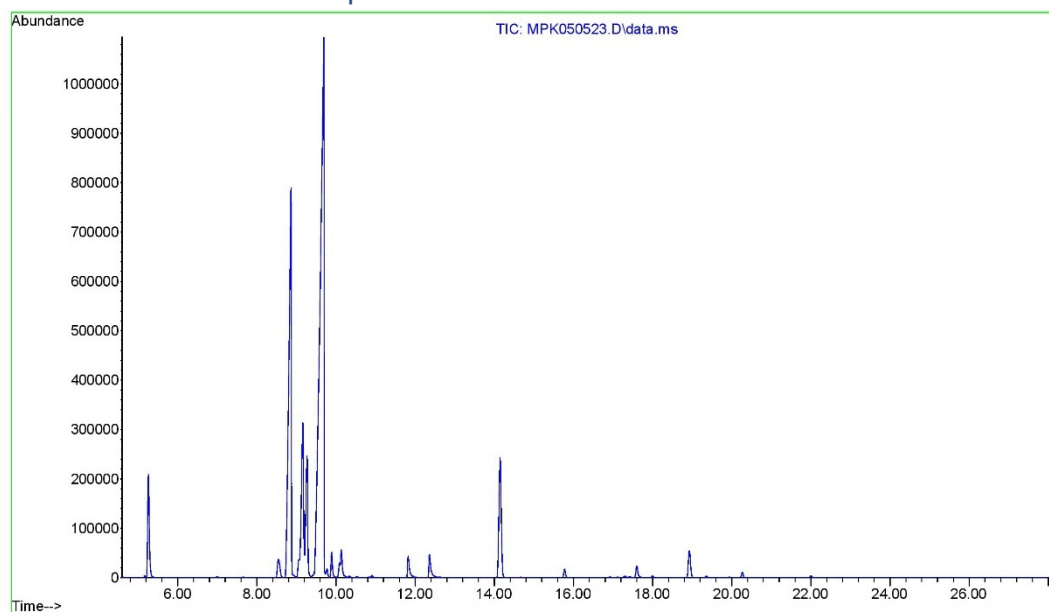

Figure 309 GC-MS chromatogram of *M. x piperita* after 180 days of storage
